# Supplementary material for: Genome analyses of the sunflower pathogen Plasmopara halstedii provide insights into effector evolution in downy mildews and Phytophthora
Source: BMC Genomics. 2015 Oct 5;16:741. doi: 10.1186/s12864-015-1904-7 (PMC4594904; doi:10.1186/s12864-015-1904-7)
Supplement: Additional file 2: — Supplementary figures. (PDF 34119 kb) [file 12864_2015_1904_MOESM2_ESM.pdf]

## Supplementary Figure 1

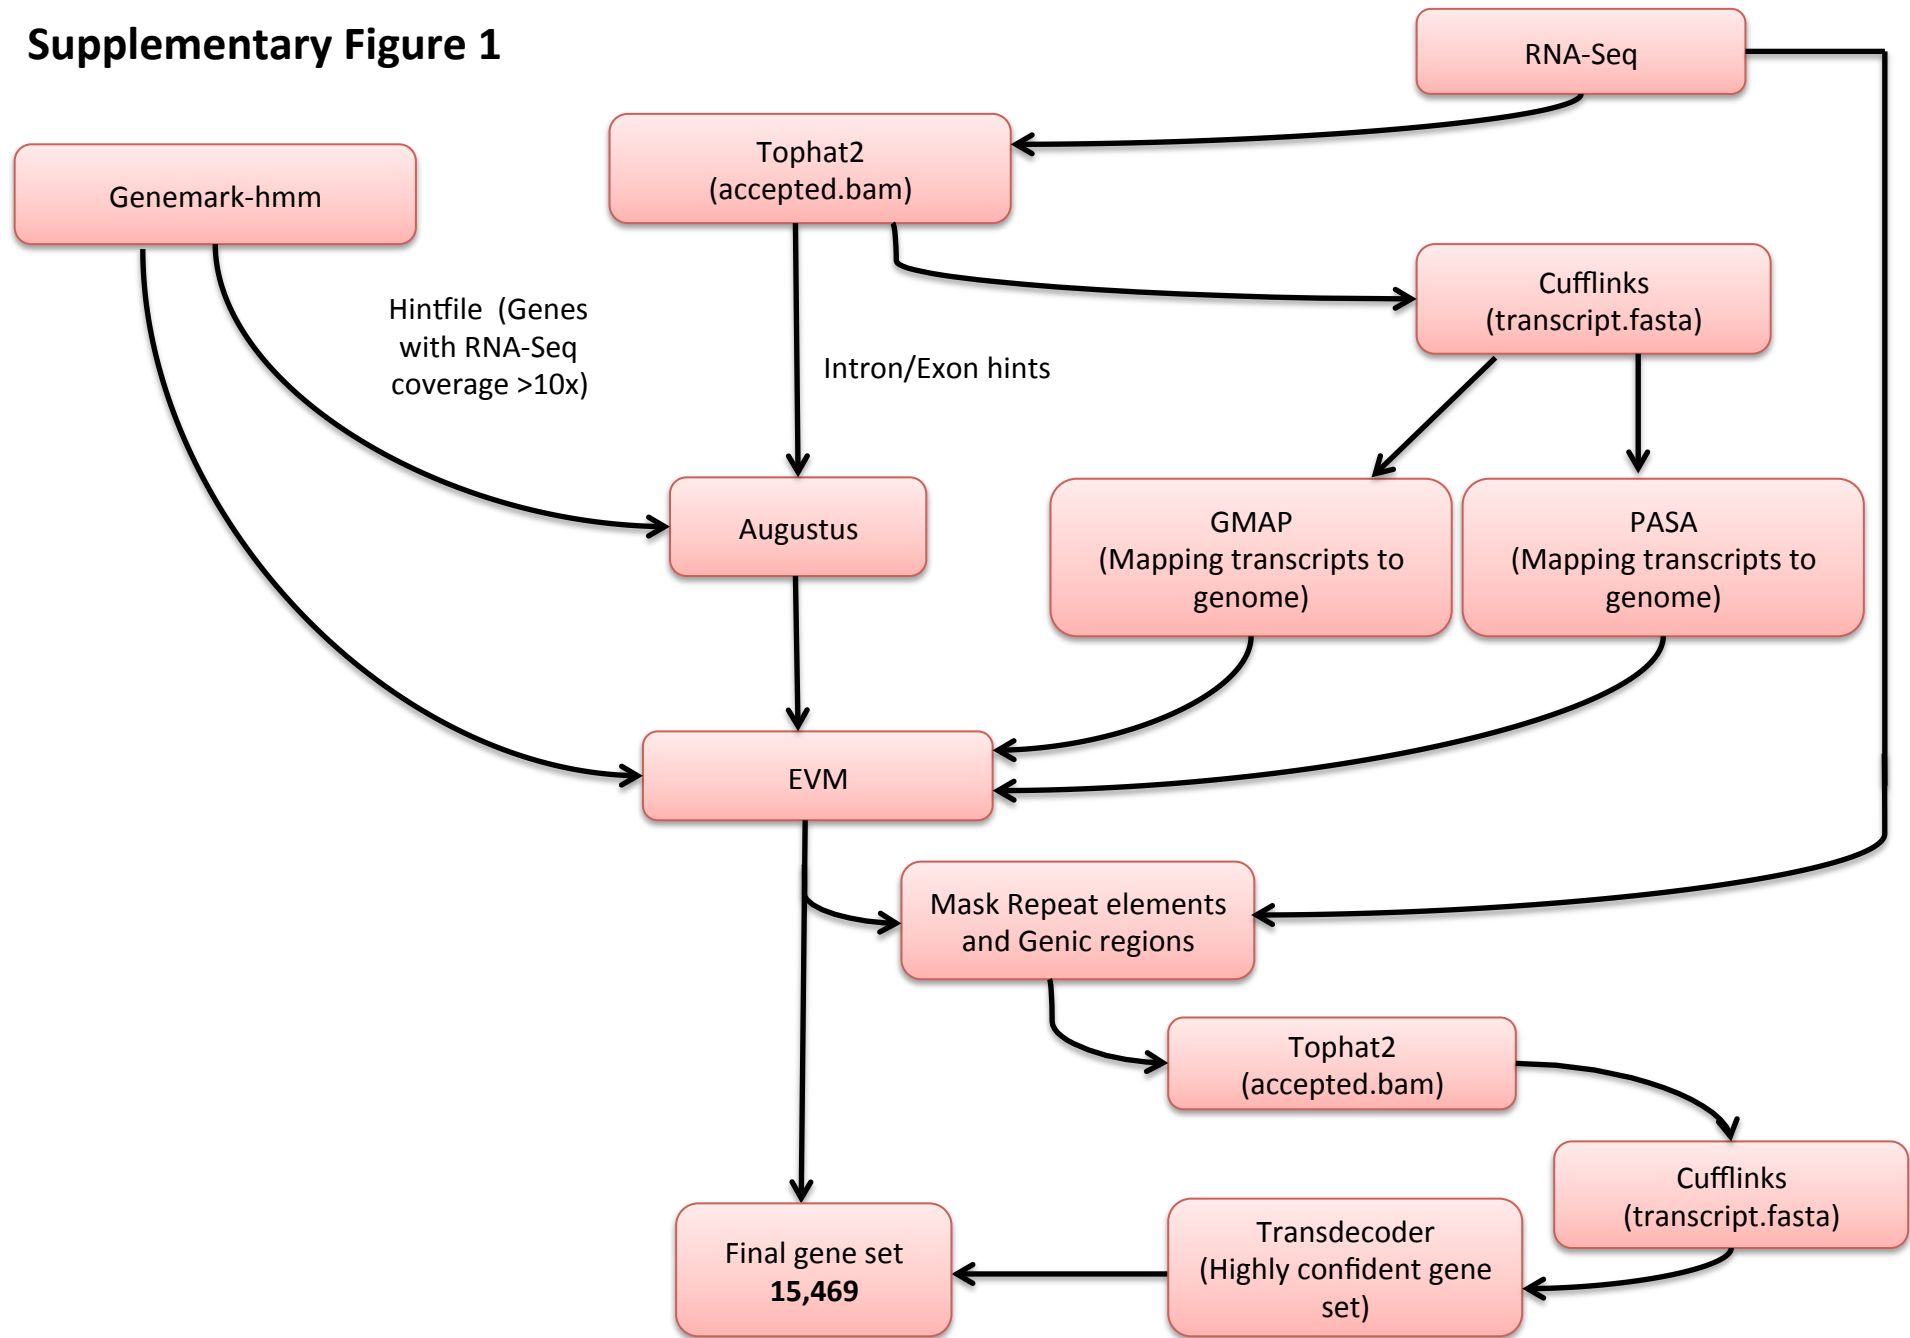

**Supplementary Figure 1. Gene prediction pipeline (adapted from *sharma et. al.* 2015):** Gene prediction pipeline used to generate highly confident gene models using both *ab-initio* based and transcript mapping based approaches.

## Supplementary Figure 2

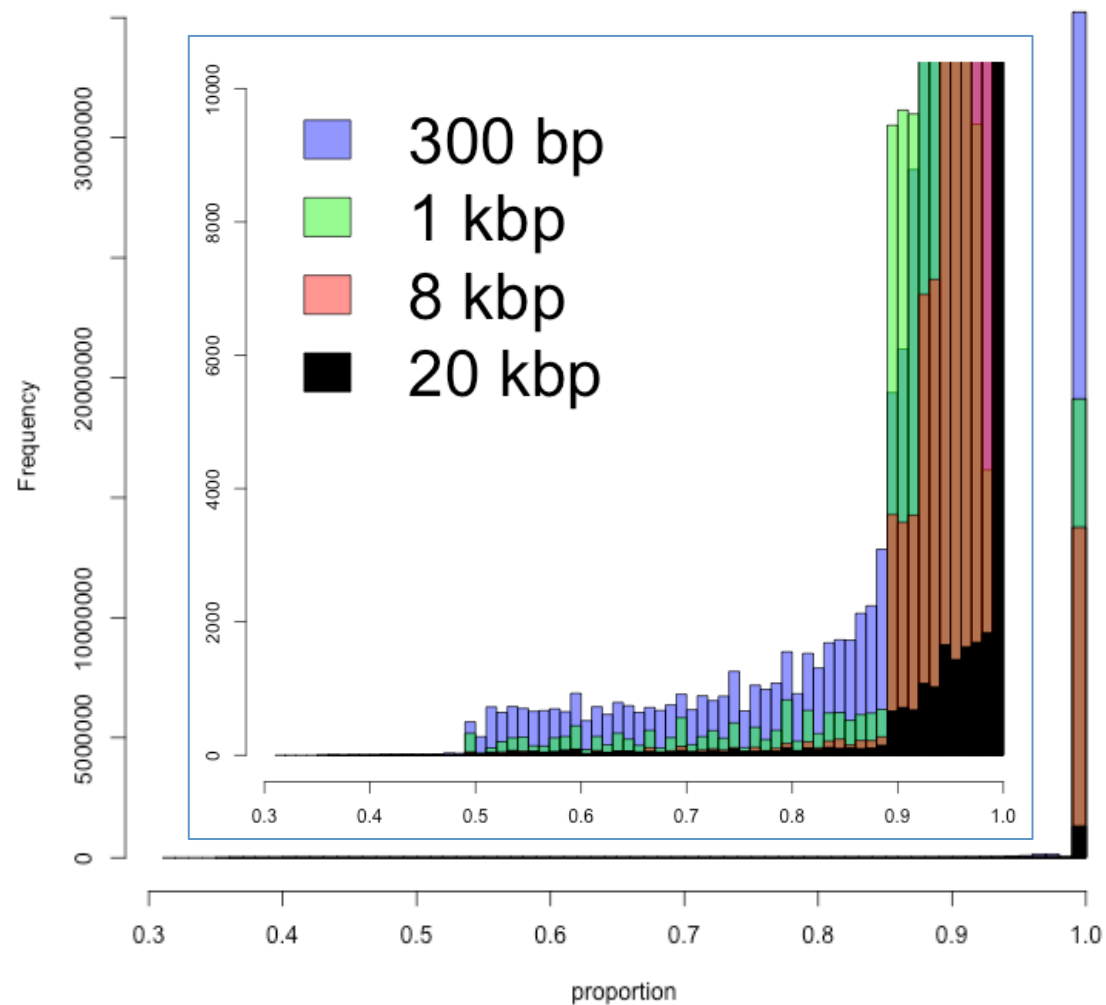

**Supplementary Figure 2. Low levels of heterozygosity in *Pl. halstedii*.** The histogram shows the frequency distribution for proportions of aligned reads matching the major allele. Proportions are based alignment of sequence reads against the *P. halstedii* reference assembly. Data are color-coded according to which of the four genomic libraries was used to generate the alignments. The inset shows the same data as the main figure but with the vertical axis truncated at 10,000. Heterozygous sites would be expected to generate a major-allele-frequency proportion close to 0.5 whilst homozygous sites would fall close to 1; therefore, in a diploid genome with significant levels of heterozygosity, we would expect a bimodal frequency distribution with peaks close to 0.5 and close to 1. The alignment of sequence reads against the reference genome was performed with BWA (Li & Durbin, 2009) as described in the Methods section.

## Supplementary Figure 3

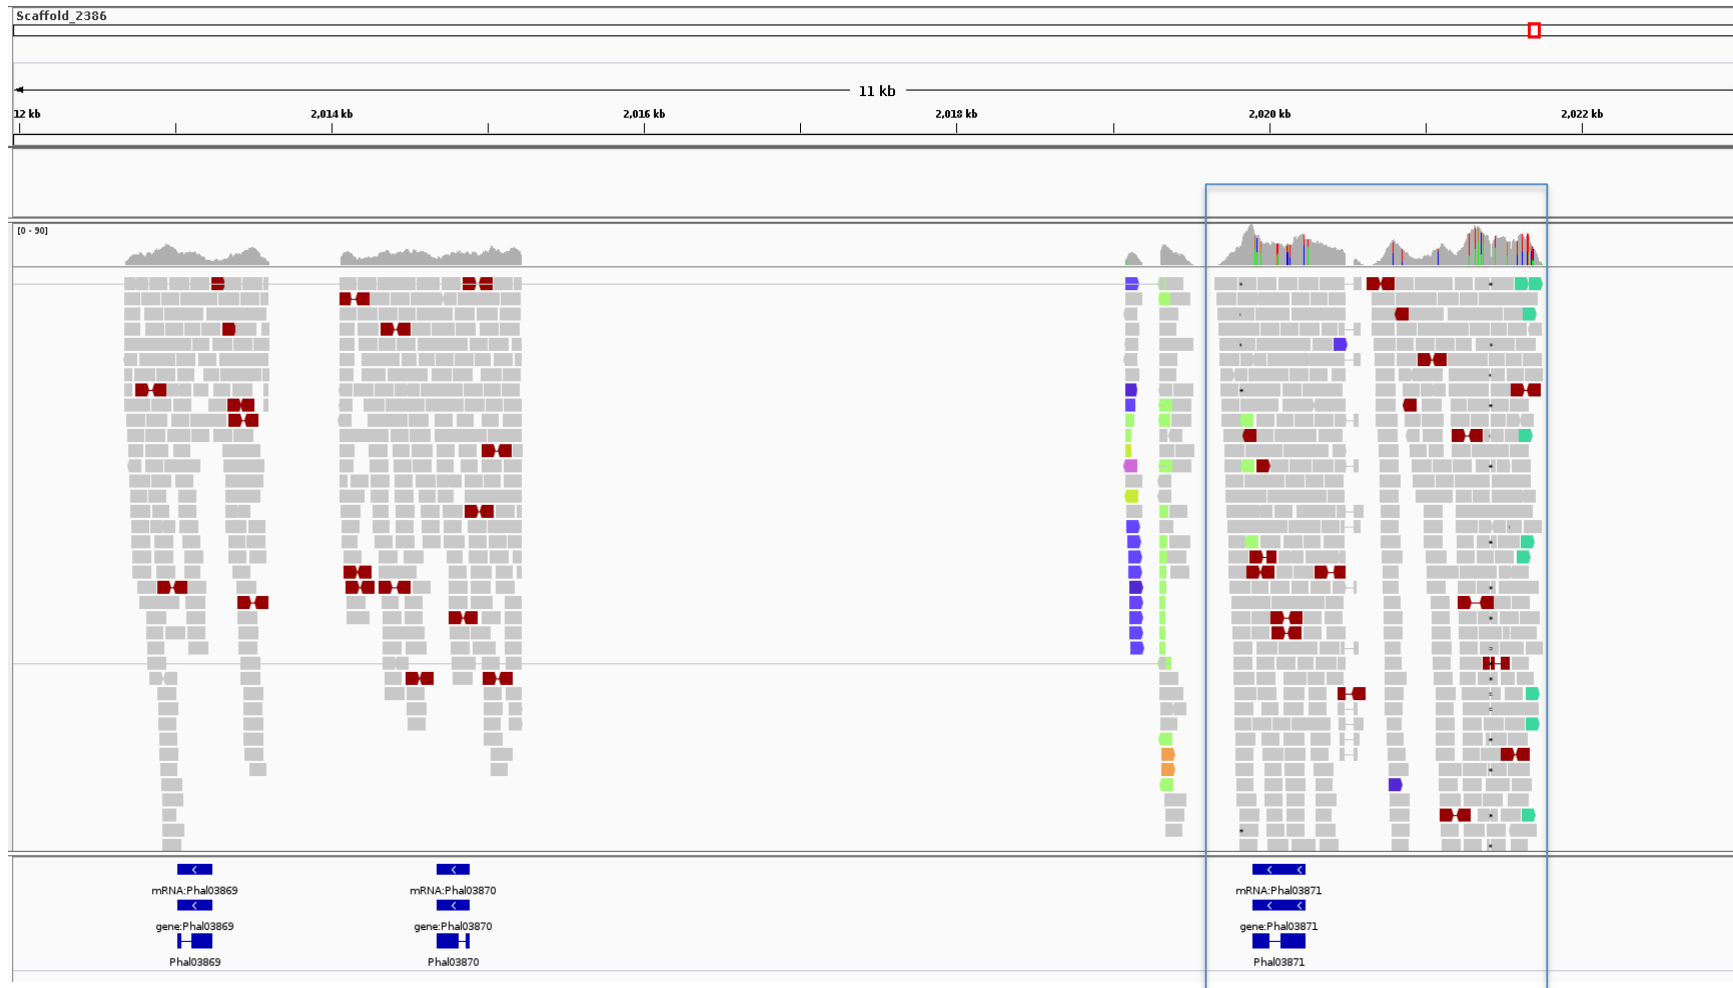

**Supplementary Figure 3:** A region of apparent heterozygosity on scaffold 2386. We aligned sequence reads from the 300-bp genomic library against the the *P. halstedii* genome assembly using BWA-mem and visualized this 11-kb region of the alignment using IGV. Sequence reads that match multiple sites on the genome are excluded. The region of apparent heterozygosity is indicated in the blue rectangle.

## Supplementary Figure 4

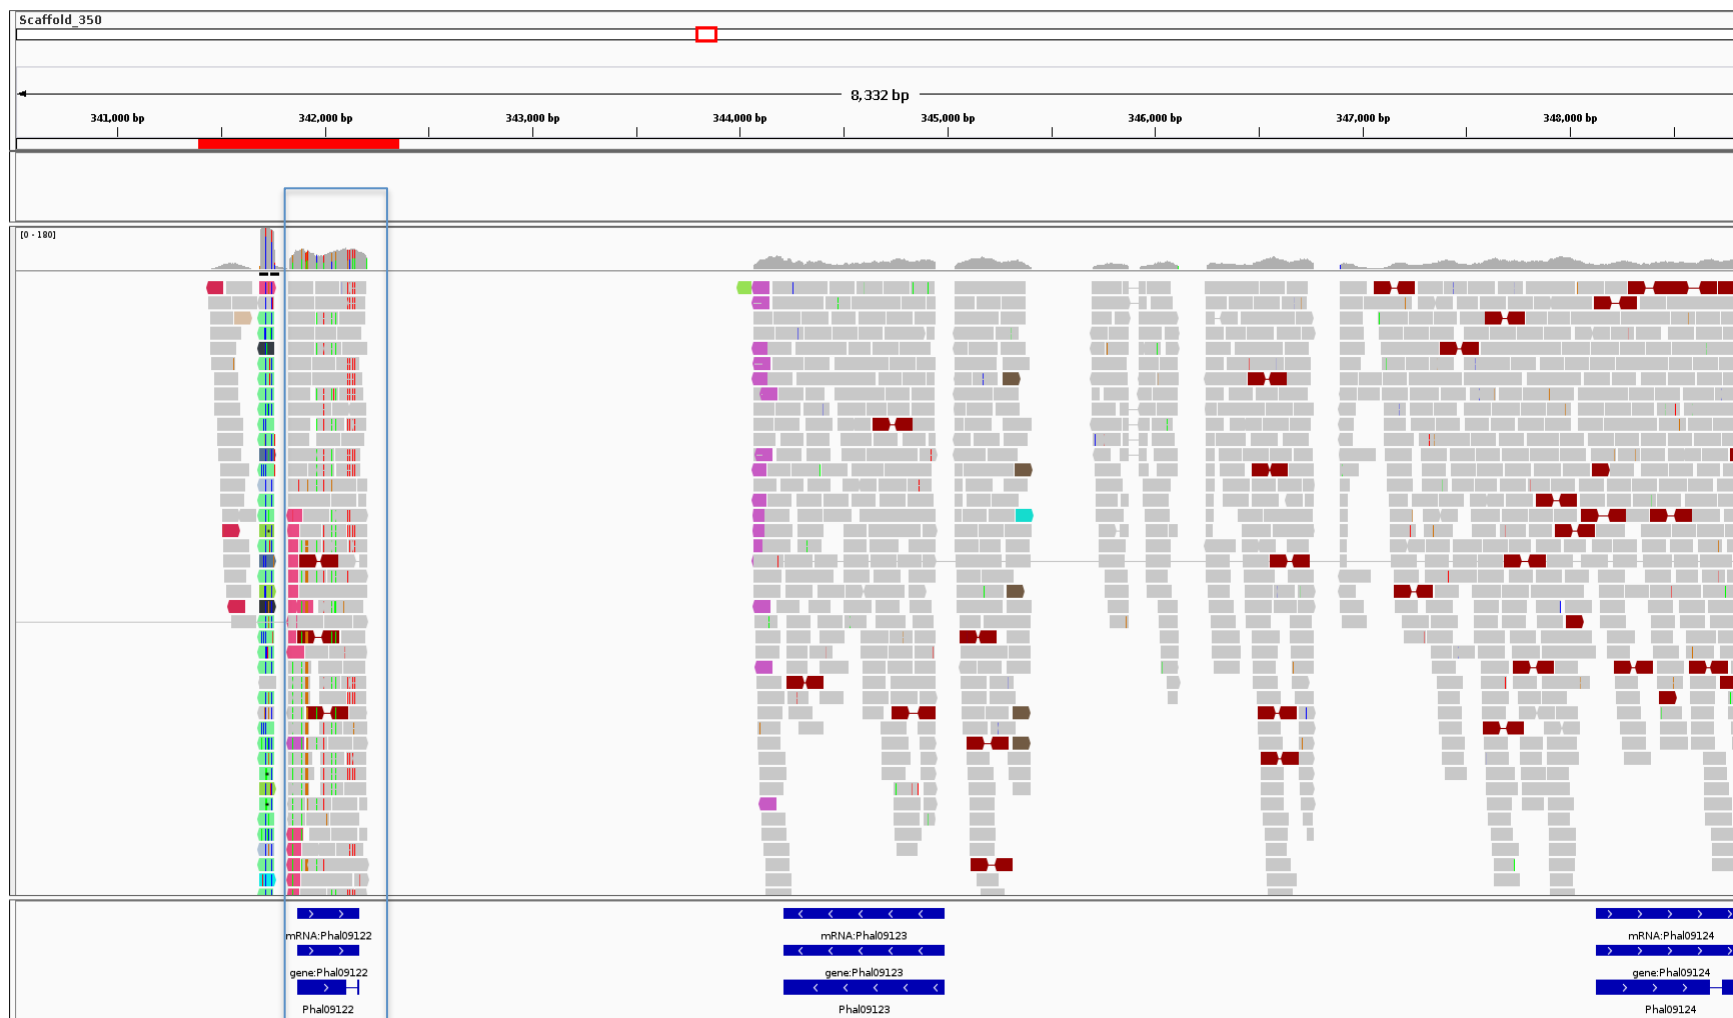

**Supplementary Figure 4:** A region of apparent heterozygosity on scaffold 350. We aligned sequence reads from the 300-bp genomic library against the the *P. halstedii* genome assembly using BWA-mem and visualized this 8.3-kb region of the alignment using IGV. Sequence reads that match multiple sites on the genome are excluded. The region of apparent heterozygosity is indicated in the blue rectangle.

## Supplementary Figure 5

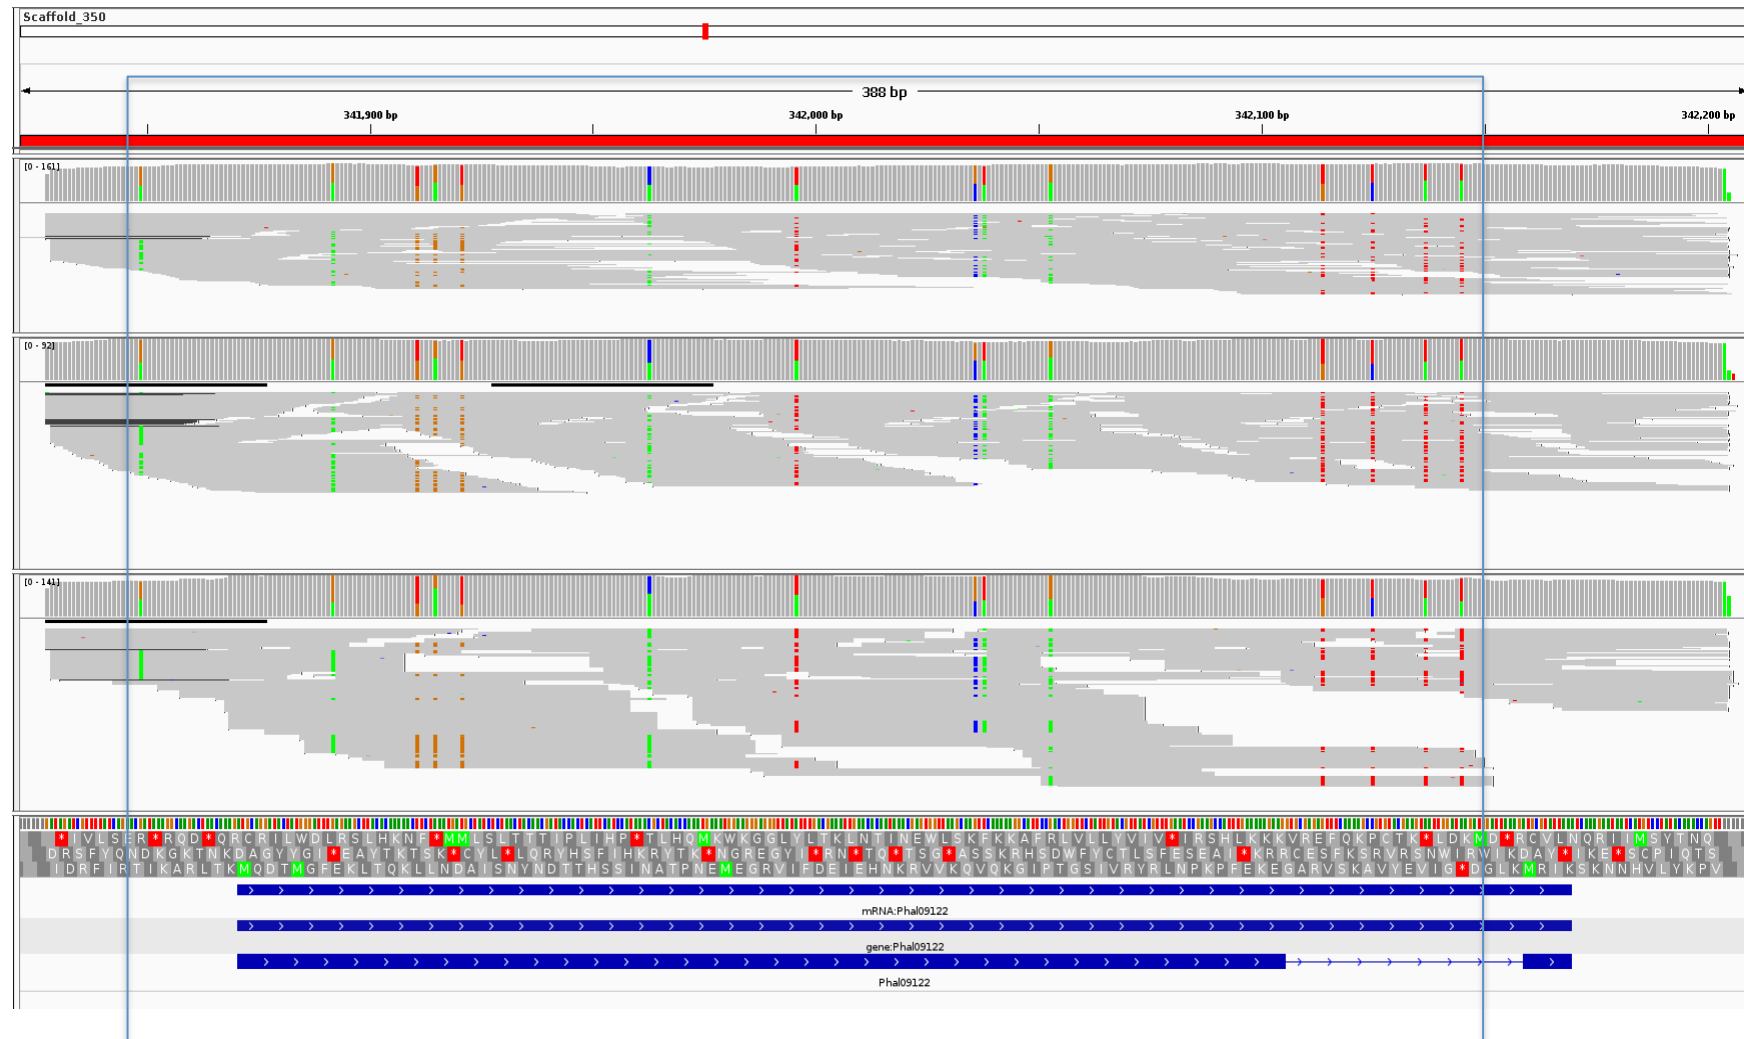

**Supplementary Figure 5:** A region of apparent heterozygosity on scaffold 350. We aligned sequence reads from the 300-bp, 1-kb and 8-kb genomic libraries against the the *P. halstedii* genome assembly using BWA-mem and visualized this 300-bp region of the alignment using IGV. Sequence reads that match multiple sites on the genome are excluded. The region of apparent heterozygosity is indicated in the blue rectangle.

## Supplementary Figure 6

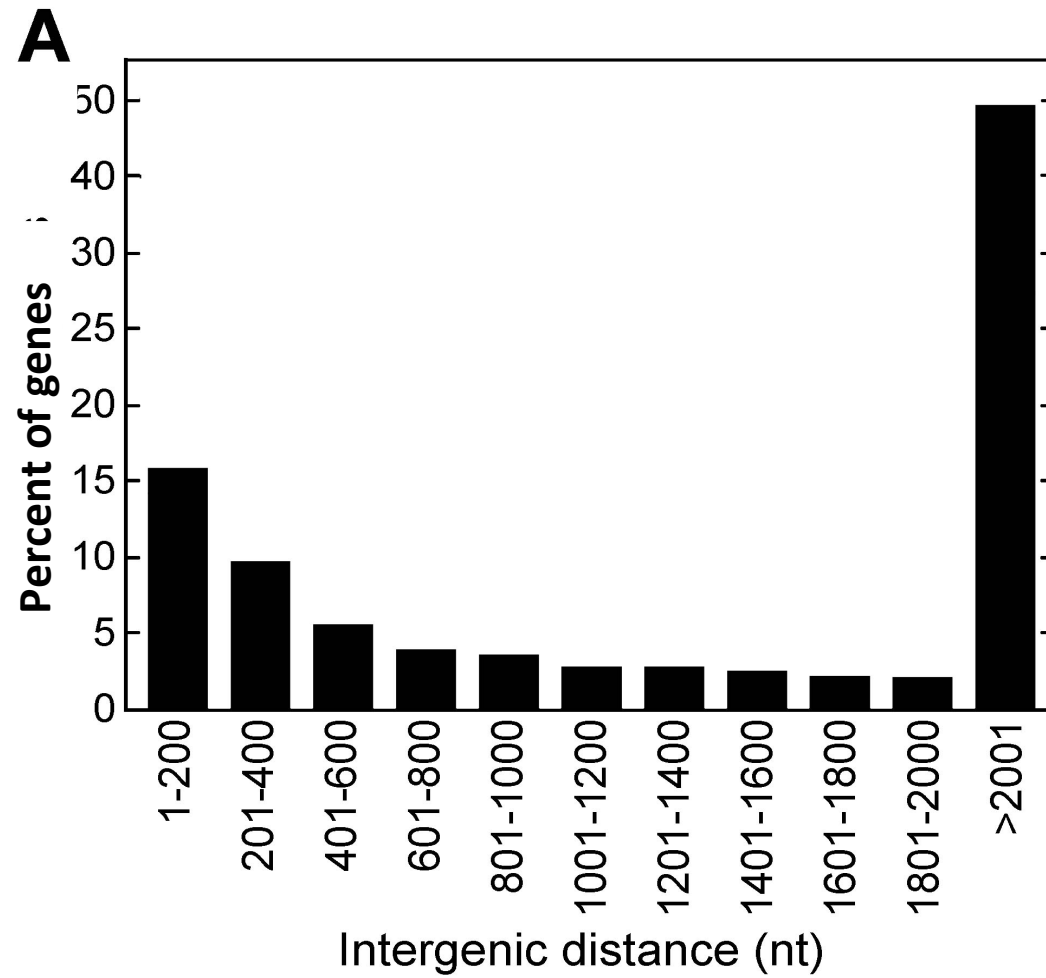

**Supplementary Figure 6:** Representation of the genome architecture of *Pl. halstedii*.

## Supplementary Figure 7

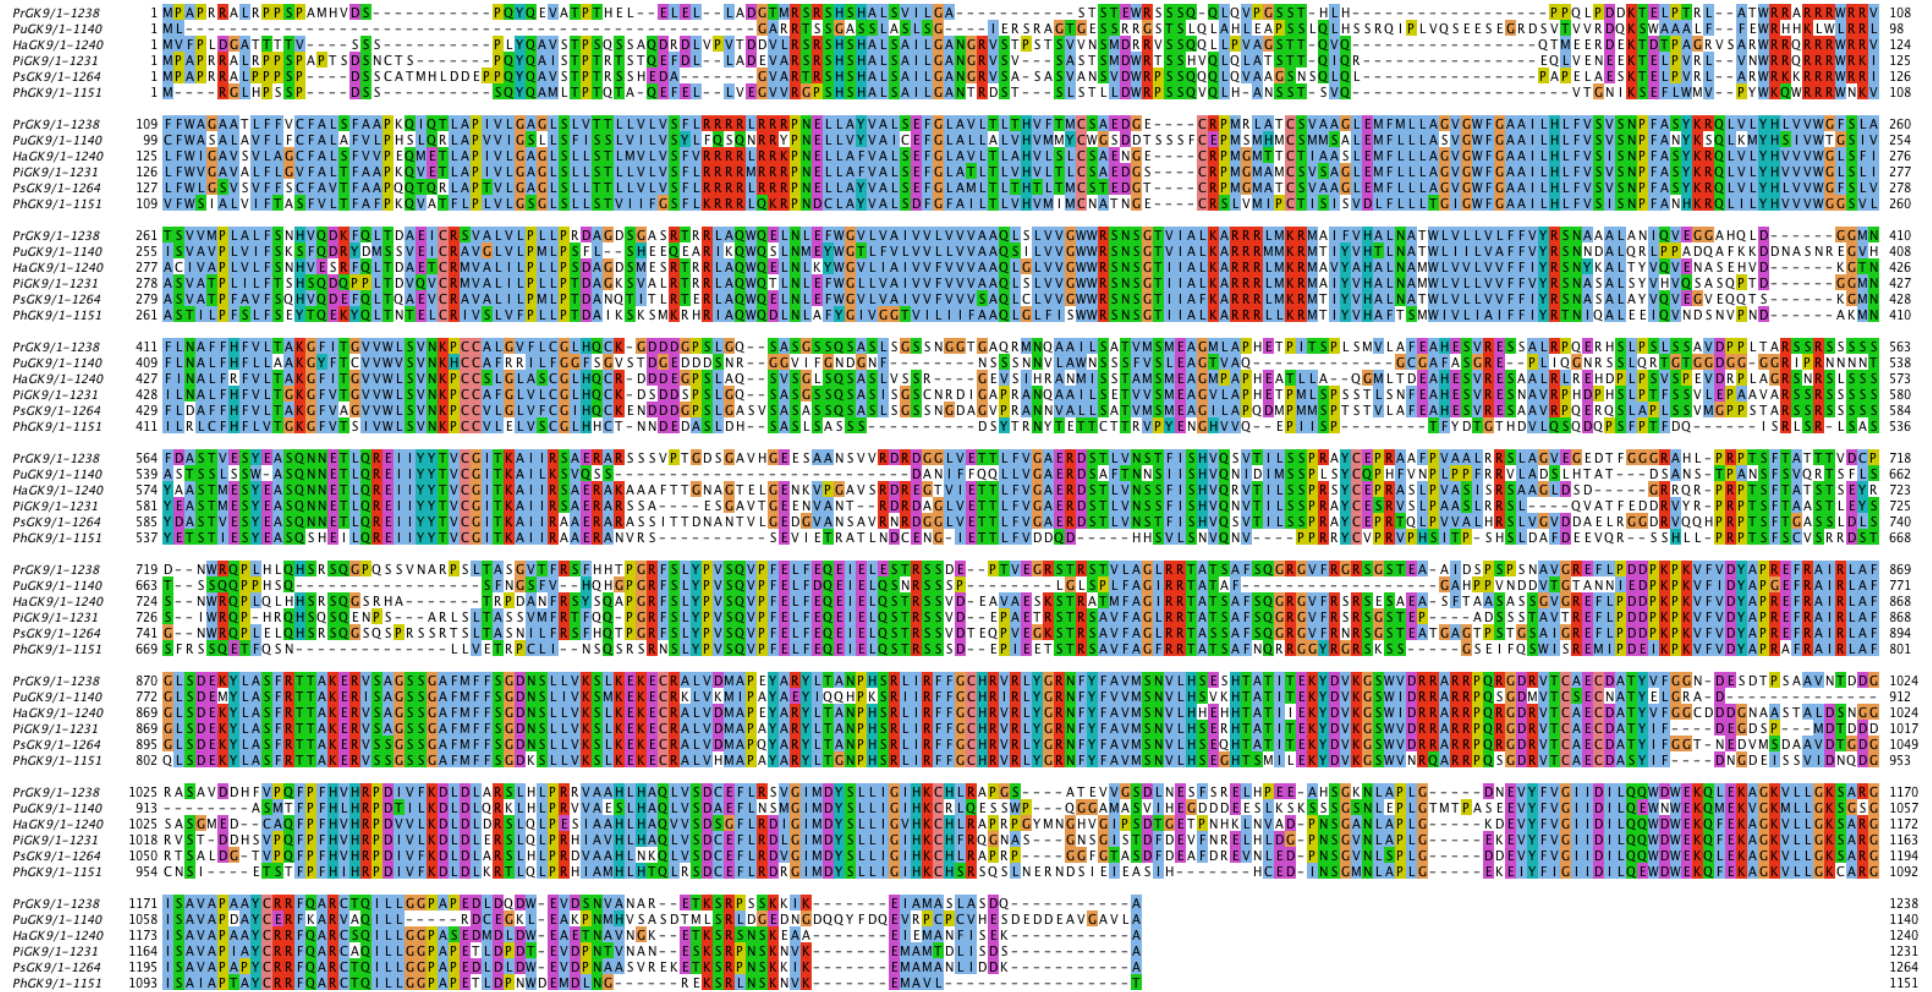

Supplementary Figure 7: Conservation of Gk9 in the oomycete genomes.

## Supplementary Figure 8

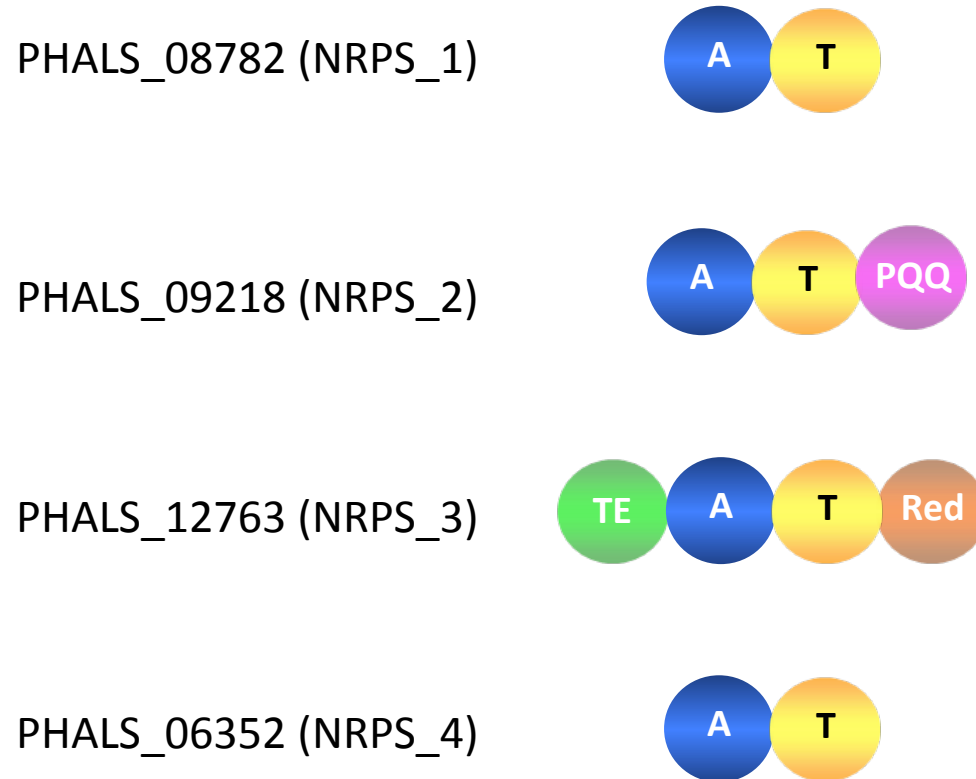

**Supplementary Figure 8:** Domain organisation of the NRPS encoded in the *P. halstedii* genome. Adelylation (A), thiolation (T), PQQ binding (PQQ), thioesterase (TE), and reductase (Red) domains are shown, which were identified by BLAST-P searches.

## Supplementary Figure 9

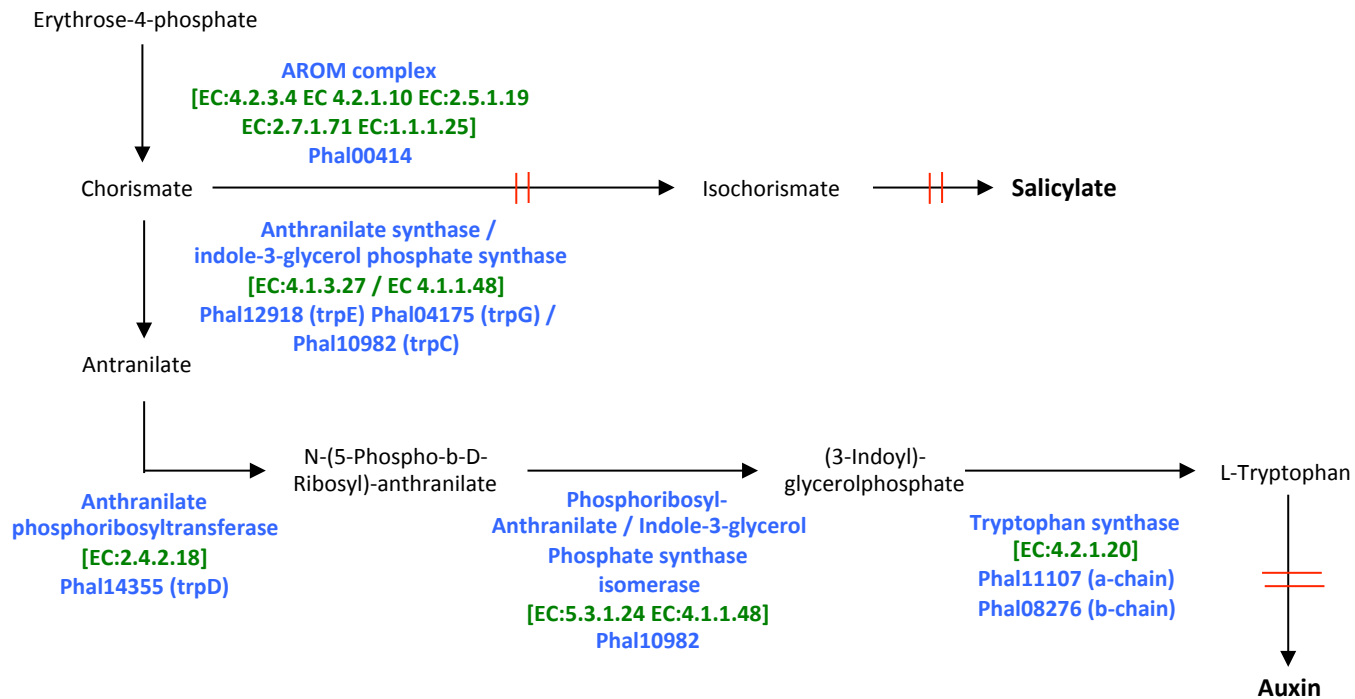

Supplementary Figure 9: Genes involved in the auxin production .

## Supplementary Figure 10

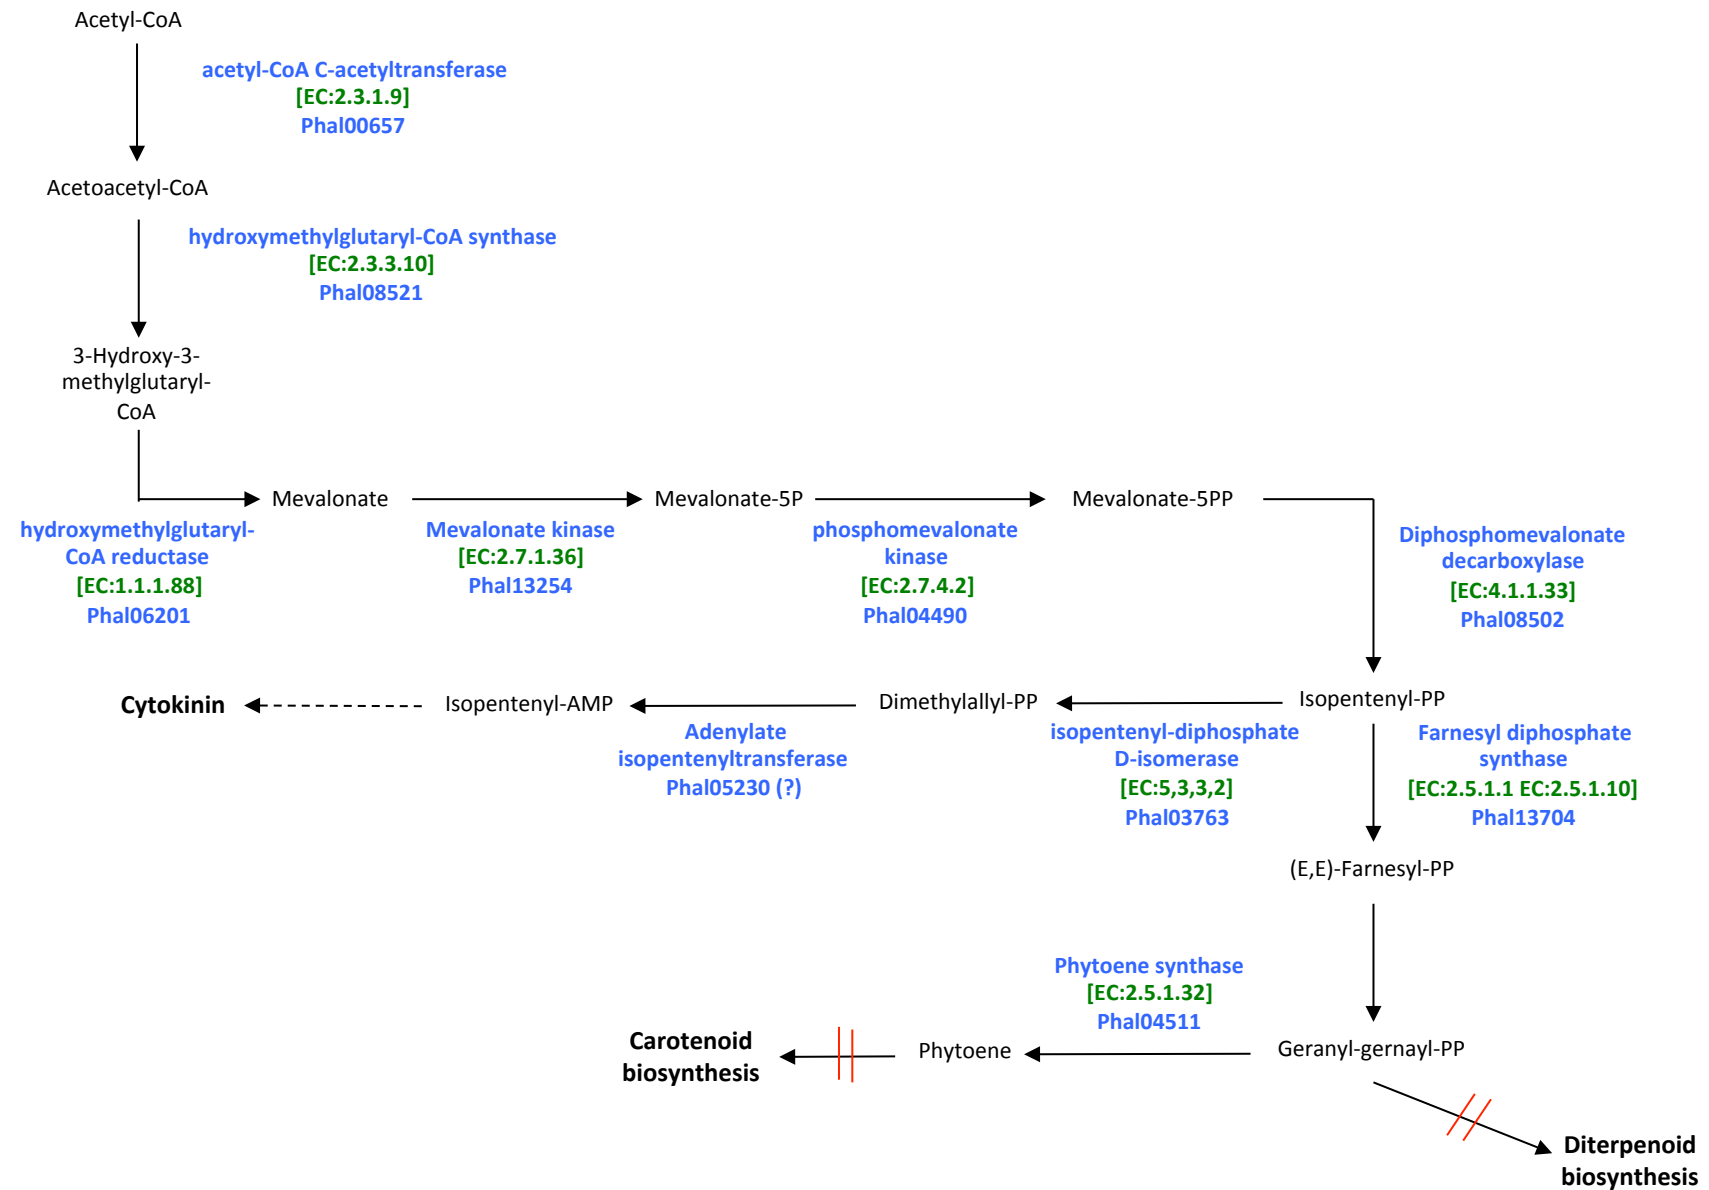

Supplementary Figure 10: Non-functional diterpenoid biosynthesis pathway.

## Supplementary Figure 11

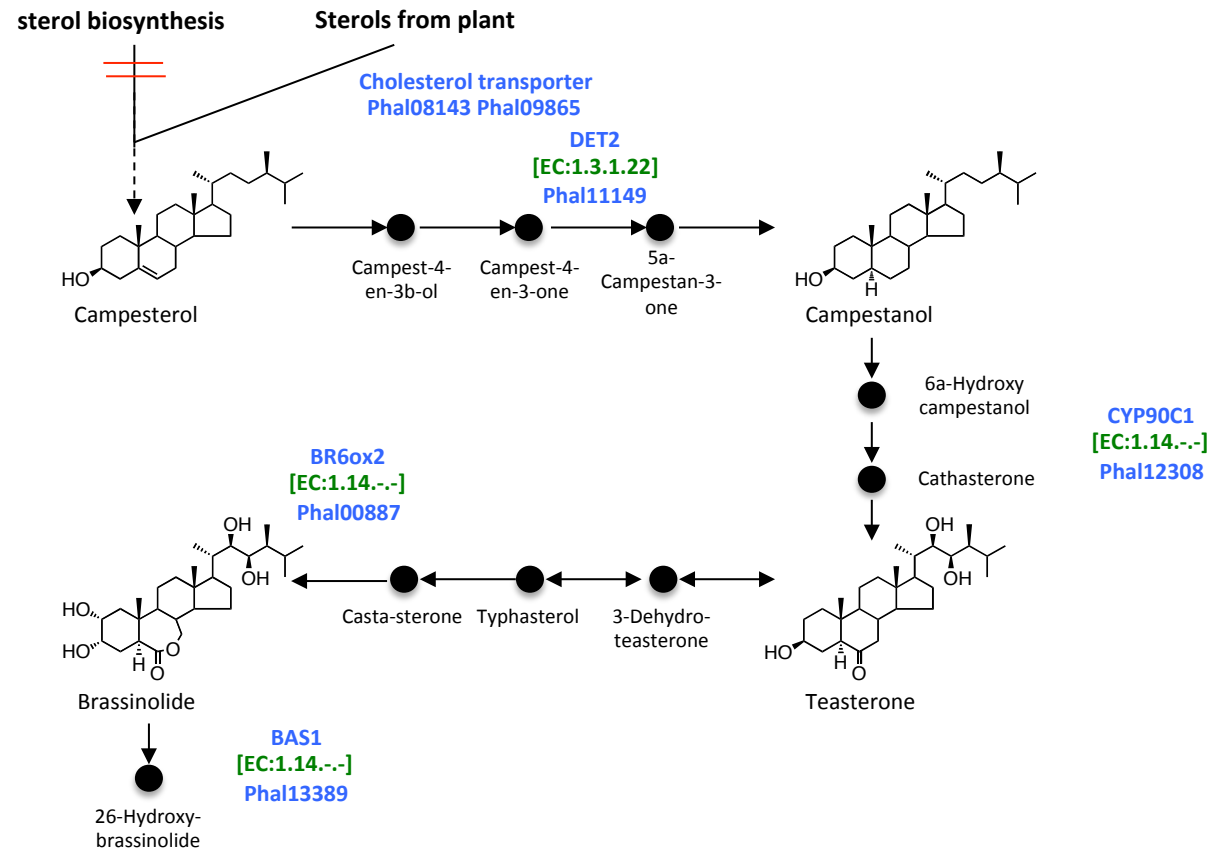

Supplementary Figure 11: Genes involved in the brassinolide biosynthesis pathway.

## Supplementary Figure 12

### Phal06084 aligned with HaNLP3 and NLPPya.

Signal peptide  
 Glutamines in Q-rich region  
 Conserved cysteines  
 Heptapeptide motif  
 Residues making up a cation binding pocket  
 Residues next to cation binding pocket

```

NLPPya      --MVRFVSALLLAAAGVLA--STN-----AAVINHDAVPVWPQPEPAD 39
HaNLP3      MKLDGFTTTAILAHIPVYARNDYVQEEKQQQLQEPDQWKPTTTGHDAIVFFSEPKPVT 60
Phal06084    MSIVSFFSFAVLMVSMIQAQTQENLKVTDQQEQLTADWQPKTIPYDQVRGFRQPKPTT 60
              : : * : : * : : * : : : : : : : : * : : : : * : :

NLPPya      ATQALAVRFKPQLDVVNGQPYPAVDPPQGNTSGGLKPSGSQAAA--R-DMSKAQVYSRSGT 98
HaNLP3      ISEKAGVKFKPLLDVNTGAPYAAVNAEGETSGGLQTSQDPESG--RGSKYGSQVYGRSTW 120
Phal06084    ISQQVALTFKPQLDIVTG--LPYPAVNRLGETSGGLPKDADTETK--HGSQFNSQVYGRSTW 120
              : : : : * * * : : * : : * : : * : : * : : * : : : : * : : : : * * :

NLPPya      YNGYYAIMYSWYMPKDSPTGIGHRHDWENVVWLDN--AASANIVALASASAHSGYKKSF 156
HaNLP3      YNDVHAIMYAWYFPKDSPLLMLGHRHDWENVVVFINDPDEVEPTILG--STSWHSGYIKYA 180
Phal06084    FNDVWVMMSWYFPKDSPPFLLGHRHDWENVVIFIDSPKVPLPKILG--SMSYHSEYIKFA 180
              : * : : : : * : : * : : * : : * : : * : : * : : * : : * : : * : :

NLPPya      PADKSYLDGITAKISYKSTWPLDHELGFSTTSAGKQQLIQWEQMTQAARDALESTDF--NA 216
HaNLP3      P--PTDSINGSSVMIKYHSFPLNHALNITKDAGAYQDLIMNHQMPDLARRALNDTDF--KA 240
Phal06084    P--PTFATNGTSVKVKYEDSFPLNHALNVTEKEGTFQDLIMWNQLPPIVRKSLNDTDF--SA 240
              * : : : : * : : * : : * : : * : : * : : * : : * : : * : : * : :

NLPPya      NVPEKS-NFQDKLVKAF-FQ----- 234
HaNLP3      ITPMNDLNFMEKIEAAWPFKTKKDGA 266
Phal06084    NVPMDWNFLKKVEEAWPFT----- 260
              : * : : : * : : * : : * : :
  
```

**Supplementary Figure 12:** Multiple alignment of the *Pythium aphanidermatum* NLPPya, the *Hyaloperonospora arabidopsidis* HaNLP3, and the *Plasmopara halstedii* Phal06084. Phal06084 and HaNLP3 both have a Q-rich region and all residues making up the cation-binding pocket. Phal06084 and HaNLP3 also both have an additional disulfide bridge, only found in one branch of a phylogenetic tree of oomycete NLPs.

# Supplementary Figure 13

|           |                                                                        |     |           |                                                                 |     |
|-----------|------------------------------------------------------------------------|-----|-----------|-----------------------------------------------------------------|-----|
| NLPFya    | --MVRFVSALLLAAAGVLAST--                                                | 19  | NLPFya    | -----NAAVINHDAVFVWPQPEPADATQALAVRFKPKQLDVVNG                    | 57  |
| Pha106162 | MSIGLLFRVLIACIITIQAKSSLENSDDNII PSKFHAGVTDWSILSPDTHDPRLENKG            | 60  | Pha106162 | IWTSILFIAPNPTTLASSPTFWIKQTMHRDKVVPFKQPKPVTVAEHAHVFKPKQINIVNG    | 300 |
| Pha106084 | MSIVSFFSFAVLMVSMIQAQTQNGEN                                             | 26  | Pha106084 | -----WQPKTIPYDQVRGRFQPKPTTISQQAVALTFKPKQLDIVTG                  | 78  |
| Pha114425 | MHLTTFLFGAVAVLATVRVDAYSFDLDEDDDKNKLIDSDDDKI--                          | 43  | Pha114425 | -----DYLDSKDDIKS                                                | 54  |
| Pha114424 | MRVRIILGLGAIATFLAAVHADANXXXXXXXKXXXXXX                                 | 37  | Pha114424 | -----DLFESDDGLST                                                | 48  |
| Pha113512 | MSPRAVFLGVIAIATSHGNAEWADAN                                             | 27  | Pha113512 | -----                                                           |     |
| Pha114423 | MSPRAVLLGAIATLVASHGFAKWADANVS                                          | 29  | Pha114423 | -----                                                           |     |
| Pha112600 | MGLRAIFFGGITITLATSILVKAHWINLNV                                         | 29  | Pha112600 | -----                                                           |     |
| Pha108480 | MTPRAFLLFGAITITLTSYANGYFVRSVD                                          | 29  | Pha108480 | -----                                                           |     |
| Pha113513 | MNSRALFLVLVALLASVRAN                                                   | 20  | Pha113513 | -----                                                           |     |
| Pha108947 | MFSTVLCAIAFFNLNADNGVQPVINKLQ                                           | 29  | Pha108947 | -----                                                           |     |
| Pha102474 | MLSTVLCAIAFFNLNADDELQPVINKLQ                                           | 29  | Pha102474 | -----                                                           |     |
| Pha108945 | MFLAVFCAIAFFNLNADDGVHPVINKFQ                                           | 29  | Pha108945 | -----                                                           |     |
| Pha103592 | MLSVVLFLVACINVAHADDEQRSSTHKLQ                                          | 29  | Pha103592 | -----                                                           |     |
| Pha105391 | MLSLVLFLVACFNVAHADDEQRSMIHKVQ                                          | 29  | Pha105391 | -----                                                           |     |
| Pha108445 | MRFAIFFLITLCSYAYANDGLEKKANKLF                                          | 29  | Pha108445 | -----                                                           |     |
| Pha108447 | --MRVLSICAAFLSCFVS--VTAQKVA                                            | 23  | Pha108447 | -----                                                           |     |
| Pha105247 | MNLWTLAGTLLAILRVCSAQKIDH                                               | 24  | Pha105247 | -----                                                           |     |
| Pha113274 | MHLWTLAGSLLAALVACSAGKIDH                                               | 24  | Pha113274 | -----                                                           |     |
| Pha101213 | MKVQAFPAVVLFAFLFVC-ATCVHP                                              | 23  | Pha101213 | -----                                                           |     |
| NLPFya    | -----GSKSEI IDDDVTPPELQVSVY GSKHTAESTVLTKDKVNSTENN IKRTIASNS SRETQFSDQ | 120 | NLPFya    | -----NAAVINHDAVFVWPQPEPADATQALAVRFKPKQLDVVNG                    | 57  |
| Pha106162 | -----LKVTDQQEQLTAD                                                     | 39  | Pha106162 | IWTSILFIAPNPTTLASSPTFWIKQTMHRDKVVPFKQPKPVTVAEHAHVFKPKQINIVNG    | 300 |
| Pha106084 | -----                                                                  |     | Pha106084 | -----WQPKTIPYDQVRGRFQPKPTTISQQAVALTFKPKQLDIVTG                  | 78  |
| Pha114425 | -----                                                                  |     | Pha114425 | GKSTNFPYVDDT PDSIDLQSDPSQIVFLGADSVHPFPRTKARTSSQKSALMFQFPQLYIEDG | 114 |
| Pha114424 | -----                                                                  |     | Pha114424 | DPDASGPGSDFIDPDPKANIVPVHSDADNVQPPFESKPCNDSTTALKYKPRLLITDG       | 108 |
| Pha113512 | -----                                                                  |     | Pha113512 | -----PFKQPTPTTDSQKSALIKYQPRLYVVD                                | 54  |
| Pha114423 | -----                                                                  |     | Pha114423 | -----KHSASRTIPDHYNFVNVEVQPFKQKPTTDSQKSALIKYQPRLYVVG             | 78  |
| Pha112600 | -----                                                                  |     | Pha112600 | -----VYPEKPGAVLISPTLMDVDEVPQFFQKPTTISQESALIKYKPRLYVDEG          | 78  |
| Pha108480 | -----                                                                  |     | Pha108480 | -----LDP-----IPDLIDANQVQPPFQFPQPKTQKSQSAVKYKPSLYIDS             | 70  |
| Pha113513 | -----                                                                  |     | Pha113513 | -----IAIDANVQPPFQKPTTDSERSALKYKPHLVSEG                          | 56  |
| Pha108947 | -----                                                                  |     | Pha108947 | -----YDKIKPFPATERDCPINEIALDFQPMRLIESG                           | 61  |
| Pha102474 | -----                                                                  |     | Pha102474 | -----YDKVKPFPATERDCPINEIALDFQPMRLIESG                           | 61  |
| Pha108945 | -----                                                                  |     | Pha108945 | -----YDKIKPFPVAKRDCRINEIALDFQPMRLIESG                           | 61  |
| Pha103592 | -----                                                                  |     | Pha103592 | -----YDEIKPIPGVESNSLINSIALHFQPMFLFISG                           | 61  |
| Pha105391 | -----                                                                  |     | Pha105391 | -----YDEIEFLPVVARDSLINSIALHFQPMFLFVSSG                          | 61  |
| Pha108445 | -----                                                                  |     | Pha108445 | -----YDSLVPVLPSPKPNCRINSIALQFQPELNIKHG                          | 61  |
| Pha108447 | -----                                                                  |     | Pha108447 | -----YDKARPFDEVKPDCLNELALMFQPLHTASG                             | 55  |
| Pha105247 | -----                                                                  |     | Pha105247 | -----DKIKPIEEHEAVNVTEKLAFRYKPSLAVTI                             | 55  |
| Pha113274 | -----                                                                  |     | Pha113274 | -----DKIKPIERQVTLTERLVFKFNPSMKIRE                               | 55  |
| Pha101213 | -----                                                                  |     | Pha101213 | -----DKIEPFPQPIPTCATQKLALYKPLLYTSMV                             | 54  |
| NLPFya    | -----                                                                  |     | NLPFya    | -----                                                           |     |
| Pha106162 | LFILSGQTVASLTIQSGKHINAVSLILSPVKVFNHGGNEGVS KTLTLGIGEHITSTE             | 180 | Pha106162 | -CQPYPAVD PQGNTSGGLKPSGSQAAAR-DMSKAQVYSRSGTYNG--YLAIMYSWYMPK    | 113 |
| Pha106084 | -----                                                                  |     | Pha106084 | -CHPYPAVNATGEISGGLKASGSDAGCKGSEYGSQVYGRSTWHRG--LWAIMYSWYFPK     | 357 |
| Pha114425 | -----                                                                  |     | Pha106084 | -CLPYPAVNRLGETSGGLPKDADTETCKHGSQFNSQVYGRSTWFND--VWVMFESWYFPK    | 135 |
| Pha114424 | -----                                                                  |     | Pha114425 | -CHPYPAVQSNGLNAGLEYELFRDPTCEGSPGSGVYSRSSWYQM--KWATIYTWYFPV      | 171 |
| Pha113512 | -----                                                                  |     | Pha114424 | -CHPYPAVQSDGAVSAGFEWSRFRNHPCEGSPGSGVYARSSWYED--KWAMVYVWYFPM     | 165 |
| Pha114423 | -----                                                                  |     | Pha113512 | -CYPYPAVQANGSLSYGLPWEVFAPTKONGSPYGSQIYSRSDWYRG--MWAIMYAWYLP     | 111 |
| Pha112600 | -----                                                                  |     | Pha114423 | -CYPYPAVQADGSLSEGLPWKIFFQSRONGSPRGSQIYSRSDWYRG--KWAIMYAWYLP     | 135 |
| Pha108480 | -----                                                                  |     | Pha112600 | -CHPYPAVQENGSLSEGMQWKNYFRPSCGSPRGSQIYSRSDWYQG--KWAMLYTWYLP      | 135 |
| Pha113513 | -----                                                                  |     | Pha108480 | -CHPYPAVQANGSLSSGVEWKHNFRASCRGSPGSGVYSRSDWYKG--KWAIMYTWYFP      | 127 |
| Pha108947 | -----                                                                  |     | Pha113513 | -CHPYPAVQNGSVSAGFEWDEYSQPCGRSPGSGQIYSRSSWYKG--KWAIMYAWYFPK      | 113 |
| Pha102474 | -----                                                                  |     | Pha108947 | -CHPYPAVDENGYISDGLGVSHWFTD-CLGSPGSGVYGRAHVYKG--YLAIMYAWYFPK     | 117 |
| Pha108945 | -----                                                                  |     | Pha102474 | -CHPYPAVDKNGYISDGLGVSHWFTD-CGSPGSGVYGRAHVYKG--YLAIMYAWYFPK      | 117 |
| Pha103592 | -----                                                                  |     | Pha108945 | -CHPYPAVDKNGYISDGLGVSHWFTD-CGSPGSGVYGRAHVYKG--YLAIMYAWYFPK      | 117 |
| Pha105391 | -----                                                                  |     | Pha103592 | -CHPYPAVDKNGYISDGLGVSHWFTD-CGSPGSGVYGRAHVYKG--YLAIMYAWYFPK      | 117 |
| Pha108445 | -----                                                                  |     | Pha105391 | -CHPYPAVDKNGYISDGLGVSHWFTD-CGSPGSGVYGRAHVYKG--YLAIMYAWYFPK      | 117 |
| Pha108447 | -----                                                                  |     | Pha108445 | -CHPYPAVDKNGYISDGLGVSHWFTD-CGSPGSGVYGRAHVYKG--YLAIMYAWYFPK      | 117 |
| Pha105247 | -----                                                                  |     | Pha108447 | -CHPYPAVDKNGYISDGLGVSHWFTD-CGSPGSGVYGRAHVYKG--YLAIMYAWYFPK      | 117 |
| Pha113274 | -----                                                                  |     | Pha105247 | LCAGYPAVDSDGNFSGGLKPTNGNNG-CTNPFPGSGVYVIRIKKYD--LWAIMYVWYFPK    | 112 |
| Pha101213 | -----                                                                  |     | Pha113274 | LCVDYPAVDADGNFSGGLKPTNGNNG-CERPFMDSGVYVIRIKKYD--LWAIMYVWYFPK    | 112 |
|           |                                                                        |     | Pha101213 | VCVPYAAVDADGEVSDGLKGSNGNDG-CTYARHGSQIYGRIGSYEN--LSAIMYAWYFPK    | 111 |
|           |                                                                        |     |           | * * * * *                                                       |     |

## Supplementary Figure 13

|            |                                                                |     |
|------------|----------------------------------------------------------------|-----|
| NLPPya     | D---SPSTGICRRHDWENVVVWLDN--AASANIVALASASA-HSGYKKSFPADKSYLDGIT  | 167 |
| Phal06162  | D---TAFPLLCHRRDWEHIIIVWIDNPSLYKPRILAVASSA-HSWYTFVQSPHPTDRVNGTS | 413 |
| Phal06084  | D---SPFELLCHRRDWEENVVIFIDSPKVLPLKILGCSMSY-HSEYIKFAPCPTEFATNGTS | 191 |
| Phal114425 | AYDHASPFSTGRRHYWLWAIWVTTDENPAEGHFLAVSMG-NFGISSYTLPHKHLVNGT     | 230 |
| Phal114424 | ALDSVSTFVRGRRHYWLWAIWVTSGDPDPESTFLGVSMG-DHGITKQLRPKSKYVFNET    | 224 |
| Phal113512 | ALDHSSWLVDGRRHFWTFVVVWNTSPDPNVSTILAASSTGTDNRIRKYLFPVKSXYLDNR   | 171 |
| Phal114423 | ALDQNIWDVDGCHSHFWTFVVVWNTSDPDVSTILAASSTGVGNRIKKYSPLKSKYLLNHK   | 195 |
| Phal112600 | ALDSTAWFVDGRRHFWLWVVIWNTSDPDDDSTILAASMSGFGDEIKKYAPLKSXYLIHDK   | 195 |
| Phal108480 | ALDPTTQFVS---HWLWAIWNTSDPDDESTLLAVTLPLRLADGVKKYSPLHKSXYVNHNT   | 183 |
| Phal113513 | AAVHIGRGVSCRRHYWLHAIWVTDEENPNSSILGVTMSA-GIGLLKRTKIKSHYIIGGT    | 172 |
| Phal08947  | DFMTTFYFV-CHRHGWEHAILWIGG-SSEDAVLLAASVES-TLSYDTYNPVPSPKYMKGDH  | 174 |
| Phal02474  | DFMTTFYFV-CHRHGWEHAILWIEG-SSEDAVLLAASVES-TLSYDTYAPVPSPKYMKSDH  | 174 |
| Phal08945  | DFMVTFFYV-CHRHGWEHAILWIGG-STEDPVFLAATVES-TFGYKKYSVPVTKYVKS DH  | 174 |
| Phal03592  | DFMTAPFYI-CHRHGWEHAILWFGP-DTENPTLLAVTVES-TFGYKTYAPFPSPKYMKGDH  | 174 |
| Phal105391 | DFMSAPFYI-CHRHGWEHAIWFVGA-YRKNPRLLAVTVES-TFGYKTYAPFPSENMMHGDH  | 174 |
| Phal108445 | DYVATPFWI-CHRHGWEHAILWFGG-MTEKPELLAVTAKS-LIGYRTYAPFQSKHMDKDR   | 174 |
| Phal108447 | DTMTTFVYI-CHNHGWEHAIYVIGV-SSDTPKLLAVAASG-MWSYRTYNPFRSDYVSGNS   | 170 |
| Phal05247  | R---FTSLWPKARHDWEQVVIWIDELT-ETPNVKLVASGYDDYSKFVPKKSVD SGPTFL   | 168 |
| Phal113274 | R---FQSGWPSARHDWEQAVVWFDDLK-ENPYVVSVATSRGGKYLFFNP SHETTYGPFLH  | 168 |
| Phal101213 | R---FWLGFPQRRHDWKS VVVWLDLKSMTPTIVAVSMAKSDTRYKTVTKLDLND FARLQ  | 168 |
|            | * : : :                                                        |     |
| NLPPya     | --AKISYKSTWPLDHELGF TTS-----AGKQQLIQWEQMTQAARDALE--STDFG       | 214 |
| Phal06162  | --VKVKYAGIWFNLHALTSTTK-----SGEYQDLIMWEQLTEAARQSLQ--QANFG       | 460 |
| Phal06084  | --VKVKYEDSFLNHALNVTEK-----EGTFQDLIMWNQLPPIVRKSLN--D TDFG       | 238 |
| Phal114425 | TVLLKSHKSLMSARLALDLTEK-----SKEKEDLITWEELTPEARAALSSVKRTEA       | 281 |
| Phal114424 | TVLLKSHGFFSTRQGLELTKK-----SGGTQNLVTDWQLTPEARTSLSSLFRTEV        | 275 |
| Phal113512 | TLKVKLYQNYWLDKLTGLKLTDK-----VGDLQPLITWEQLTDEARAALSSFHYPDW      | 222 |
| Phal114423 | SLKVKLHENHFWDKTGLKLTKEK-----VGELQTLITWEQLTDEARAALSSVHYSDW      | 246 |
| Phal112600 | TLKVKSTESRIKKKHGLELTKR-----VGEFQDLITWEQLSDEARAALSNFHRLEK       | 246 |
| Phal108480 | TVKIKSQSFWLKMHGFE LTR-----SGEFQDLITLDQLTDEAKAALMTNHRPEH        | 234 |
| Phal113513 | TLKILMSVVSFWGRRLALKFTVK-----LGETQDLITWEQLSHEARKALA----LDY      | 219 |
| Phal08947  | --VKLEYTWLGVTHHYLTATKE-----SGEFQDLVMWDNMTENAHISLN--EKVSL       | 221 |
| Phal02474  | --IKLEYTWLGVTHHYLTATKE-----SGEFQDLVMWDNLTENAHKSLN--EKVSL       | 221 |
| Phal08945  | --FKLEYTWLGVTHHYLTATKN-----MGEFQDLVMWNLTDEARVSLN--EKISL        | 221 |
| Phal03592  | --FKLKYTWLGVTHHYLTATEK-----SGEFQDLIMWD CMD EHVRS LN--HKVSH     | 221 |
| Phal105391 | --FKLEYTTLIVTHHYLTASER-----TGEFQNLVMWN SMNERARYSLN--HKVSH      | 221 |
| Phal108445 | --FKLKYTWMGVTQHLYLSATTS-----PGELQSLVMWDDLDPKARASLK--PRSW       | 221 |
| Phal108447 | --FKLKYTWIGISHHYLYKGTHN-----PGEFQFLIMWENMTSSVRHLFQ--EKTWF      | 217 |
| Phal05247  | LRVETFGF-PSLTITFFPEDYN----LLDYS SPYY--IILWEQLPEPARAALSD-DNNFG  | 220 |
| Phal113274 | FFPNYFGA-PTLIRSYFVKWK----FYKEHFRYY--IVMWEQLPEPARAALSD-DKNFG    | 220 |
| Phal101213 | VGSNVVISNTSLRFYEFEGFLRSNIRLTGHNQYQKLLIWDQLTDFARDALNE-DSNFG     | 227 |
|            | : : : : : : :                                                  |     |
| NLPPya     | NANVPFKS-NFQDKLVKAFFQ-----234                                  |     |
| Phal06162  | MANVPMRDGNFLDKLDTAWS FARLRIQT-----488                          |     |
| Phal06084  | SANVPMNDWNFLKKVVEAWFFT-----260                                 |     |
| Phal114425 | TANSPFLQDNKFFSLLEKAYPW-----302                                 |     |
| Phal114424 | TANPFLQDRQYFDILKKAYLW-----296                                  |     |
| Phal113512 | RMETFIQDKWFRYMLSSAYPF-----243                                  |     |
| Phal114423 | RMSPIQDKWFRPMLSSAYPF-----267                                   |     |
| Phal112600 | RANPFIQDKLFYEVLEKSYPF-----267                                  |     |
| Phal108480 | FANPFLQDLRFNEVLQMAFPF-----255                                  |     |
| Phal113513 | KSDTFLQDYRFDGLIKEAYPF-----240                                  |     |
| Phal08947  | NFNSPLSDKRFFKALLKSYPF-----242                                  |     |
| Phal02474  | NFDSPLSDKRFFKALRKSYPF-----242                                  |     |
| Phal08945  | NFNSPLSDKRFFALRKSYPF-----242                                   |     |
| Phal03592  | NFDFPIRDDRFFHALRKSFPF-----242                                  |     |
| Phal105391 | NFDFPIRDERFFHALRNSFPF-----242                                  |     |
| Phal108445 | HFKFPLADNRF FRALRKAYPF-----242                                 |     |
| Phal108447 | GTKAFFSDDNF FKHKKARPFYHRT-----242                              |     |
| Phal05247  | DAKFFLRDDQIDQHLEKAYQTEDE NEDR---249                            |     |
| Phal113274 | DAKCFIRDDKIDHLEKAYLTD AERKQKPSK252                             |     |
| Phal101213 | SAVVFPFNDNQFKDHLQEA YPLEKV-----251                             |     |
|            | * : . : :                                                      |     |

| Legend                        |
|-------------------------------|
| Signal peptide                |
| Bad signal peptide            |
| Heptapeptide motif            |
| Conserved cysteine            |
| Kation binding pocket         |
| Next to kation binding pocket |

**Supplementary Figure 13:** Multiple alignment of the *Pythium aphanidermatum* NLPPya and all *Plasmopara halstedii* NLPs. The *Pl. halstedii* genome only encodes two NLPs that contain a complete cation-binding pocket. 17 out of the 19 PhalNLPs contain a functional (D-score>0.45) signal peptide, suggesting they are secreted. Phal06162 contains a 240 aa domain between the signal peptide and the start of the NEP1 domain, a feature not uncommon in this group of NLPs.

## Supplementary Figure 14

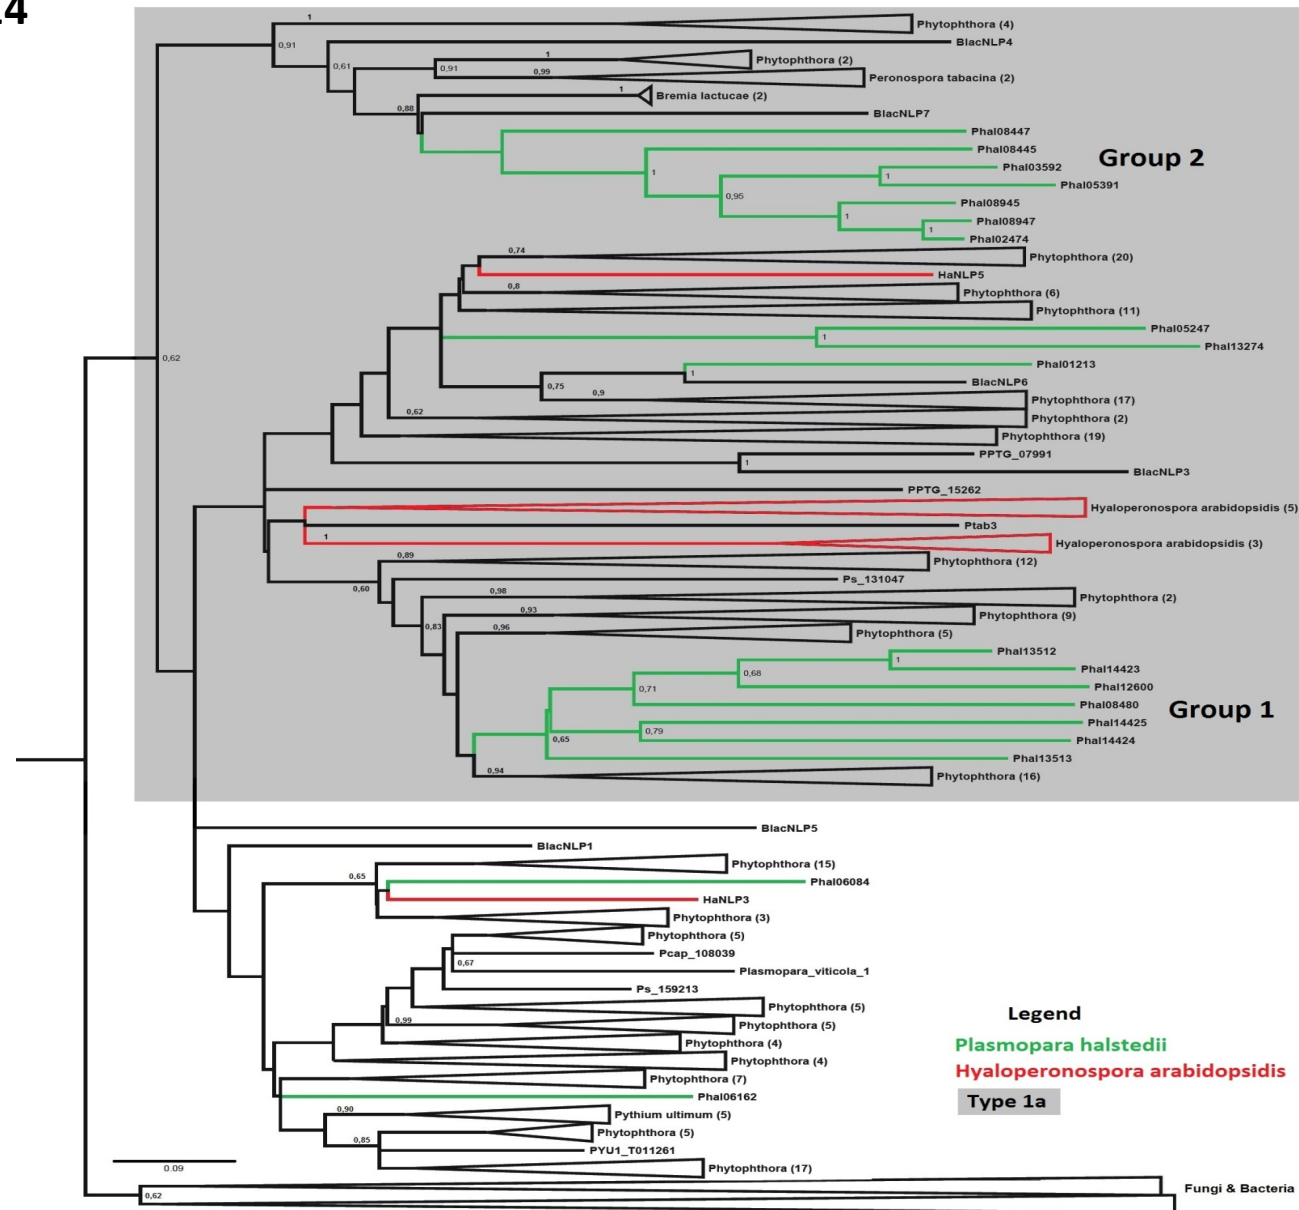

**Supplementary Figure 14:** Phylogeny of the 19 PhalNLPs compared with 378 type 1 NLPs of 91 different species (53). Neighbor Joining tree (Mega5, 100 Bootstraps). All signal peptides were removed before alignment. Only bootstrap values >0.6 are shown. 17 of the 19 PhalNLPs are of Type 1a, lacking the acidic cation binding pocket required for induction of necrosis. Two species-specific expansions can be observed, which were named group 1 and group 2. The type 1 NLP Phal06084 clusters together with the well-studied HaNLP3 (54).

## Supplementary Figure 15

*PhalPseudoNLP1* aligned with its closed relative (*Phal14423*)

```

Phal14423      ATGAGCCACGTCGCCGTTCTTCGCGAGCAATTGCTATCCTTGTTCATCCCATGGCTTT 60
PhalPseudoNLP1 ATGAGCTCTCGCGCCATGCTTCTCGGAATTATTGCCATCTTTGCTGCTTCCTATGGTATA 60
***** *:* *:* *:* *:* *:* *:* *:* *:* *:* *:* *:* *:* *:* *:* *:*

Phal14423      GCGAAATGGGCTGACGCTAACGCTCTCGAAACACTCAGCAAAGTCACGAACCATTCCTGAC 120
PhalPseudoNLP1 GTGGAAAGGGCTGACGCTGATGTATCTGTACACCCAGAAG-----CTATCTCTCTAC 111
* *:* *:* *:* *:* *:* *:* *:* *:* *:* *:* *:* *:* *:* *:* *:*

Phal14423      CATTACAACCTTGTAAATGTCAACGAAGTGCAGCCATTAAACAGCGTAAACCACTACG 180
PhalPseudoNLP1 CATTACAACCTTATAAATGTCAACGCAAGTGCAGCCCTTAAACAGCGTAAACCGACGACA 171
***** *:* *:* *:* *:* *:* *:* *:* *:* *:* *:* *:* *:* *:* *:* *:*

Phal14423      GATTCTCAGAAATCTGCGATCAAGTACCAACACCGGCTTTACGTATTGGGTGCATGTTAT 240
PhalPseudoNLP1 GATTCTCAAAGATCTGCCATTAAATACCAACACCGGCTTTCCATTTCGAGCCGATGTCAT 231
***** *:* *:* *:* *:* *:* *:* *:* *:* *:* *:* *:* *:* *:* *:* *:*

Phal14423      CCATATCCTGCAAGTGCAGGCGGATGGATCACTAAGTGAAGGACTTCCCTGGAAATCTTC 300
PhalPseudoNLP1 CCATATCCTGCAAGTGCAGGCGAATGGGTCACTAAATGAGGGACTTCCCTGGAAAGTCTTC 291
***** *:* *:* *:* *:* *:* *:* *:* *:* *:* *:* *:* *:* *:* *:* *:*

Phal14423      TTTCACTCTCGATGTAATGGATCTCCCGCGGTTCCCAAATTTACTCGCGATCCGATTGG 360
PhalPseudoNLP1 ---CAGTATCGATGTCATGGATCTCCCGCGGTTCTCAAATTTACTCGCGATCCGATTGG 348
***** *:* *:* *:* *:* *:* *:* *:* *:* *:* *:* *:* *:* *:* *:* *:*

Phal14423      TACCGAGGCAAGTGGGCCATTATGTACGCGTGGTACCTTCCGAGAGCCCTGGACCAAAAC 420
PhalPseudoNLP1 TACCGAGGCAAGTGGGCCATTATGTACGCGTGGTACCTTCCGAGGCTTGGACCAAACT 408
***** *:* *:* *:* *:* *:* *:* *:* *:* *:* *:* *:* *:* *:* *:* *:*

Phal14423      ATCTGGATGTTGACGGCCATAGTCACTTTTGGACCTTTGTCGTTGTCGGACAGACAGC 480
PhalPseudoNLP1 AACTGGTTGGTTGACGGCCATTGTCACTTTTGGACCTGGGTCGTTGTCGGACAGACAGC 468
***** *:* *:* *:* *:* *:* *:* *:* *:* *:* *:* *:* *:* *:* *:* *:*

Phal14423      CCGGATCCGGATGTCCTCGACTATTCTCGCTGCATCAACCTCTGGTGTGGCAACAGAATT 540
PhalPseudoNLP1 CCTGATCCGAATGTCCTCGACCTTCTCGCTGGATCAACAGCTGGCATCGGCGACAAATC 528
** *:* *:* *:* *:* *:* *:* *:* *:* *:* *:* *:* *:* *:* *:* *:*

Phal14423      AAAAAATATTCACTCAAGTCAAGTATCTTCTTAACCAAGTCTTTGAAGGTCAAG 600
PhalPseudoNLP1 AAGAAATACCTACCTAGAGTCAAGTATCTTCTTGACAACAAGTCTTTGAAGGTCAAA 588
** *:* *:* *:* *:* *:* *:* *:* *:* *:* *:* *:* *:* *:* *:* *:*

Phal14423      CTACACGAAATCATTTTGGGATAAGACTGGACTCAAGCTGACGAAAAAGTTGGTGAG 660
PhalPseudoNLP1 ACACATGAAAGTTATTTATGGAAGAGGACTGGAGTCAAGGTTACCGAAAAAGTCGGT--A 646
. *:* *:* *:* *:* *:* *:* *:* *:* *:* *:* *:* *:* *:* *:* *:*

Phal14423      TTGCAGACTCTCATAACTTGGGAGCAGCTTACAGATGAGGCTCGAGCAGCGCTATCTTCT 720
PhalPseudoNLP1 CTGCAGACTCTCATTACTTGGGAGCAGCTTACAGATGAGGCTCGAACAGCGCTATCATCT 706
***** *:* *:* *:* *:* *:* *:* *:* *:* *:* *:* *:* *:* *:* *:* *:*

Phal14423      GTTCATTACTCTGATTGGCGTATGGAGTCGCCAATTCAAGACAAGTGGTTTCGTCCAATG 780
PhalPseudoNLP1 TAGCATTACCGTATTTGGCGTATGGAGTCGCCGATTCAAAACAAGCGTTTAAATCGGACG 766
: *:* *:* *:* *:* *:* *:* *:* *:* *:* *:* *:* *:* *:* *:* *:*

Phal14423      CTAAGTAGTGCTTATCCATTTAG 804
PhalPseudoNLP1 CTGAAAGCTGCTTATCCATTCTAG 790
** *:* *:* *:* *:* *:* *:* *:* *:* *:* *:* *:* *:* *:* *:* *:*

```

**Supplementary Figure 15:** Multiple alignment of *PhalPseudoNLP1* and its closest relative *Phal14423*. *PhalPseudoNLP1* encodes a premature stop codon at position 337-339 (indicated in Bold).

## Supplementary Figure 16

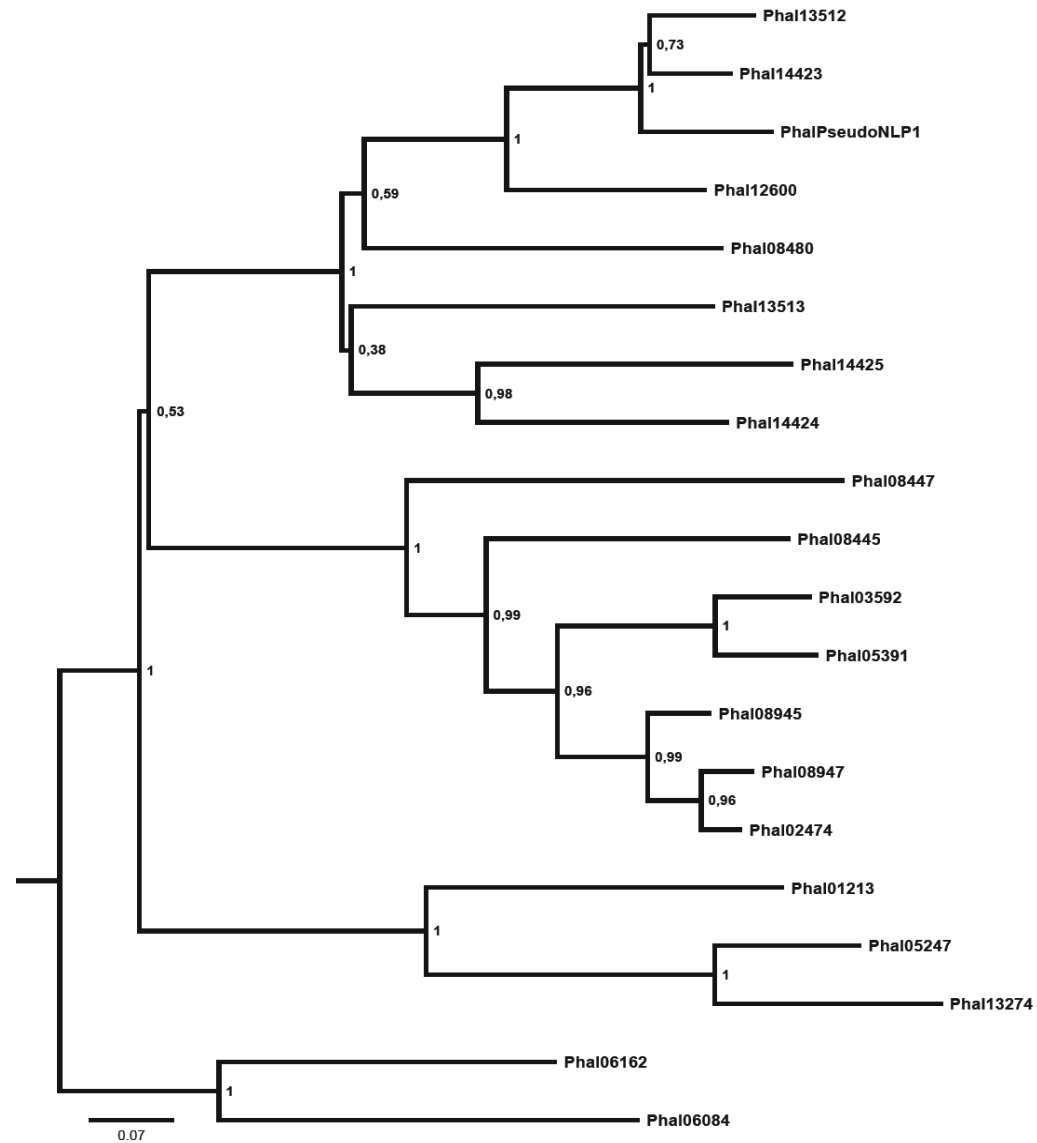

**Supplementary Figure 16:** DNA-based Maximum Likelihood tree of all PhalNLP genes, including the pseudogene. The tree is made using Mega5 (100 bootstraps).

Supplementary Figure 17

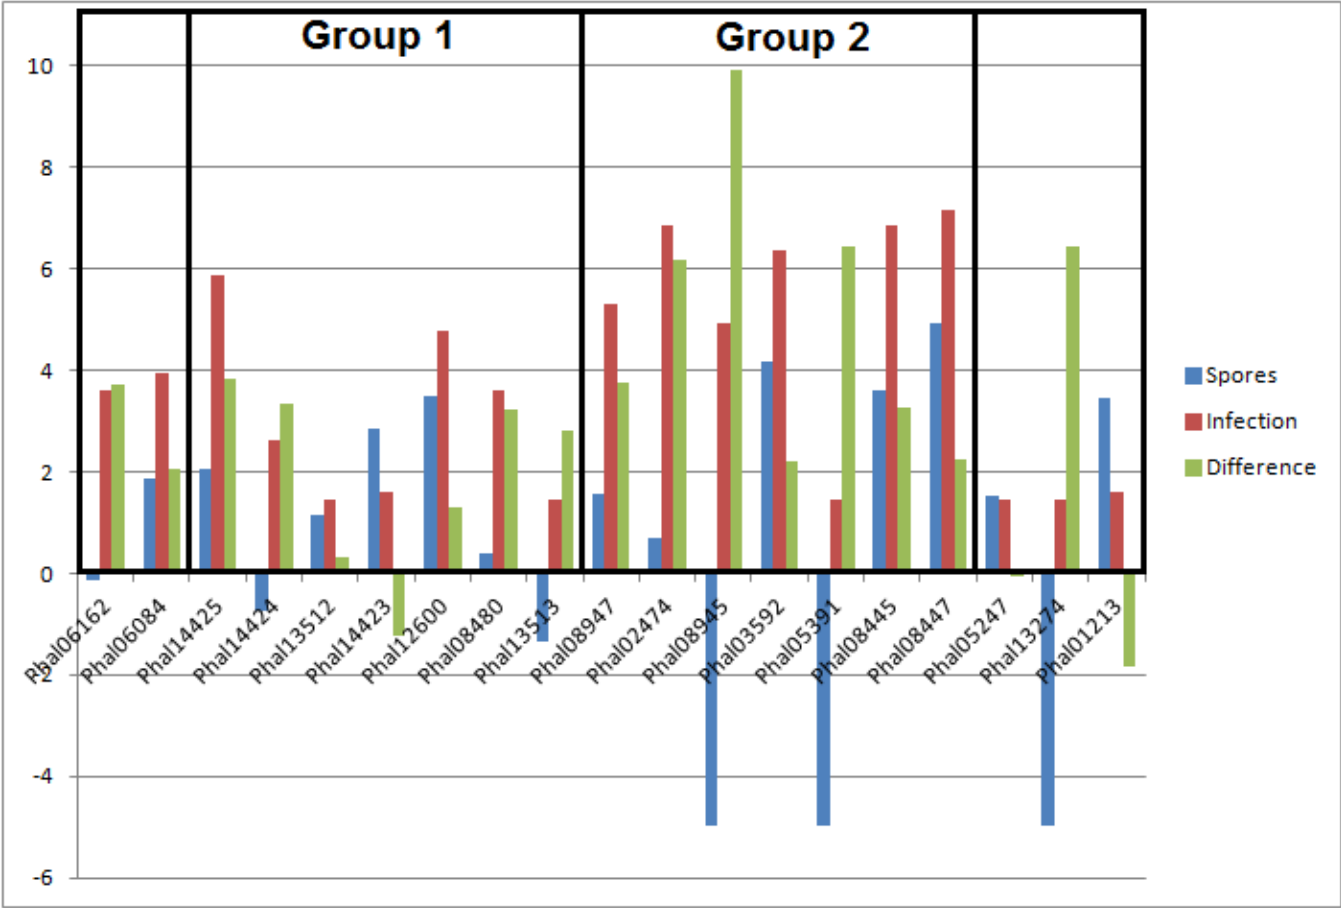

**Supplementary Figure 17:** Expression of the PhalNLPs in two different developmental stages. For clarity, the difference, and thus the total up- or down-regulation is included. Values have been derived from the RNA-seq expression profiling (See methods).

[illegible]

**Supplementary Figure 18:** Sequence alignment of Kazal-like domains from seven pathogenic oomycetes. Multiple sequence alignment of 169 Kazal-like domains of seven pathogenic oomycetes. Out of the 169 oomycete Kazal-domains of oomycetes, 60 are from *Phytophthora infestans* (Pi), 37 are from *Pythium ultimum* (Pu), 4 are from *Hyaloperonospora arabidopsidis* (Ha), 8 are from *Albugo laibachii* (Al), 25 are from *Saprolegnia parasitica* (Sp), 30 are from *Plasmopara halstedii* (Ph) and 5 are from *Aphanomyces euteiches* (Ae). The alignment also includes 8 additional known Kazal-like domains present in 2 serine protease inhibitors from crayfish and a protozoan parasite species, respectively. Out of the 8 additional Kazal-like inhibitors, 4 are from the crayfish *Pacifastus leniusculus* (PAPI-1\_d1-d2, CAA56043) and 4 from the apicomplexan protozoan parasite *Toxoplasma gondii* (PI-1\_d1-d2, AF121778). The amino acid residues that defined the Kazal-like family protease inhibitor domain are marked with asterisks (bottom). The conserved cysteines and their position are numbered in the alignment (top). Cysteine positions three and six shown in grey are missing in some protease inhibitors domains of *P. infestans*. The first suffix indicates the number of the Kazal-like domain from left to right of the C-terminal effector domain in multidomain proteins. The second suffix indicates the P1 amino acid active residue, which is the central to the specificity of Kazal-like inhibitors. The third suffix “NS” when present indicate protease inhibitor domains from proteins that are not predicted to be secreted.



**Supplementary Figure 19. Sequence alignment of cystatin-like domains of seven pathogenic oomycetes.**

Multiple sequence alignment of 38 cystatin-like domains present in 30 cysteine protease inhibitors (EPICs) of seven pathogenic oomycetes. Out of the 38 oomycete cystatin-like domains, 8 are from *Phytophthora infestans* (Pi), 6 are from *Pythium ultimum* (Pu), 4 are from *Hyaloperonospora arabidopsidis* (Ha), 4 are from *Albugo laibachii* (Al), 9 are from *Saprolegnia parasitica* (Sp), 1 is from *Plasmopara halstedii* (Ph) and 6 are from *Aphanomyces euteiches* (Ae). The alignment also includes 6 cystatin-like domains present in 6 cysteine protease inhibitors from plants (*Carica papaya* Cp Cystatin gi|311505), from animals (insect *Sarcophaga peregrina* Sp\_Sarcocystatin gi|399335, chicken Gg\_Cystatin P01038, mouse Mm\_Cystatin gi|6226846 Mm\_Kininogen gi|12643495, human Hs\_Chain A gi|14278690). The proposed active-site residues in cystatins, including the N-terminal trunk (NT), first binding loop (L1) and second binding loop (L2) are indicated in the sequence with a bar (top). The amino acids that define cystatins are marked with asterisks (bottom). The first suffix indicates the number of the cystatin-like domain from left to right of the C-terminal effector domain in multidomain proteins. The second suffix “NS” was added to protease inhibitor domains from proteins that were not predicted to be secreted.

## Supplementary Figure 20

| CRN predictions on the ORFs of <i>Pl. halstedii</i> genome              | BlastP                                                     | 476     |
|-------------------------------------------------------------------------|------------------------------------------------------------|---------|
|                                                                         | BlastP+HMM (full length/Haas)                              | 200/139 |
|                                                                         | BlastP + Both HMM                                          | 125     |
|                                                                         | BlastP + Both HMM + SignalP v4 (Probability: 0.6)          | 33      |
|                                                                         | BlastP + Both HMM + Manual                                 | 55      |
|                                                                         | BlastP + Both HMM + Manual + SignalP v4 (Probability: 0.6) | 16      |
| CRN predictions on the protein sequences of <i>Pl. halstedii</i> genome | Constructing <i>Pl. halstedii</i> CRNs HMM                 | 49      |
|                                                                         | Total non-overlapping CRNs in <i>Pl. halstedii</i> genome  | 77      |

**Supplementary Figure 20:** Table is representing the number of candidate CRNs predicted in the current study.

**Supplementary Figure 21**

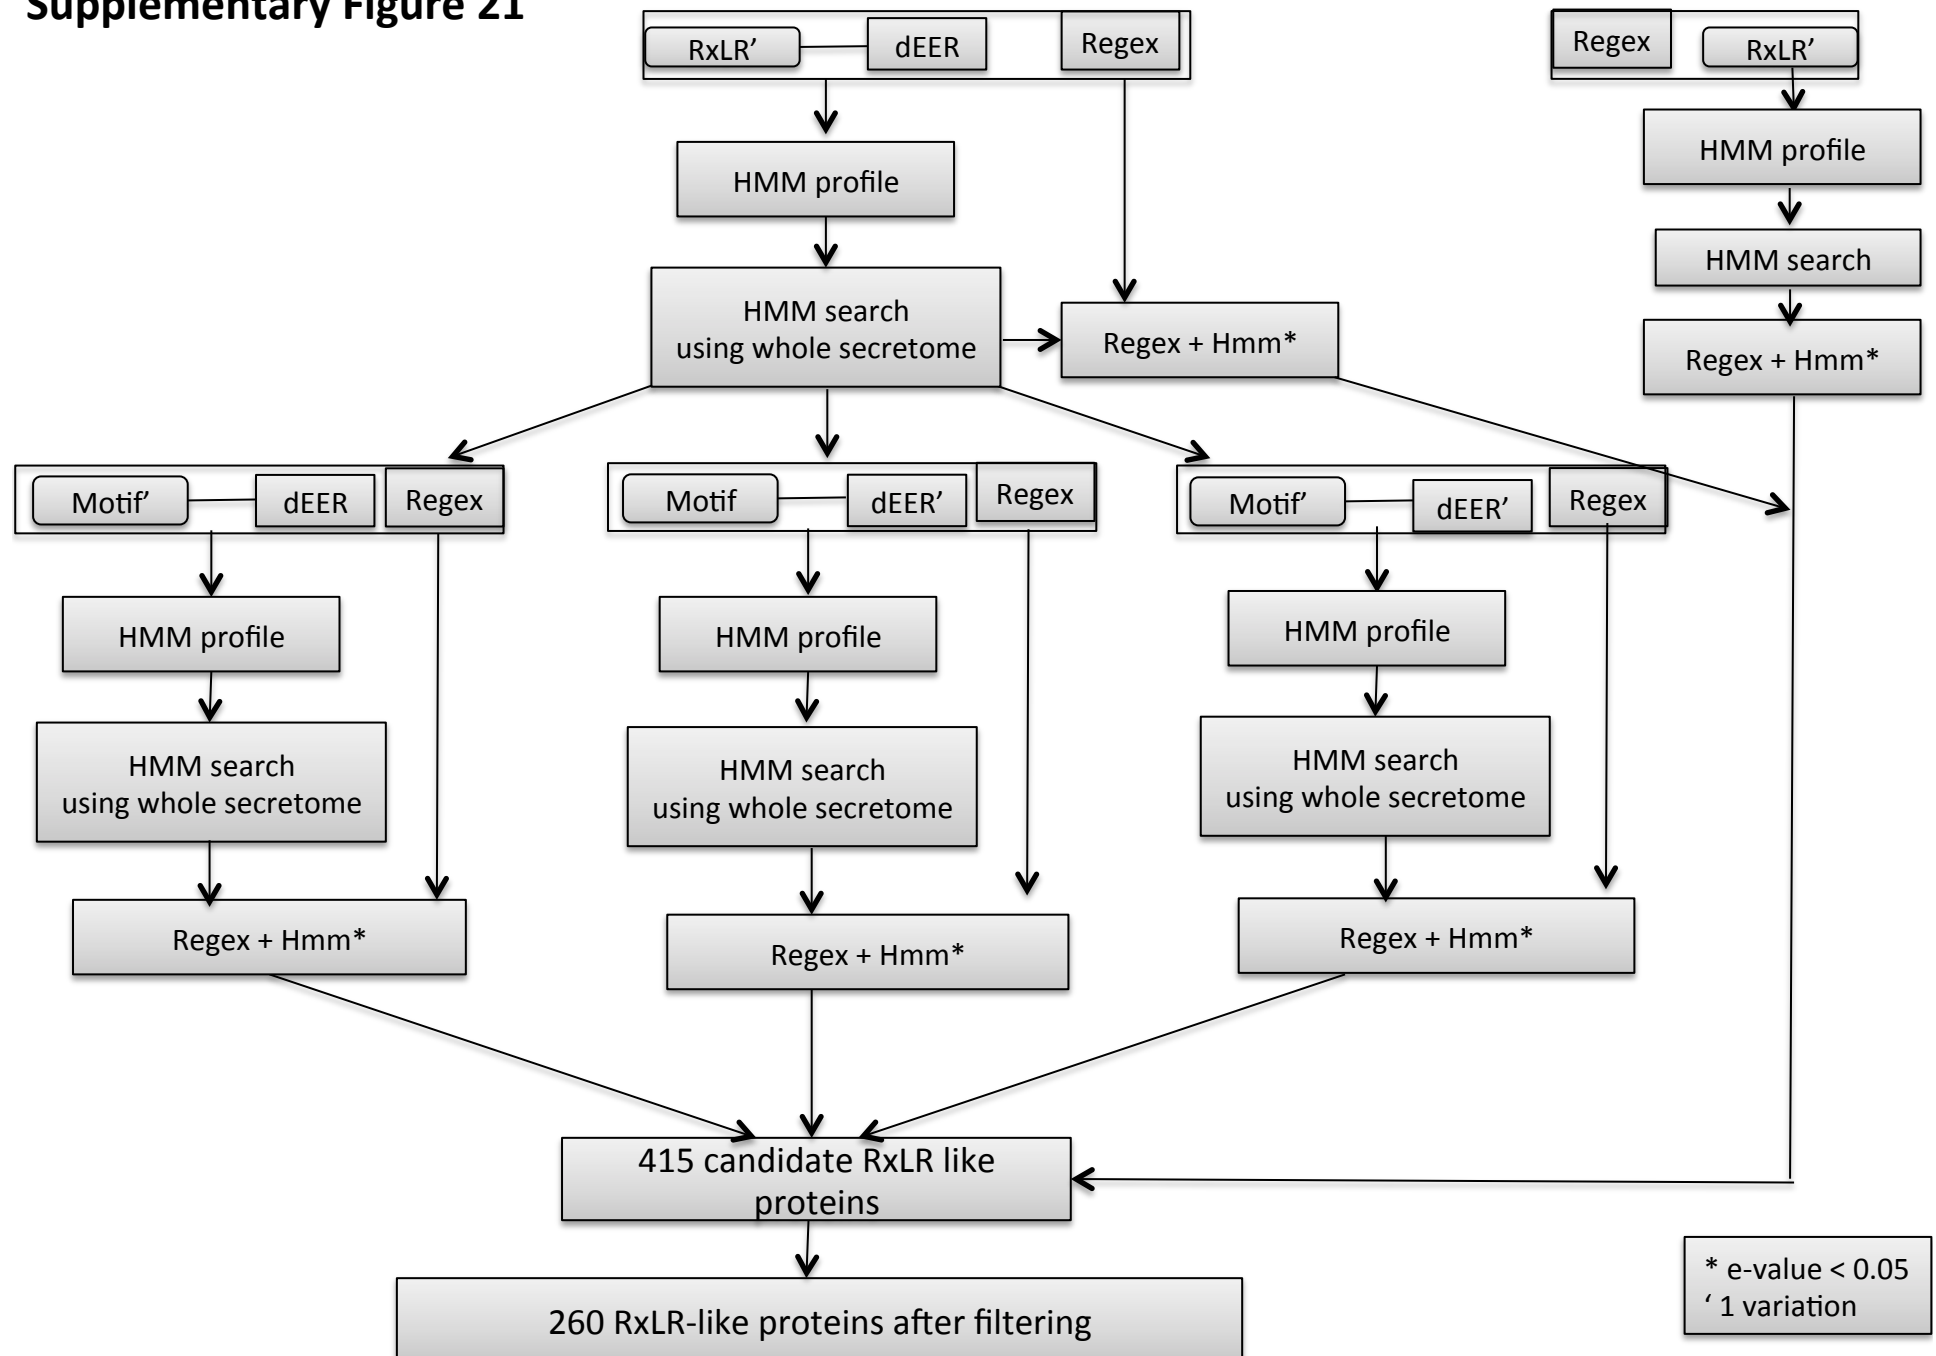

**Supplementary Figure 21.** Pipeline used for predicting RxLR-like proteins from the *P. halstedii* protein sequences.

**A**

WHISSONHMM Heuristic

WINHMM

SigP3>0.9

39 0 25 7 0 1 0 16 0 3 11 3 0 3

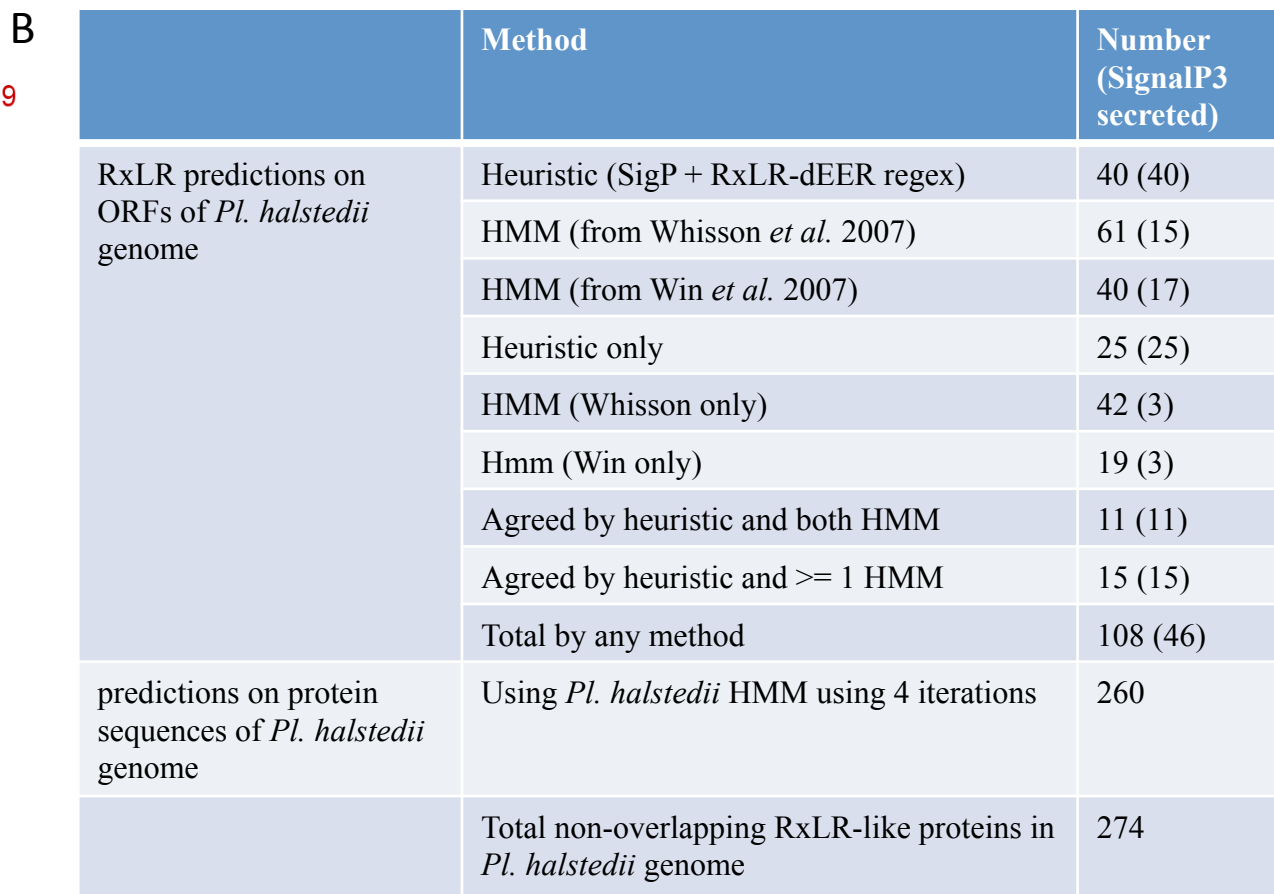

Wan J, et al. 2007. Adaptive evolution has targeted the C-terminal domain of the RXLR effectors of plant pathogenic oomycetes. *Plant Cell* 19: 2349-2369. doi: 10.1105/tpc.107.051037

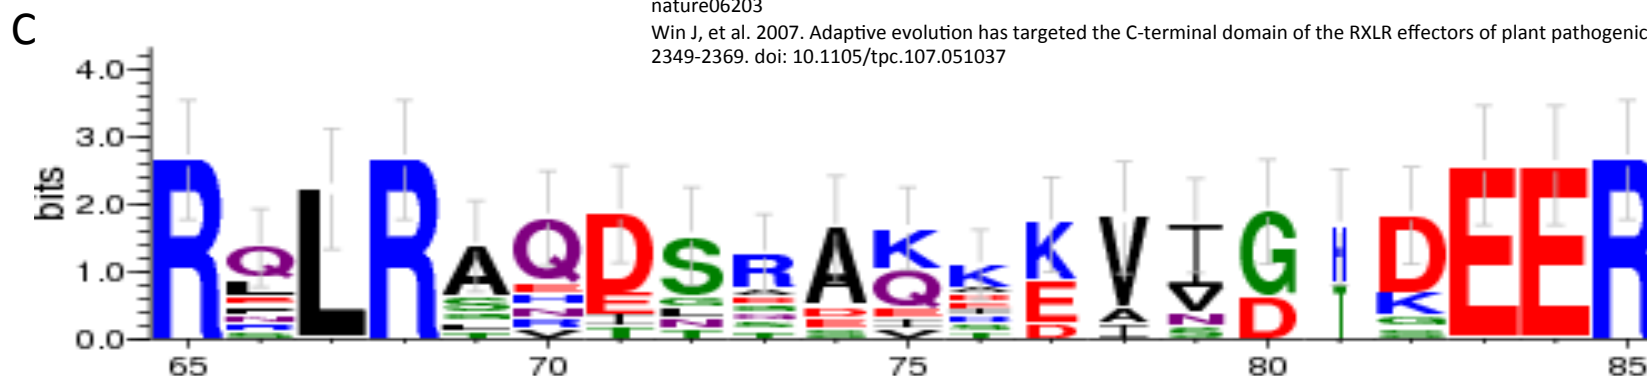

**Supplementary Figure 22: (A)** Venn-diagram representing the number of RxLR-like effectors predicted from the ORFs of *Pl. halstedii*. **(B)** RxLR-like effector predictions using different methods **(C)** Weblogo visualization of the RxLR-dEER motif of the RxLR-like effectors.





Pin\_PITG\_13534T0/1-117

Pin\_PITG\_07766T0/1-115

Prm\_Prm\_78158/1-125

Pin\_PITG\_19803T0/1-117

Prm\_Prm\_81834/1-132

Pin\_PITG\_13535T0/1-117

Prm\_Prm\_76672/1-128

Pcq\_16635/1-455

Pin\_PITG\_13536T0/1-117

167 E E E I V R N S T E D F W T P A N A F E T H V G H F W G L R G T R P Y M T A K L E V I R 210

Conservation

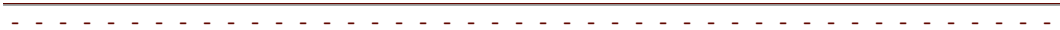

Quality

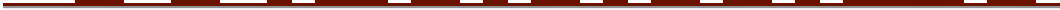

Consensus

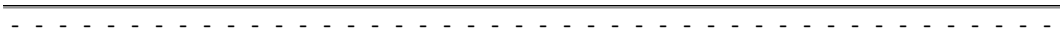

Prm\_Prm\_76663/1-112

Pso\_287018/1-119

Prm\_Prm\_78801/1-125

Pin\_PITG\_13537T0/1-155

Prm\_Prm\_76660/1-125

Pin\_PITG\_07736T0/1-120

Pin\_PITG\_13534T0/1-117

Pin\_PITG\_07766T0/1-115

Prm\_Prm\_78158/1-125

Pin\_PITG\_19803T0/1-117

Prm\_Prm\_81834/1-132

Pin\_PITG\_13535T0/1-117

Prm\_Prm\_76672/1-128

Pcq\_16635/1-455

Pin\_PITG\_13536T0/1-117

211 A L S T I P S R P A I E A A L A E A M D S M R L C R V D N L G I R E V I P T L M L I L D 254

Conservation

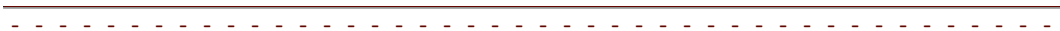

Quality

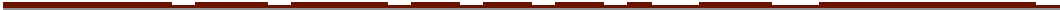

Consensus

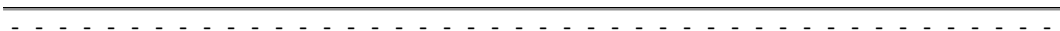

Prm\_Prm\_76663/1-112

Pso\_287018/1-119

Prm\_Prm\_78801/1-125

Pin\_PITG\_13537T0/1-155

Prm\_Prm\_76660/1-125

Pin\_PITG\_07736T0/1-120

Pin\_PITG\_13534T0/1-117

Pin\_PITG\_07766T0/1-115

Prm\_Prm\_78158/1-125

Pin\_PITG\_19803T0/1-117

Prm\_Prm\_81834/1-132

Pin\_PITG\_13535T0/1-117

Prm\_Prm\_76672/1-128

Pcq\_16635/1-455

Pin\_PITG\_13536T0/1-117

- - - - -

- - - - -

- - - - -

255 Q Y Q E A Y D F I K W Y A T T G D D D H Y D W G N M D L P F L D V R N A D M T E E I P G

- - - - -

298

Conservation

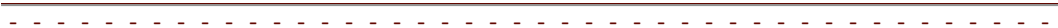

Quality

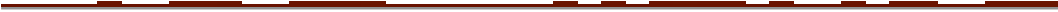

Consensus

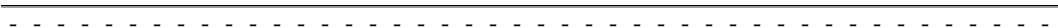

Prm\_Prm\_76663/1-112

Pso\_287018/1-119

Prm\_Prm\_78801/1-125

Pin\_PITG\_13537T0/1-155

Prm\_Prm\_76660/1-125

Pin\_PITG\_07736T0/1-120

Pin\_PITG\_13534T0/1-117

Pin\_PITG\_07766T0/1-115

Prm\_Prm\_78158/1-125

Pin\_PITG\_19803T0/1-117

Prm\_Prm\_81834/1-132

Pin\_PITG\_13535T0/1-117

Prm\_Prm\_76672/1-128

Pcq\_16635/1-455

Pin\_PITG\_13536T0/1-117

- - - - -

- - - - -

- - - - -

- - - - -

- - - - -

- - - - -

- - - - -

- - - - -

- - - - -

- - - - -

- - - - -

- - - - -

- - - - -

- - - - -

299 S M R N G R D V F F M S N L A Y I K L M L A K T V K D A I N A H N Q G R T S L P S I E S

- - - - -

342

Conservation

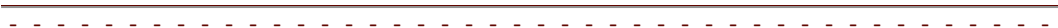

Quality

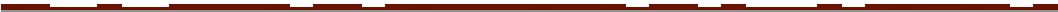

Consensus

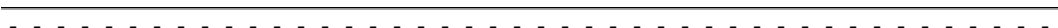

Prm\_Prm\_76663/1-112

Pso\_287018/1-119

Prm\_Prm\_78801/1-125

Pin\_PITG\_13537T0/1-155

Prm\_Prm\_76660/1-125

Pin\_PITG\_07736T0/1-120

Pin\_PITG\_13534T0/1-117

Pin\_PITG\_07766T0/1-115

Prm\_Prm\_78158/1-125

Pin\_PITG\_19803T0/1-117

Prm\_Prm\_81834/1-132

Pin\_PITG\_13535T0/1-117

Prm\_Prm\_76672/1-128

Pcq\_16635/1-455

- - - - -

- - - - -

- - - - -

- - - - -

- - - - -

- - - - -

- - - - -

- - - - -

- - - - -

- - - - -

- - - - -

- - - - -

- - - - -

343 L R A V V A P N G T M R S V T E L K R L H K K L T S Q M H A A S S L A H F Q N Q H F W N

386

---

\_\_\_\_\_

---

.....

.....

.....

.....

.....

.....

.....

.....

.....

.....

.....

.....

387 G V L D P T P I V Q A P K P P H Y A P G D I N Q V K L W V L Q S A M L W R D H H D F I R 430

.....

---

\_\_\_\_\_

---

106 - - - - - M N L R N N P - - - - - 112

107 - - - - - F R L V R R S S K N S G I - - - - - 119

113 - - - - - V K K R Y E S N P Q N F M - - - - - 125

105 - - - - - V K K R S N G N M N N F Y V D S R V C E G N K T R R K R N I R F 136

113 - - - - - V K K R Y N S N P Q N F M - - - - - 125

108 - - - - - V R K A Y E R N P N N F V - - - - - 120

105 - - - - - V K K R N N G N M N N F M - - - - - 117

103 - - - - - M K K R Y D S N P N N F I - - - - - 115

113 - - - - - P K K R Y E V N L Q N F I - - - - - 125

105 - - - - - V K K R N N G N M N N F M - - - - - 117

120 - - - - - A K K R Y E S N P Q N F M - - - - - 132

105 - - - - - V K K R N N G N M N N F M - - - - - 117

116 - - - - - M K K F R I Y N T N A N I - - - - - 128

431 E K R S A Y P D Y L P E M P Q R G I Q Q L V T F P - - - - - 455

105 - - - - - V K K R N N G N M N N F M - - - - - 117

| Year | Percentage |
|------|------------|
| 2020 | 75%        |
| 2021 | 55%        |
| 2022 | 65%        |

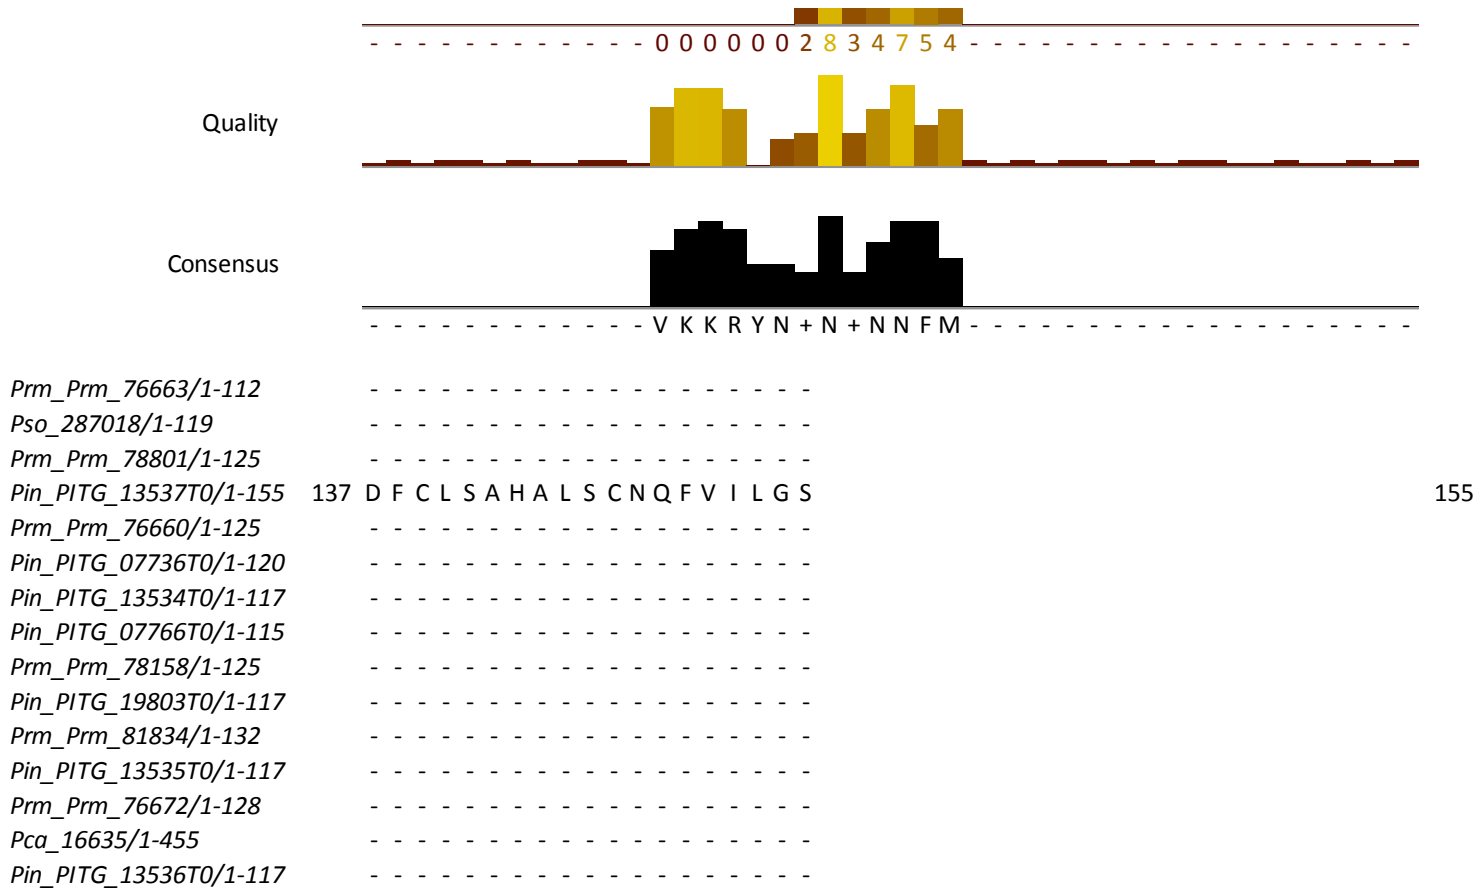

Conservation

Quality

Consensus









Consensus

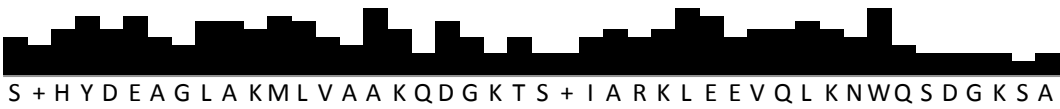

|                               |     |                                                                                         |     |
|-------------------------------|-----|-----------------------------------------------------------------------------------------|-----|
| <i>Prm_Prm_74387/1-676</i>    | 371 | D D V Y N L L K L N L E R G D I L K S P M L T T W I S Y T A K L D E N P Y Q L L L A L L | 414 |
| <i>Prm_Prm_79108/1-468</i>    |     | - - - - -                                                                               |     |
| <i>Prm_Prm_79110/1-588</i>    |     | - - - - -                                                                               |     |
| <i>Prm_Prm_79107/1-433</i>    |     | - - - - -                                                                               |     |
| <i>Pin_PITG_14884T0/1-604</i> |     | - - - - -                                                                               |     |
| <i>Prm_Prm_85872/1-585</i>    | 281 | D D V Y N L L K L N L E R G D I L K S P M L T T W I S Y T A K L D E N P Y Q L L L V K L | 324 |
| <i>Pca_102742/1-501</i>       |     | - - - - -                                                                               |     |
| <i>Pin_PITG_14880T0/1-296</i> |     | - - - - -                                                                               |     |
| <i>Prm_Prm_86912/1-294</i>    |     | - - - - -                                                                               |     |
| <i>Pso_285707/1-589</i>       |     | - - - - -                                                                               |     |
| <i>Pin_PITG_13847T0/1-512</i> |     | - - - - -                                                                               |     |
| <i>Prm_Prm_79119/1-666</i>    | 370 | D N V Y N L L K L N L D G D D I L K N P M L T T W I S Y T T K L D E N P Y E L L L A N L | 413 |
| <i>Pso_285703/1-570</i>       |     | - - - - -                                                                               |     |
| <i>Prm_Prm_74367/1-380</i>    |     | - - - - -                                                                               |     |

Conservation

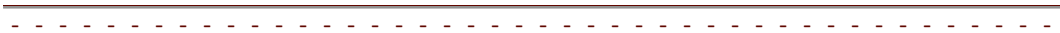

Quality

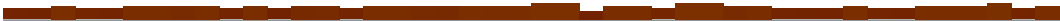

Consensus

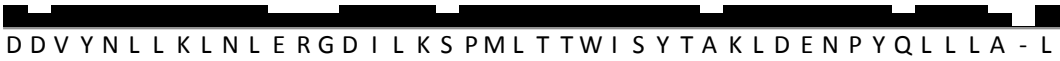

|                               |     |                                                                                         |     |
|-------------------------------|-----|-----------------------------------------------------------------------------------------|-----|
| <i>Prm_Prm_74387/1-676</i>    | 415 | M K Q Y D D A T L T K M F V A A K R G R A T E S I G T K L E E V Q L K S W L S D G K T A | 458 |
| <i>Prm_Prm_79108/1-468</i>    |     | - - - - -                                                                               |     |
| <i>Prm_Prm_79110/1-588</i>    | 365 | - - - - - S G G K T P                                                                   | 370 |
| <i>Prm_Prm_79107/1-433</i>    | 364 | - - - - - S D G K T A                                                                   | 369 |
| <i>Pin_PITG_14884T0/1-604</i> | 380 | - - - - - G R G D T A                                                                   | 385 |
| <i>Prm_Prm_85872/1-585</i>    | 325 | M K R Y D D A T L T K M F V A A K R G R A T K S I S T K L E E V Q L K S W L S D G K T A | 368 |
| <i>Pca_102742/1-501</i>       | 323 | - - - - - R Q E K T M                                                                   | 328 |
| <i>Pin_PITG_14880T0/1-296</i> |     | - - - - -                                                                               |     |
| <i>Prm_Prm_86912/1-294</i>    |     | - - - - -                                                                               |     |
| <i>Pso_285707/1-589</i>       | 355 | - - - - - V N G G E S A                                                                 | 361 |
| <i>Pin_PITG_13847T0/1-512</i> | 292 | - - - - - A A G K S G                                                                   | 297 |
| <i>Prm_Prm_79119/1-666</i>    | 414 | L K H Y D D A T L T K M F V A A K R S S A T G F T G T K L G E V Q L K N W L S S G K T A | 457 |
| <i>Pso_285703/1-570</i>       | 352 | - - - - - N D G K D A                                                                   | 357 |
| <i>Prm_Prm_74367/1-380</i>    |     | - - - - -                                                                               |     |

Conservation

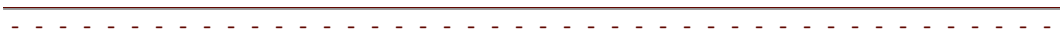

Quality

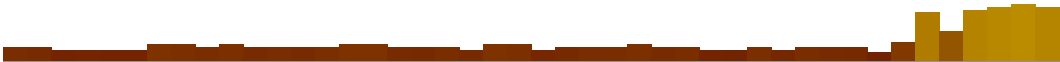

Consensus

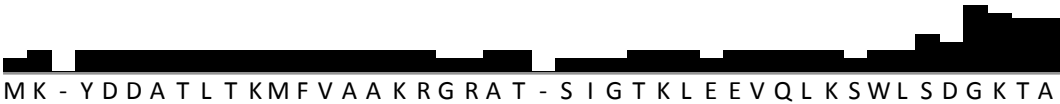

|                            |     |                                                                                         |     |
|----------------------------|-----|-----------------------------------------------------------------------------------------|-----|
| <i>Prm_Prm_74367/1-380</i> | 450 | D D V E K L L Q L N L D G D T L E A C S V W S V W S C V I T K I D K E N V D E I M E V V | 503 |
|----------------------------|-----|-----------------------------------------------------------------------------------------|-----|



|                               |     |                                                                                         |     |
|-------------------------------|-----|-----------------------------------------------------------------------------------------|-----|
| <i>Pca_102742/1-501</i>       | 414 | V R D A F V H L K L K A E G E E V F E S T A F S T W M A Y A K E L E R T N A - - - - D E | 453 |
| <i>Pin_PITG_14880T0/1-296</i> | 293 | - - - - - - - - - - - - - - - - D I W A - - - - - - - - - - - - - - - -                 | 296 |
| <i>Prm_Prm_86912/1-294</i>    |     | - - - - - - - - - - - - - - - - - - - - - - - - - - - - - - - - - - -                   |     |
| <i>Pso_285707/1-589</i>       | 442 | A D E V F K L L K L E Q A G G S V L R S P F L E T W V L Y A E K L G R V D K - K V G E F | 484 |
| <i>Pin_PITG_13847T0/1-512</i> | 384 | S D D M F K I L K L N E K G D K V F E S P G F T T W V A Y V L K L D G Y K K - T P D E F | 426 |
| <i>Prm_Prm_79119/1-666</i>    | 543 | G N D I F K L L K L D E E G Q K F F E S P A L R T W I S Y V T R L N K F N K K S P D - - | 584 |
| <i>Pso_285703/1-570</i>       | 442 | V D K A F Q L F K L D E A G K N F L E D P G L G S W V S Y V T T L S K A K K - - S D E F | 483 |
| <i>Prm_Prm_74367/1-380</i>    | 285 | - - - - - - - - - - - - - - - - - - - - - - - - - - - - - - K V N T N T P D - -         | 292 |

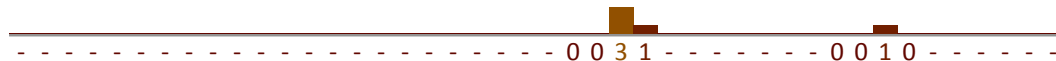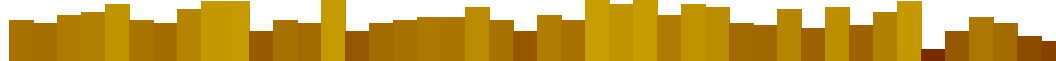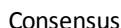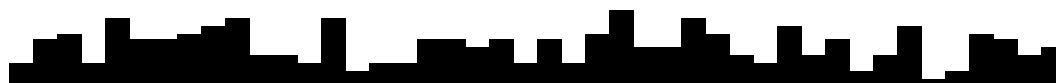

ADD I E K L L K L D E F G O K E F F S P A L S T W V S Y V T K I N K I N K O N P D F F

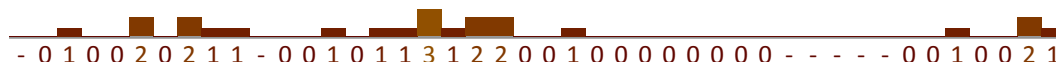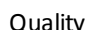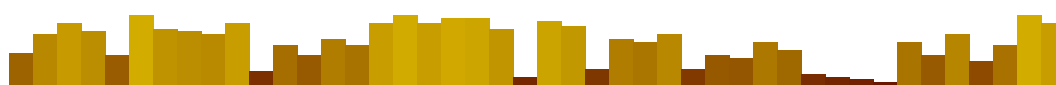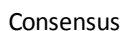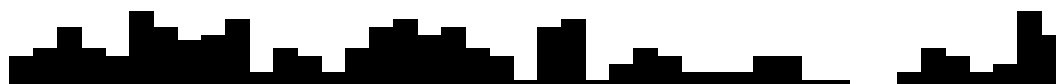

AA | S Q L E K R F G G D + E L A R M L A + A K I K A S L A A T E G A - - K V I T O L C

Pso\_285703/1-570

522

T L Q F K K W W E D G - V T P R D I S D M V T - - - - - K H F D T R G T G V V L G Y H

558

Prm\_Prm\_74367/1-380

332

D L Q F K Q W L A A G - V T P N N I G T R V M G - - - - - D V F D I R R T Q V S I D Y G

369

Conservation

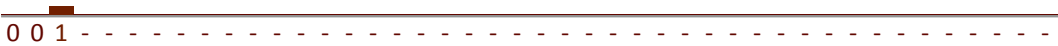

Quality

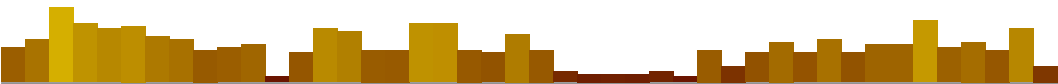

Consensus

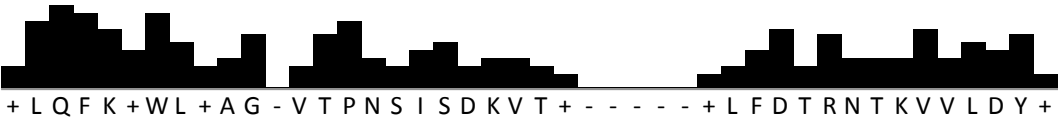

|                        |     |                                                   |     |
|------------------------|-----|---------------------------------------------------|-----|
| Prm_Prm_74387/1-676    | 666 | D F L K A - - - - - S A A R T G                   | 676 |
| Prm_Prm_79108/1-468    | 457 | E Y Y T L - - - - - N V G K V N A                 | 468 |
| Prm_Prm_79110/1-588    | 577 | D Y Y K L - - - - - N F G K V T A                 | 588 |
| Prm_Prm_79107/1-433    | -   | - - - - -                                         | -   |
| Pin_PITG_14884T0/1-604 | 593 | D F Y K A - - - - - N G G S P L Y                 | 604 |
| Prm_Prm_85872/1-585    | 574 | D F Y K T - - - - - I R L S R V I                 | 585 |
| Pcq_102742/1-501       | 496 | - - - - - K L L S E N                             | 501 |
| Pin_PITG_14880T0/1-296 | -   | - - - - -                                         | -   |
| Prm_Prm_86912/1-294    | -   | - - - - -                                         | -   |
| Pso_285707/1-589       | 565 | D F Y K A I V A R G G L K D K T R L D S I I E R V | 589 |
| Pin_PITG_13847T0/1-512 | 502 | N F L K H - - - - - N P E L S G                   | 512 |
| Prm_Prm_79119/1-666    | 661 | D F V R L - - - - - H                             | 666 |
| Pso_285703/1-570       | 559 | D F Y K A - - - - - K P V V D P L                 | 570 |
| Prm_Prm_74367/1-380    | 370 | T F Y R N - - - - - K L A A A T                   | 380 |

Conservation

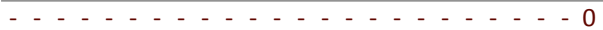

Quality

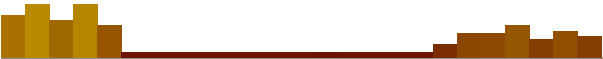

Consensus

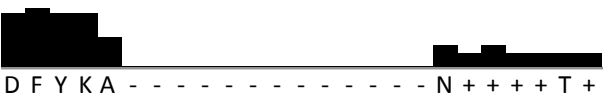





Conservation

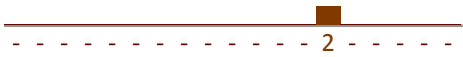

Quality

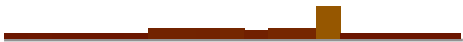

Consensus

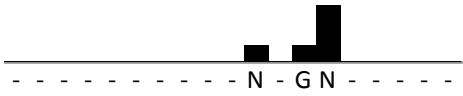

|                               |   |   |   |   |   |   |     |   |   |   |   |   |   |   |   |   |   |   |   |   |   |   |   |   |   |   |   |   |   |   |   |   |   |   |   |   |   |   |   |   |   |   |    |   |    |
|-------------------------------|---|---|---|---|---|---|-----|---|---|---|---|---|---|---|---|---|---|---|---|---|---|---|---|---|---|---|---|---|---|---|---|---|---|---|---|---|---|---|---|---|---|---|----|---|----|
| <i>Pin_PITG_15679T0/1-271</i> | 1 | - | - | - | - | - | MKV | L | Q | L | I | A | L | T | A | L | V | S | S | C | V | A | A | S | A | - | - | - | A | D | P | S | G | L | A | K | T | K | S | D | V | D | 35 |   |    |
| <i>Pin_PITG_05841T0/1-220</i> | 1 | - | - | - | - | - | MRV | L | Q | L | I | Y | V | A | A | L | V | L | R | C | A | A | V | K | T | A | T | K | S | H | T | T | S | T | V | K | I | N | S | E | A | D | 38 |   |    |
| <i>Pin_PITG_05846T0/1-263</i> | 1 | - | - | - | - | - | MRV | L | Q | L | I | C | L | V | A | L | I | S | R | C | A | A | D | T | A | T | T | N | S | H | T | A | S | T | L | K | I | N | S | D | A | D | 38 |   |    |
| <i>Prm_Prm_73724/1-343</i>    | 1 | - | - | - | - | - | MRV | L | S | L | V | A | L | I | A | F | V | S | S | C | E | A | T | S | A | V | S | N | S | D | K | V | N | V | A | K | L | D | S | G | I | A | 38 |   |    |
| <i>Pca_14162/1-348</i>        | 1 | - | - | - | - | - | MRV | L | S | L | V | T | L | L | A | F | V | S | - | - | - | A | Q | L | I | A | A | N | A | D | Q | T | G | I | A | A | V | D | S | N | T | A | 35 |   |    |
| <i>Pin_PITG_06308T0/1-254</i> | 1 | - | - | - | - | - | MQT | I | Q | L | I | I | F | V | A | F | V | L | S | R | A | A | A | S | I | S | S | F | S | D | P | T | S | I | V | N | I | N | H | D | A | N | 38 |   |    |
| <i>Pin_PITG_11952T0/1-270</i> | 1 | M | S | R | Y | S | M   | L | L | L | R | L | A | V | L | I | T | F | G | L | S | C | A | V | A | L | A | - | - | - | T | D | S | N | N | V | V | K | S | N | P | T | I  | - | 40 |
| <i>Pso_285308/1-314</i>       | 1 | - | - | - | - | - | MRF | L | F | L | L | V | A | V | A | L | A | S | A | E | A | A | E | S | A | A | M | I | H | E | E | A | G | V | S | S | F | N | T | L | T | - | 37 |   |    |
| <i>Pca_39353/1-267</i>        | 1 | - | - | - | - | - | MRV | L | S | L | V | T | L | F | T | F | V | S | - | - | - | A | Q | L | A | A | V | N | A | D | R | T | G | I | A | A | A | D | L | N | T | A | 35 |   |    |
| <i>Pso_286675/1-96</i>        | 1 | - | - | - | - | - | MRV | L | S | L | L | T | V | I | A | L | V | S | S | C | E | A | A | T | S | A | - | - | - | - | T | T | G | V | V | K | T | D | - | - | I | T | 32 |   |    |
| <i>Prm_Prm_86166/1-353</i>    | 1 | - | - | - | - | - | MRV | L | S | L | V | A | L | I | A | L | V | S | S | C | E | A | A | S | A | V | S | N | S | D | K | V | E | V | A | K | L | D | S | G | I | A | 38 |   |    |
| <i>Prm_Prm_73707/1-269</i>    | 1 | - | - | - | - | - | MRV | L | S | L | V | A | L | I | A | L | V | S | S | C | E | A | A | S | A | V | S | N | S | D | K | V | E | V | A | K | L | D | S | G | I | A | 38 |   |    |

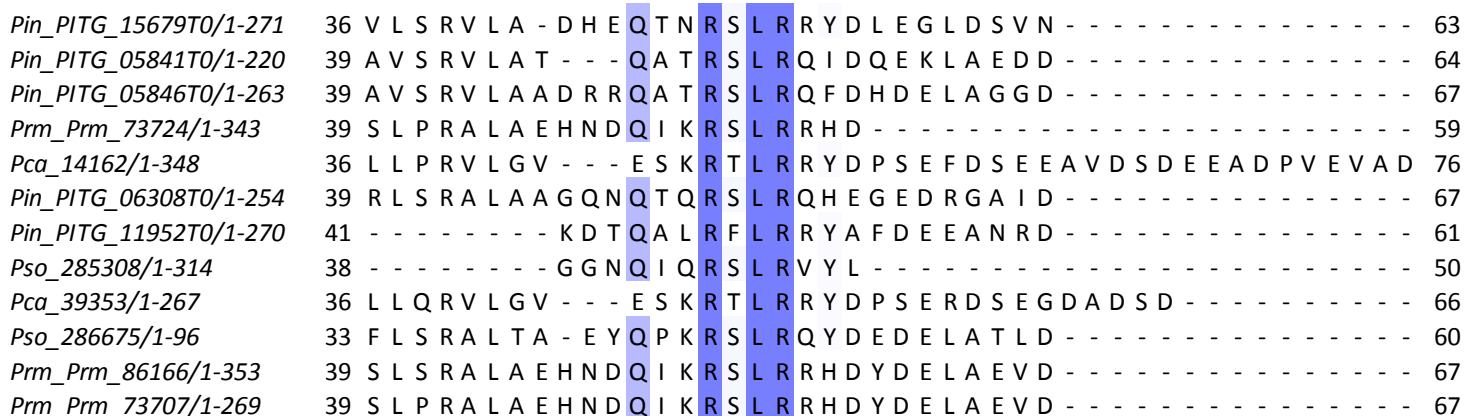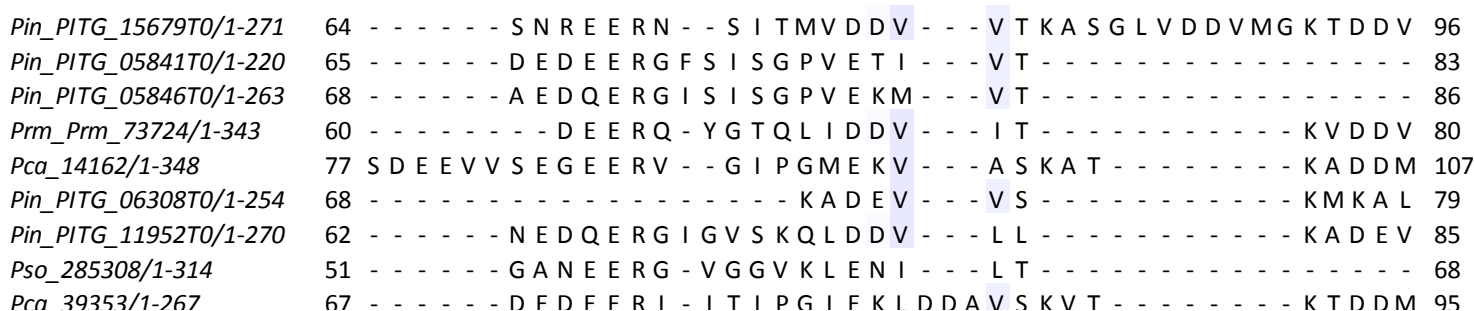

| Accession           | Length | Sequence                                              | Score |
|---------------------|--------|-------------------------------------------------------|-------|
| Pso_286675/1-96     | 61     | S E D E E R A - G T S Q K M E E L - - - V E - - - - - | 78    |
| Prm_Prm_86166/1-353 | 68     | S G D G E R M - G G A Q L I D D V - - - I T - - - - - | 90    |
| Prm_Prm_73707/1-269 | 68     | S G N G E R M - G G A Q L I D D V - - - I T - - - - - | 90    |

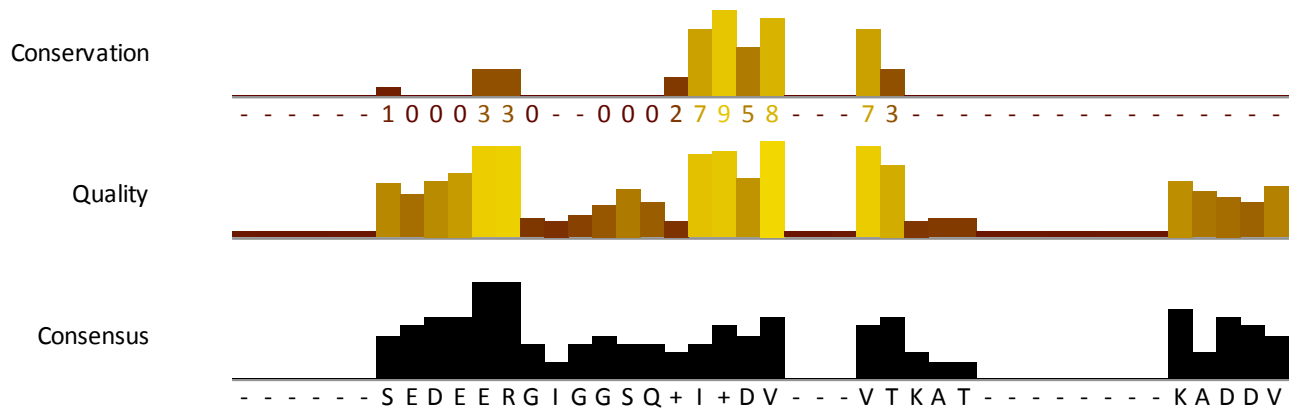[illegible]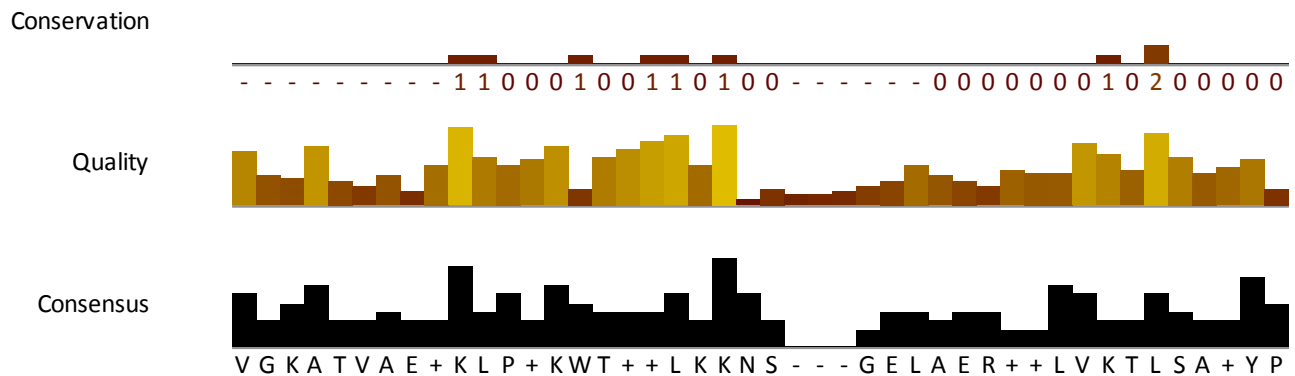[illegible]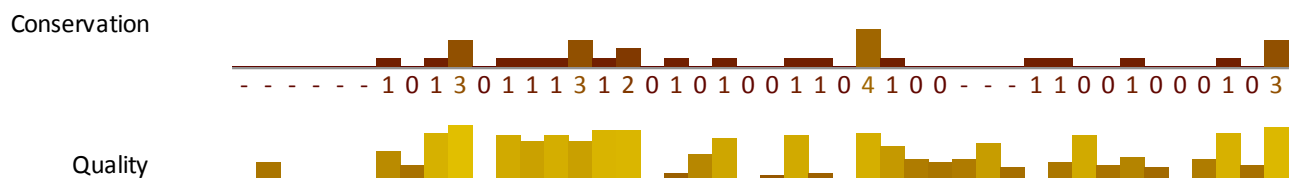



|                               |     |                                                                                         |     |
|-------------------------------|-----|-----------------------------------------------------------------------------------------|-----|
| <i>Prm_Prm_73724/1-343</i>    | 243 | E G G V G G T - - - - - I M H S L G E T A F K - - - N A L E P S K G Y V                 | 270 |
| <i>Pca_14162/1-348</i>        | 275 | E G G V N G Q - - - - - L L H K L G E Y P F K - - - - - K G A T                         | 296 |
| <i>Pin_PITG_06308T0/1-254</i> | 247 | E G G V C R A L - - - - - - - - - - - - - - - - - - - - - - - - -                       | 254 |
| <i>Pin_PITG_11952T0/1-270</i> | 251 | E G Y V D - - - - - - - - - - - - - - - - - - - - - - - - -                             | 255 |
| <i>Pso_285308/1-314</i>       | 225 | E G G V R Y R S D I F I F Y R W S V L T L V M A L Q V K V K K L K E L G V T L V G D K T | 268 |
| <i>Pca_39353/1-267</i>        | 263 | E G G V K - - - - - - - - - - - - - - - - - - - - - - - - -                             | 267 |
| <i>Pso_286675/1-96</i>        |     | - - - - - - - - - - - - - - - - - - - - - - - - -                                       |     |
| <i>Prm_Prm_86166/1-353</i>    | 253 | E G G V G G T - - - - - I M H S L G E T A F K - - - N A L E P S K G Y V                 | 280 |
| <i>Prm_Prm_73707/1-269</i>    | 169 | E G G V G G T - - - - - I M H S L G E T A F K - - - N A L E P S K G Y V                 | 196 |

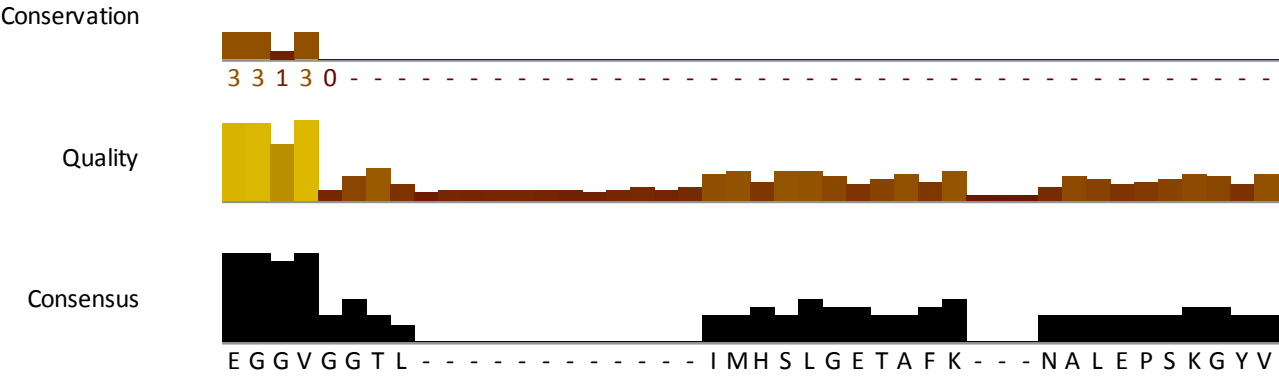

|                               |     |                                                                                         |     |
|-------------------------------|-----|-----------------------------------------------------------------------------------------|-----|
| <i>Pin_PITG_15679T0/1-271</i> | -   | - - - - - - - - - - - - - - - - - - - - - - - - -                                       |     |
| <i>Pin_PITG_05841T0/1-220</i> | -   | - - - - - - - - - - - - - - - - - - - - - - - - -                                       |     |
| <i>Pin_PITG_05846T0/1-263</i> | -   | - - - - - - - - - - - - - - - - - - - - - - - - -                                       |     |
| <i>Prm_Prm_73724/1-343</i>    | 271 | Y N S F W M K A D D I F D Q W P E S I R Y R I W V S F D D A E K M L K K R P Q M A E I V | 314 |
| <i>Pca_14162/1-348</i>        | 297 | A Y A Y M M K A S T V Y D D W A E S I R Y R I W L S Y D D A I T L L G K R D Y M A K V V | 340 |
| <i>Pin_PITG_06308T0/1-254</i> | -   | - - - - - - - - - - - - - - - - - - - - - - - - -                                       |     |
| <i>Pin_PITG_11952T0/1-270</i> | 256 | - R S W I L G A V T I Y T N S R - - - - - - - - - - - - - - - - - - -                   | 270 |
| <i>Pso_285308/1-314</i>       | 269 | Y E S F L M R S K K V Y E Q W S E S R R L R V W V R E C Q S I E I P G E T Q L T V R L L | 312 |
| <i>Pca_39353/1-267</i>        | -   | - - - - - - - - - - - - - - - - - - - - - - - - -                                       |     |
| <i>Pso_286675/1-96</i>        | -   | - - - - - - - - - - - - - - - - - - - - - - - - -                                       |     |
| <i>Prm_Prm_86166/1-353</i>    | 281 | Y N S F W M K A D D I F D Q W P E S I R Y R I W V S F D D A E K M L K K R P Q M A E I V | 324 |
| <i>Prm_Prm_73707/1-269</i>    | 197 | Y N S F W M K A D D I F D Q W P E S I R Y R I W V S F D D A E K M L K K R P Q M A E I V | 240 |

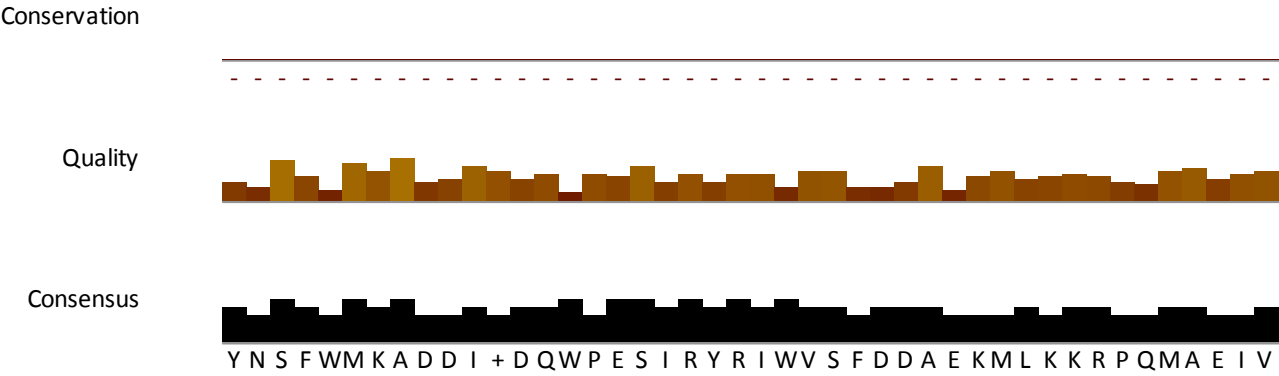

|                               |     |                                                           |     |
|-------------------------------|-----|-----------------------------------------------------------|-----|
| <i>Pin_PITG_15679T0/1-271</i> | -   | - - - - - - - - - - - - - - - - - - - - - - - - -         |     |
| <i>Pin_PITG_05841T0/1-220</i> | -   | - - - - - - - - - - - - - - - - - - - - - - - - -         |     |
| <i>Pin_PITG_05846T0/1-263</i> | -   | - - - - - - - - - - - - - - - - - - - - - - - - -         |     |
| <i>Prm_Prm_73724/1-343</i>    | 315 | K A T K E K A A L V K T G D L P A M D D T L S K L K F E P | 343 |
| <i>Pca_14162/1-348</i>        | 341 | S T G S N A W W - - - - - - - - - - - - - - - - - - -     | 348 |
| <i>Pin_PITG_06308T0/1-254</i> | -   | - - - - - - - - - - - - - - - - - - - - - - - - -         |     |
| <i>Pin_PITG_11952T0/1-270</i> | -   | - - - - - - - - - - - - - - - - - - - - - - - - -         |     |
| <i>Pso_285308/1-314</i>       | 313 | F N - - - - - - - - - - - - - - - - - - - - - - - - -     | 314 |
| <i>Pca_39353/1-267</i>        | -   | - - - - - - - - - - - - - - - - - - - - - - - - -         |     |
| <i>Pso_286675/1-96</i>        | -   | - - - - - - - - - - - - - - - - - - - - - - - - -         |     |
| <i>Prm_Prm_86166/1-353</i>    | 325 | K A T K E K A A L V K T G D L P A M D D T L S K L K F E P | 353 |
| <i>Prm_Prm_73707/1-269</i>    | 241 | K A T K E K A A L V K T G D L P A M D D T L S K L K F E P | 269 |

Conservation

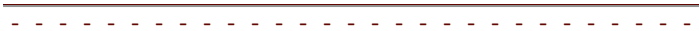

Quality

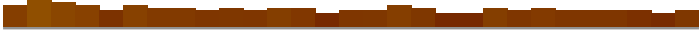

Consensus

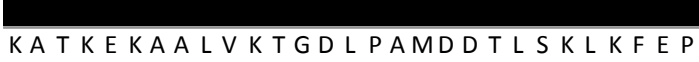

K A T K E K A A L V K T G D L P A M D D T L S K L K F E P

Ortholog 5

|                               |   |   |   |   |   |   |   |   |   |   |   |   |   |   |   |   |   |   |   |   |   |   |   |   |   |   |   |   |   |   |   |   |   |   |   |   |   |   |   |   |   |   |   |   |    |    |
|-------------------------------|---|---|---|---|---|---|---|---|---|---|---|---|---|---|---|---|---|---|---|---|---|---|---|---|---|---|---|---|---|---|---|---|---|---|---|---|---|---|---|---|---|---|---|---|----|----|
| <i>Prm_Prm_81825/1-294</i>    | 1 | M | R | L | P | S | I | L | V | V | V | S | A | L | T | L | L | A | R | G | T | A | L | - | - | S | A | D | T | D | K | G | V | M | V | - | - | - | - | S | T | M | A | S | P  | 38 |
| <i>Prm_Prm_81823/1-659</i>    | 1 | M | R | L | P | S | I | L | L | V | V | S | A | L | T | L | F | A | S | G | T | A | L | - | - | S | A | D | T | D | K | G | V | M | V | - | - | - | - | S | T | M | A | S | P  | 38 |
| <i>Prm_Prm_81822/1-293</i>    | 1 | M | R | L | P | S | I | L | L | V | V | S | A | L | T | L | F | A | S | G | T | A | L | - | - | S | A | D | T | D | K | G | V | M | V | - | - | - | - | S | T | M | A | S | P  | 38 |
| <i>Prm_Prm_78748/1-293</i>    | 1 | M | R | L | P | S | L | L | A | V | V | S | A | L | T | L | L | A | R | G | T | A | L | - | - | S | A | G | A | D | K | G | M | I | V | - | - | - | - | S | T | M | A | S | P  | 38 |
| <i>Pin_PITG_07569T0/1-287</i> | 1 | M | R | L | S | T | I | I | L | A | V | S | A | V | T | L | V | A | G | V | N | A | L | C | E | A | A | N | V | D | Q | A | M | V | M | - | - | - | - | P | L | T | Y | A | 39 |    |
| <i>Pcq_10713/1-289</i>        | 1 | M | R | L | S | V | I | L | L | A | V | F | A | L | S | S | S | S | V | S | A | T | R | - | - | N | H | P | G | E | T | A | T | A | N | - | - | - | - | T | A | M | Q | G | V  | 38 |
| <i>Pin_PITG_07566T0/1-217</i> | 1 | M | R | L | S | N | I | I | L | V | V | N | A | L | T | L | V | A | G | D | N | A | L | C | E | A | A | A | A | D | Q | A | M | V | M | - | - | - | - | P | L | T | Y | T | 39 |    |
| <i>Pso_336774/1-303</i>       | 1 | M | R | L | P | S | I | L | L | A | A | S | A | L | A | L | L | A | S | D | S | A | L | A | A | V | A | G | A | S | E | G | T | K | V | - | - | - | - | S | T | M | A | F | P  | 40 |
| <i>Pso_286958/1-293</i>       | 1 | M | R | L | P | S | I | L | L | A | V | S | A | L | T | V | L | A | S | D | S | A | L | A | A | V | A | G | A | S | E | D | A | K | V | S | T | M | A | S | T | M | A | S | P  | 44 |

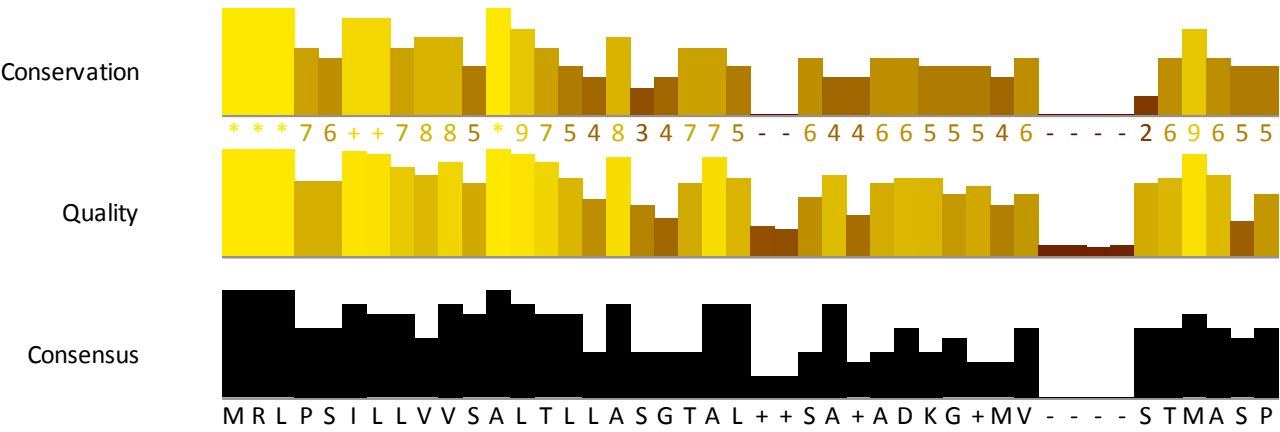

|                               |    |   |   |   |   |   |   |   |   |   |   |   |   |   |   |   |   |   |   |   |   |   |   |   |   |   |   |   |   |   |   |   |   |   |   |   |   |   |   |   |   |   |   |    |    |    |
|-------------------------------|----|---|---|---|---|---|---|---|---|---|---|---|---|---|---|---|---|---|---|---|---|---|---|---|---|---|---|---|---|---|---|---|---|---|---|---|---|---|---|---|---|---|---|----|----|----|
| <i>Prm_Prm_81825/1-294</i>    | 39 | D | S | G | L | L | D | V | G | H | N | S | G | K | R | F | L | R | V | H | E | T | N | E | D | D | G | S | E | E | R | L | S | G | A | N | M | F | N | T | E | K | I | K  | 82 |    |
| <i>Prm_Prm_81823/1-659</i>    | 39 | D | S | G | L | L | D | V | G | H | N | S | G | K | R | F | L | R | V | H | E | T | A | N | E | D | D | G | S | E | E | R | L | S | G | A | N | M | F | S | T | K | K | I  | K  | 82 |
| <i>Prm_Prm_81822/1-293</i>    | 39 | D | S | G | L | L | D | V | G | H | N | S | G | K | R | F | L | R | V | H | E | T | A | N | E | D | D | G | S | E | E | R | L | S | G | A | N | M | F | S | T | K | K | I  | K  | 82 |
| <i>Prm_Prm_78748/1-293</i>    | 39 | D | S | G | L | L | D | V | G | R | N | N | G | K | R | F | L | R | V | H | E | T | A | D | G | D | D | H | S | E | E | R | L | S | G | A | N | M | F | N | T | E | K | I  | K  | 82 |
| <i>Pin_PITG_07569T0/1-287</i> | 40 | N | S | V | S | E | D | L | N | N | A | D | G | K | R | Y | L | R | - | - | - | - | S | S | E | N | - | - | E | E | R | L | G | A | N | M | F | N | I | K | K | L | E | 76 |    |    |
| <i>Pcq_10713/1-289</i>        | 39 | D | G | M | R | T | D | T | - | - | - | N | Q | M | R | F | L | R | - | - | - | T | E | A | D | D | D | - | - | E | E | R | L | A | G | K | N | M | F | N | A | E | K | I  | E  | 74 |
| <i>Pin_PITG_07566T0/1-217</i> | 40 | K | Y | V | S | E | D | L | S | N | A | D | G | K | R | Y | L | R | - | - | - | - | S | S | D | D | - | - | E | E | R | L | G | A | N | T | F | H | I | K | K | L | E | 76 |    |    |
| <i>Pso_336774/1-303</i>       | 41 | D | L | D | V | L | A | V | S | H | - | S | A | K | R | S | L | H | D | I | E | R | V | D | E | D | D | - | - | E | E | R | W | A | G | A | K | L | F | S | A | A | K | L  | E  | 81 |
| <i>Pso_286958/1-293</i>       | 45 | D | L | D | V | L | A | V | S | H | - | S | A | T | R | F | L | R | G | L | E | S | V | G | E | V | D | - | - | E | D | R | L | A | G | D | K | L | F | H | A | A | K | L  | K  | 85 |

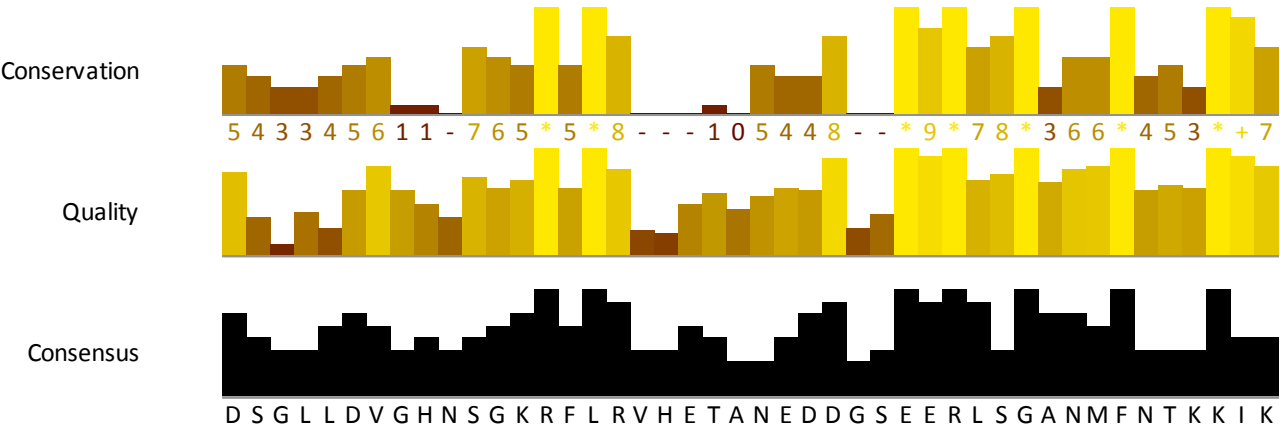

|                               |    |   |   |   |   |   |   |   |   |   |   |   |   |   |   |   |   |   |   |   |   |   |   |   |   |   |   |   |   |   |   |   |   |   |   |   |   |   |   |   |   |   |   |   |     |     |
|-------------------------------|----|---|---|---|---|---|---|---|---|---|---|---|---|---|---|---|---|---|---|---|---|---|---|---|---|---|---|---|---|---|---|---|---|---|---|---|---|---|---|---|---|---|---|---|-----|-----|
| <i>Prm_Prm_81825/1-294</i>    | 83 | Q | A | M | A | D | S | N | Y | A | K | T | L | F | R | R | W | K | R | N | G | F | E | G | N | D | A | F | D | K | L | K | A | Y | N | I | G | K | D | N | N | V | Y | K | L   | 126 |
| <i>Prm_Prm_81823/1-659</i>    | 83 | Q | A | M | A | D | S | N | Y | A | K | T | L | F | R | R | W | K | R | Y | G | F | G | G | D | D | A | F | N | K | L | K | A | Y | N | I | D | N | D | N | S | V | Y | K | L   | 126 |
| <i>Prm_Prm_81822/1-293</i>    | 83 | Q | A | M | A | D | P | N | Y | A | K | T | L | F | R | R | W | K | R | N | G | V | E | A | D | G | A | F | N | K | L | K | A | Y | N | I | D | N | D | - | N | V | F | R | L   | 126 |
| <i>Prm_Prm_78748/1-293</i>    | 83 | L | A | I | A | D | S | K | Y | A | K | T | L | F | R | R | W | K | R | Y | G | F | E | S | D | D | A | F | K | K | L | T | V | H | N | L | H | K | D | D | N | V | F | Q | L   | 126 |
| <i>Pin_PITG_07569T0/1-287</i> | 77 | D | A | L | N | D | T | T | Y | A | K | T | L | F | R | R | W | K | R | S | G | V | N | E | D | T | I | T | T | K | F | K | N | L | Q | I | S | L | D | E | N | A | L | E | L   | 120 |
| <i>Pca_10713/1-289</i>        | 75 | K | A | L | Q | D | T | S | Y | A | K | T | L | F | R | R | W | K | R | Y | E | V | E | H | G | A | A | F | D | K | L | I | K | F | N | I | G | K | D | D | K | V | F | G | L   | 118 |
| <i>Pin_PITG_07566T0/1-217</i> | 77 | D | A | L | N | D | T | T | Y | A | K | T | L | F | R | R | W | K | R | S | G | V | D | E | D | T | V | T | T | K | F | K | S | M | Q | I | S | M | D | E | N | A | L | E | L   | 120 |
| <i>Pso_336774/1-303</i>       | 82 | K | A | M | N | D | S | K | Y | A | E | T | L | M | M | R | W | K | R | H | G | F | D | I | E | D | T | K | L | S | L | E | A | S | K | L | S | K | D | P | R | L | - | - | -   | 122 |
| <i>Pso_286958/1-293</i>       | 86 | R | A | M | D | S | K | Y | A | E | T | L | M | K | R | W | K | R | H | G | Y | D | I | E | K | A | K | S | I | L | D | V | S | R | Y | A | K | N | E | K | L | N | A | I | 129 |     |

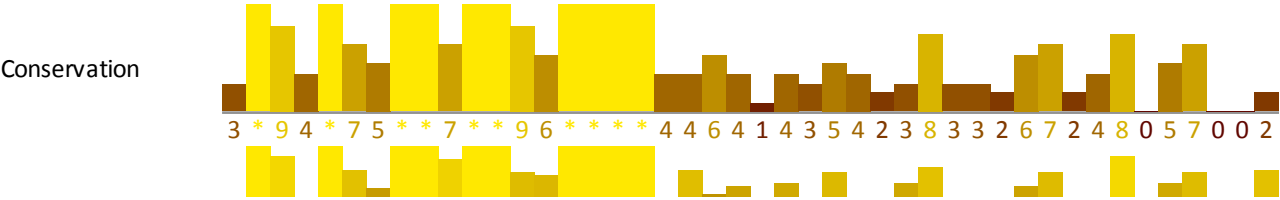

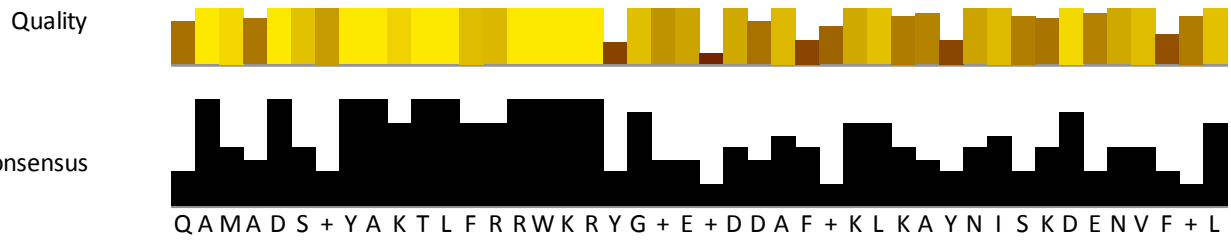

|                               |     |   |   |   |   |   |   |   |   |   |   |   |   |   |   |   |   |   |   |   |   |   |   |   |   |   |   |   |   |   |   |   |   |   |   |   |   |   |   |   |   |   |   |     |   |     |
|-------------------------------|-----|---|---|---|---|---|---|---|---|---|---|---|---|---|---|---|---|---|---|---|---|---|---|---|---|---|---|---|---|---|---|---|---|---|---|---|---|---|---|---|---|---|---|-----|---|-----|
| <i>Prm_Prm_81825/1-294</i>    | 127 | Y | T | N | Y | V | T | W | L | D | T | H | H | P | L | - | - | G | - | V | V | T | G | D | K | K | M | F | D | E | T | K | L | K | K | A | M | E | D | G | T | Y | A | N   | T | 167 |
| <i>Prm_Prm_81823/1-659</i>    | 127 | Y | T | N | Y | F | T | W | L | E | T | H | H | P | V | - | - | G | - | V | V | T | G | D | K | K | M | F | D | E | T | K | L | K | K | A | M | G | D | G | T | Y | A | N   | T | 167 |
| <i>Prm_Prm_81822/1-293</i>    | 126 | Y | K | N | Y | F | T | W | L | K | T | R | H | P | V | - | - | G | - | V | V | T | G | D | K | K | M | F | D | E | T | K | L | K | K | A | M | G | D | G | T | Y | A | N   | T | 166 |
| <i>Prm_Prm_78748/1-293</i>    | 127 | Y | K | N | Y | L | A | W | L | E | T | H | H | P | L | - | - | G | - | I | V | T | G | D | K | K | M | F | D | R | V | K | L | Q | K | A | M | G | D | G | T | Y | A | T   | T | 167 |
| <i>Pin_PITG_07569T0/1-287</i> | 121 | I | Q | S | Y | R | I | W | L | N | A | H | - | - | - | - | - | A | T | K | T | N | P | K | L | F | D | R | A | K | I | K | K | A | L | E | D | G | T | Y | A | N | V | 157 |   |     |
| <i>Pca_10713/1-289</i>        | 119 | Y | K | S | Y | V | S | W | L | E | K | H | H | P | L | - | - | G | A | E | T | G | G | G | P | N | L | F | S | K | A | K | L | D | K | A | M | K | D | P | K | Y | E | N   | T | 160 |
| <i>Pin_PITG_07566T0/1-217</i> | 121 | I | Q | S | Y | R | I | W | L | N | A | H | - | - | - | - | - | A | T | K | T | N | P | K | L | F | D | I | A | K | I | K | K | A | L | E | D | G | T | Y | A | H | V | 157 |   |     |
| <i>Pso_336774/1-303</i>       | 123 | - | - | - | - | - | - | - | - | - | - | - | - | - | - | - | - | - | - | - | - | - | - | - | - | - | - | - | N | T | A | K | I | Q | N | A | L | G | D | S | N | Y | A | K   | T | 139 |
| <i>Pso_286958/1-293</i>       | 130 | Y | L | K | Y | A | A | W | L | D | T | H | F | S | R | L | P | G | V | K | P | S | G | G | D | D | L | F | N | K | A | K | L | E | V | A | I | K | D | G | N | Y | K | R   | T | 173 |

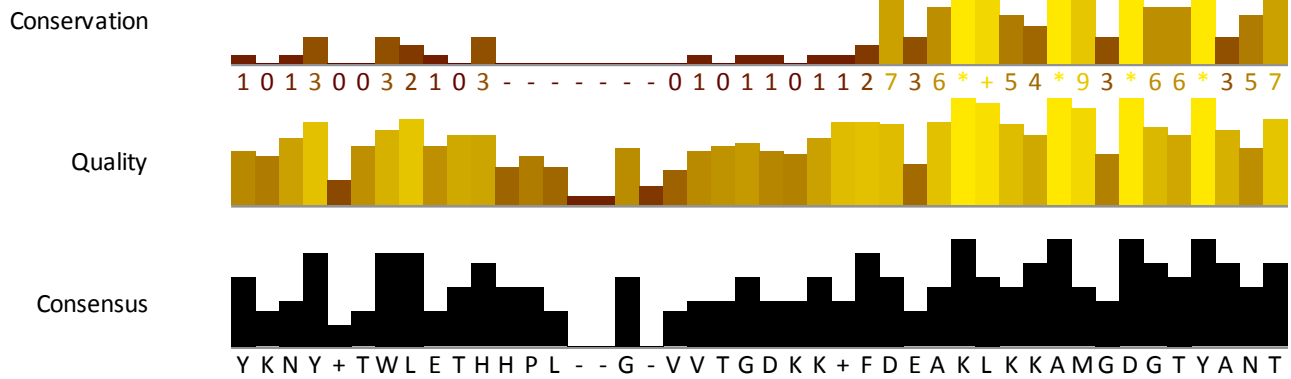

|                               |     |   |   |   |   |   |   |   |   |   |   |   |   |   |   |   |   |   |   |   |   |   |   |   |   |   |   |   |   |   |   |   |   |   |   |   |   |   |   |   |   |   |   |   |   |     |     |
|-------------------------------|-----|---|---|---|---|---|---|---|---|---|---|---|---|---|---|---|---|---|---|---|---|---|---|---|---|---|---|---|---|---|---|---|---|---|---|---|---|---|---|---|---|---|---|---|---|-----|-----|
| <i>Prm_Prm_81825/1-294</i>    | 168 | L | F | G | R | W | K | H | N | R | L | D | S | D | A | V | F | A | R | F | Q | Q | M | G | V | K | K | - | D | N | N | L | Y | K | L | Y | T | D | Y | Y | A | W | L | Q | I | 210 |     |
| <i>Prm_Prm_81823/1-659</i>    | 168 | L | F | G | R | W | K | R | N | G | L | D | S | D | E | V | F | A | R | F | Q | K | M | G | V | M | E | - | D | N | N | L | F | K | L | Y | T | D | Y | F | A | W | L | Q | I | 210 |     |
| <i>Prm_Prm_81822/1-293</i>    | 167 | L | F | G | R | W | K | R | N | G | L | D | S | D | E | V | F | T | R | F | Q | K | M | G | V | K | K | - | D | N | N | L | Y | K | L | Y | T | D | Y | F | A | W | L | Q | I | 209 |     |
| <i>Prm_Prm_78748/1-293</i>    | 168 | L | F | Q | R | W | K | R | N | G | I | D | S | D | G | V | F | D | R | F | K | Q | L | G | V | K | K | - | D | N | I | L | Y | K | L | Y | T | D | Y | F | A | W | L | Q | I | 210 |     |
| <i>Pin_PITG_07569T0/1-287</i> | 158 | L | Y | G | R | W | K | R | Y | G | F | E | S | D | D | V | F | K | R | F | Q | R | M | G | V | N | K | - | D | D | N | L | Y | Q | V | Y | K | N | Y | V | T | W | L | N | V | 200 |     |
| <i>Pca_10713/1-289</i>        | 161 | M | F | G | R | W | K | R | Q | G | F | E | S | D | A | A | Y | N | K | L | L | A | F | N | L | A | S | - | D | A | D | V | Y | K | I | Y | T | K | Y | V | T | W | L | N | I | 203 |     |
| <i>Pin_PITG_07566T0/1-217</i> | 158 | L | Y | G | R | W | K | R | Y | G | F | E | S | D | D | V | F | K | R | F | Q | R | M | G | V | N | K | - | D | D | N | L | Y | Q | V | Y | K | N | Y | V | T | W | L | N | V | 200 |     |
| <i>Pso_336774/1-303</i>       | 140 | L | F | R | E | W | K | T | H | D | H | E | S | T | D | I | L | K | K | L | K | V | L | G | L | R | K | G | - | D | G | D | G | D | K | L | F | K | N | Y | A | S | W | L | N | I   | 183 |
| <i>Pso_286958/1-293</i>       | 174 | L | F | K | E | W | K | T | H | N | Y | E | S | E | A | V | F | K | Q | L | N | A | L | G | R | K | D | F | - | D | N | T | L | D | R | L | Y | V | D | Y | V | I | W | L | N | V   | 217 |

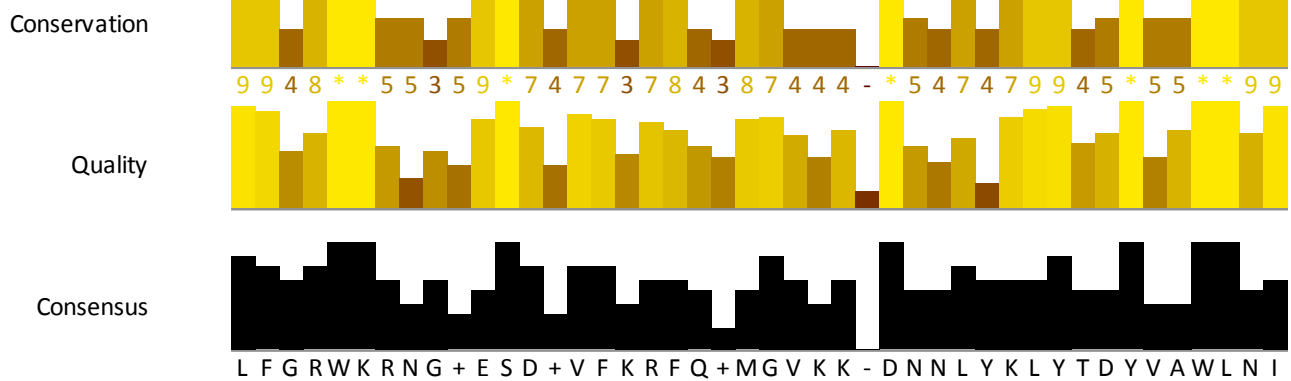

|                               |     |   |   |   |   |   |   |   |   |   |   |   |   |   |   |   |   |   |   |   |   |   |   |   |   |   |   |   |   |   |   |   |   |   |   |   |   |   |   |   |   |   |   |   |   |     |
|-------------------------------|-----|---|---|---|---|---|---|---|---|---|---|---|---|---|---|---|---|---|---|---|---|---|---|---|---|---|---|---|---|---|---|---|---|---|---|---|---|---|---|---|---|---|---|---|---|-----|
| <i>Prm_Prm_81825/1-294</i>    | 211 | H | H | P | I | P | G | S | Q | K | V | S | A | K | Y | F | L | F | D | S | T | R | L | N | R | A | M | K | D | T | T | F | A | E | K | L | F | A | K | W | K | T | S | G | L | 254 |
| <i>Prm_Prm_81823/1-659</i>    | 211 | H | H | P | I | P | G | S | Q | K | V | S | A | K | D | F | L | F | D | S | T | R | L | N | R | A | M | K | D | T | T | F | A | E | K | L | F | A | K | W | K | T | S | G | L | 254 |
| <i>Prm_Prm_81822/1-293</i>    | 210 | H | H | P | I | P | G | S | Q | K | V | S | A | K | D | F | L | F | D | S | T | R | L | N | R | A | M | K | D | T | T | F | A | E | K | L | F | A | K | W | K | T | S | G | L | 253 |
| <i>Prm_Prm_78748/1-293</i>    | 211 | H | H | P | T | A | S | S | K | K | V | L | A | K | D | F | L | F | D | S | T | R | L | N | R | A | M | E | D | K | D | F | A | G | K | L | F | A | K | W | K | T | N | G | M | 254 |
| <i>Pin_PITG_07569T0/1-287</i> | 201 | H | H | P | L | K | K | S | T | L | T | T | P | E | A | F | L | F | Y | P | S | R | I | Q | R | A | K | S | D | P | A | F | A | E | T | L | F | A | K | W | K | S | S | G | L | 244 |
| <i>Pca_10713/1-289</i>        | 204 | H | H | P | L | A | K | T | R | K | T | T | A | K | D | F | L | F | N | V | D | R | I | A | R | A | K | K | D | S | E | F | A | E | T | L | F | K | K | W | K | T | S | G | L | 247 |
| <i>Pin_PITG_07566T0/1-217</i> | 201 | H | D | P | L | K | K | T | T | L | T | T | P | E | A | F | L | F | - | - | - | - | - | - | - | - | - | - | - | - | - | - | - | - | - | - | - | - | - | - | - | - | - | - | - | 217 |
| <i>Pso_336774/1-303</i>       | 184 | H | Y | P | D | Q | K | A | K | D | L | A | K | A | K | L | L | F | E | D | T | M | L | L | Q | A | R | G | D | V | E | L | A | E | R | L | F | R | A | W | K | T | R | G | F | 227 |

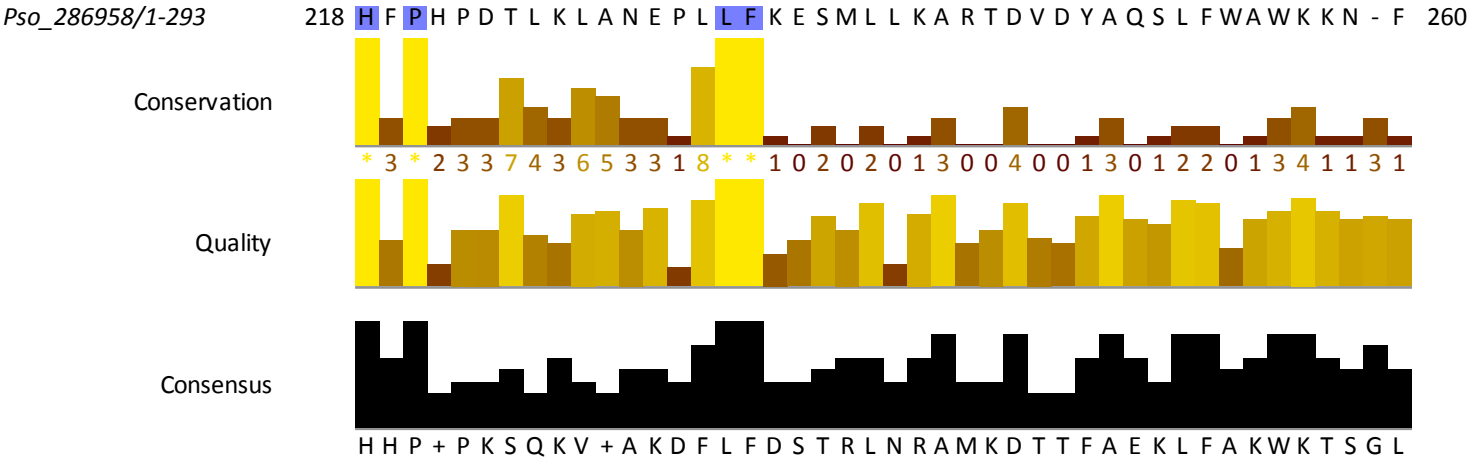

|                        |     |                                                                                         |     |
|------------------------|-----|-----------------------------------------------------------------------------------------|-----|
| Prm_Prm_81825/1-294    | 255 | D S D L V F T R F R A L G S K K G D N K L D K L Y R N Y Y D W L Q I H Y P T V G - - - - | 294 |
| Prm_Prm_81823/1-659    | 255 | D S D P V F V K F R A L G S K K G D N K L D K L Y R D Y F K W L E I H Y P T A G T V V I | 298 |
| Prm_Prm_81822/1-293    | 254 | D S D P V F V K F R A L G S K K G D N K L D K L Y R D Y F K W L E I H Y P T A G - - - - | 293 |
| Prm_Prm_78748/1-293    | 255 | D S D P V F K R F Q K M G V K T N D - K L Y Q L Y R D Y F A W L Q K N Y P T A G - - - - | 293 |
| Pin_PITG_07569T0/1-287 | 245 | D E G P V Y K K L W D M G L K K - D N A I Y K L Y T D Y V L W L D K H F P L P A - - - - | 283 |
| Pcq_10713/1-289        | 248 | D E K P V Y L K L W D M G L K T - D D E L Y K L Y K N Y V K W L D I H Y P L P A - - - - | 286 |
| Pin_PITG_07566T0/1-217 | -   | - - - - - - - - - - - - - - - - - - - - - - - - - - - - - - - - - - - - - - - - -       | -   |
| Pso_336774/1-303       | 228 | T L S E V K Q K L A - - - - K T L A N N D G K L L K Q Y T V W I N N H F P V K P - - - - | 263 |
| Pso_286958/1-293       | 261 | S L E K V T E N L K - - - - L T F A N A D N K V L R G Y T N W L I N N F - - - - - - - - | 292 |

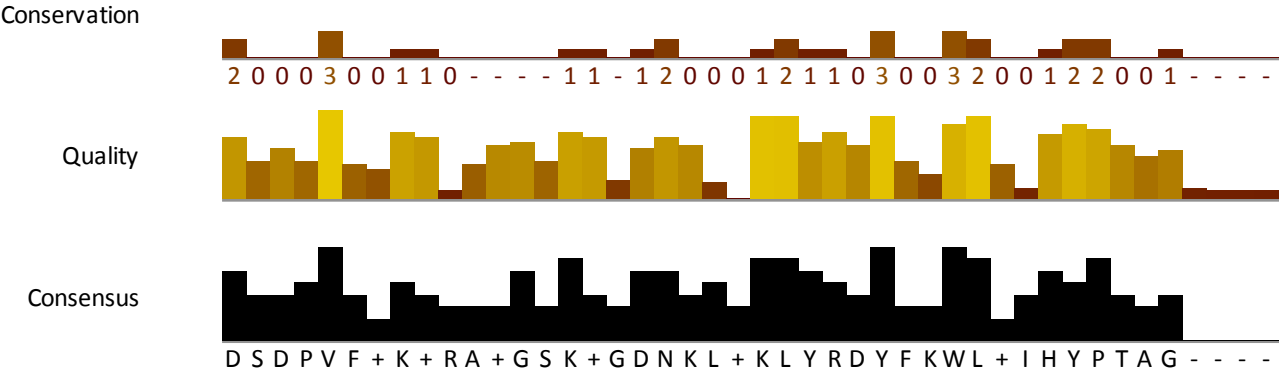

|                        |     |                                                                                         |     |
|------------------------|-----|-----------------------------------------------------------------------------------------|-----|
| Prm_Prm_81825/1-294    | -   | - - - - - - - - - - - - - - - - - - - - - - - - - - - - -                               | -   |
| Prm_Prm_81823/1-659    | 299 | N R L V I V P F A V I R R V C L Q N E Y I D V F A V L S R R T K S V S D D T K R R I Q T | 342 |
| Prm_Prm_81822/1-293    | -   | - - - - - - - - - - - - - - - - - - - - - - - - - - - - -                               | -   |
| Prm_Prm_78748/1-293    | -   | - - - - - - - - - - - - - - - - - - - - - - - - - - - - -                               | -   |
| Pin_PITG_07569T0/1-287 | -   | - - - - - - - - - - - - - - - - - - - - - - - - - - - - -                               | -   |
| Pcq_10713/1-289        | -   | - - - - - - - - - - - - - - - - - - - - - - - - - - - - -                               | -   |
| Pin_PITG_07566T0/1-217 | -   | - - - - - - - - - - - - - - - - - - - - - - - - - - - - -                               | -   |
| Pso_336774/1-303       | -   | - - - - - - - - - - - - - - - - - - - - - - - - - - - - -                               | -   |
| Pso_286958/1-293       | -   | - - - - - - - - - - - - - - - - - - - - - - - - - - - - -                               | -   |

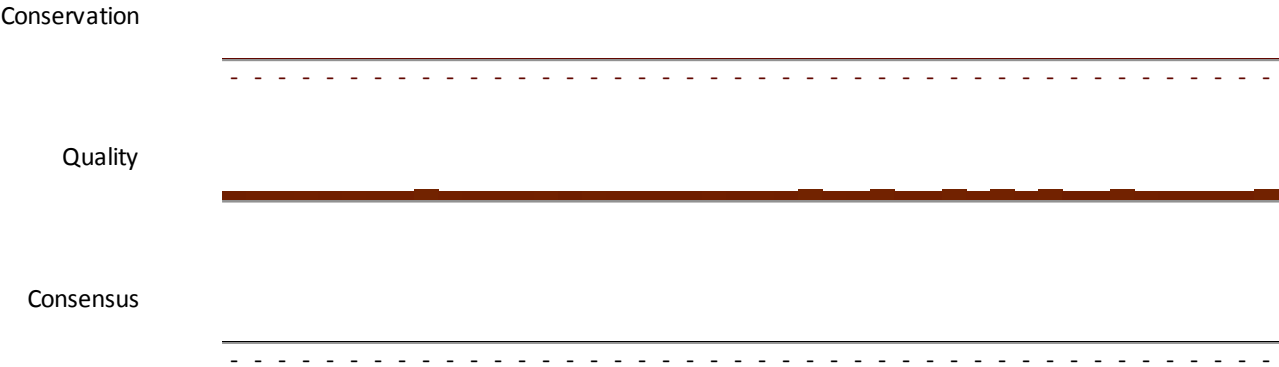

|                     |     |                                                                                         |     |
|---------------------|-----|-----------------------------------------------------------------------------------------|-----|
| Prm_Prm_81825/1-294 | -   | - - - - - - - - - - - - - - - - - - - - - - - - - - - - -                               | -   |
| Prm_Prm_81823/1-659 | 343 | L L R R W K Q I D I G I T E A A N E A K D N V K Y L F T L E K F I I P L Y N G T P S S I | 386 |

|                               |           |
|-------------------------------|-----------|
| <i>Prm_Prm_81822/1-293</i>    | - - - - - |
| <i>Prm_Prm_78748/1-293</i>    | - - - - - |
| <i>Pin_PITG_07569T0/1-287</i> | - - - - - |
| <i>Pcq_10713/1-289</i>        | - - - - - |
| <i>Pin_PITG_07566T0/1-217</i> | - - - - - |
| <i>Pso_336774/1-303</i>       | - - - - - |
| <i>Pso_286958/1-293</i>       | - - - - - |

Conservation

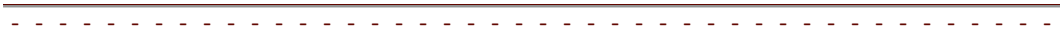

Quality

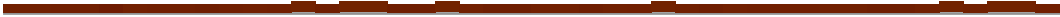

Consensus

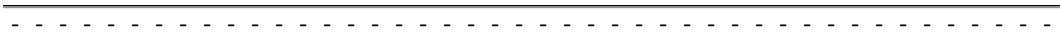

|                               |                                                                                                 |
|-------------------------------|-------------------------------------------------------------------------------------------------|
| <i>Prm_Prm_81825/1-294</i>    | - - - - -                                                                                       |
| <i>Prm_Prm_81823/1-659</i>    | 387 I D T L P A L M N S I K M I H S I A R Y Y N T T E R M A N L F T K I T N Q M I T N C K H 430 |
| <i>Prm_Prm_81822/1-293</i>    | - - - - -                                                                                       |
| <i>Prm_Prm_78748/1-293</i>    | - - - - -                                                                                       |
| <i>Pin_PITG_07569T0/1-287</i> | - - - - -                                                                                       |
| <i>Pcq_10713/1-289</i>        | - - - - -                                                                                       |
| <i>Pin_PITG_07566T0/1-217</i> | - - - - -                                                                                       |
| <i>Pso_336774/1-303</i>       | - - - - -                                                                                       |
| <i>Pso_286958/1-293</i>       | - - - - -                                                                                       |

Conservation

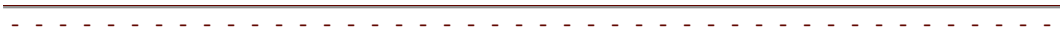

Quality

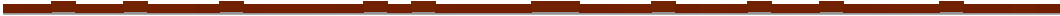

Consensus

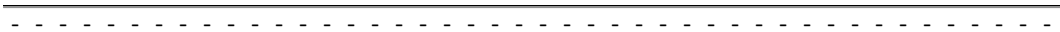

|                               |                                                                                                 |
|-------------------------------|-------------------------------------------------------------------------------------------------|
| <i>Prm_Prm_81825/1-294</i>    | - - - - -                                                                                       |
| <i>Prm_Prm_81823/1-659</i>    | 431 F M W D K D P E E L V R H L D S C L K L N E A Y Q Q Q Y R V T K D K L F A T P K G K Q F 474 |
| <i>Prm_Prm_81822/1-293</i>    | - - - - -                                                                                       |
| <i>Prm_Prm_78748/1-293</i>    | - - - - -                                                                                       |
| <i>Pin_PITG_07569T0/1-287</i> | - - - - -                                                                                       |
| <i>Pcq_10713/1-289</i>        | - - - - -                                                                                       |
| <i>Pin_PITG_07566T0/1-217</i> | - - - - -                                                                                       |
| <i>Pso_336774/1-303</i>       | - - - - -                                                                                       |
| <i>Pso_286958/1-293</i>       | - - - - -                                                                                       |

Conservation

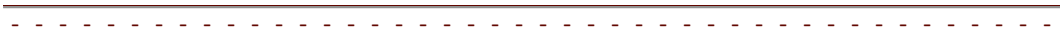

Quality

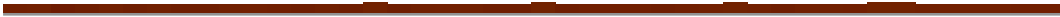

---

EFNEMKIFGKFNLFCRRVMKLI DMFTTIP PVLVA AHGRHGS AVG

---

[illegible]

---

[illegible]

---

\_\_\_\_\_

---

AGSESSAAKSTMYAKTRRLSWIFETYTDGPLVPSGSYTTGAYYY

---

---

-----

Y L L E M D D A G A I I D G E W H Q S S Y A D V S M L A C S G S S S G Y E A V G S S S T  
- - - - -  
- - - - -  
- - - - -  
- - - - -  
- - - - -  
- - - - -  
- - - - - T Q A S P I V A I L D R V E V V S G A S D G S N S I G T G E E  
- - - - -

---

| Age Group | Percentage |
|-----------|------------|
| 18-24     | ~10%       |
| 25-34     | ~10%       |
| 35-44     | ~10%       |
| 45-54     | ~10%       |
| 55-64     | ~10%       |
| 65-74     | ~10%       |
| 75-84     | ~10%       |
| 85+       | ~10%       |

-----S G - S - G -----G-----

```

- - - - -
S D R C S R E P L
- - - - -
- - - - -
- - - - - K A T N
- - - - - K A T
- - - - -
T H G S A K K P Q
- - - - - H

```

---

- - - - - K K P -

Ortholog 6

|                               |   |   |   |   |   |   |   |   |   |   |   |   |   |   |   |   |   |   |   |   |   |   |   |   |   |   |   |   |   |   |   |   |   |   |   |   |   |   |   |   |   |   |   |   |   |    |
|-------------------------------|---|---|---|---|---|---|---|---|---|---|---|---|---|---|---|---|---|---|---|---|---|---|---|---|---|---|---|---|---|---|---|---|---|---|---|---|---|---|---|---|---|---|---|---|---|----|
| <i>Prm_Prm_81908/1-154</i>    | 1 | M | R | L | I | F | W | A | L | I | V | T | - | - | L | I | S | L | L | S | S | G | E | A | A | S | - | - | - | - | T | D | K | K | Q | M | A | Q | L | D | S | D | I | G | F | 38 |
| <i>Pin_PITG_17063T0/1-160</i> | 1 | M | R | L | L | L | W | V | L | I | S | M | - | - | L | S | I | A | L | S | S | C | A | A | A | S | - | - | - | - | A | D | S | N | E | R | L | V | R | A | V | Y | S | T | V | 38 |
| <i>Prm_Prm_81907/1-154</i>    | 1 | M | R | L | I | F | W | A | L | I | V | T | - | - | L | I | S | L | L | S | S | G | E | A | A | S | - | - | - | - | T | D | K | K | Q | M | A | Q | R | D | S | E | I | V | F | 38 |
| <i>Pca_5670/1-156</i>         | 1 | M | R | L | L | L | W | T | L | L | V | I | - | - | L | V | T | I | L | S | S | C | D | A | A | S | - | - | - | - | V | N | E | N | K | S | L | Q | R | K | L | Y | T | K | V | 38 |
| <i>Pca_107349/1-160</i>       | 1 | M | R | L | L | F | W | T | L | L | V | A | - | - | L | V | A | I | L | S | S | C | D | A | A | S | - | - | - | - | V | D | E | N | K | A | L | Q | R | K | L | Y | T | K | V | 38 |
| <i>Pso_284378/1-153</i>       | 1 | M | R | L | L | L | W | V | L | L | A | T | - | - | L | V | T | L | L | S | S | A | D | A | L | S | - | I | T | N | S | D | K | K | Q | V | S | V | L | D | S | G | K | D | A | 41 |
| <i>Pca_133116/1-158</i>       | 1 | M | R | L | L | L | W | I | L | L | V | I | V | T | L | V | A | I | L | S | S | C | D | A | A | S | - | - | - | - | V | N | E | N | K | A | L | Q | R | K | L | Y | N | K | V | 40 |
| <i>Pin_PITG_18404T0/1-194</i> | 1 | M | R | P | A | L | Y | L | L | L | A | I | - | - | F | V | L | L | S | A | S | T | D | A | F | S | S | T | T | S | S | D | K | R | P | L | S | Q | L | S | R | G | S | K | Q | 42 |

Conservation

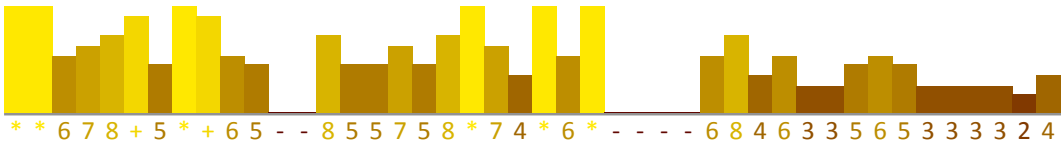

Quality

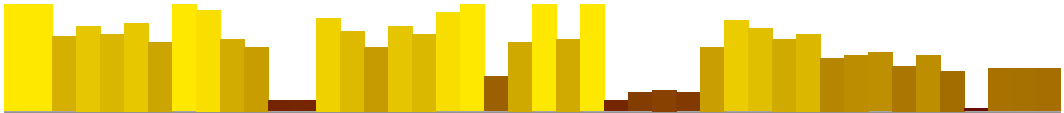

Consensus

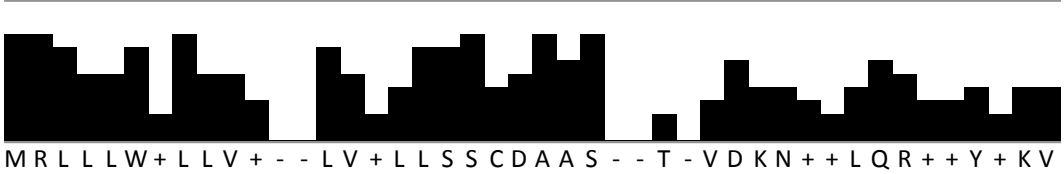

|                               |    |   |   |   |   |   |   |   |   |   |   |   |   |   |   |   |   |   |   |   |   |   |   |   |   |   |   |   |   |   |   |   |   |   |   |   |   |   |   |   |   |   |   |    |    |    |    |
|-------------------------------|----|---|---|---|---|---|---|---|---|---|---|---|---|---|---|---|---|---|---|---|---|---|---|---|---|---|---|---|---|---|---|---|---|---|---|---|---|---|---|---|---|---|---|----|----|----|----|
| <i>Prm_Prm_81908/1-154</i>    | 39 | - | - | L | S | R | - | - | - | - | - | - | - | - | D | S | E | R | L | L | R | E | G | T | K | K | I | A | D | D | D | D | E | L | A | A | D | D | E | L | A | A | D | 71 |    |    |    |
| <i>Pin_PITG_17063T0/1-160</i> | 39 | - | - | R | S | R | D | L | A | T | D | D | G | P | K | H | T | K | R | F | L | R | G | E | S | S | K | I | V | N | L | K | Q | E | E | - | - | G | V | F | E | E | R | K  | -  | 77 |    |
| <i>Prm_Prm_81907/1-154</i>    | 39 | - | - | L | P | R | E | L | A | D | N | - | - | - | K | D | G | E | R | F | L | R | T | Q | N | E | K | T | A | D | G | D | - | - | - | - | - | D | D | E | L | D | A | D  | 71 |    |    |
| <i>Pca_5670/1-156</i>         | 39 | - | - | A | S | H | A | L | A | A | D | D | G | F | E | H | D | K | R | A | L | R | G | A | S | N | - | - | - | - | - | - | - | - | - | - | - | G | V | T | E | A | R | A  | 69 |    |    |
| <i>Pca_107349/1-160</i>       | 39 | - | - | A | S | Q | A | L | A | A | D | N | - | - | R | H | G | K | R | A | L | R | G | E | S | S | K | I | A | - | - | - | - | - | P | S | - | - | S | V | T | E | A | R  | A  | 72 |    |
| <i>Pso_284378/1-153</i>       | 42 | - | - | T | S | R | M | L | T | A | D | Y | E | L | T | N | V | K | R | S | L | R | G | E | S | E | K | T | - | - | - | - | - | - | - | - | - | - | - | - | - | - | - | -  | K  | Q  | 68 |
| <i>Pca_133116/1-158</i>       | 41 | - | - | A | S | H | A | L | A | A | D | D | G | F | K | H | D | K | R | A | L | R | G | A | S | N | - | - | - | - | - | - | - | - | - | - | - | - | - | G | V | T | E | A  | R  | A  | 71 |
| <i>Pin_PITG_18404T0/1-194</i> | 43 | L | H | V | T | R | V | H | A | A | D | I | - | M | E | R | S | K | K | T | A | V | V | E | G | E | - | - | - | - | - | - | - | - | - | - | - | - | - | - | - | - | - | -  | -  | 66 |    |

Conservation

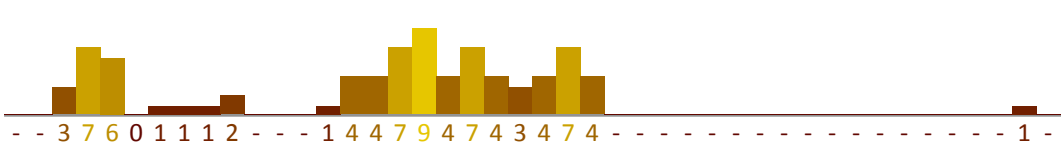

Quality

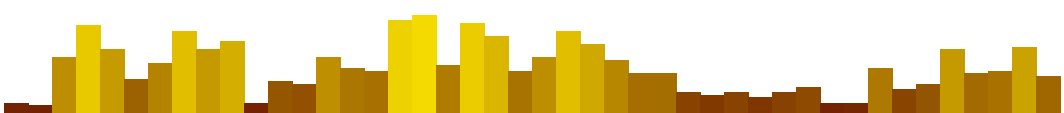

Consensus

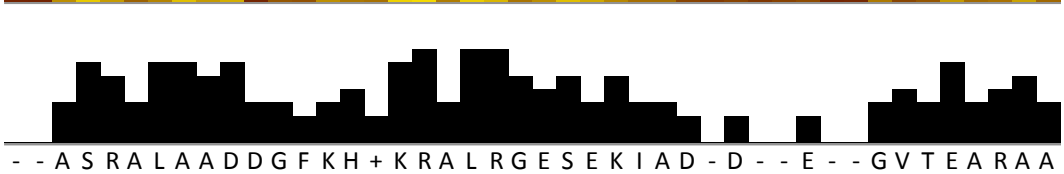

|                               |    |   |   |   |   |   |   |   |   |   |   |   |   |   |   |   |   |   |   |   |   |   |   |   |   |   |   |   |   |   |   |   |   |   |   |   |   |   |   |   |   |   |   |   |     |     |
|-------------------------------|----|---|---|---|---|---|---|---|---|---|---|---|---|---|---|---|---|---|---|---|---|---|---|---|---|---|---|---|---|---|---|---|---|---|---|---|---|---|---|---|---|---|---|---|-----|-----|
| <i>Prm_Prm_81908/1-154</i>    | 72 | D | E | E | R | - | - | A | I | M | V | K | I | R | G | S | L | S | K | L | R | A | K | Y | L | K | W | K | M | N | R | L | T | P | R | F | E | K | L | - | V | K | D | G | N   | 112 |
| <i>Pin_PITG_17063T0/1-160</i> | 78 | - | - | - | - | - | - | G | V | S | Q | K | L | T | K | A | L | Q | A | I | K | A | R | Y | L | K | W | E | Q | K | V | L | V | P | G | F | K | K | M | - | A | E | K | G | V   | 114 |
| <i>Prm_Prm_81907/1-154</i>    | 72 | D | E | E | R | - | - | G | V | M | M | K | I | R | G | F | L | S | N | L | G | A | K | Y | H | N | W | K | V | K | L | L | T | P | R | F | E | K | L | - | V | K | E | G | N   | 112 |
| <i>Pca_5670/1-156</i>         | 70 | T | V | S | T | - | - | K | F | G | S | R | L | M | A | F | F | R | S | I | K | D | K | Y | L | A | W | E | L | K | I | L | V | P | G | F | E | K | M | - | A | K | K | G | T   | 110 |
| <i>Pca_107349/1-160</i>       | 73 | T | V | S | T | - | - | G | F | G | S | K | I | M | A | F | L | R | A | I | K | E | K | Y | L | K | W | E | Q | K | I | L | A | P | S | F | K | E | K | - | A | E | K | G | T   | 113 |
| <i>Pso_284378/1-153</i>       | 69 | D | E | E | R | M | G | N | F | L | V | K | I | K | G | S | I | Q | K | L | K | D | A | Y | R | A | - | - | - | H | I | E | K | Q | F | V | K | L | D | L | I | D | K | K | 108 |     |
| <i>Pca_133116/1-158</i>       | 72 | T | V | S | T | - | - | K | F | G | S | K | I | M | A | F | F | R | S | I | K | D | K | Y | L | A | W | E | Q | K | I | L | V | P | G | F | E | K | M | - | A | K | K | G | T   | 112 |
| <i>Pin_PITG_18404T0/1-194</i> | 67 | - | D | E | R | - | - | G | I | F | V | H | F | E | M | F | I | A | Q | I | K | A | K | I | H | G | - | - | - | L | L | V | R | R | F | E | H | L | - | D | S | R | N | I | 102 |     |

Conservation

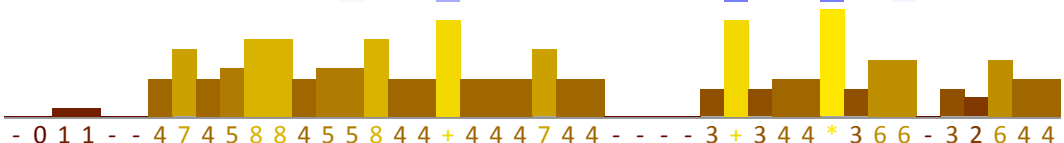

Quality

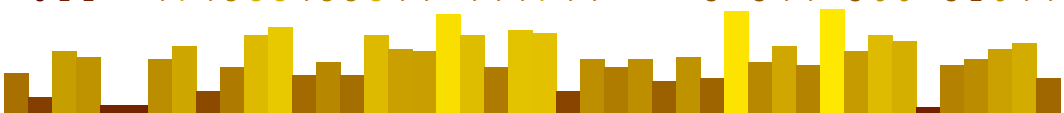



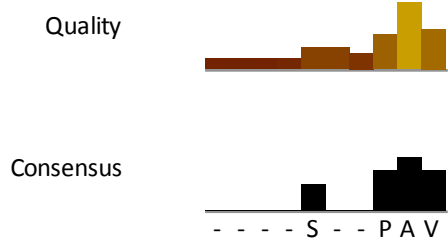

|                               |   |   |   |   |   |   |   |   |   |   |   |   |   |   |   |   |   |   |   |   |   |   |   |   |   |   |   |   |   |   |   |   |   |   |   |   |   |   |   |   |   |   |   |    |    |    |
|-------------------------------|---|---|---|---|---|---|---|---|---|---|---|---|---|---|---|---|---|---|---|---|---|---|---|---|---|---|---|---|---|---|---|---|---|---|---|---|---|---|---|---|---|---|---|----|----|----|
| <i>Pca_19144/1-140</i>        | 1 | M | R | F | S | Y | V | L | L | V | A | A | T | A | L | L | A | T | A | N | A | I | - | - | E | A | D | P | T | S | R | S | L | R | A | H | K | S | H | - | - | - | - | E  | 37 |    |
| <i>Pca_121504/1-126</i>       | 1 | M | R | F | S | Y | V | L | L | A | A | A | A | L | L | A | T | A | N | A | I | - | - | E | A | D | P | R | T | R | S | L | R | A | H | K | S | H | - | - | - | - | E | 37 |    |    |
| <i>Pca_536383/1-121</i>       | 1 | M | R | F | A | F | L | F | V | A | A | V | S | L | I | A | S | G | D | A | L | S | T | Q | A | D | A | T | S | R | H | L | R | S | H | H | Q | T | - | - | - | N | T | Y  | 41 |    |
| <i>Pin_PITG_15556T0/1-122</i> | 1 | M | R | L | S | H | V | L | L | A | V | T | T | F | V | S | S | T | N | A | Q | A | I | E | A | N | A | E | T | R | F | L | R | L | T | M | T | D | - | - | - | - | - | 38 |    |    |
| <i>Prm_Prm_82880/1-122</i>    | 1 | M | R | F | S | C | V | L | L | V | A | A | A | L | V | A | S | T | S | S | L | S | T | E | P | D | Q | E | K | R | L | L | R | S | H | K | T | A | - | - | - | D | V | D  | 41 |    |
| <i>Pso_288650/1-126</i>       | 1 | M | H | V | S | T | V | L | L | I | V | A | A | A | F | L | G | S | S | T | T | L | S | T | E | A | G | A | D | H | R | L | L | R | S | H | K | T | H | H | A | A | V | A  | 44 |    |
| <i>Pso_288648/1-115</i>       | 1 | M | R | L | S | A | V | L | L | I | V | S | A | A | F | L | A | S | S | Y | A | L | S | A | E | A | G | A | E | H | R | L | M | R | I | H | K | R | H | - | - | - | H | A  | A  | 41 |
| <i>Pso_288647/1-116</i>       | 1 | M | R | T | S | F | V | L | L | A | V | T | A | T | V | V | T | S | D | N | V | L | S | I | K | S | G | A | E | Q | R | F | L | R | S | H | R | A | H | R | T | - | H | H  | A  | 43 |

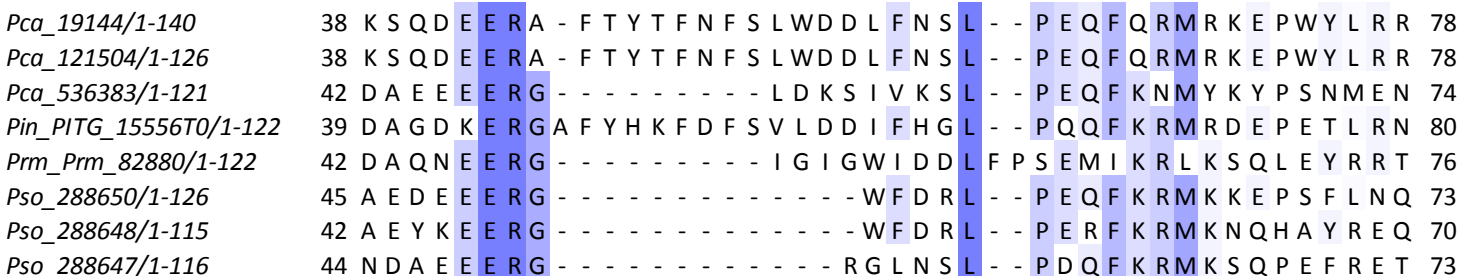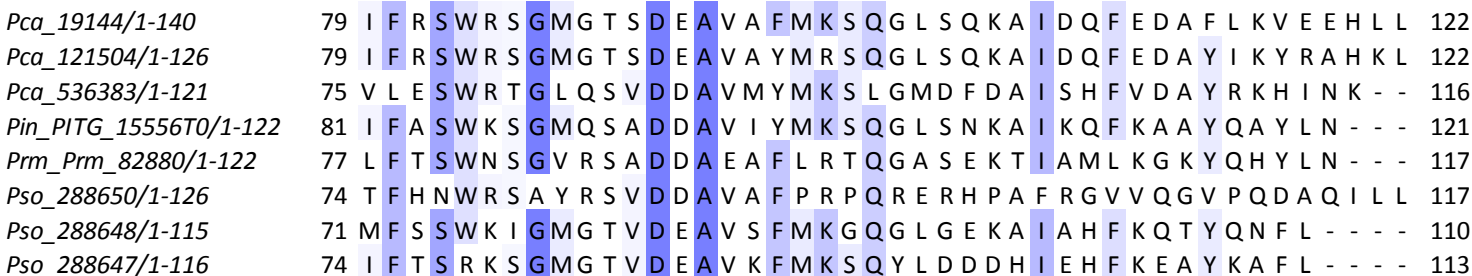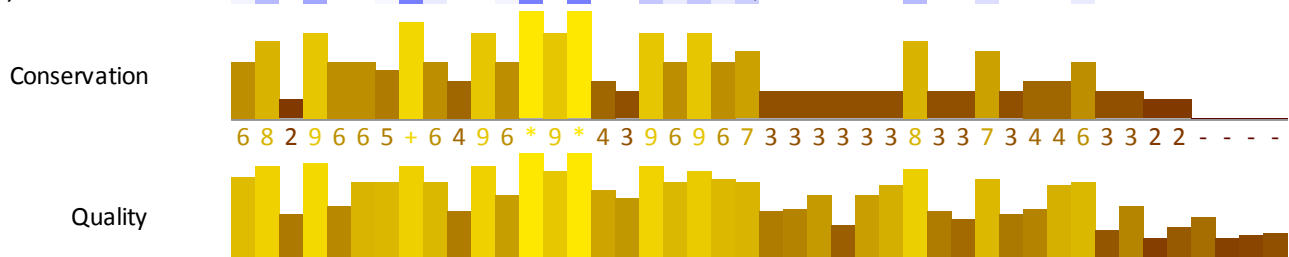



Ortholog 8

|                               |   |   |   |   |   |   |   |   |   |   |   |   |   |   |   |   |   |   |   |   |   |   |   |   |   |   |   |   |   |   |   |   |   |   |   |   |   |   |   |   |   |   |   |   |   |   |    |
|-------------------------------|---|---|---|---|---|---|---|---|---|---|---|---|---|---|---|---|---|---|---|---|---|---|---|---|---|---|---|---|---|---|---|---|---|---|---|---|---|---|---|---|---|---|---|---|---|---|----|
| <i>Pso_292791/1-147</i>       | 1 | M | R | A | F | L | I | L | L | L | V | L | V | T | L | V | A | T | - | - | - | V | A | V | S | A | S | N | H | Q | T | S | Q | N | L | N | Q | P | T | D | A | P | E | S | E | T | 42 |
| <i>Pso_288906/1-147</i>       | 1 | M | R | A | F | L | I | L | L | L | V | L | V | T | L | V | A | T | - | - | - | V | A | V | S | A | S | N | H | Q | T | S | Q | N | L | N | Q | P | T | D | A | P | E | S | E | T | 42 |
| <i>Prm_Prm_86463/1-146</i>    | 1 | M | R | A | F | F | V | L | L | A | A | V | V | I | L | V | A | S | A | N | A | V | S | G | L | N | I | N | P | Q | A | S | Q | N | L | A | N | A | A | T | D | T | H | S | N | S | 45 |
| <i>Pca_572048/1-160</i>       | 1 | M | R | S | S | F | V | L | L | V | A | V | V | A | L | L | F | R | I | D | A | A | S | G | S | S | M | K | L | R | S | G | Q | N | L | I | P | S | T | E | T | R | E | T | E | Q | 45 |
| <i>Pso_288815/1-125</i>       | 1 | M | R | A | F | I | I | L | L | M | A | V | T | A | L | L | A | S | - | - | - | V | S | G | S | V | S | N | L | Q | T | S | Q | S | L | V | Q | P | I | N | A | A | E | P | E | M | 42 |
| <i>Pso_356035/1-148</i>       | 1 | M | R | A | L | L | V | L | L | L | A | V | A | T | L | L | A | G | - | - | - | V | S | G | S | V | S | N | L | Q | T | S | Q | N | L | I | Q | P | A | D | A | V | E | S | E | S | 42 |
| <i>Pin_PITG_13093T0/1-154</i> | 1 | M | R | V | Y | F | I | L | I | L | A | V | A | T | - | - | - | - | - | - | - | V | S | G | A | T | S | E | M | L | S | F | Q | N | A | I | Q | S | S | G | G | A | K | I | E | T | 38 |
| <i>Pso_358111/1-148</i>       | 1 | M | R | A | L | L | V | L | L | L | A | V | A | T | L | L | A | G | - | - | - | V | S | G | S | V | S | N | L | Q | T | S | Q | N | L | I | Q | P | A | D | A | V | E | S | E | S | 42 |

Conservation

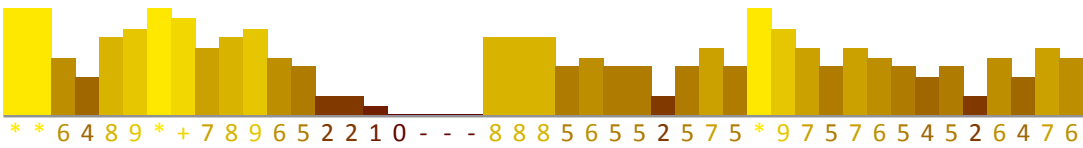

Quality

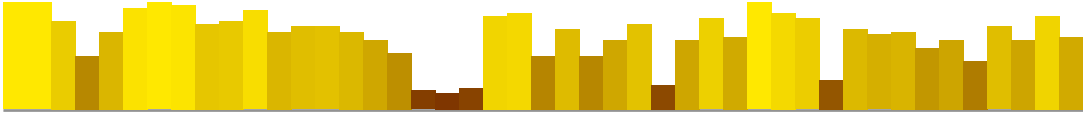

Consensus

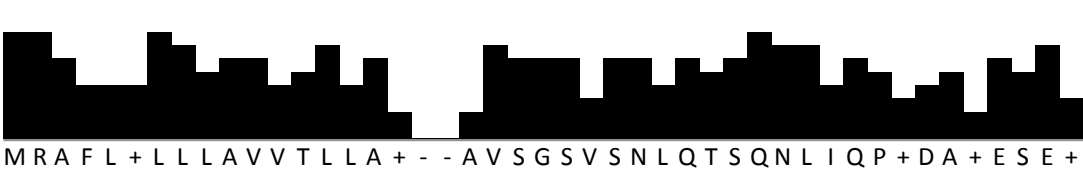

|                               |    |   |   |   |   |   |   |   |   |   |   |   |   |   |   |   |   |   |   |   |   |   |   |   |   |   |   |   |   |   |   |   |   |   |   |   |   |   |   |   |   |   |   |   |   |    |    |
|-------------------------------|----|---|---|---|---|---|---|---|---|---|---|---|---|---|---|---|---|---|---|---|---|---|---|---|---|---|---|---|---|---|---|---|---|---|---|---|---|---|---|---|---|---|---|---|---|----|----|
| <i>Pso_292791/1-147</i>       | 43 | A | Q | G | R | M | L | - | - | - | L | R | T | A | F | D | D | - | - | F | E | E | R | G | V | M | D | S | P | K | K | M | G | K | S | T | V | K | - | - | - | S | Y | H | K | 78 |    |
| <i>Pso_288906/1-147</i>       | 43 | A | Q | G | R | M | L | - | - | - | L | R | T | A | F | D | D | - | - | F | E | E | R | G | V | M | D | S | P | K | K | M | G | K | S | T | V | K | - | - | - | S | Y | H | K | 78 |    |
| <i>Prm_Prm_86463/1-146</i>    | 46 | V | - | - | R | M | L | R | A | D | A | T | T | G | E | S | I | - | - | D | E | E | R | G | I | A | D | I | A | K | K | L | G | T | K | A | K | G | F | M | K | D | R | Y | H | W  | 86 |
| <i>Pca_572048/1-160</i>       | 46 | I | - | G | R | V | L | - | - | - | R | G | E | A | E | S | D | P | E | S | E | E | R | G | I | T | D | L | A | K | L | L | G | T | K | S | K | T | M | F | D | N | N | A | L | A  | 86 |
| <i>Pso_288815/1-125</i>       | 43 | T | Q | G | R | L | L | - | - | - | L | R | T | A | P | V | D | - | - | D | E | E | R | G | A | V | E | V | I | K | E | L | G | K | S | T | K | K | A | T | K | D | T | L | H | K  | 82 |
| <i>Pso_356035/1-148</i>       | 43 | T | Q | G | R | M | L | - | - | - | L | R | T | A | G | V | D | - | - | E | E | E | R | G | I | L | D | V | V | K | K | L | G | T | S | T | A | K | W | P | K | N | T | Y | H | K  | 82 |
| <i>Pin_PITG_13093T0/1-154</i> | 39 | S | A | G | R | L | L | R | A | E | L | T | T | D | E | T | Y | - | - | P | E | E | R | T | S | L | A | A | V | E | K | L | N | A | K | T | K | D | V | L | K | D | K | W | D | A  | 81 |
| <i>Pso_358111/1-148</i>       | 43 | T | Q | G | R | M | L | - | - | - | L | R | T | A | G | V | D | - | - | E | E | E | R | G | I | L | D | V | V | K | K | L | G | T | S | T | A | K | W | P | K | N | T | Y | H | K  | 82 |

Conservation

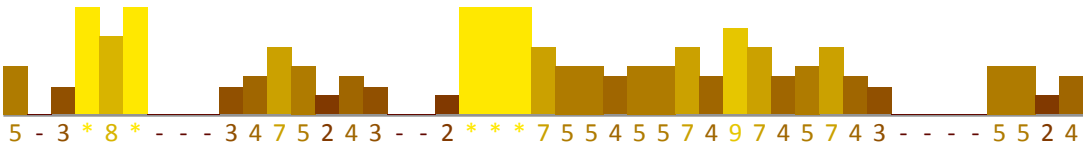

Quality

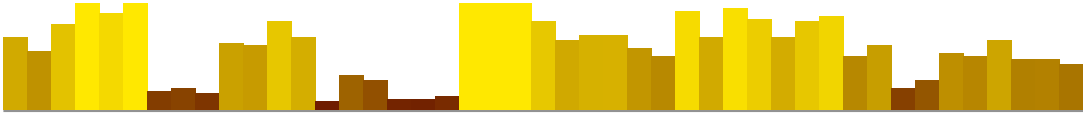

Consensus

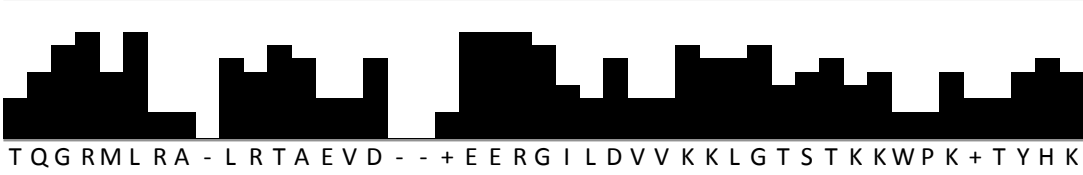

|                               |    |   |   |   |   |   |   |   |   |   |   |   |   |   |   |   |   |   |   |   |   |   |   |   |   |   |   |   |   |   |   |   |   |   |   |   |   |   |   |   |   |   |   |   |   |    |    |
|-------------------------------|----|---|---|---|---|---|---|---|---|---|---|---|---|---|---|---|---|---|---|---|---|---|---|---|---|---|---|---|---|---|---|---|---|---|---|---|---|---|---|---|---|---|---|---|---|----|----|
| <i>Pso_292791/1-147</i>       | 79 | V | G | L | D | G | Y | V | N | I | K | S | G | A | L | D | - | - | - | M | E | K | T | T | S | T | F | L | T | K | S | F | N | P | D | Q | V | H | K | W | L | Q | L | - | - | -  | 11 |
| <i>Pso_288906/1-147</i>       | 79 | V | G | L | D | G | Y | V | N | I | K | S | G | A | L | D | - | - | - | M | E | K | T | T | S | T | F | L | T | K | S | F | N | P | D | Q | V | H | K | W | L | Q | L | - | - | -  | 11 |
| <i>Prm_Prm_86463/1-146</i>    | 87 | L | - | - | - | Y | V | H | W | K | S | S | A | M | N | - | - | - | Q | D | E | T | A | K | L | F | L | K | K | N | I | H | P | D | K | V | K | K | W | L | G | A | - | - | - | 12 |    |
| <i>Pca_572048/1-160</i>       | 87 | T | - | - | - | I | V | R | L | K | S | Q | F | A | T | - | - | - | A | D | D | A | V | Q | A | F | M | T | R | N | I | N | P | D | A | V | Y | K | W | L | K | L | Y | K | A | 12 |    |
| <i>Pso_288815/1-125</i>       | 83 | I | - | - | - | Y | V | K | S | Y | Q | G | L | E | N | S | A | L | I | D | Q | V | A | E | L | S | L | R | K | S | F | N | P | N | Q | V | Y | K | W | L | N | L | - | - | - | 12 |    |
| <i>Pso_356035/1-148</i>       | 83 | L | - | - | - | Y | V | N | F | M | S | G | M | M | D | - | - | - | I | E | K | T | A | N | A | F | L | K | K | N | I | N | P | D | K | V | F | K | W | L | K | L | - | - | - | 11 |    |
| <i>Pin_PITG_13093T0/1-154</i> | 82 | A | - | - | - | N | V | K | Y | Q | S | P | F | I | Y | - | - | - | N | D | G | I | G | Q | S | I | M | K | R | N | I | D | P | D | K | V | F | K | Y | L | T | Q | - | - | - | 11 |    |
| <i>Pso_358111/1-148</i>       | 83 | L | - | - | - | Y | V | N | F | M | S | G | M | M | D | - | - | - | I | E | K | T | A | N | A | F | L | K | K | N | I | N | P | D | K | V | F | K | W | L | K | L | - | - | - | 11 |    |

Conservation

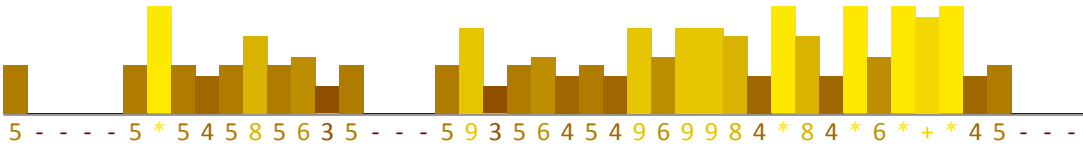

Quality

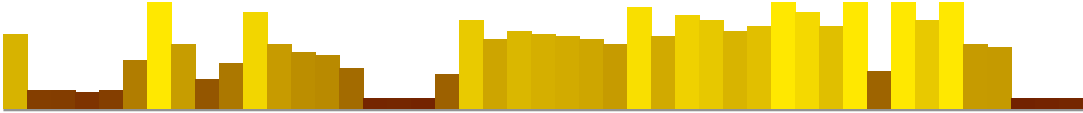

Consensus

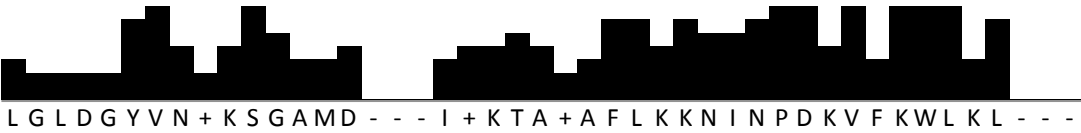

|                               |     |   |   |   |   |   |   |   |   |   |   |   |   |   |   |   |   |   |   |   |   |   |   |   |   |   |   |   |   |   |   |   |   |   |   |   |   |   |   |   |     |     |   |   |     |
|-------------------------------|-----|---|---|---|---|---|---|---|---|---|---|---|---|---|---|---|---|---|---|---|---|---|---|---|---|---|---|---|---|---|---|---|---|---|---|---|---|---|---|---|-----|-----|---|---|-----|
| <i>Pso_292791/1-147</i>       | 118 | - | - | - | - | D | D | G | R | S | S | W | H | V | R | E | F | M | T | C | T | R | R | S | - | - | I | W | Y | P | G | W | K | S | R | F | - | - | - | N | 147 |     |   |   |     |
| <i>Pso_288906/1-147</i>       | 118 | - | - | - | - | D | D | G | R | S | S | W | H | V | R | E | F | M | T | C | T | R | R | S | - | - | I | W | Y | P | G | W | K | S | R | F | - | - | - | N | 147 |     |   |   |     |
| <i>Prm_Prm_86463/1-146</i>    | 122 | - | - | - | - | D | K | V | G | D | G | - | P | E | L | E | L | F | L | K | Y | K | S | L | W | D | S | V | H | R | - | - | - | - | - | - | - | - | - | K | 146 |     |   |   |     |
| <i>Pca_572048/1-160</i>       | 125 | N | N | Q | V | V | K | K | T | G | D | A | A | P | E | Y | L | L | W | I | R | Y | A | K | E | Y | K | D | A | H | P | K | W | V | S | K | L | - | - | - | -   | 160 |   |   |     |
| <i>Pso_288815/1-125</i>       | 121 | - | - | - | - | D | - | - | - | - | - | - | - | - | - | - | - | - | - | - | - | - | - | - | - | - | - | - | - | - | - | - | - | - | - | - | - | K | I | V | -   | -   | - | R | 125 |
| <i>Pso_356035/1-148</i>       | 118 | - | - | - | - | S | N | G | D | Y | T | - | H | E | R | K | L | Y | D | L | Y | K | E | K | Y | I | A | K | H | P | G | W | T | S | K | L | - | - | - | S | 148 |     |   |   |     |
| <i>Pin_PITG_13093T0/1-154</i> | 117 | - | - | Q | K | L | D | R | T | I | G | E | N | P | Q | Y | G | L | W | K | A | Y | L | E | L | W | K | K | N | H | P | R | W | K | S | K | L | Q | T | V | D   | 154 |   |   |     |
| <i>Pso_358111/1-148</i>       | 118 | - | - | - | - | S | N | G | D | Y | T | - | H | E | R | K | L | Y | D | L | Y | K | E | K | Y | I | A | K | H | P | G | W | T | S | K | L | - | - | - | S | 148 |     |   |   |     |

Conservation

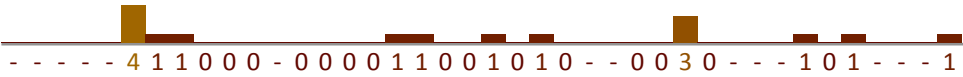

Quality

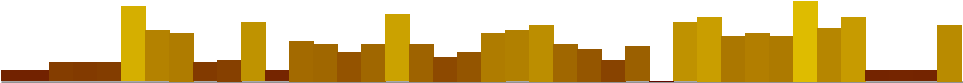

Consensus

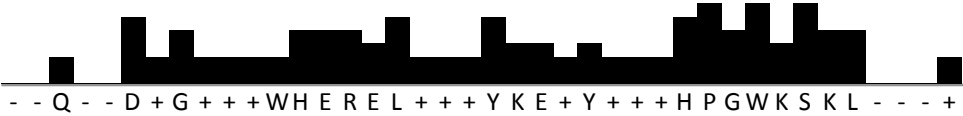

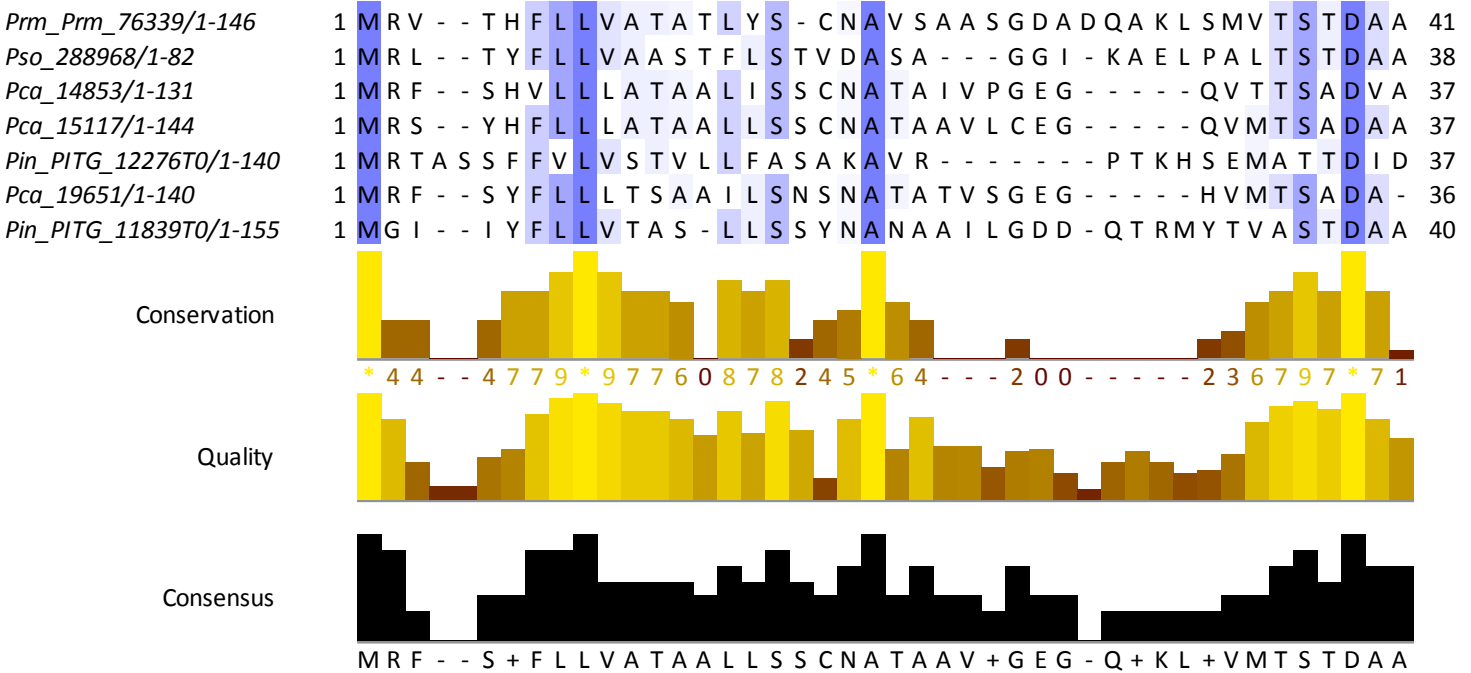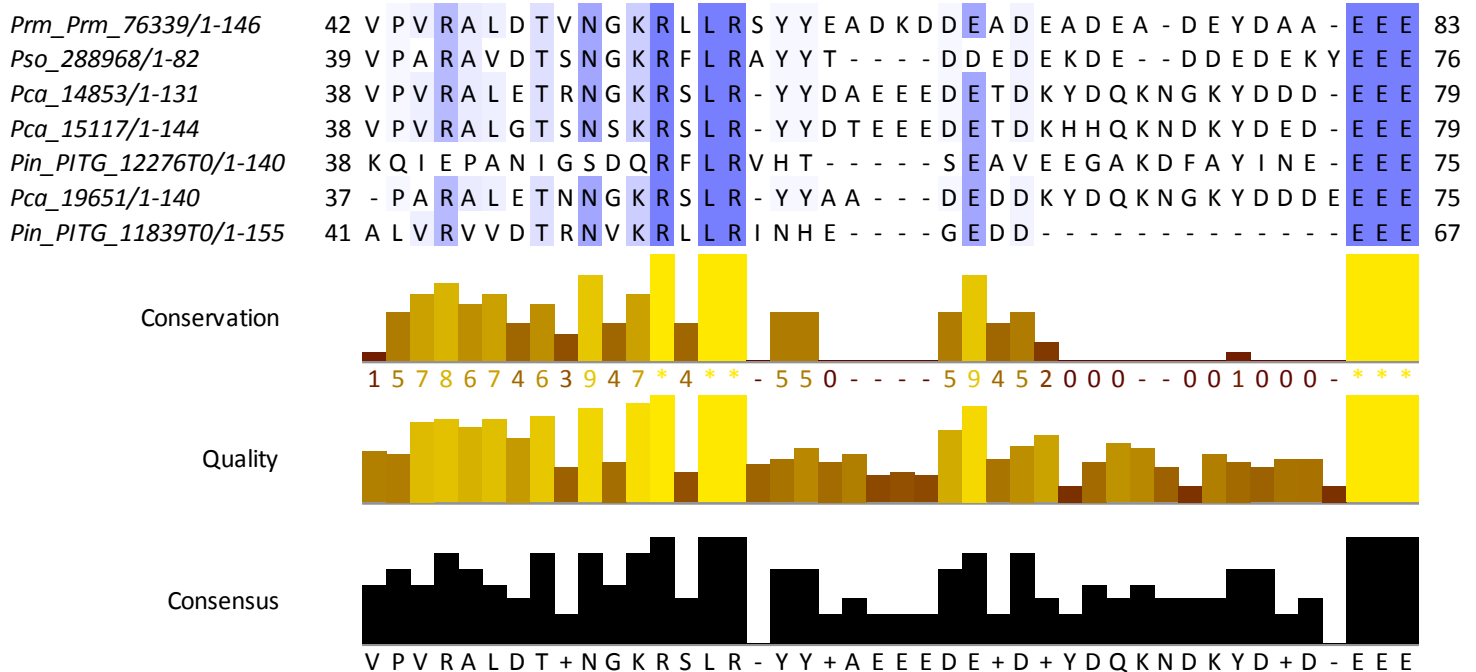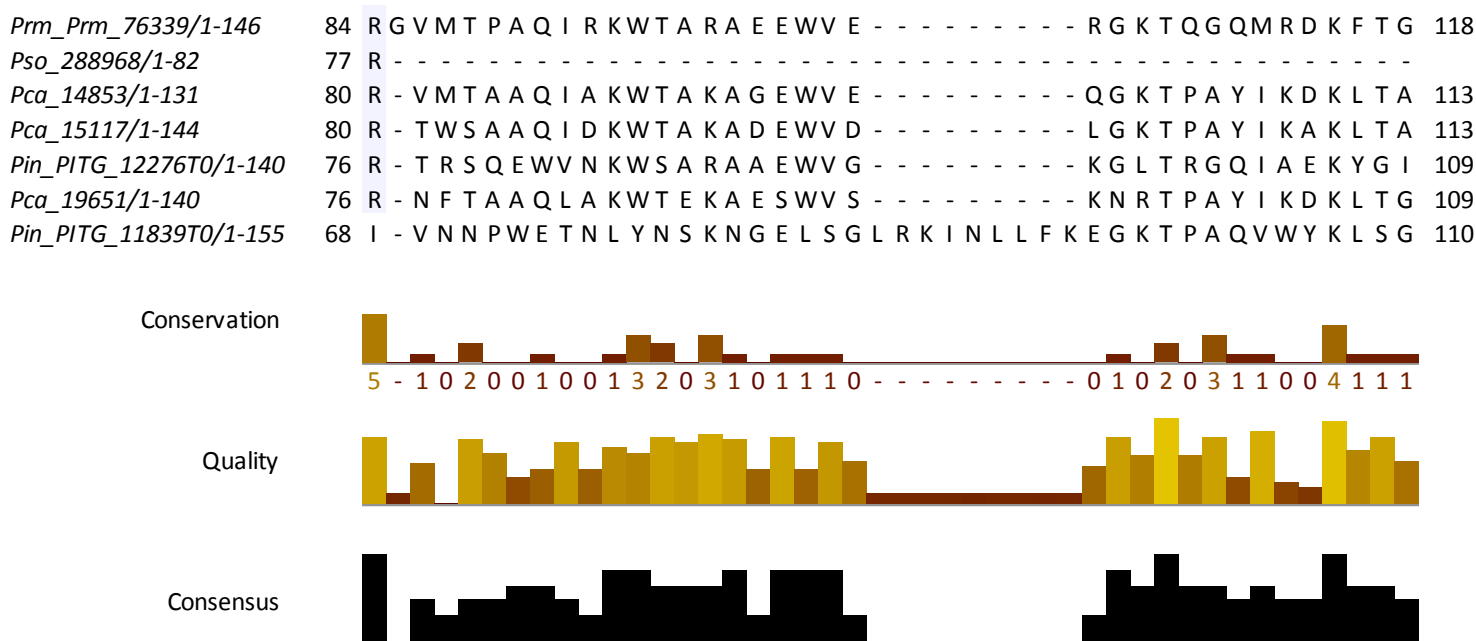

R - V M T A A Q I + K W T A K A + E W V + - - - - - K G K T P A + I K D K L T G

|                               |     |                                                                                               |     |
|-------------------------------|-----|-----------------------------------------------------------------------------------------------|-----|
| <i>Prm_76339/1-146</i>        | 119 | L R G V M N - - - A K D K E K Y N L F L A A Y L R - - - - - - - - - - - A H P - -             | 143 |
| <i>Pso_288968/1-82</i>        | 78  | - - - - - - - - - - - - - - - - - - - - - - - - - - - - - - - - - - A N P - -                 | 80  |
| <i>Pca_14853/1-131</i>        | 114 | F N G V M S - - - D K N K E K I L S V - - - - - - - - - - - - - - - - - - - - -               | 129 |
| <i>Pca_15117/1-144</i>        | 114 | F N G V M S - - - D K N R K K Y E L F L A K W G R - - - - - - - - - - - - - - - - - A N P D E | 140 |
| <i>Pin_PITG_12276T0/1-140</i> | 110 | K K G R R T D P R S K N K Q K Y N L F L A A S L K - - - - - - - - - - - - - - - - - K H P - - | 137 |
| <i>Pca_19651/1-140</i>        | 110 | M N G L M T - - - A E N R K K Y E L F T A A Y G R - - - - - - - - - - - - - - - - - A N P H A | 136 |
| <i>Pin_PITG_11839T0/1-155</i> | 111 | L G A G M I - - - Q K N G M K F N L F F L Q S I T L C I P A T L A S Q D E V L A I S H S       | 151 |

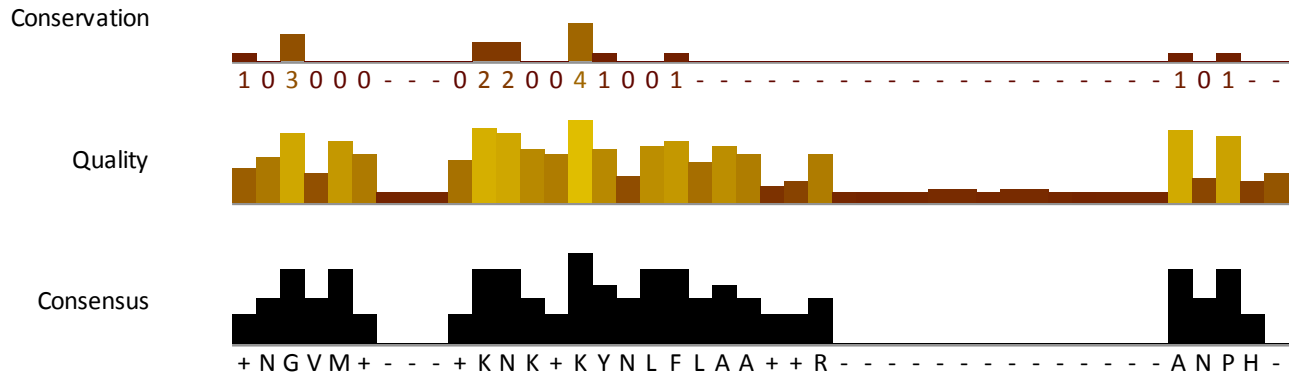

|                               |     |   |   |   |   |     |
|-------------------------------|-----|---|---|---|---|-----|
| <i>Prm_Prm_76339/1-146</i>    | 144 | - | G | G | I | 146 |
| <i>Pso_288968/1-82</i>        | 81  | - | - | D | L | 82  |
| <i>Pca_14853/1-131</i>        | 130 | - | - | R | G | 131 |
| <i>Pca_15117/1-144</i>        | 141 | F | G | R | R | 144 |
| <i>Pin_PITG_12276T0/1-140</i> | 138 | - | G | G | I | 140 |
| <i>Pca_19651/1-140</i>        | 137 | L | D | R | L | 140 |
| <i>Pin_PITG_11839T0/1-155</i> | 152 | L | N | I | T | 155 |

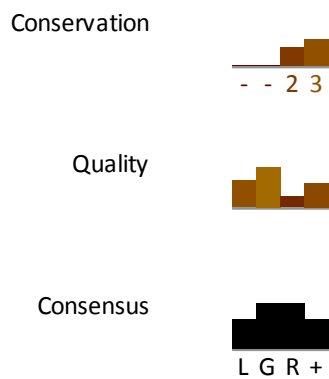

Ortholog 10

|                               |   |   |   |   |   |   |   |   |   |   |   |   |   |   |   |   |   |   |   |   |   |   |   |   |   |   |   |   |   |   |   |   |   |   |   |   |   |   |   |   |   |   |   |    |    |    |
|-------------------------------|---|---|---|---|---|---|---|---|---|---|---|---|---|---|---|---|---|---|---|---|---|---|---|---|---|---|---|---|---|---|---|---|---|---|---|---|---|---|---|---|---|---|---|----|----|----|
| <i>Prm_Prm_77945/1-264</i>    | 1 | M | R | L | L | D | H | V | L | L | T | T | V | V | T | L | L | A | S | - | - | - | - | T | Y | A | A | A | Q | T | K | I | S | A | V | T | S | H | S | S | P | N | W | G  | 39 |    |
| <i>Pso_353461/1-305</i>       | 1 | M | R | L | Q | Q | - | A | F | L | V | V | V | A | S | L | F | A | S | A | V | V | A | L | S | A | A | T | E | I | E | Q | A | K | S | S | T | L | L | - | - | - | - | -  | S  | 38 |
| <i>Pin_PITG_07558T0/1-244</i> | 1 | M | R | S | I | Q | - | L | L | I | I | A | L | V | A | F | L | A | C | - | - | - | - | C | S | A | T | P | A | P | P | Q | V | S | L | S | F | L | - | - | - | - | - | 32 |    |    |
| <i>Pca_97196/1-253</i>        | 1 | M | R | F | P | I | - | I | A | L | A | A | L | V | A | F | L | S | T | - | - | - | - | L | D | A | S | S | L | L | V | Q | A | A | S | D | K | L | - | - | - | - | - | 32 |    |    |
| <i>Prm_Prm_77948/1-266</i>    | 1 | M | R | L | L | D | H | I | L | L | A | T | V | V | T | L | L | A | S | - | - | - | - | T | Y | A | A | A | Q | T | K | I | S | A | V | T | S | H | S | S | P | N | W | G  | 39 |    |
| <i>Pca_538116/1-150</i>       | 1 | M | R | F | P | I | - | V | A | L | A | V | V | V | A | F | L | S | T | - | - | - | - | L | D | V | S | S | L | L | V | Q | A | A | G | D | K | I | - | - | - | - | - | 32 |    |    |
| <i>Pin_PITG_07556T0/1-239</i> | 1 | M | R | S | L | E | - | A | L | I | I | T | L | V | V | L | L | A | C | - | - | - | - | N | S | A | F | S | I | A | Q | G | L | S | L | S | T | H | - | - | - | - | - | 32 |    |    |

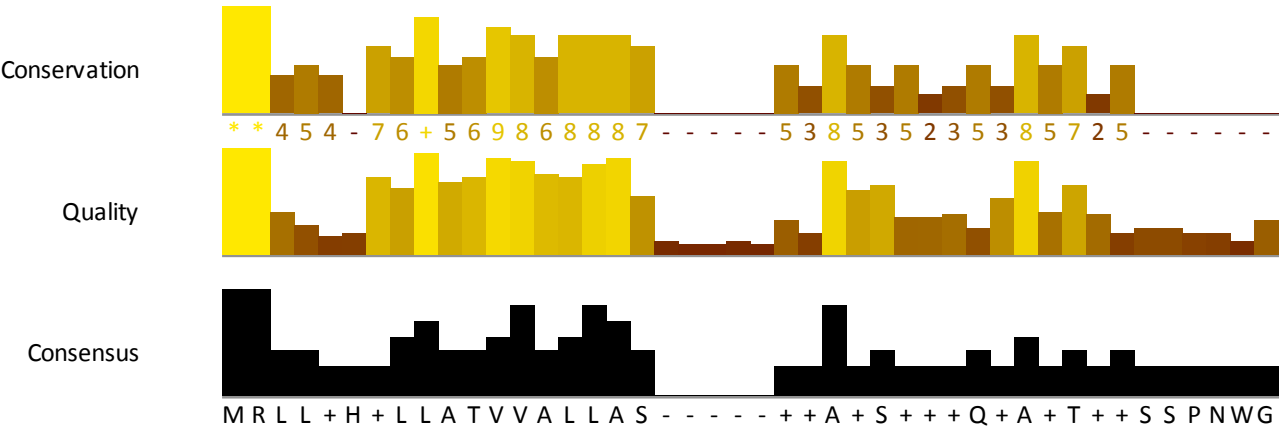

|                               |    |   |   |   |   |   |   |   |   |   |   |   |   |   |   |   |   |   |   |   |   |   |   |   |   |   |   |   |   |   |   |   |   |   |   |   |   |   |   |   |   |   |    |    |    |    |
|-------------------------------|----|---|---|---|---|---|---|---|---|---|---|---|---|---|---|---|---|---|---|---|---|---|---|---|---|---|---|---|---|---|---|---|---|---|---|---|---|---|---|---|---|---|----|----|----|----|
| <i>Prm_Prm_77945/1-264</i>    | 40 | D | E | L | V | R | D | R | N | G | A | N | N | G | R | S | L | R | V | N | A | N | T | - | - | - | - | - | - | - | - | - | - | A | G | A | T | W | L | E | N | L | -  | -  | -  | 70 |
| <i>Pso_353461/1-305</i>       | 39 | S | Q | S | I | V | V | H | E | G | A | - | K | G | R | S | L | R | A | - | - | - | V | D | T | E | D | - | - | E | S | S | E | L | R | G | W | W | - | - | - | - | -  | -  | 69 |    |
| <i>Pin_PITG_07558T0/1-244</i> | 33 | - | - | - | - | - | - | - | - | P | V | Q | R | R | S | L | R | T | D | T | T | L | D | S | E | D | N | N | E | D | S | G | E | R | S | V | W | - | - | - | - | - | -  | -  | 60 |    |
| <i>Pca_97196/1-253</i>        | 33 | - | - | - | - | - | - | - | - | N | S | G | R | S | L | R | I | A | A | G | T | G | L | E | Q | - | - | - | D | E | E | R | G | S | L | I | T | K | I | R | T | T | 62 |    |    |    |
| <i>Prm_Prm_77948/1-266</i>    | 40 | E | E | L | V | R | D | R | N | G | A | N | N | G | R | S | L | R | V | G | T | N | T | - | - | - | - | - | - | V | E | E | R | V | T | W | L | E | K | L | - | - | -  | 72 |    |    |
| <i>Pca_538116/1-150</i>       | 33 | - | - | - | - | - | - | - | - | S | S | G | R | S | L | R | I | A | A | D | T | G | L | E | Q | - | - | - | D | E | E | R | G | S | L | I | T | K | I | R | T | T | 62 |    |    |    |
| <i>Pin_PITG_07556T0/1-239</i> | 33 | - | - | - | - | - | - | - | - | A | I | R | M | R | S | L | Q | A | G | I | T | P | D | T | E | D | K | T | K | D | S | E | E | R | S | L | Y | - | - | - | - | - | -  | 60 |    |    |

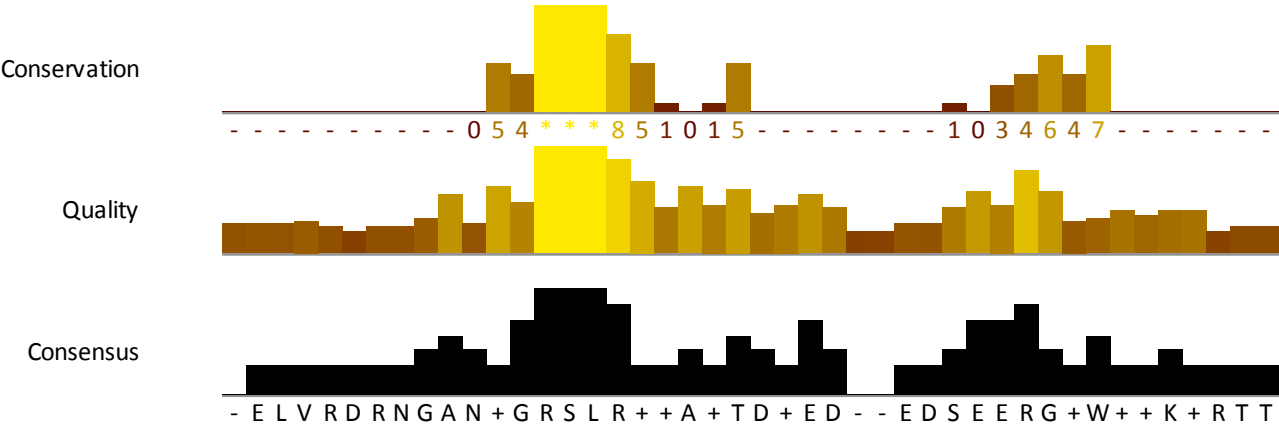

|                               |    |   |   |   |   |   |   |   |   |   |   |   |   |   |   |   |   |   |   |   |   |   |   |   |   |   |   |   |   |   |   |   |   |   |   |   |   |   |   |   |   |   |   |   |    |    |
|-------------------------------|----|---|---|---|---|---|---|---|---|---|---|---|---|---|---|---|---|---|---|---|---|---|---|---|---|---|---|---|---|---|---|---|---|---|---|---|---|---|---|---|---|---|---|---|----|----|
| <i>Prm_Prm_77945/1-264</i>    | 71 | - | G | K | H | A | K | V | F | W | W | L | E | T | E | K | T | D | D | Y | V | L | K | A | L | N | L | K | G | L | S | G | S | D | L | T | K | N | D | N | Y | K | Y | F | L  | 11 |
| <i>Pso_353461/1-305</i>       | 70 | - | - | T | S | A | K | V | R | W | W | L | E | S | E | K | S | D | D | Y | V | K | G | A | L | K | L | K | G | L | E | G | D | A | L | L | N | H | K | N | Y | K | A | F | Q  | 11 |
| <i>Pin_PITG_07558T0/1-244</i> | 61 | - | - | K | H | V | K | V | R | W | W | L | E | T | E | K | S | D | D | F | V | R | K | A | L | K | L | N | G | L | D | D | T | A | M | K | A | H | K | N | Y | K | Y | A | 10 |    |
| <i>Pca_97196/1-253</i>        | 63 | F | S | K | K | A | R | V | D | E | W | A | K | A | E | K | S | D | D | F | V | R | K | A | L | K | L | E | N | V | A | D | D | H | L | W | A | M | K | N | Y | P | Y | L | 10 |    |
| <i>Prm_Prm_77948/1-266</i>    | 73 | - | G | K | N | A | K | V | R | W | W | L | E | T | E | K | T | D | D | Y | V | L | K | A | L | N | L | K | G | L | T | G | S | D | L | T | K | N | A | N | Y | K | Y | F | L  | 11 |
| <i>Pca_538116/1-150</i>       | 63 | F | S | K | K | A | K | V | D | E | W | A | K | A | E | K | S | D | D | F | V | R | K | A | L | K | M | E | N | V | A | D | N | N | L | W | A | T | K | N | Y | P | L | Y | L  | 10 |
| <i>Pin_PITG_07556T0/1-239</i> | 61 | - | - | K | L | L | K | V | Q | W | W | I | S | A | K | K | S | D | E | Y | V | K | Q | A | L | K | L | D | E | L | D | D | A | A | L | K | E | H | K | N | L | K | Y | F | T  | 10 |

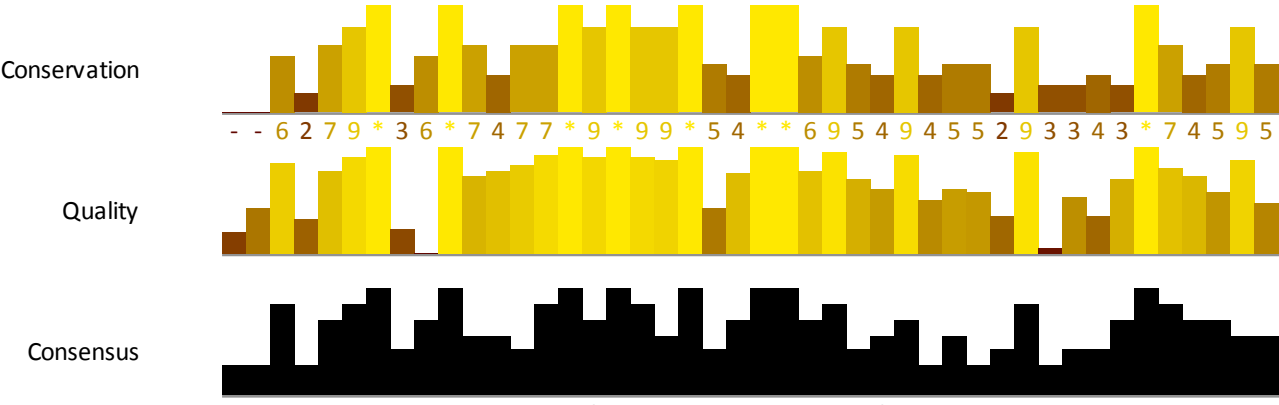

F + K + A K V R W W L E + E K S D D Y V R K A L K L K G L + D + A L + A H K N Y K Y F L

|                               |     |   |   |   |   |   |   |   |   |   |   |   |   |   |   |   |   |   |   |   |   |   |   |   |   |   |   |   |   |   |   |   |   |   |   |   |   |   |   |   |   |   |   |   |   |     |
|-------------------------------|-----|---|---|---|---|---|---|---|---|---|---|---|---|---|---|---|---|---|---|---|---|---|---|---|---|---|---|---|---|---|---|---|---|---|---|---|---|---|---|---|---|---|---|---|---|-----|
| <i>Prm_Prm_77945/1-264</i>    | 114 | K | F | A | K | K | A | E | S | Y | R | L | N | K | W | L | R | N | D | F | P | T | Y | E | A | W | K | E | L | G | L | Q | K | - | V | R | T | I | E | Q | L | N | Q | I | R | 156 |
| <i>Pso_353461/1-305</i>       | 112 | Y | F | L | K | K | S | E | D | Y | K | I | N | K | W | Y | R | N | E | Y | T | T | Y | Q | G | W | Q | E | L | G | L | N | K | K | I | T | L | G | K | D | L | D | K | I | R | 155 |
| <i>Pin_PITG_07558T0/1-244</i> | 103 | Y | F | A | K | K | A | E | D | Y | L | F | N | K | W | L | R | N | H | V | P | T | F | E | A | W | K | S | L | N | L | G | K | - | I | T | K | A | D | Q | L | K | E | I | A | 145 |
| <i>Pca_97196/1-253</i>        | 107 | R | F | L | E | K | T | E | A | K | K | I | N | D | W | L | I | G | D | V | P | T | Y | G | A | W | V | K | L | G | L | G | S | - | I | - | - | - | D | D | I | E | K | V | K | 146 |
| <i>Prm_Prm_77948/1-266</i>    | 116 | K | F | A | K | K | A | E | S | N | R | R | A | M | W | V | R | K | D | F | P | T | Y | Q | V | W | K | E | L | G | L | Q | G | - | V | R | T | V | E | Q | L | N | Q | I | R | 158 |
| <i>Pca_538116/1-150</i>       | 107 | R | F | L | E | K | A | E | A | A | K | I | K | N | W | L | I | G | D | V | S | T | Y | G | A | W | A | K | L | G | L | N | S | - | L | - | - | - | D | D | M | D | K | A | K | 146 |
| <i>Pin_PITG_07556T0/1-239</i> | 103 | Y | F | Q | Y | E | K | R | H | N | L | L | S | K | A | F | R | R | N | L | P | T | F | E | V | W | K | K | L | N | L | D | K | - | I | T | S | R | D | Q | L | K | D | I | Y | 145 |

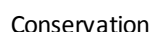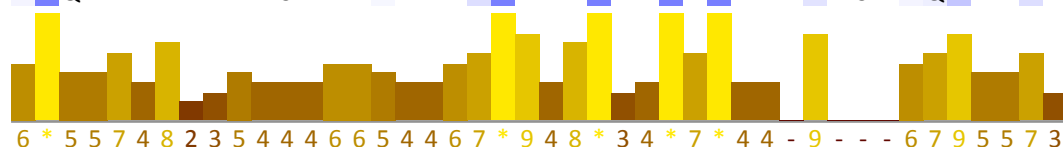

6 \* 5 5 7 4 8 2 3 5 4 4 4 6 6 5 4 4 6 7 \* 9 4 8 \* 3 4 \* 7 \* 4 4 - 9 - - - 6 7 9 5 5 7 3

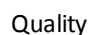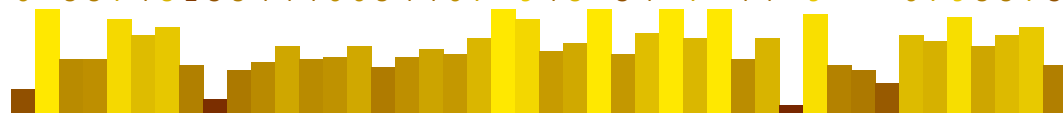

## Consensus

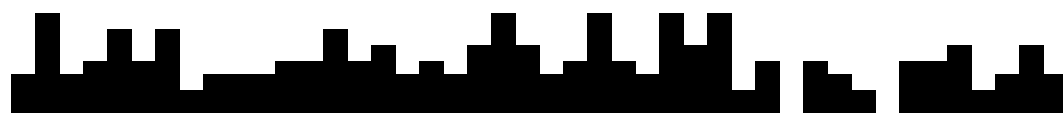

Y F + K K A F + Y K | N K W | B N D V P T Y F A W K + | G | + K - | T T - D Q | + K | B

|                               |     |   |   |   |   |   |   |   |   |   |   |   |   |   |   |   |   |   |   |   |   |   |   |   |   |   |   |   |   |   |   |   |   |   |   |   |   |   |   |   |   |   |     |   |     |     |
|-------------------------------|-----|---|---|---|---|---|---|---|---|---|---|---|---|---|---|---|---|---|---|---|---|---|---|---|---|---|---|---|---|---|---|---|---|---|---|---|---|---|---|---|---|---|-----|---|-----|-----|
| <i>Prm_Prm_77945/1-264</i>    | 157 | N | T | K | E | F | G | I | Y | K | R | Y | V | N | E | F | D | D | Y | V | Y | R | S | M | V | A | G | Y | N | P | - | P | K | V | M | V | S | G | A | T | K | A | E   | M | 199 |     |
| <i>Pso_353461/1-305</i>       | 156 | N | T | D | E | F | K | V | Y | K | H | Y | V | N | Y | F | D | K | F | V | L | I | S | L | K | A | G | D | K | P | - | P | K | W | M | V | A | R | G | P | S | D | A   | E | M   | 198 |
| <i>Pin_PITG_07558T0/1-244</i> | 146 | N | T | K | N | F | I | S | Y | S | R | F | V | K | Q | Y | D | D | N | V | S | T | L | N | A | G | Y | N | P | - | P | V | V | A | V | A | R | G | A | S | E | A | E   | I | 188 |     |
| <i>Pca_97196/1-253</i>        | 147 | T | T | A | A | F | K | T | Y | E | K | F | V | K | E | Y | D | D | Q | A | I | A | L | W | K | D | Y | K | I | P | - | - | - | I | P | V | A | K | A | T | S | P | T   | E | M   | 187 |
| <i>Prm_Prm_77948/1-266</i>    | 159 | N | T | K | V | F | A | V | Y | K | R | Y | V | N | E | F | D | N | Y | V | Y | R | S | M | V | A | G | Y | N | P | - | P | K | V | M | V | A | R | G | A | P | K | A   | E | M   | 201 |
| <i>Pca_538116/1-150</i>       | 147 | R | A | A | A | - | - | - | - | - | - | - | - | - | - | - | - | - | - | - | - | - | - | - | - | - | - | - | - | - | - | - | - | - | - | - | - | - | - | - | - | - | 150 |   |     |     |
| <i>Pin_PITG_07556T0/1-239</i> | 146 | Q | A | A | D | F | R | A | Y | S | R | Y | V | K | M | F | D | N | S | V | V | G | L | V | N | G | G | V | G | T | V | P | R | V | M | I | A | R | G | A | T | D | P   | E | I   | 189 |

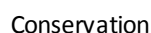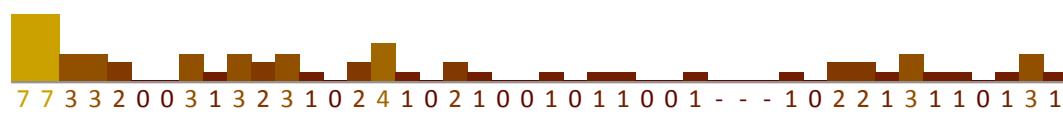

7 7 3 3 2 0 0 3 1 3 2 3 1 0 2 4 1 0 2 1 0 0 1 0 1 1 0 0 1 - - - 1 0 2 2 1 3 1 1 0 1 3 1

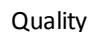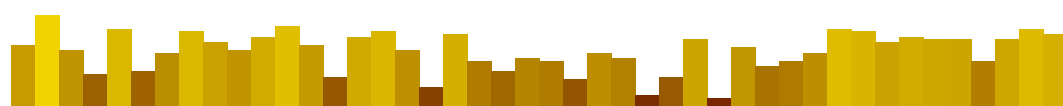

## Consensus

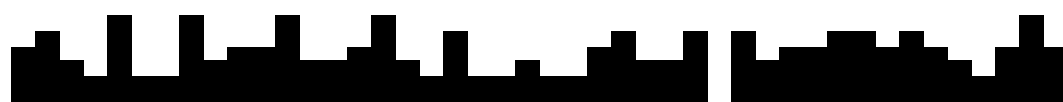

NT++FKVYKRYV+EFDDYV+RS++AGYNP-PKVMVARGAS+AEM

|                               |     |                                                                                           |     |
|-------------------------------|-----|-------------------------------------------------------------------------------------------|-----|
| <i>Prm_Prm_77945/1-264</i>    | 200 | T A R V E I M A E A K R S E A Y A K V A L G L T V - - P G R P R L T L T G K P L E K H D   | 241 |
| <i>Pso_353461/1-305</i>       | 199 | T A R T E I M A E A R R P A K Y A K L A L G L T E T T D N S K L K L L T D K A L E E S S   | 242 |
| <i>Pin_PITG_07558T0/1-244</i> | 189 | T A R T M I M A S A R R D D D V A K V L L G L T K - - P G Y P R R V L D G N A L T Q H D   | 230 |
| <i>Pca_97196/1-253</i>        | 188 | N A R M D I L A A A K R G D D Y A K K V L G L D N - - - - - V T G S A L I S H V           | 222 |
| <i>Prm_Prm_77948/1-266</i>    | 202 | T A R V E I M A E A K R S E L Y A K V A L G L T V - - P G R R G I T L K G E A L K K H D   | 243 |
| <i>Pca_538116/1-150</i>       | -   | - - - - - - - - - - - - - - - - - - - - - - - - - - - - - - - - - - - - - - - - -         | -   |
| <i>Pin_PITG_07556T0/1-239</i> | 190 | T A R T I L M A R E G R S D N V A K V L L G L T E - - A D D P P F R V L S G A K L I Q H Q | 231 |

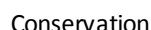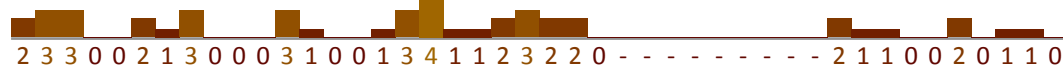

2 3 3 0 0 2 1 3 0 0 0 3 1 0 0 1 3 4 1 1 2 3 2 2 0 - - - - - 2 1 1 0 0 2 0 1 1 0

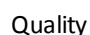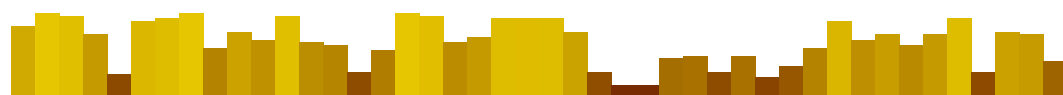

## Consensus

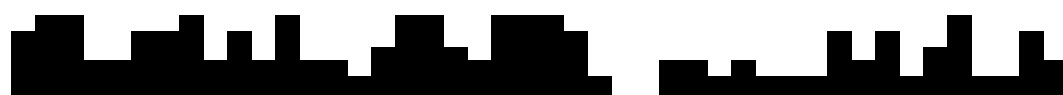

T A R T E I M A E A K R S D D Y A K V A L G L T + - - P G R P R R + L T G K A L + + H D

|                               |     |                                                                                         |     |
|-------------------------------|-----|-----------------------------------------------------------------------------------------|-----|
| <i>Prm_Prm_77945/1-264</i>    | 242 | N Y G Y F K L F L A E A A K V A K S T N K V - - - - -                                   | 263 |
| <i>Pso_353461/1-305</i>       | 243 | D F K Y F V L F L K K K E P V L T E E L K K L E A R V L P N Q L R S N K R Y Q E L L E E | 286 |
| <i>Pin_PITG_07558T0/1-244</i> | 231 | E Y K Y Y Q L F K E A K T - - - - -                                                     | 243 |
| <i>Pca_97196/1-253</i>        | 223 | N Y Q Y F E H Y R R T V K R L Q D P K K K L N R L P T I - - - - -                       | 250 |
| <i>Prm_Prm_77948/1-266</i>    | 244 | D Y G Y F E L F L A E A A K V A K T P I K V - - - - -                                   | 265 |
| <i>Pca_538116/1-150</i>       |     | - - - - -                                                                               |     |
| <i>Pin_PITG_07556T0/1-239</i> | 232 | D Y K Y F E L F - - - - -                                                               | 239 |

Conservation

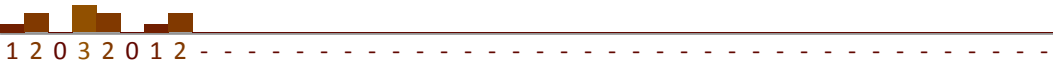

Quality

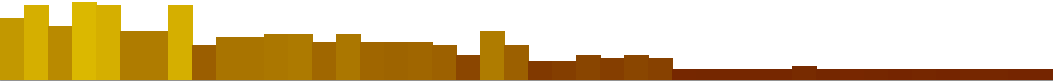

Consensus

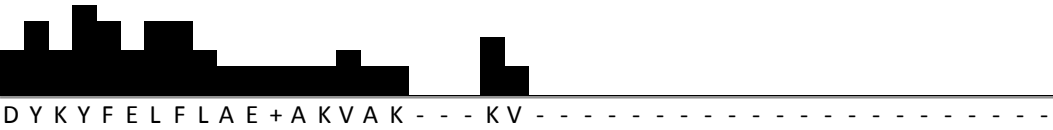

|                               |                                           |     |
|-------------------------------|-------------------------------------------|-----|
| <i>Prm_Prm_77945/1-264</i>    | - - - - - A                               | 264 |
| <i>Pso_353461/1-305</i>       | 287 M G W V K K Y V T A A N A G G A P R G | 305 |
| <i>Pin_PITG_07558T0/1-244</i> | - - - - - S                               | 244 |
| <i>Pca_97196/1-253</i>        | 251 - - - - - T E R                       | 253 |
| <i>Prm_Prm_77948/1-266</i>    | - - - - - A                               | 266 |
| <i>Pca_538116/1-150</i>       | - - - - -                                 |     |
| <i>Pin_PITG_07556T0/1-239</i> | - - - - -                                 |     |

Conservation

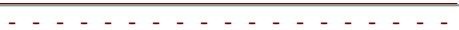

Quality

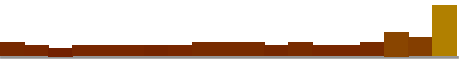

Consensus

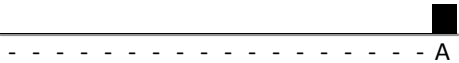

Ortholog 11

|                               |   |   |   |   |   |   |   |   |   |   |   |   |   |   |   |   |   |   |   |   |   |   |   |   |   |   |   |   |   |   |   |   |   |   |   |   |   |   |   |   |   |   |   |   |    |    |
|-------------------------------|---|---|---|---|---|---|---|---|---|---|---|---|---|---|---|---|---|---|---|---|---|---|---|---|---|---|---|---|---|---|---|---|---|---|---|---|---|---|---|---|---|---|---|---|----|----|
| <i>Pso_284479/1-147</i>       | 1 | M | R | F | C | Y | F | A | L | A | A | A | T | L | V | A | C | T | N | A | V | S | A | E | T | Q | - | - | - | L | S | Q | T | I | P | E | L | V | A | R | T | L | A | D | 41 |    |
| <i>Pin_PITG_02900T0/1-158</i> | 1 | M | R | F | Y | Y | V | V | L | A | V | T | A | T | L | L | A | S | V | K | A | V | S | T | N | A | Y | Q | N | Q | I | S | Q | T | A | S | D | S | V | V | G | - | - | - | -  | 40 |
| <i>Pin_PITG_10654T0/1-153</i> | 1 | M | R | F | F | Y | V | A | L | A | V | A | A | T | L | L | A | S | T | D | A | T | P | T | D | S | Q | Q | K | - | - | S | N | L | R | K | S | V | I | A | K | V | G | V | D  | 42 |
| <i>Pin_PITG_12952T0/1-150</i> | 1 | M | R | F | Y | I | A | F | L | A | T | A | A | T | I | L | V | S | T | N | A | A | T | V | D | A | Q | H | N | W | V | S | K | T | T | P | E | L | V | T | T | T | H | I | D  | 44 |
| <i>Prm_Prm_80526/1-157</i>    | 1 | M | R | F | F | Y | V | T | L | V | A | A | V | T | L | L | A | S | A | N | A | V | S | T | - | - | K | Q | N | Q | I | S | E | T | S | P | E | I | V | A | R | S | L | A | A  | 42 |
| <i>Pca_548556/1-165</i>       | 1 | M | R | L | N | C | F | L | F | V | V | A | A | L | V | A | S | T | N | A | A | A | S | S | I | Q | Q | N | H | V | S | Q | T | T | P | D | I | Q | A | A | T | Q | T | D | 44 |    |

Conservation

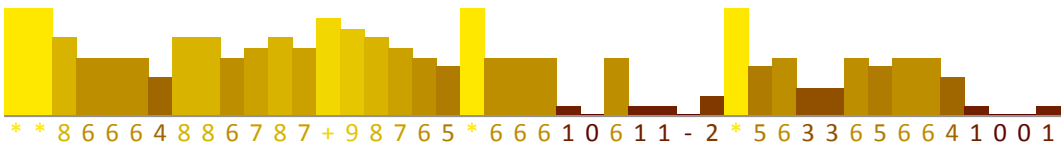

Quality

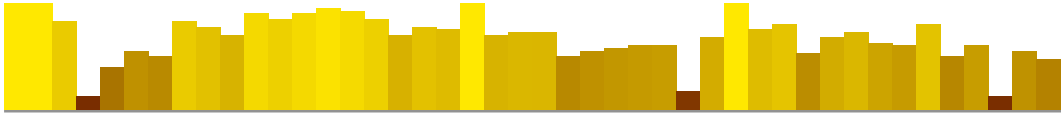

Consensus

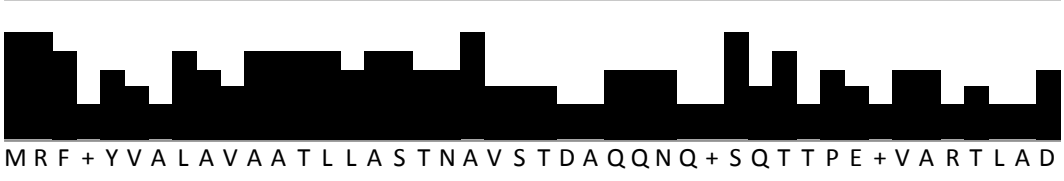

M R F + Y V A L A V A A T L L A S T N A V S T D A Q Q N Q + S Q T T P E + V A R T L A D

|                               |    |   |   |   |   |   |   |   |   |   |   |   |   |   |   |   |   |   |   |   |   |   |   |   |   |   |   |   |   |   |   |   |   |   |   |   |   |   |   |   |   |   |    |    |   |    |
|-------------------------------|----|---|---|---|---|---|---|---|---|---|---|---|---|---|---|---|---|---|---|---|---|---|---|---|---|---|---|---|---|---|---|---|---|---|---|---|---|---|---|---|---|---|----|----|---|----|
| <i>Pso_284479/1-147</i>       | 42 | A | P | I | N | D | A | V | K | R | S | L | R | R | H | A | - | - | - | - | - | - | - | - | - | - | - | - | T | L | D | E | E | E | R | G | G | G | G | Y | N | T | 70 |    |   |    |
| <i>Pin_PITG_02900T0/1-158</i> | 41 | - | - | - | - | - | - | V | K | R | S | L | R | S | H | K | V | N | K | E | E | K | E | - | - | - | - | D | L | V | D | S | R | E | D | V | E | E | R | K | G | G | V  | I  | S | 74 |
| <i>Pin_PITG_10654T0/1-153</i> | 43 | - | - | - | - | - | - | A | K | R | S | L | R | S | S | E | - | - | E | E | P | A | A | - | - | - | - | - | - | P | L | V | G | L | E | E | R | G | G | G | L | N | S  | 70 |   |    |
| <i>Pin_PITG_12952T0/1-150</i> | 45 | - | - | - | - | - | - | V | K | R | S | L | R | S | H | Q | H | E | D | E | S | N | D | - | - | - | - | D | S | A | S | P | Q | V | D | K | E | E | R | E | N | G | I  | M  | W | 78 |
| <i>Prm_Prm_80526/1-157</i>    | 43 | A | Q | D | D | A | A | V | K | R | N | L | R | K | Y | V | E | E | D | D | L | D | S | L | D | S | L | D | S | L | D | S | F | D | E | T | E | E | R | A | K | V | I  | N  | V | 86 |
| <i>Pca_548556/1-165</i>       | 45 | S | - | - | - | - | V | V | K | R | S | L | R | Y | V | K | - | - | D | E | E | D | S | - | - | - | - | - | - | I | D | T | K | D | E | E | R | V | Q | G | I | N | V  | 74 |   |    |

Conservation

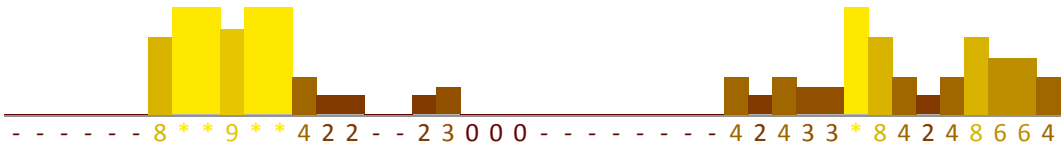

Quality

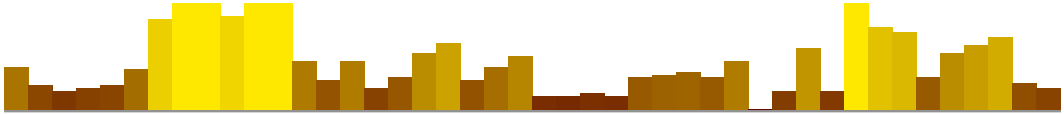

Consensus

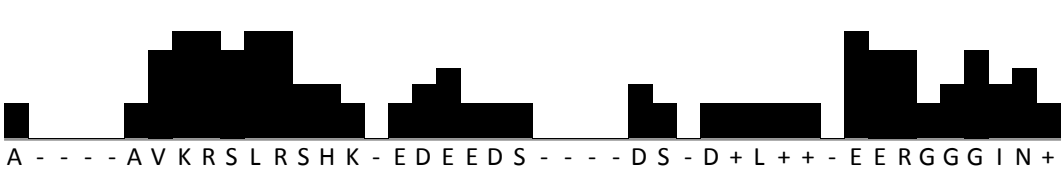

A - - - - A V K R S L R S H K - E D E E D S - - - - D S - D + L + + - E E R G G G I N +

|                               |    |   |   |   |   |   |   |   |   |   |   |   |   |   |   |   |   |   |   |   |   |   |   |   |   |   |   |   |   |   |   |   |   |   |   |   |   |   |   |   |   |   |   |   |     |     |
|-------------------------------|----|---|---|---|---|---|---|---|---|---|---|---|---|---|---|---|---|---|---|---|---|---|---|---|---|---|---|---|---|---|---|---|---|---|---|---|---|---|---|---|---|---|---|---|-----|-----|
| <i>Pso_284479/1-147</i>       | 71 | K | M | L | V | D | L | A | K | S | K | N | N | K | L | P | G | I | A | K | L | S | K | S | G | Q | K | T | V | I | N | T | W | R | K | Q | S | K | N | L | E | S | V | Y | 114 |     |
| <i>Pin_PITG_02900T0/1-158</i> | 75 | S | K | L | M | K | I | V | K | D | R | N | T | P | I | N | L | D | I | T | K | L | N | L | N | Q | Q | K | I | V | D | I | L | S | G | Q | T | R | T | L | E | R | F | A | 118 |     |
| <i>Pin_PITG_10654T0/1-153</i> | 71 | D | K | L | W | K | L | V | K | S | H | E | A | - | I | P | V | E | I | A | K | L | S | D | N | V | Q | E | K | I | A | G | V | L | M | A | Q | N | L | S | L | E | K | F | A   | 113 |
| <i>Pin_PITG_12952T0/1-150</i> | 79 | N | K | L | M | K | D | I | K | D | P | N | K | F | I | K | A | D | L | T | L | L | S | A | K | Q | L | K | H | I | K | S | V | L | E | K | Q | D | R | T | Q | K | Q | V | S   | 122 |
| <i>Prm_Prm_80526/1-157</i>    | 87 | K | Q | L | K | Q | L | A | K | T | K | N | A | H | L | P | V | K | F | E | N | L | N | A | K | M | Q | Q | N | M | V | S | S | W | A | K | K | N | L | N | E | V | K | F | A   | 130 |
| <i>Pca_548556/1-165</i>       | 75 | K | E | L | N | K | I | L | S | A | K | R | I | E | I | P | A | N | I | E | A | L | S | K | K | A | Q | R | D | L | V | H | T | F | K | G | Q | D | L | T | K | K | M | F | A   | 118 |

Conservation

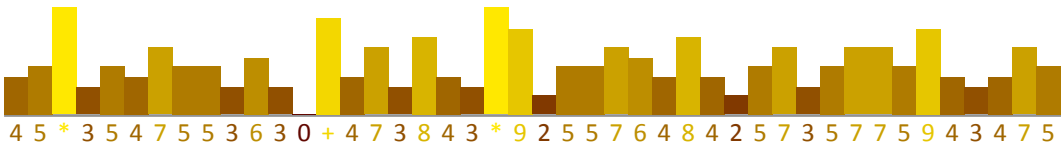

Quality

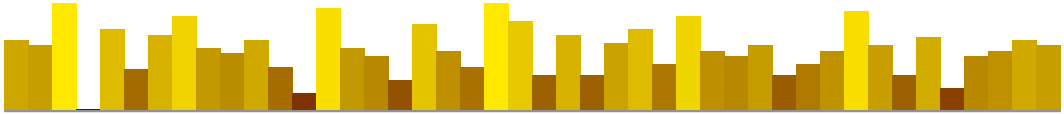

Consensus

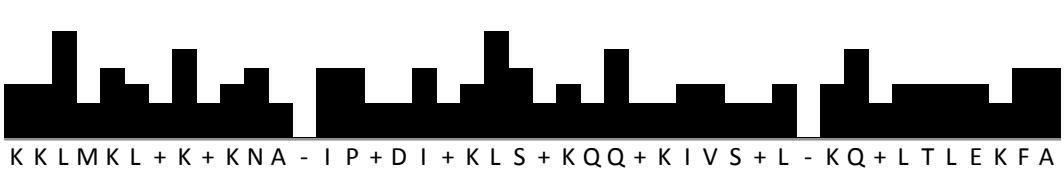

K K L M K L + K + K N A - I P + D I + K L S + K Q Q + K I V S + L - K Q + L T L E K F A

|                               |     |   |   |   |   |   |   |   |   |   |   |   |   |   |   |   |   |   |   |   |   |   |   |   |   |   |   |   |   |   |   |   |   |   |   |   |   |   |   |   |   |   |   |   |     |
|-------------------------------|-----|---|---|---|---|---|---|---|---|---|---|---|---|---|---|---|---|---|---|---|---|---|---|---|---|---|---|---|---|---|---|---|---|---|---|---|---|---|---|---|---|---|---|---|-----|
| <i>Pso_284479/1-147</i>       | 115 | K | M | L | G | M | K | S | I | A | D | V | K | H | P | N | Y | P | V | F | Q | R | F | E | K | L | - | - | - | A | K | K | Q | T | N | I | A | - | - | - | - | - | - | - | 147 |
| <i>Pin_PITG_02900T0/1-158</i> | 119 | K | K | L | G | M | K | S | I | A | D | V | K | H | P | N | Y | P | V | F | Q | R | F | E | K | L | - | - | - | A | K | K | Q | T | N | I | A | - | - | - | - | - | - | - | 158 |

Pin\_PITG\_02900T0/1-158 119 K K L G I R S A L D I I H K S Y P F F K I W S L H F L D G K R K P R K V S E F W I - - - - 158  
Pin\_PITG\_10654T0/1-153 114 K K V G M D G A H D T A H R N N P F F Q K W K A N F L D G K K P K K I P E E W I - - - - 153  
Pin\_PITG\_12952T0/1-150 123 K K L G - - - - - - - - N Q N S K F V E E W K E S F R V R K K P K P Q W - - - - - - 150  
Prm\_Prm\_80526/1-157 131 K K L G L K S V N D V G N K N Y P A F Q K F R E M F T - - - - - - - - - - - - 157  
Pca\_548556/1-165 119 T K L G M R D V D D V A N R H Y P F F E K W E H L F R P G K K E K K V P E M L I G N H E 162

Conservation

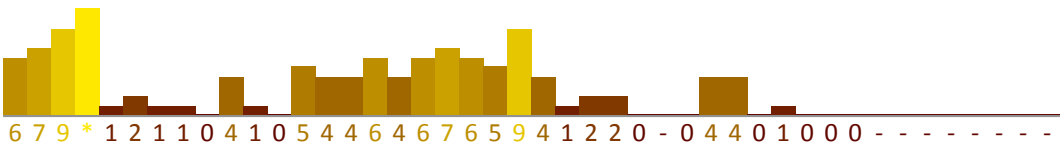

Quality

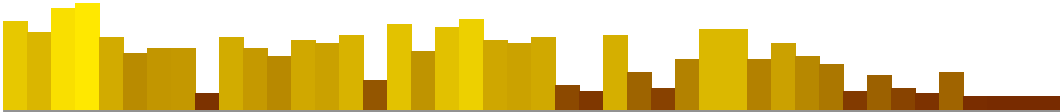

Consensus

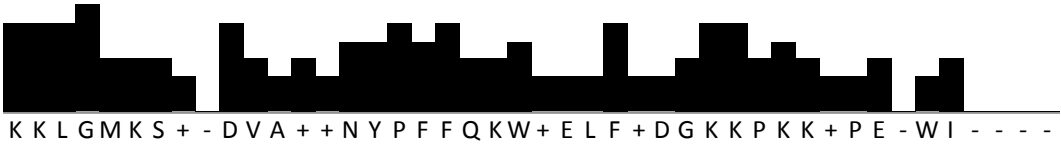

Pso\_284479/1-147 - - -  
Pin\_PITG\_02900T0/1-158 - - -  
Pin\_PITG\_10654T0/1-153 - - -  
Pin\_PITG\_12952T0/1-150 - - -  
Prm\_Prm\_80526/1-157 - - -  
Pca\_548556/1-165 163 Y Y Y 165

Conservation

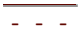

Quality

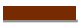

Consensus

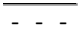

## Ortholog 12

|                               |   |   |   |   |   |   |   |   |   |   |   |   |   |   |   |   |   |   |   |   |   |   |   |   |   |   |   |   |   |   |   |   |   |   |   |   |   |   |   |   |   |   |   |   |    |    |
|-------------------------------|---|---|---|---|---|---|---|---|---|---|---|---|---|---|---|---|---|---|---|---|---|---|---|---|---|---|---|---|---|---|---|---|---|---|---|---|---|---|---|---|---|---|---|---|----|----|
| <i>Pso_286162/1-140</i>       | 1 | M | R | L | T | Y | F | L | T | V | I | V | A | T | L | H | A | G | G | T | A | L | A | T | A | E | A | P | N | H | A | A | I | V | N | V | A | S | A | D | N | V | H | S | 44 |    |
| <i>Prm_Prm_76324/1-112</i>    | 1 | M | R | L | T | Y | I | L | A | V | V | I | A | A | T | L | H | A | S | G | N | A | I | S | T | T | K | D | S | N | H | V | A | I | P | N | V | A | S | S | D | I | A | R | S  | 44 |
| <i>Pso_286793/1-130</i>       | 1 | M | R | L | T | Y | I | F | A | V | V | I | A | A | T | L | Q | A | S | G | T | A | L | I | T | T | R | T | L | N | H | A | A | I | S | N | V | A | S | A | D | I | V | H | S  | 44 |
| <i>Pca_20942/1-104</i>        | 1 | M | R | L | T | Y | I | L | A | L | V | I | A | A | T | L | H | A | S | G | T | A | I | S | T | D | K | S | V | K | I | P | A | I | A | - | - | - | - | - | - | - | - | - | 34 |    |
| <i>Pso_286791/1-119</i>       | 1 | M | R | L | T | Y | I | L | A | V | V | V | A | A | T | L | H | A | S | G | T | A | L | P | T | T | K | D | S | N | Q | A | A | I | S | N | V | A | S | A | G | I | V | P | T  | 44 |
| <i>Pin_PITG_18986T0/1-118</i> | 1 | M | R | L | I | F | I | L | S | V | I | V | A | A | T | F | H | V | S | N | A | A | L | - | T | T | K | D | S | N | Q | A | T | I | A | N | V | P | S | A | G | I | S | G | V  | 43 |

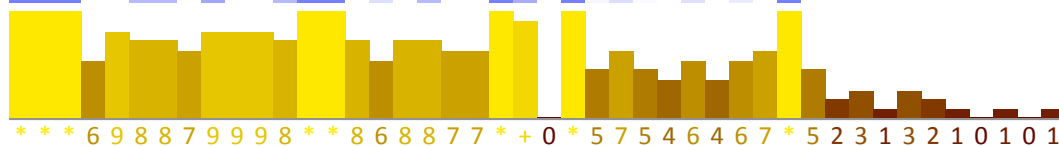

| Age Group | Percentage (%) |
|-----------|----------------|
| 18-24     | 95             |
| 25-34     | 90             |
| 35-44     | 88             |
| 45-54     | 92             |
| 55-64     | 95             |
| 65-74     | 85             |
| 75+       | 75             |

MRLTYILAVV+AATLHASGTALSTTKDSNHAAI+NVASADIVHS

|                               |    |                 |         |                             |                                     |    |
|-------------------------------|----|-----------------|---------|-----------------------------|-------------------------------------|----|
| <i>Pso_286162/1-140</i>       | 45 | L D T T A E I G | G R M L | R K V K E D T V S K - K D H | E E R G - - - P G A I L E R Q T A   | 83 |
| <i>Prm_Prm_76324/1-112</i>    | 45 | - - - L E D N T | G R H L | R R V - - - - - - D N       | E E R T F K E F G G A L K K F L E K | 76 |
| <i>Pso_286793/1-130</i>       | 45 | I D A I E G N G | G R M L | R K A K E D P A F E - E D N | E E R A - - - G G A F T K - - -     | 79 |
| <i>Pca_20942/1-104</i>        | 35 | - - - - A D D A | G R M L | R I V K E K P V - - - S D K | E A E R E E R F A N - - - - - -     | 63 |
| <i>Pso_286791/1-119</i>       | 45 | - - - - E E N G | G R M L | - - - - - - - V E - E V K   | E E R A - - - G G A L V K - - -     | 67 |
| <i>Pin_PITG_18986T0/1-118</i> | 44 | - - - P E A N N | G R L L | R R V E K D S A F D N E T D | E E R I F Q R L G A - - - - - -     | 76 |

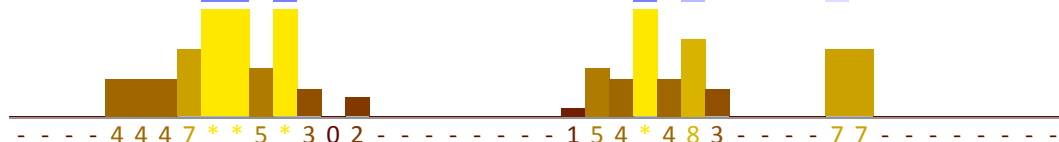

| Year | 15-19 | 20-24 | 25-29 | 30-34 | 35-39 | 40-44 | 45-49 | 50-54 | 55-59 | 60-64 | 65-69 | 70-74 | 75-79 | 80-84 | 85+ |
|------|-------|-------|-------|-------|-------|-------|-------|-------|-------|-------|-------|-------|-------|-------|-----|
| 1990 | 10    | 12    | 15    | 18    | 20    | 22    | 25    | 28    | 30    | 32    | 35    | 38    | 40    | 42    | 45  |
| 2000 | 10    | 12    | 15    | 18    | 20    | 22    | 25    | 28    | 30    | 32    | 35    | 38    | 40    | 42    | 45  |
| 2010 | 10    | 12    | 15    | 18    | 20    | 22    | 25    | 28    | 30    | 32    | 35    | 38    | 40    | 42    | 45  |
| 2015 | 15    | 18    | 20    | 22    | 25    | 28    | 30    | 32    | 35    | 38    | 40    | 42    | 45    | 48    | 50  |

|                               |    |   |   |   |   |   |   |   |   |   |   |   |   |   |   |   |   |   |   |   |   |   |   |   |   |   |   |   |   |   |   |   |   |   |   |   |   |   |   |   |   |   |   |     |     |
|-------------------------------|----|---|---|---|---|---|---|---|---|---|---|---|---|---|---|---|---|---|---|---|---|---|---|---|---|---|---|---|---|---|---|---|---|---|---|---|---|---|---|---|---|---|---|-----|-----|
| <i>Pso_286162/1-140</i>       | 84 | - | - | - | - | - | - | F | V | K | K | L | F | S | R | Q | N | A | I | V | N | R | A | Q | G | A | F | Q | R | Q | N | A | F | V | N | R | D | Q | G | A | F | Q | R | Q   | 120 |
| <i>Prm_Prm_76324/1-112</i>    | 77 | R | T | P | F | T | D | A | W | K | Q | R | R | A | D | K | F | K | L | K | A | K | K | R | Y | D | - | - | R | M | Q | S | N | I | L | Y | A | S | - | - | - | - | - | 111 |     |
| <i>Pso_286793/1-130</i>       | 80 | - | - | - | - | - | - | W | L | K | H | K | L | E | Y | L | K | V | S | A | K | K | R | I | P | - | - | R | T | Y | E | N | E | L | H | R | N | F | R | N | A | D | F | N   | 114 |
| <i>Pca_20942/1-104</i>        | 64 | - | - | - | - | - | - | P | I | K | K | L | G | A | F | L | K | - | - | - | K | K | W | D | K | - | - | Q | T | L | K | E | A | I | K | R | D | E | N | - | - | - | - | 90  |     |
| <i>Pso_286791/1-119</i>       | 68 | - | - | - | - | - | - | W | L | K | Q | Q | G | E | N | L | K | F | H | I | K | K | Y | M | P | - | - | G | T | H | E | N | K | L | Y | T | D | V | Q | Q | G | K | R | N   | 102 |
| <i>Pin_PITG_18986T0/1-118</i> | 77 | - | - | - | - | - | - | Y | L | K | K | I | P | S | K | M | K | K | S | W | K | E | S | T | N | - | - | E | R | M | M | H | W | L | E | E | D | T | R | V | C | W | T | R   | 111 |

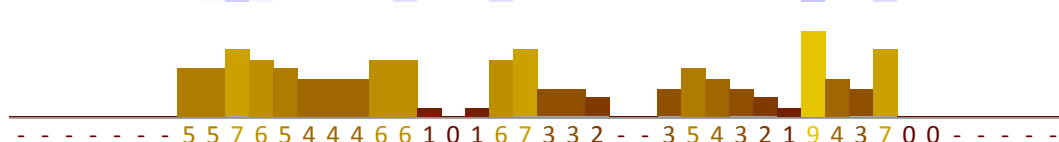

| Year | Number of Publications |
|------|------------------------|
| 1970 | 1                      |
| 1971 | 1                      |
| 1972 | 1                      |
| 1973 | 1                      |
| 1974 | 1                      |
| 1975 | 1                      |
| 1976 | 1                      |
| 1977 | 1                      |
| 1978 | 1                      |
| 1979 | 1                      |
| 1980 | 2                      |
| 1981 | 5                      |
| 1982 | 7                      |
| 1983 | 6                      |
| 1984 | 3                      |
| 1985 | 1                      |
| 1986 | 5                      |
| 1987 | 1                      |
| 1988 | 1                      |
| 1989 | 6                      |
| 1990 | 1                      |
| 1991 | 1                      |
| 1992 | 1                      |
| 1993 | 7                      |
| 1994 | 7                      |
| 1995 | 1                      |
| 1996 | 1                      |
| 1997 | 1                      |
| 1998 | 4                      |
| 1999 | 1                      |
| 2000 | 1                      |
| 2001 | 1                      |
| 2002 | 1                      |
| 2003 | 1                      |
| 2004 | 1                      |
| 2005 | 1                      |
| 2006 | 1                      |
| 2007 | 1                      |
| 2008 | 1                      |
| 2009 | 1                      |
| 2010 | 1                      |
| 2011 | 1                      |
| 2012 | 1                      |
| 2013 | 1                      |
| 2014 | 1                      |
| 2015 | 1                      |
| 2016 | 1                      |
| 2017 | 1                      |
| 2018 | 1                      |
| 2019 | 1                      |
| 2020 | 1                      |

- - - - - W L K K L G + K L K - S A K K R - P - - + T O E N - L Y R D - R - - R N

*Pso\_286162*/1-140      121 N A F V K R A I Q R Q N H F K L S D N A      140  
*Dms\_Dms\_76224*/1-112      T      112

## Conservation

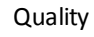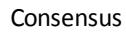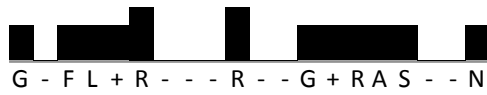

Ortholog 13

|                               |   |   |   |   |   |   |   |   |   |   |   |   |   |   |   |   |   |   |   |   |   |   |   |   |   |   |   |   |   |   |   |   |   |   |   |   |   |   |   |   |   |   |   |   |    |    |    |
|-------------------------------|---|---|---|---|---|---|---|---|---|---|---|---|---|---|---|---|---|---|---|---|---|---|---|---|---|---|---|---|---|---|---|---|---|---|---|---|---|---|---|---|---|---|---|---|----|----|----|
| <i>Prm_Prm_78009/1-488</i>    | 1 | M | R | L | T | C | V | I | - | L | L | A | V | A | V | L | L | E | N | S | D | A | A | S | T | P | T | E | A | N | M | A | T | P | D | T | Q | A | P | T | R | S | L | I | D  | 43 |    |
| <i>Pso_286221/1-593</i>       | 1 | M | L | R | H | G | V | L | - | L | Q | I | I | T | A | L | L | A | Q | A | D | V | S | S | A | T | P | A | S | L | L | T | T | T | D | I | Q | R | L | V | H | S | T | V | V  | 43 |    |
| <i>Pca_119793/1-485</i>       | 1 | M | Q | Y | Q | W | L | V | - | V | L | A | F | I | V | L | L | S | T | T | N | A | I | S | P | P | - | - | - | - | - | - | - | - | - | - | D | L | L | T | A | N | T | L | R  | T  | 34 |
| <i>Pin_PITG_15032T0/1-485</i> | 1 | M | R | C | H | W | V | L | Y | V | L | L | V | A | I | T | F | A | D | H | A | D | W | S | S | P | K | - | - | - | - | - | - | - | - | T | T | E | I | P | E | R | P | I | T  | 35 |    |
| <i>Pso_286248/1-600</i>       | 1 | M | R | L | H | P | L | T | - | F | I | A | S | A | A | L | V | T | F | T | A | A | E | A | H | Q | - | - | - | - | S | T | T | T | T | Q | L | W | T | S | K | L | - | - | 36 |    |    |
| <i>Pso_286223/1-593</i>       | 1 | M | R | - | - | C | T | V | - | A | W | A | V | A | A | L | L | A | Q | A | D | V | S | S | A | T | P | A | S | L | L | T | T | T | D | I | Q | R | L | V | H | S | T | V | V  | 41 |    |

Conservation

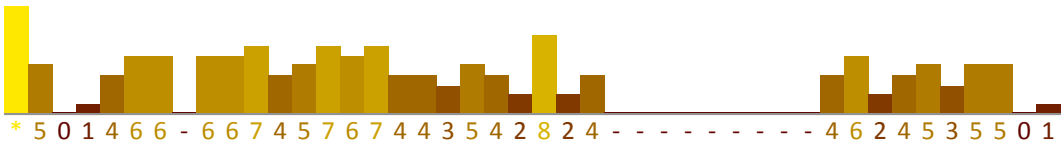

Quality

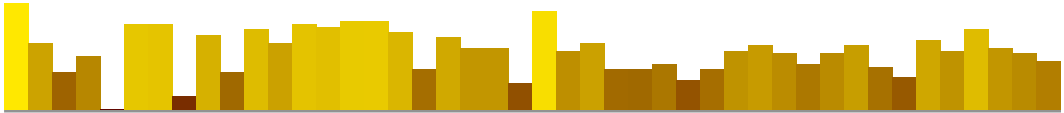

Consensus

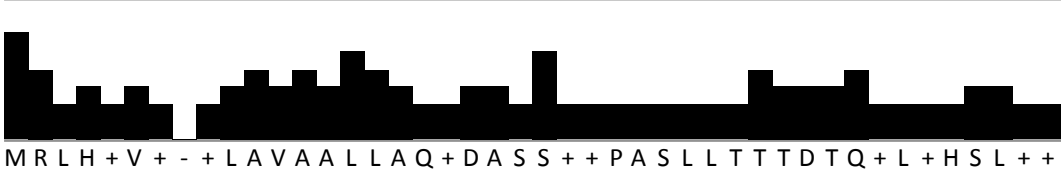

|                               |    |   |   |   |   |   |   |   |   |   |   |   |   |   |   |   |   |   |   |   |   |   |   |   |   |   |   |   |   |   |   |   |   |   |   |   |   |   |   |   |   |   |   |   |    |    |    |
|-------------------------------|----|---|---|---|---|---|---|---|---|---|---|---|---|---|---|---|---|---|---|---|---|---|---|---|---|---|---|---|---|---|---|---|---|---|---|---|---|---|---|---|---|---|---|---|----|----|----|
| <i>Prm_Prm_78009/1-488</i>    | 44 | G | W | Q | D | N | P | T | K | R | R | L | W | I | H | K | A | A | N | N | K | H | D | E | E | R | G | V | S | I | P | K | A | - | - | - | - | - | - | - | - | - | - | - | 75 |    |    |
| <i>Pso_286221/1-593</i>       | 44 | S | Q | R | N | L | P | T | T | R | L | L | R | V | H | - | K | L | S | S | L | D | D | E | E | R | G | L | P | V | S | G | L | E | A | V | A | N | S | V | K | S | T | V | S  | 86 |    |
| <i>Pca_119793/1-485</i>       | 35 | S | I | Q | N | - | - | - | - | - | - | - | - | - | - | Y | R | K | L | S | T | I | Y | N | E | D | R | G | V | A | G | S | T | V | E | S | L | T | N | S | L | K | L | T | -  | -  | 67 |
| <i>Pin_PITG_15032T0/1-485</i> | 36 | P | M | D | S | V | P | - | - | R | L | L | R | L | Y | - | E | S | T | R | A | H | D | E | E | R | G | V | S | A | P | A | A | E | T | V | V | N | S | L | K | S | A | S | -  | 75 |    |
| <i>Pso_286248/1-600</i>       | 37 | - | - | - | D | T | P | I | K | R | L | L | R | A | H | - | - | - | R | T | T | D | D | E | E | R | G | I | T | A | S | G | V | E | T | L | A | N | T | L | K | S | T | T | N  | 74 |    |
| <i>Pso_286223/1-593</i>       | 42 | S | Q | R | N | L | P | T | T | R | L | L | R | V | H | - | K | L | S | S | L | D | D | E | E | R | G | L | P | V | S | G | L | E | A | V | A | N | S | V | K | S | T | V | S  | 84 |    |

Conservation

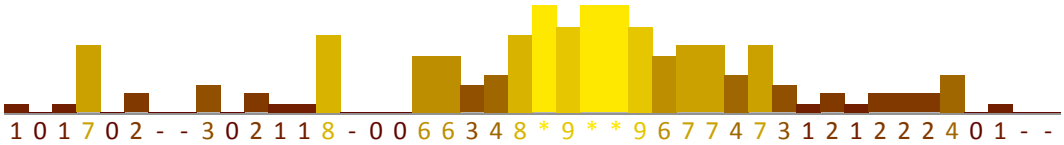

Quality

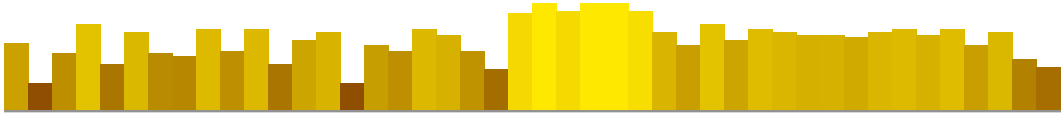

Consensus

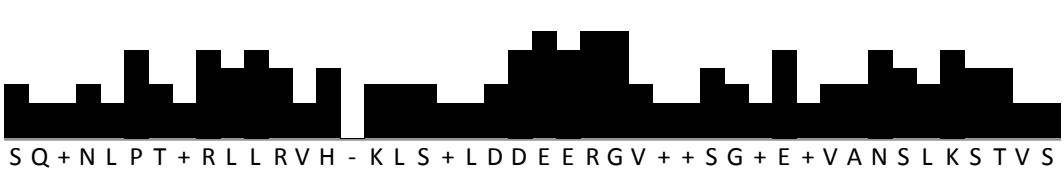

|                               |    |   |   |   |   |   |   |   |   |   |   |   |   |   |   |   |   |   |   |   |   |   |   |   |   |   |   |   |   |   |   |   |   |   |   |   |   |   |   |   |   |   |   |   |   |     |
|-------------------------------|----|---|---|---|---|---|---|---|---|---|---|---|---|---|---|---|---|---|---|---|---|---|---|---|---|---|---|---|---|---|---|---|---|---|---|---|---|---|---|---|---|---|---|---|---|-----|
| <i>Prm_Prm_78009/1-488</i>    | 76 | - | - | D | K | L | D | D | L | L | Q | K | G | T | S | T | D | G | V | F | K | L | L | A | L | D | N | A | A | D | D | I | L | G | S | P | Q | L | N | A | W | I | S | Y | M | 117 |
| <i>Pso_286221/1-593</i>       | 87 | V | - | E | K | L | R | E | W | L | K | R | G | E | S | T | D | D | V | F | K | L | L | T | L | D | K | A | A | D | D | L | L | A | N | L | N | L | N | A | W | I | N | Y | I | 129 |
| <i>Pca_119793/1-485</i>       | 68 | - | - | D | E | L | D | D | L | L | N | A | G | K | S | A | D | D | V | F | K | L | L | S | L | D | K | - | A | D | D | L | L | G | N | S | K | L | H | E | W | I | A | Y | M | 108 |
| <i>Pin_PITG_15032T0/1-485</i> | 76 | - | - | T | Q | L | D | E | W | L | A | K | G | K | P | T | D | D | V | F | K | L | L | T | L | D | V | A | A | D | D | L | L | A | N | S | K | L | T | E | W | I | T | Y | M | 117 |
| <i>Pso_286248/1-600</i>       | 75 | I | D | D | E | L | K | A | L | V | A | K | G | E | S | A | D | D | A | F | K | L | L | T | L | D | K | A | A | D | D | L | L | S | N | P | K | L | Q | S | W | I | S | H | L | 118 |
| <i>Pso_286223/1-593</i>       | 85 | V | - | E | K | L | R | E | W | L | K | R | G | E | S | T | D | D | V | F | K | L | L | T | L | D | K | A | A | D | D | L | L | A | N | L | N | L | N | A | W | I | N | Y | I | 127 |

Conservation

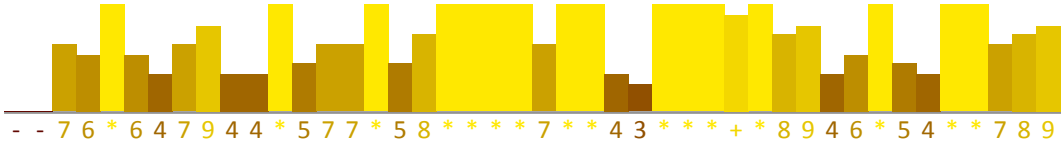

Quality

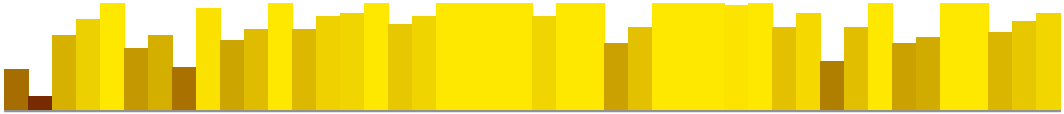

Consensus

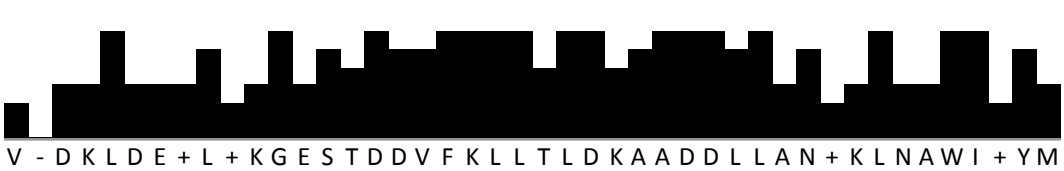

|                            |     |   |   |   |   |   |   |   |   |   |   |   |   |   |   |   |   |   |   |   |   |   |   |   |   |   |   |   |   |   |   |   |   |   |   |   |   |   |   |   |   |   |   |   |   |     |
|----------------------------|-----|---|---|---|---|---|---|---|---|---|---|---|---|---|---|---|---|---|---|---|---|---|---|---|---|---|---|---|---|---|---|---|---|---|---|---|---|---|---|---|---|---|---|---|---|-----|
| <i>Prm_Prm_78009/1-488</i> | 118 | K | R | F | N | S | K | N | P | T | N | K | A | S | L | I | A | T | L | T | A | H | Y | G | D | E | A | L | A | K | M | I | E | A | A | K | K | V | P | T | T | A | G | F | A | 161 |
| <i>Pso_286221/1-593</i>    | 120 | K | L | E | N | F | E | N | D | T | R | K | V | G | L | I | A | T | L | T | A | K | Y | G | D | E | A | L | A | K | M | I | E | A | A | K | K | V | P | T | T | A | G | F | A | 173 |

|                                                  |     |   |   |   |   |   |   |   |   |   |   |   |   |   |   |   |   |   |   |   |   |   |   |   |   |   |   |   |   |   |   |   |   |   |   |   |   |   |   |   |   |   |   |   |     |     |
|--------------------------------------------------|-----|---|---|---|---|---|---|---|---|---|---|---|---|---|---|---|---|---|---|---|---|---|---|---|---|---|---|---|---|---|---|---|---|---|---|---|---|---|---|---|---|---|---|---|-----|-----|
| <i>P<sub>rm</sub>_P<sub>rm</sub>_78009/1-488</i> | 179 | - | - | - | - | - | - | - | - | - | - | - | - | - | - | - | - | - | - | - | - | - | P | D | K | V | F | A | L | L | K | L | D | E | A | G | A | G | L | F | A | Q | P | Q | 200 |     |
| <i>P<sub>so</sub>_286221/1-593</i>               | 261 | T | M | A | K | R | L | E | N | E | Q | I | R | R | W | I | A | D | E | M | - | - | Y | P | I | D | V | F | T | L | L | K | L | D | K | S | G | A | Q | L | F | T | Q | P | Q   | 302 |
| <i>P<sub>ca</sub>_119793/1-485</i>               | 170 | - | - | - | - | - | - | - | - | - | - | - | - | - | - | - | - | - | - | - | - | - | P | T | Q | V | F | Q | L | L | K | L | D | E | A | G | T | D | L | F | T | Q | P | Q | 191 |     |
| <i>P<sub>in</sub>_PITG_15032T0/1-485</i>         | 179 | - | - | - | - | - | - | - | - | - | - | - | - | - | - | - | - | - | - | - | - | - | P | D | D | V | F | T | L | L | K | L | D | K | A | G | Q | K | V | F | T | H | P | E | 200 |     |



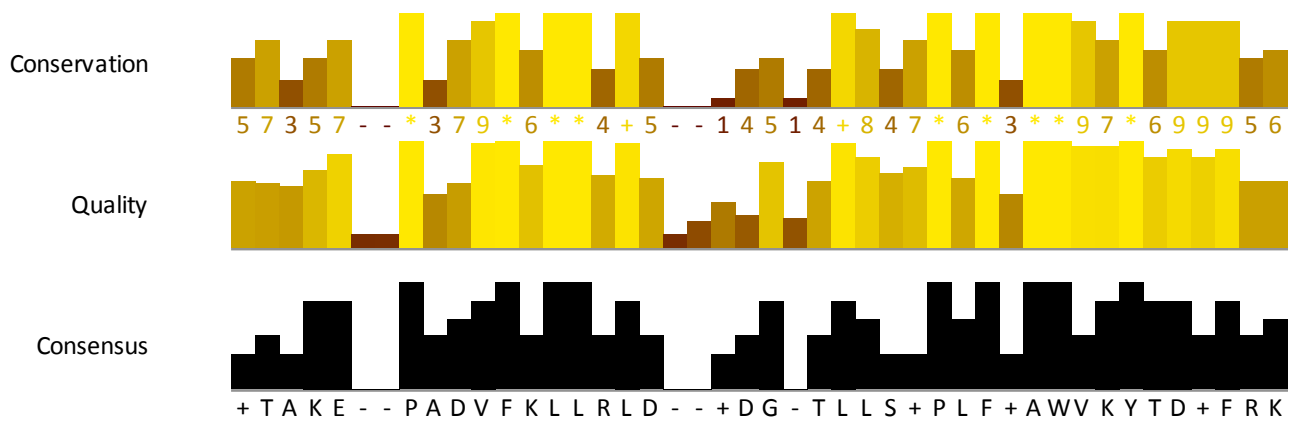

*Prm\_Prm\_78009/1-488* 307 I H Y G T K L T T I A T L R K Y Y D D Y N L A K V L V D G M A S T Y P Q T A S L A T R L 350

*Pso\_286221/1-593* 412 K Y F G T R K T A I P A L L K L Y K A D D L A K M I L - - A G S K N P T T A R L A K R M 453

*Pca\_119793/1-485* 296 F H F G T K L T T I S V L S K F Y Q D D V L T K M I L - - A A S K H S S T S E I A R R L 337

*Pin\_PITG\_15032T0/1-485* 305 I Y Y G T E L T T I A T L T A K Y G D E T L T K M I L - - Q A L S S P S T A N I A K R L 346

*Pso\_286248/1-600* 418 R F P R Y E D S A I S T L L D K F S S V S L L E M I Q - - A A S K N P K T E A I A K R L 459

*Pso\_286223/1-593* 411 I Y F G S E H T I I S S M E A F F D T K I V A T M I A - - T A S K K T S T A S I A K R L 452

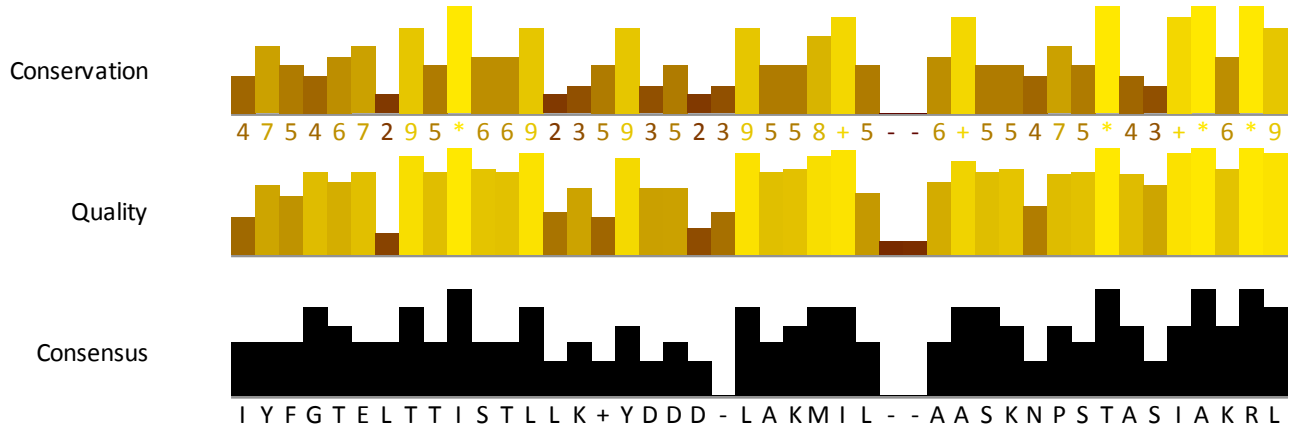

*Prm\_Prm\_78009/1-488* 351 E T E L L R E W Y M A V K - P P M Y V F K M L N L Q T T G L K L F A N P L Y T I W T N Y 393

*Pso\_286221/1-593* 454 Y D E L L R S W S V E K L - A P E L V F A S L N L H L T G N K L L E S P L F T V W L K Y 496

*Pca\_119793/1-485* 338 Y K E Q Q R N W Y L G K F P A P E H V F K L R L D Q G D I P L L E R P L F G I W T K Y 381

*Pin\_PITG\_15032T0/1-485* 347 E T E Q L R N W Y I H K Y - S P Q H V F T T L N L Y S E G V N A F D R P L F H V W S K Y 389

*Pso\_286248/1-600* 460 D T E I V E K W F Q N G N - T P G S V Y N L L R L N N D G D K V L E S P F L P S W L K F 502

*Pso\_286223/1-593* 453 E T E L L R D W S K A L Q - T P G Q V F T K L E L - T V D Y K L F E R T L F P L W S K Y 494

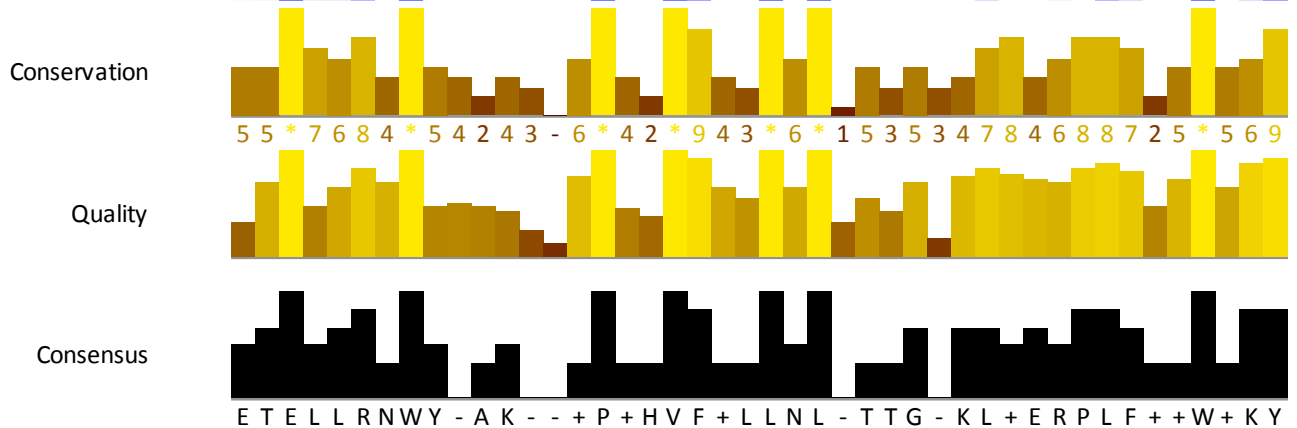

*Prm\_Prm\_78009/1-488* 394 I A F F N K V D - P E F K V N L L T M L T K E L G E K K L S R V L I A A E K V P S T K D 436

*Pso\_286221/1-593* 497 L I A Y S D K N - P T V N V S L L S Q L E N N Y K G D R L S K L L I A A E D V P S T K R 539

*Pca\_119793/1-485* 382 M V Y Y S D L R - P K E D V S L L T V L N K V Y K E R D L S Q I L V E A Y H V P R T K D 424

*Pin\_PITG\_15032T0/1-485* 390 A T Y F G A A E - P K Y K P S F L T N L L D V Y G E K N L V K V I R A G S K N P N T K K 432

*Pso\_286248/1-600* 503 T E Y F N S K Q I P K D Q V S A I S V L R N E F K D E I L A K M L I E A H K K E S T K K 546

*Pso\_286223/1-593* 495 V A Y F S E V E - P S F K V T L L N Q L T K I Y G E R D L C K V L V R A E K V P K T H D 537

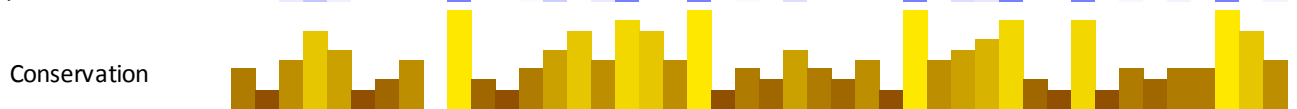

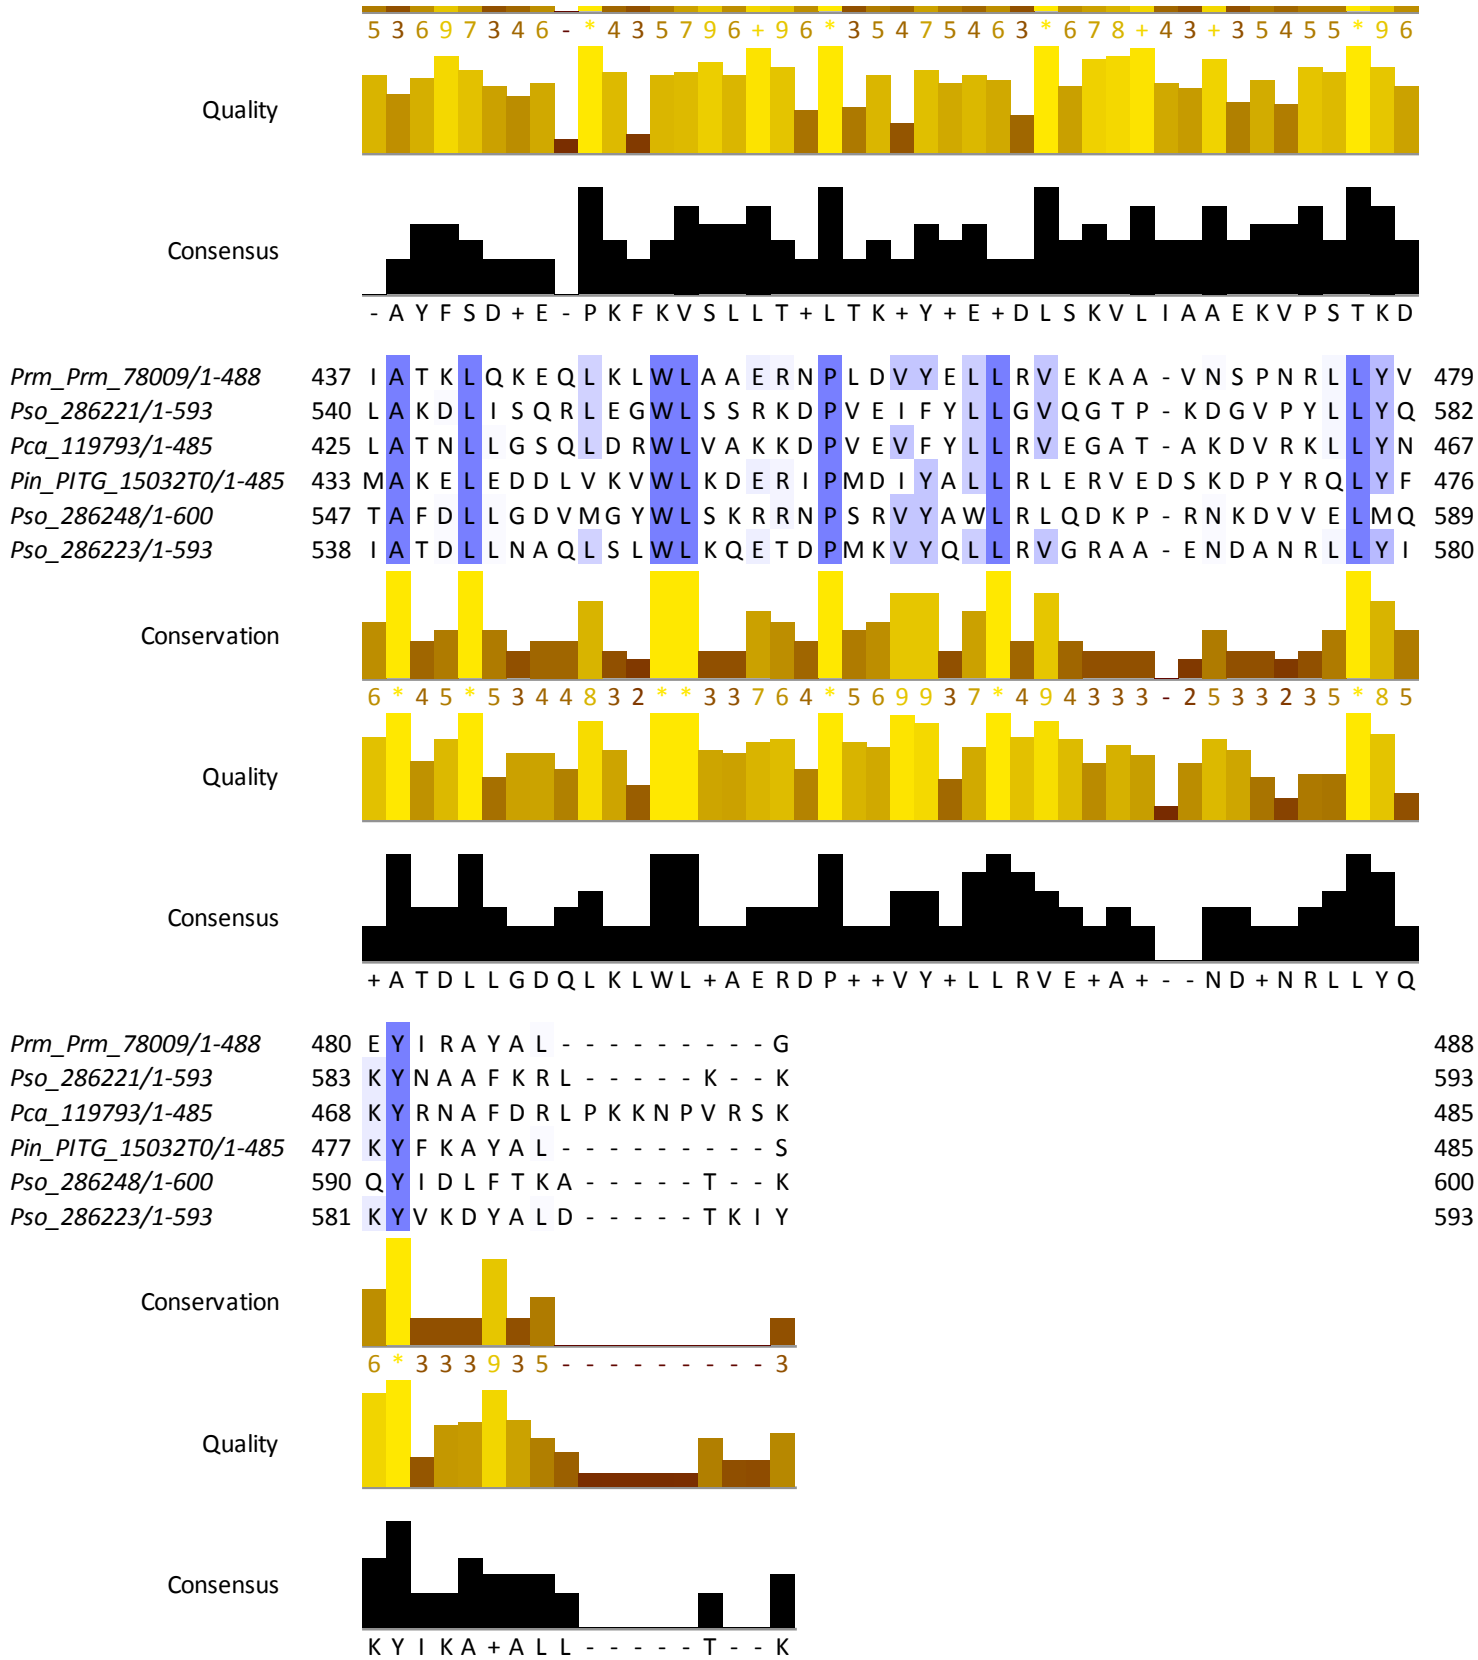



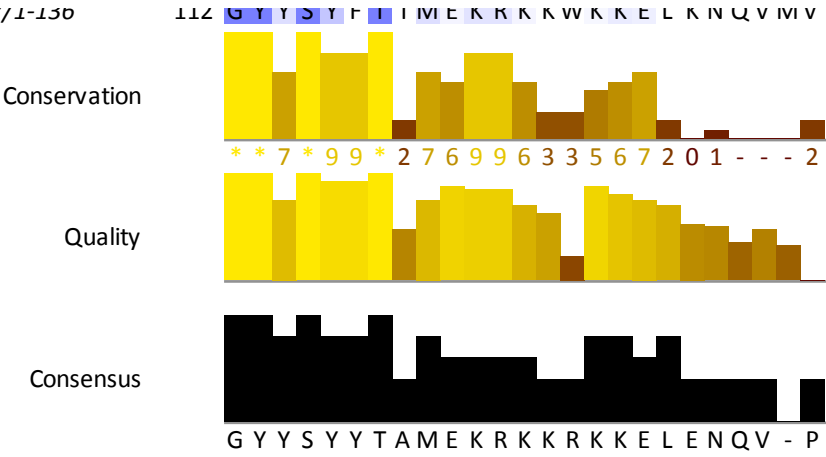

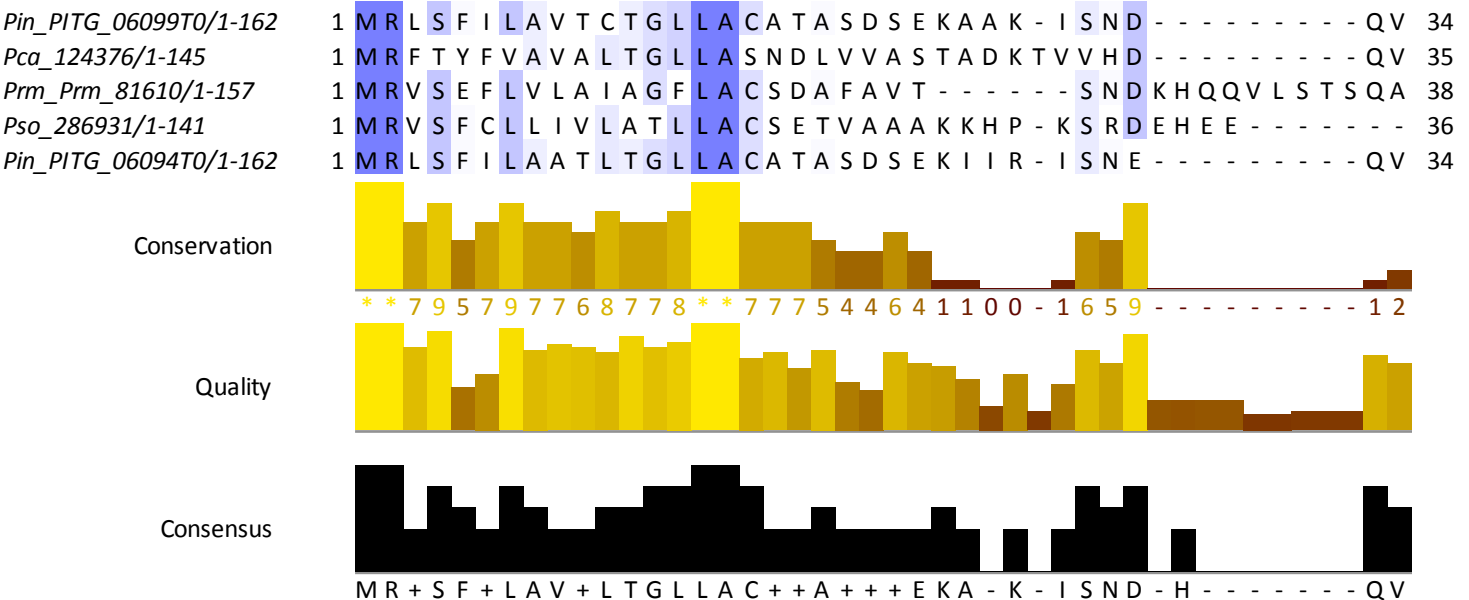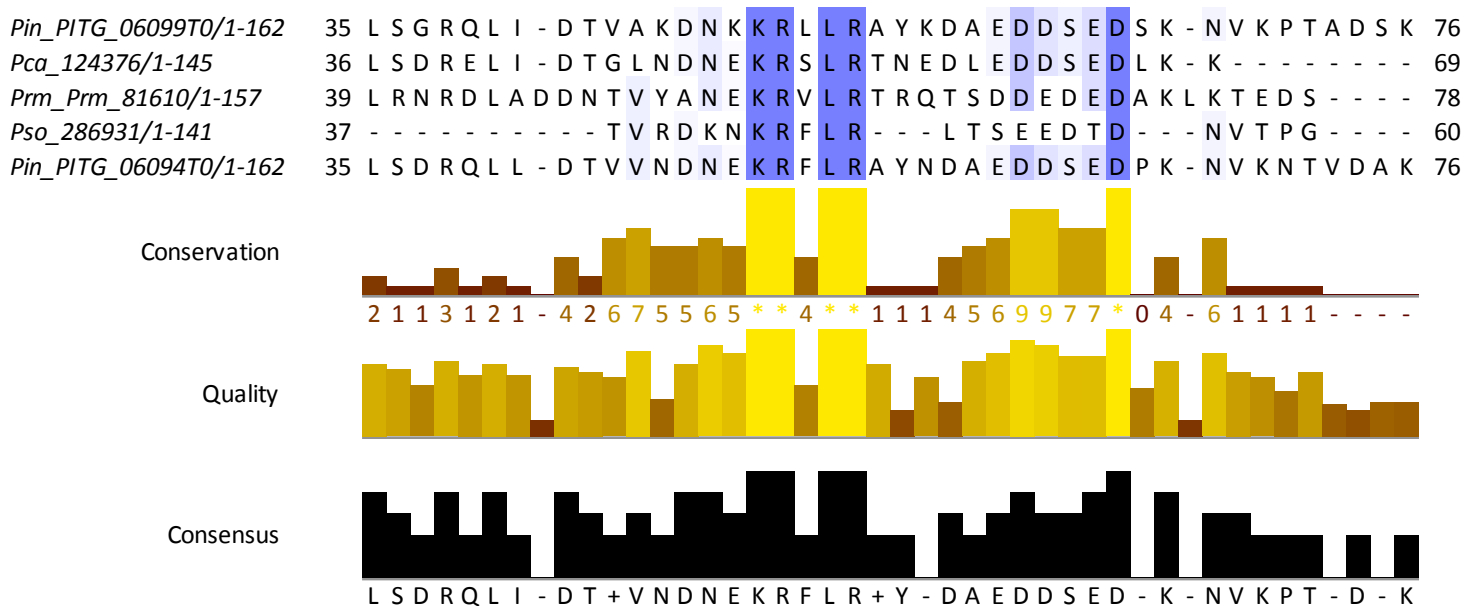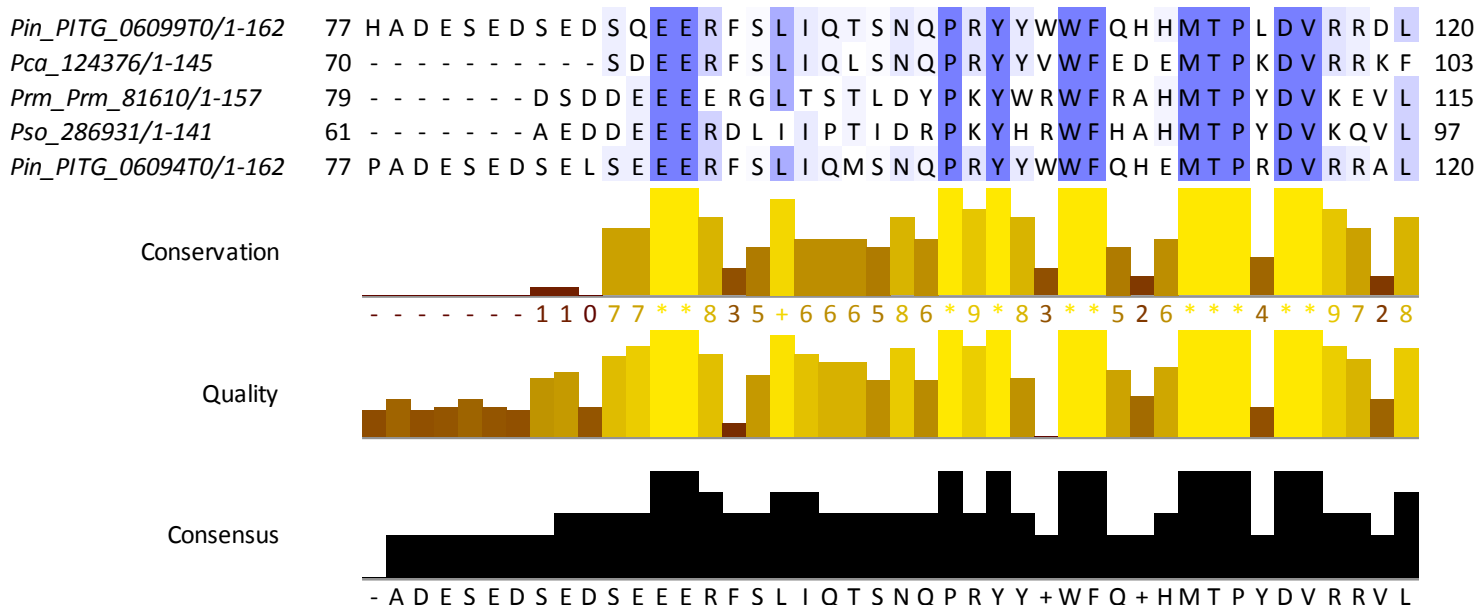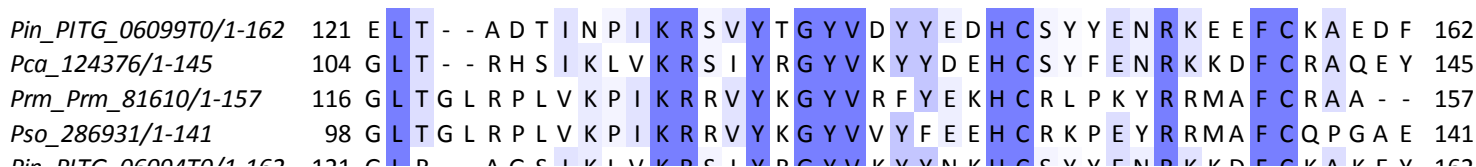

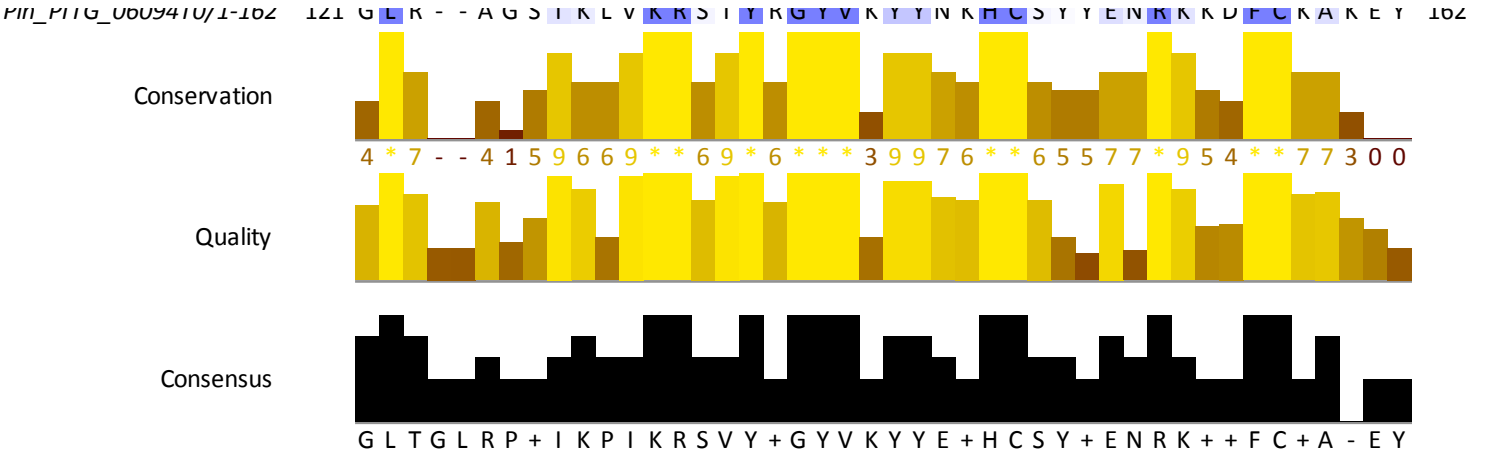

Pin\_PITG\_06099T0/1-162  
Pca\_124376/1-145  
Prm\_Prm\_81610/1-157  
Pso\_286931/1-141  
Pin\_PITG\_06094T0/1-162

Conservation

Quality

Consensus

Ortholog 16

|                               |   |   |   |   |   |   |   |   |   |   |   |   |   |   |   |   |   |   |   |   |   |   |   |   |   |   |   |   |   |   |   |   |   |   |   |   |   |   |   |   |   |   |   |   |    |    |
|-------------------------------|---|---|---|---|---|---|---|---|---|---|---|---|---|---|---|---|---|---|---|---|---|---|---|---|---|---|---|---|---|---|---|---|---|---|---|---|---|---|---|---|---|---|---|---|----|----|
| <i>Prm_Prm_81911/1-162</i>    | 1 | M | R | L | L | L | W | V | L | L | A | T | L | V | I | Y | I | S | T | T | N | A | A | S | A | V | T | D | S | E | D | T | K | L | S | Q | L | T | S | E | D | I | E | A | L  | 44 |
| <i>Pin_PITG_18405T0/1-159</i> | 1 | M | R | F | L | V | W | V | F | F | V | G | L | V | T | F | V | S | G | T | H | A | I | S | K | L | A | N | S | N | E | P | Q | S | T | Q | L | T | M | K | D | I | D | T | L  | 44 |
| <i>Pca_116645/1-157</i>       | 1 | M | R | L | L | L | W | A | L | L | V | T | L | V | A | F | V | S | S | I | N | A | E | F | - | - | - | T | A | D | S | K | V | T | Q | D | S | K | E | E | I | N | A | L | 40 |    |
| <i>Pso_284377/1-157</i>       | 1 | M | R | L | L | L | W | V | L | L | V | T | L | V | T | F | I | S | S | A | S | A | T | A | T | V | T | D | S | K | D | I | T | V | S | Q | L | T | D | S | E | I | D | E | L  | 44 |
| <i>Pin_PITG_10640T0/1-159</i> | 1 | M | R | F | L | V | W | V | F | F | V | G | L | V | T | F | V | S | G | T | H | A | I | S | K | L | A | N | S | N | E | P | Q | S | T | Q | L | T | M | K | D | I | D | T | L  | 44 |

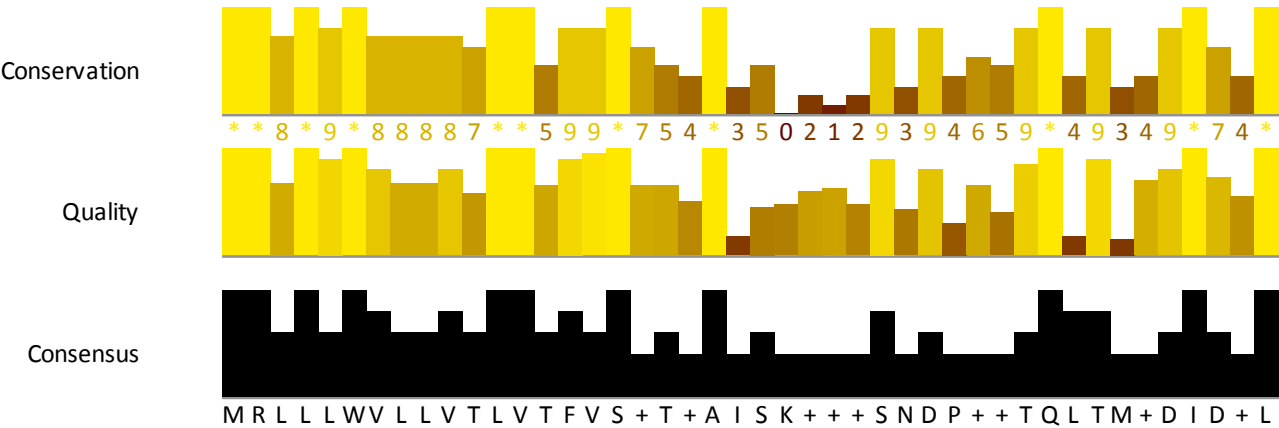

|                               |    |   |   |   |   |   |   |   |   |   |   |   |   |   |   |   |   |   |   |   |   |   |   |   |   |   |   |   |   |   |   |   |   |   |   |   |   |   |   |   |   |   |   |   |    |    |
|-------------------------------|----|---|---|---|---|---|---|---|---|---|---|---|---|---|---|---|---|---|---|---|---|---|---|---|---|---|---|---|---|---|---|---|---|---|---|---|---|---|---|---|---|---|---|---|----|----|
| <i>Prm_Prm_81911/1-162</i>    | 45 | T | H | L | L | A | V | E | S | - | D | V | D | A | K | R | F | L | R | G | D | T | E | T | D | L | T | T | A | G | S | D | T | D | A | L | D | A | E | A | E | E | R | G | I  | 87 |
| <i>Pin_PITG_18405T0/1-159</i> | 45 | T | R | L | L | F | V | E | D | - | G | D | A | A | K | R | F | L | R | S | N | A | N | Q | D | L | T | T | A | N | D | D | S | - | - | - | D | V | K | E | E | E | R | G | L  | 84 |
| <i>Pca_116645/1-157</i>       | 41 | T | R | L | L | A | V | D | S | - | S | D | A | A | K | R | F | L | R | G | D | A | - | K | D | L | T | T | A | N | D | D | S | K | E | L | S | A | E | G | E | E | R | G | L  | 82 |
| <i>Pso_284377/1-157</i>       | 45 | S | R | L | L | T | A | E | T | D | D | D | N | T | K | P | F | L | R | G | D | A | K | K | D | L | T | T | A | G | D | K | T | - | - | - | - | E | D | E | E | R | G | L | 83 |    |
| <i>Pin_PITG_10640T0/1-159</i> | 45 | T | R | L | F | F | V | E | D | - | G | D | A | A | K | R | F | L | R | S | N | A | N | Q | D | L | T | T | A | N | D | D | S | - | - | - | D | V | K | E | E | E | R | G | L  | 84 |

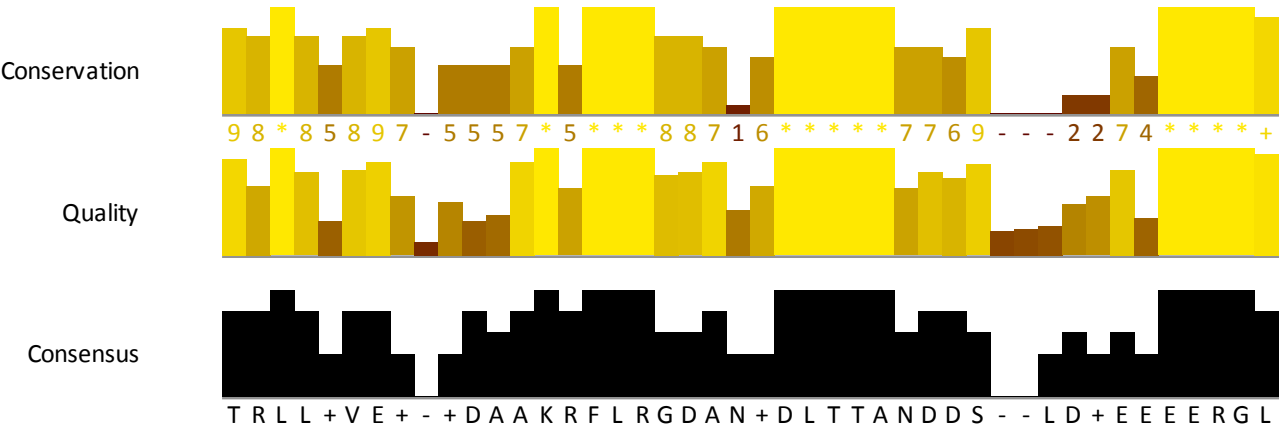

|                               |    |   |   |   |   |   |   |   |   |   |   |   |   |   |   |   |   |   |   |   |   |   |   |   |   |   |   |   |   |   |   |   |   |   |   |   |   |   |   |   |   |   |   |   |    |    |
|-------------------------------|----|---|---|---|---|---|---|---|---|---|---|---|---|---|---|---|---|---|---|---|---|---|---|---|---|---|---|---|---|---|---|---|---|---|---|---|---|---|---|---|---|---|---|---|----|----|
| <i>Prm_Prm_81911/1-162</i>    | 88 | V | P | S | S | V | T | N | L | I | N | K | V | K | N | G | W | S | K | F | K | T | K | A | L | E | K | A | F | K | H | M | M | K | N | G | E | D | P | T | K | L | A | K | R  | 13 |
| <i>Pin_PITG_18405T0/1-159</i> | 85 | L | P | S | K | V | T | N | L | I | S | K | A | K | N | G | W | A | K | W | K | A | N | A | L | E | K | A | F | Q | H | M | M | K | Q | G | E | T | P | T | S | L | A | K | R  | 12 |
| <i>Pca_116645/1-157</i>       | 83 | I | P | S | S | I | T | N | L | V | S | K | V | K | T | G | W | A | N | W | K | A | K | A | L | E | K | A | F | Q | H | M | V | K | N | G | E | N | P | T | T | L | A | K | R  | 12 |
| <i>Pso_284377/1-157</i>       | 84 | F | - | - | - | - | S | L | I | S | S | I | K | N | G | W | A | K | W | K | S | N | A | L | E | K | A | F | Q | H | M | M | K | H | G | E | T | P | T | T | L | A | K | R | 12 |    |
| <i>Pin_PITG_10640T0/1-159</i> | 85 | L | P | S | K | V | T | N | L | I | S | K | A | K | N | G | W | A | K | W | K | A | N | A | L | E | K | A | F | Q | H | M | M | K | Q | G | E | T | P | T | S | L | A | K | R  | 12 |

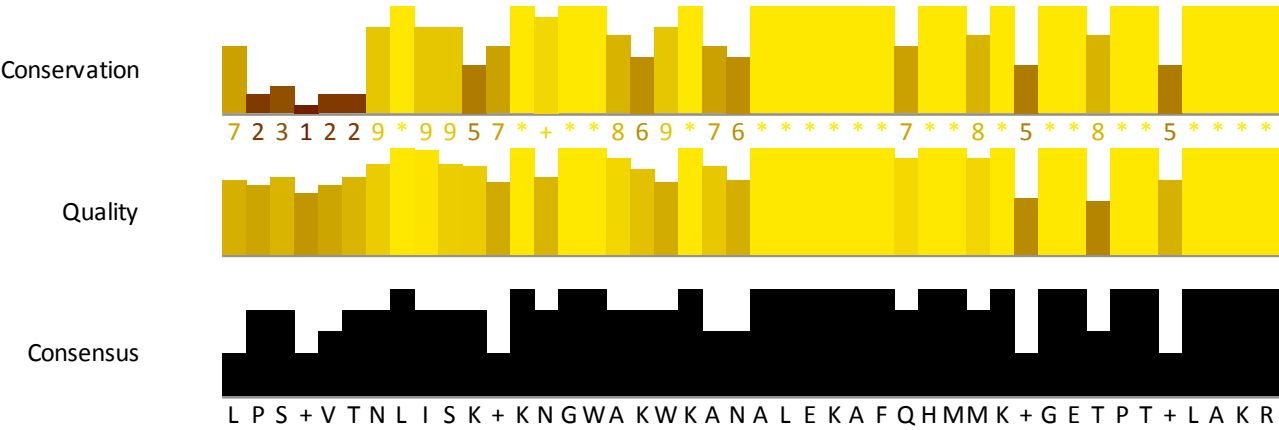

|                               |     |   |   |   |   |   |   |   |   |   |   |   |   |   |   |   |   |   |   |   |   |   |   |   |   |   |   |   |   |   |   |   |   |   |   |   |     |
|-------------------------------|-----|---|---|---|---|---|---|---|---|---|---|---|---|---|---|---|---|---|---|---|---|---|---|---|---|---|---|---|---|---|---|---|---|---|---|---|-----|
| <i>Prm_Prm_81911/1-162</i>    | 132 | L | E | I | G | G | A | A | E | P | R | Y | E | K | L | Y | E | K | Y | T | A | W | W | I | N | Y | H | T | N | A | G | T | - | - | - | - | 162 |
| <i>Pin_PITG_18405T0/1-159</i> | 129 | L | E | I | G | G | A | A | E | L | R | Y | E | K | V | Y | E | K | Y | T | A | W | W | I | N | Y | H | T | V | A | G | T | - | - | - | - | 159 |
| <i>Pca_116645/1-157</i>       | 127 | L | D | I | G | R | T | V | E | G | R | H | H | R | L | Y | E | K | F | T | A | W | W | I | N | Y | H | T | V | A | G | T | - | - | - | - | 157 |
| <i>Pso_284377/1-157</i>       | 123 | L | E | I | G | G | A | T | E | P | R | Y | E | R | L | Y | E | K | L | V | D | Q | L | P | H | D | H | R | Y | L | S | S | G | C | D | Y | 157 |
| <i>Pin_PITG_10640T0/1-159</i> | 128 | L | E | I | G | G | A | A | E | L | R | Y | E | K | V | Y | E | K | Y | T | A | W | W | I | N | Y | H | T | V | A | G | T | - | - | - | - | 159 |

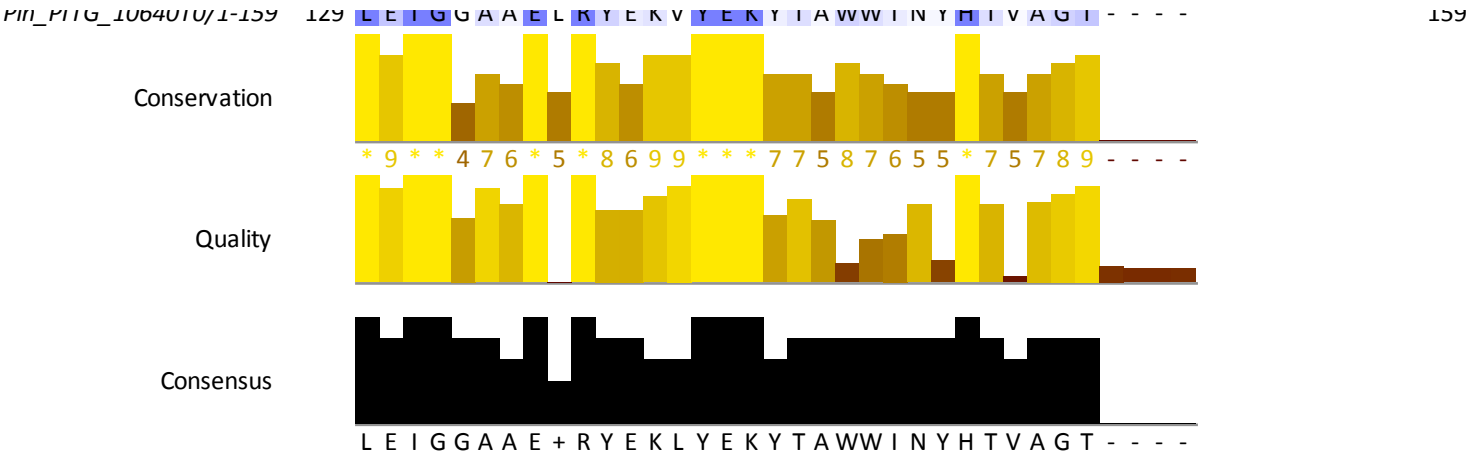

## Ortholog 17

|                               |   |                                                                                       |    |
|-------------------------------|---|---------------------------------------------------------------------------------------|----|
| <i>Pin_PITG_15225T0/1-221</i> | 1 | M R V Y F A L L A - V F A S A L V I - - E S D G K A I T S I Q L - - - - - - - - - -   | 29 |
| <i>Pca_101904/1-270</i>       | 1 | M R F C F V V L A T V F - - - A L L S S E T P A I A T A E K H S E A L S F I N G N N Y | 40 |
| <i>Pin_PITG_15226T0/1-224</i> | 1 | M S V C Y I V P S L V F I V A L S F M T S S C E A K T T V H I Y A - - - - - - - - - - | 33 |
| <i>Pso_285899/1-213</i>       | 1 | M R V G Y V L L A V L A - - - V L V R N C A A T S A T A L S N E A G V S T T H T L N P | 40 |
| <i>Prm_Prm_83274/1-323</i>    | 1 | M R A C L V L L A A A F A N S N V T L A G P V S G P S T A S - - - - - T L V N D F Q P | 38 |

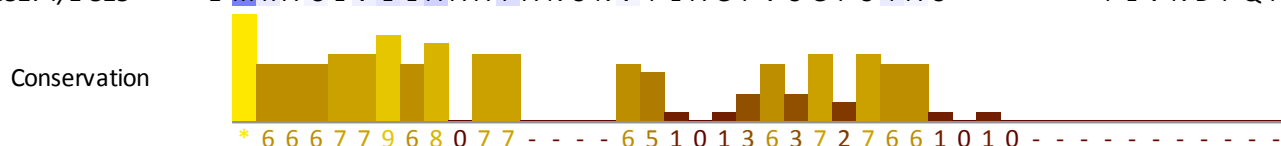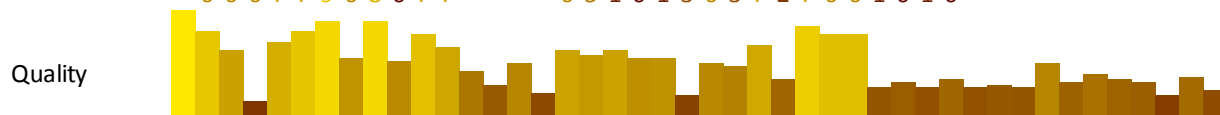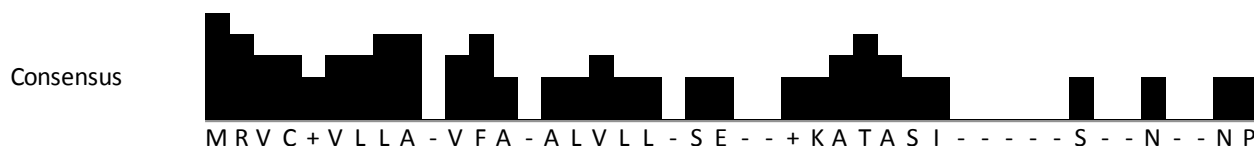

|                               |                                                                                                        |
|-------------------------------|--------------------------------------------------------------------------------------------------------|
| <i>Pin_PITG_15225T0/1-221</i> | 30 - K R T E K <b>R L L R R Y G M G D T D I T E N T K D E E R A</b> - - - - - - - - - - - - - - - - 57 |
| <i>Pca_101904/1-270</i>       | 41 - G G T A N <b>R S L R S H D</b> - - - - - K V N A V E E E R A - - - - - - - - - - - - - - - - 62   |
| <i>Pin_PITG_15226T0/1-224</i> | 34 - G Q I K <b>K R H L R S Y G V G D V D M K D K T S G E E R A</b> - - - - - - - - - - - - - - - - 61 |
| <i>Pso_285899/1-213</i>       | 41 W A E H D K <b>R F P R S H</b> - - - - - - - - - A D H D E K S - - - - - - - - - - - - - - - - 59   |
| <i>Prm_Prm_83274/1-323</i>    | 39 - E G S S K <b>R F L R S Y D M S D L N V N E G A G E E E R G I D L T K L D D V I N V V K G</b> 81   |

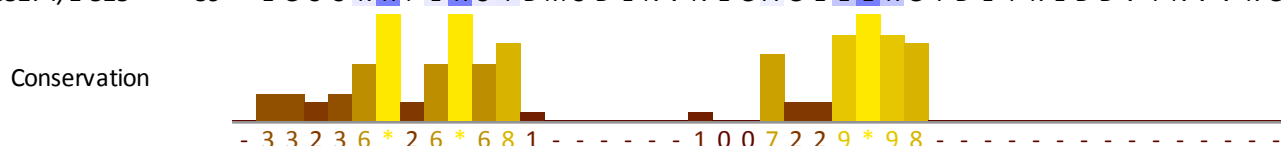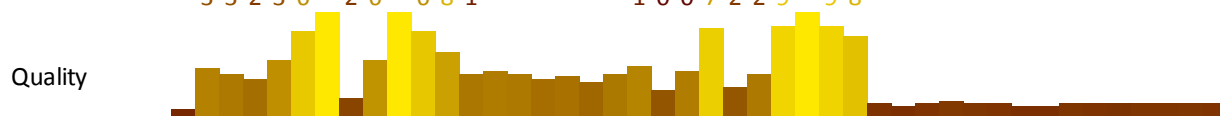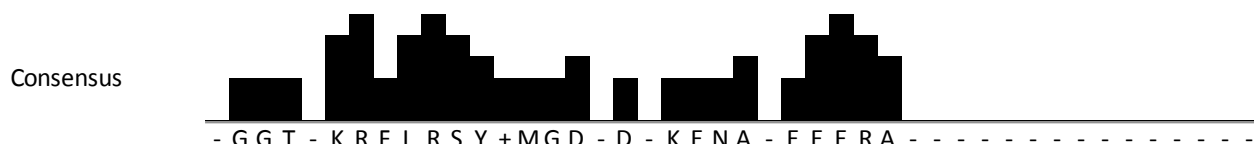[illegible]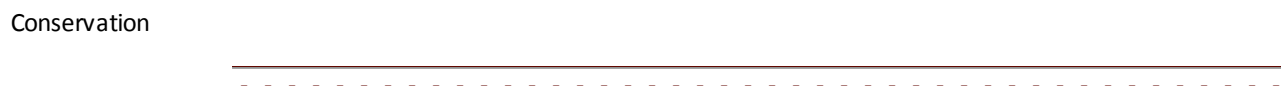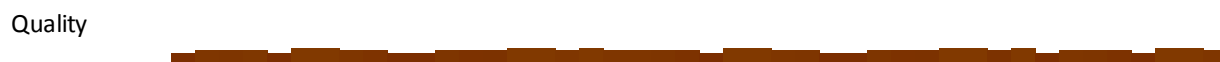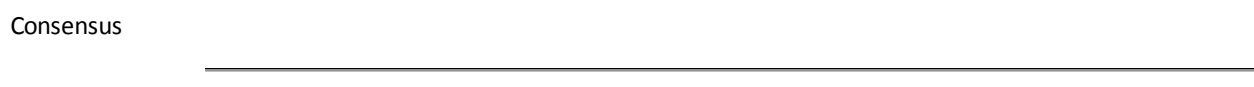

|                               |     |                                                                                         |           |           |                                                 |    |
|-------------------------------|-----|-----------------------------------------------------------------------------------------|-----------|-----------|-------------------------------------------------|----|
| <i>Pin_PITG_15225T0/1-221</i> | 58  | - - - - -                                                                               | - - - - - | - - - - - | G N V S P S F F Q R L N N A D E I V G A L K N Q | 81 |
| <i>Pca_101904/1-270</i>       | 63  | - - - - -                                                                               | - - - - - | - - - - - | I D A D K L V K L L N P D D I A A A L K N Y     | 84 |
| <i>Pin_PITG_15226T0/1-224</i> | 62  | - - - - -                                                                               | - - - - - | - - - - - | G S I D P K T I A D L L Q A D D I V S A L K S H | 85 |
| <i>Pso_285899/1-213</i>       | 60  | - - - - -                                                                               | - - - - - | - - - - - | T L A K I D D L V D P V K L D A A L S G L       | 80 |
| <i>Bsm_Bsm_83274/1-333</i>    | 126 | A N K V L D A A K A D K V L D A A K A D D V L D F A K L D D L L K P D K L A L A L K D D | 160       |           |                                                 |    |

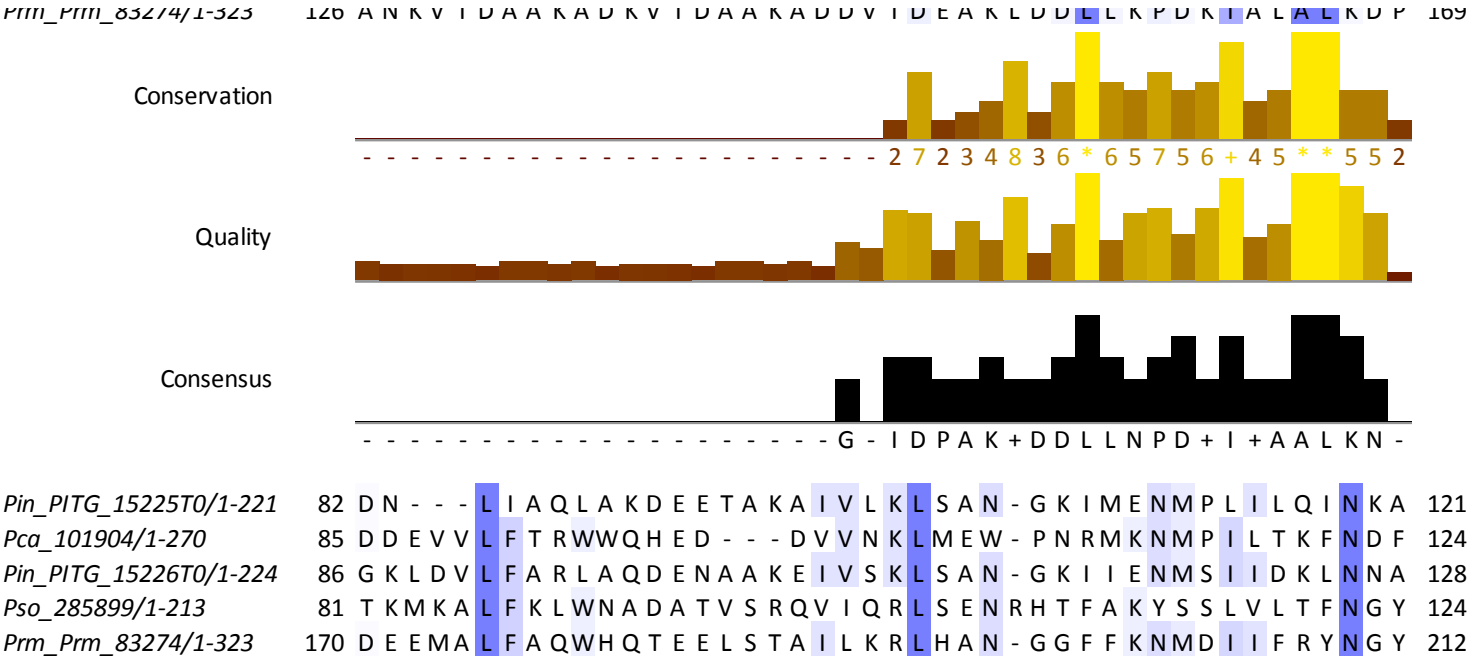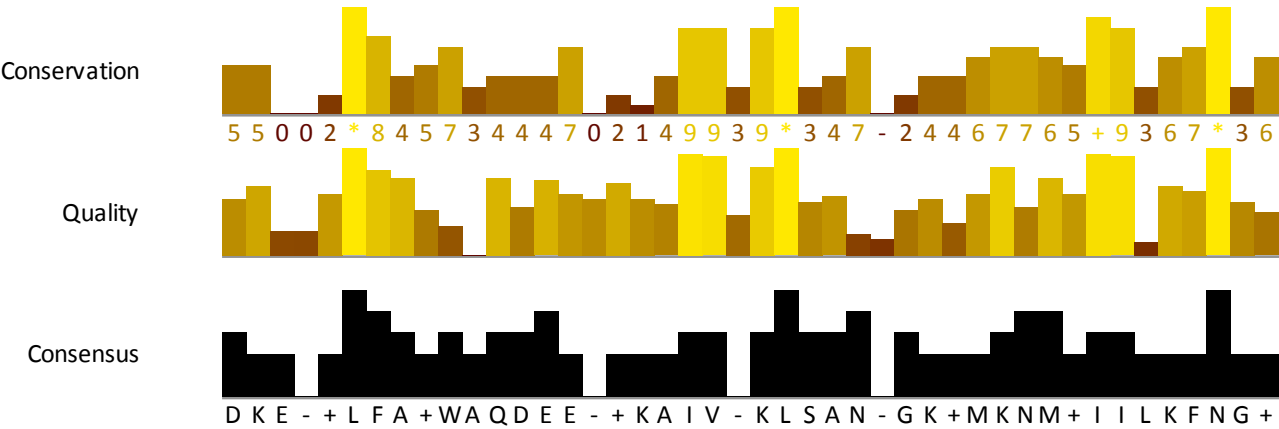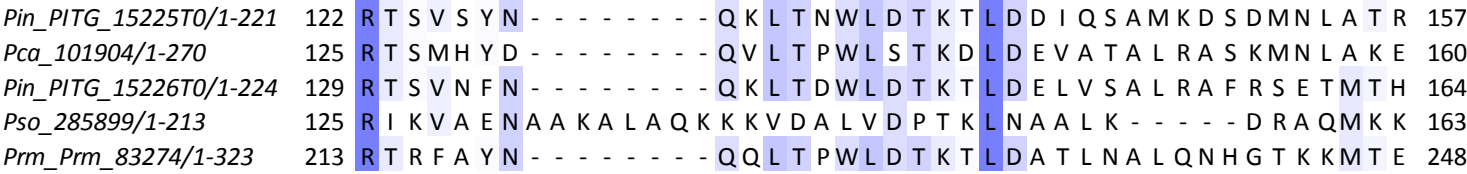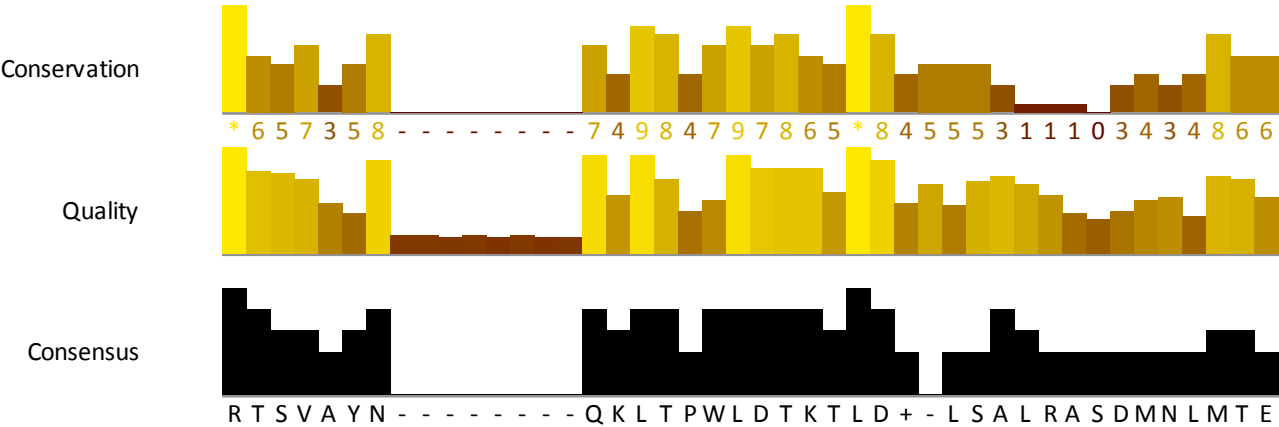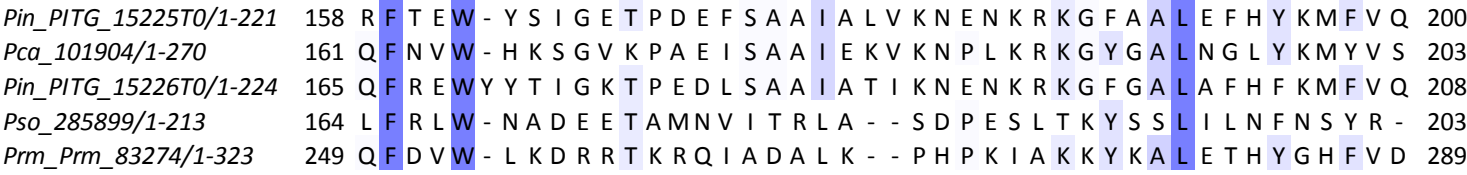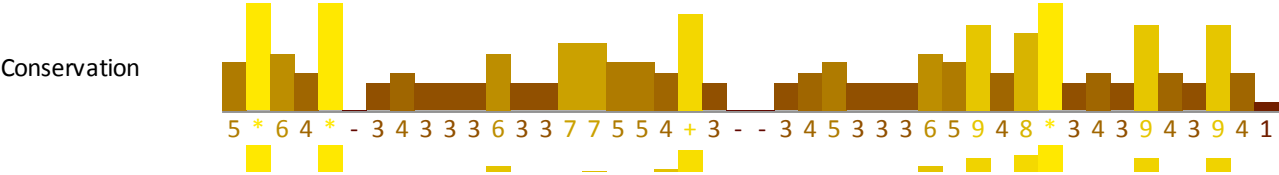

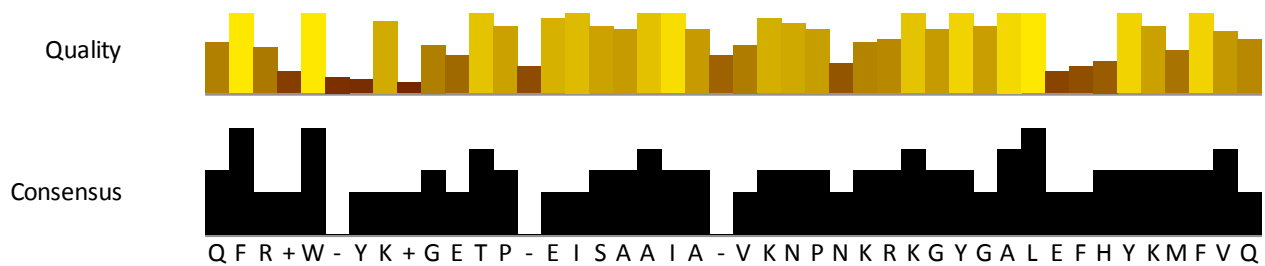

|                               |     |                                                                                         |                     |     |
|-------------------------------|-----|-----------------------------------------------------------------------------------------|---------------------|-----|
| <i>Pin_PITG_15225T0/1-221</i> | 201 | M S D K K A A D A A T - - - - -                                                         | K K A A E - - - - - | 216 |
| <i>Pca_101904/1-270</i>       | 204 | G E A K K T A R A A A K K T E E F A A K R A Q A K K I A E A A A K R A Q E I K T Q K E T |                     | 247 |
| <i>Pin_PITG_15226T0/1-224</i> | 209 | R E E N N A - - - - -                                                                   | K M A A E - - - - - | 219 |
| <i>Pso_285899/1-213</i>       | 204 | - - - - -                                                                               | M S V A G - - - - - | 208 |
| <i>Prm_Prm_83274/1-323</i>    | 290 | F Q P I K A K R A A A E K A K K A A E E A A E A K K A A E - - - - -                     |                     | 318 |

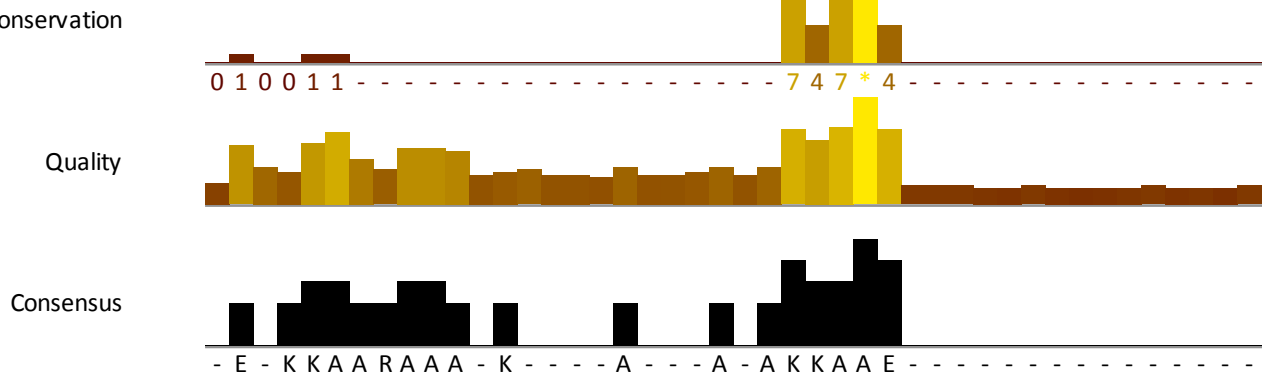

|                               |     |                                               |     |
|-------------------------------|-----|-----------------------------------------------|-----|
| <i>Pin_PITG_15225T0/1-221</i> | 217 | - - - - - A A A A A                           | 221 |
| <i>Pca_101904/1-270</i>       | 248 | A K K I A D A A A K R A A E L K A K A A V A A | 270 |
| <i>Pin_PITG_15226T0/1-224</i> | 220 | - - - - - N A A A I                           | 224 |
| <i>Pso_285899/1-213</i>       | 209 | - - - - - I T A K G                           | 213 |
| <i>Prm_Prm_83274/1-323</i>    | 319 | - - - - - V V E A S                           | 323 |

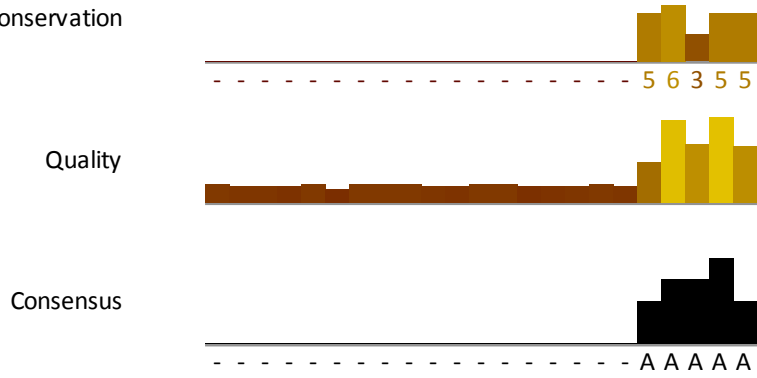



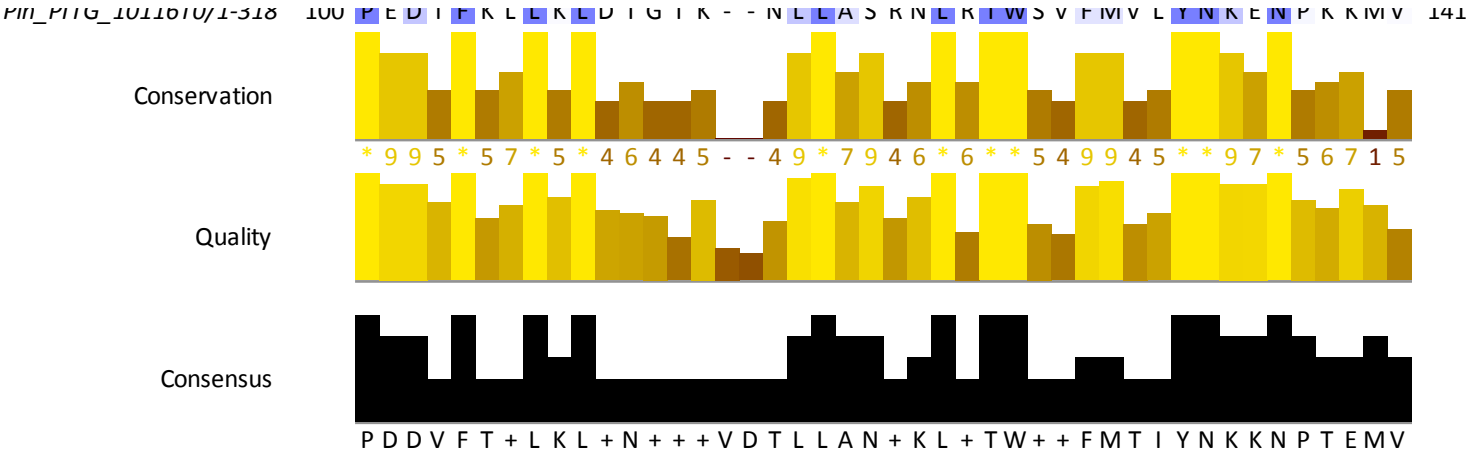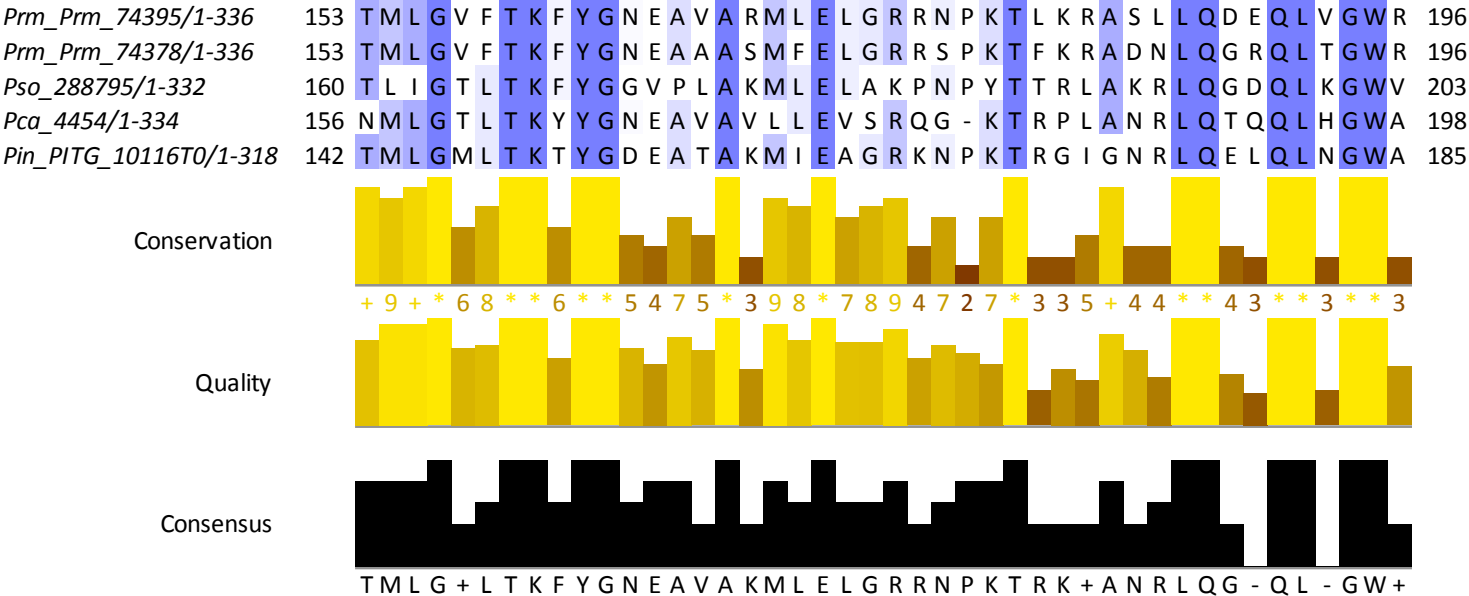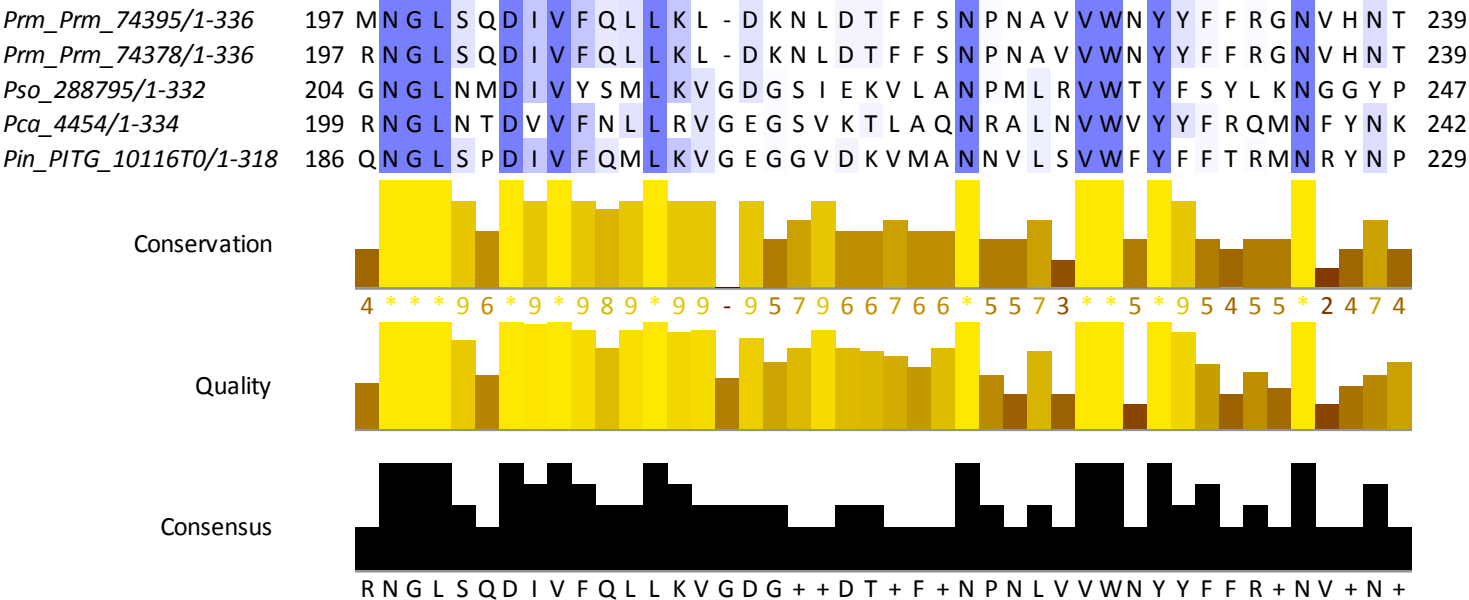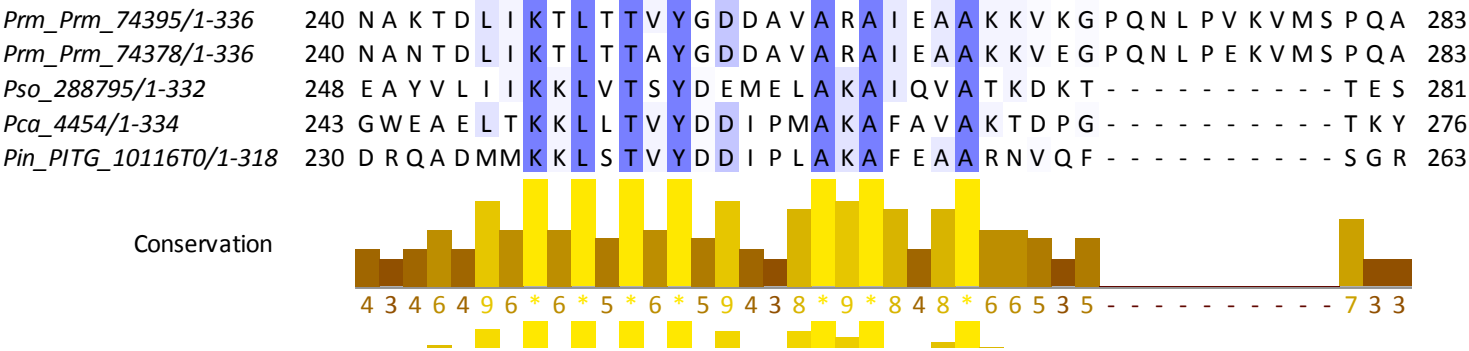

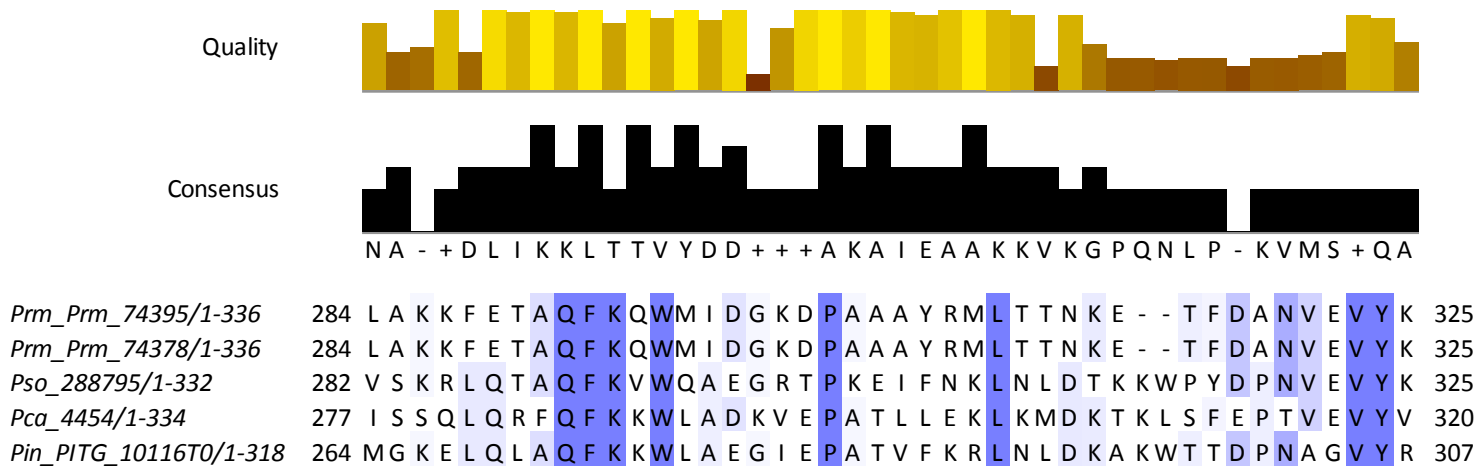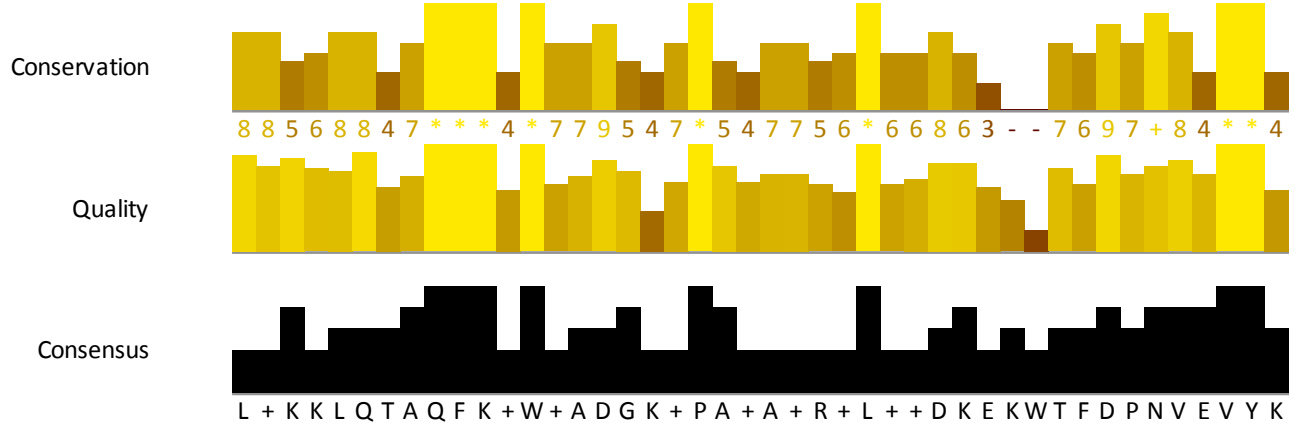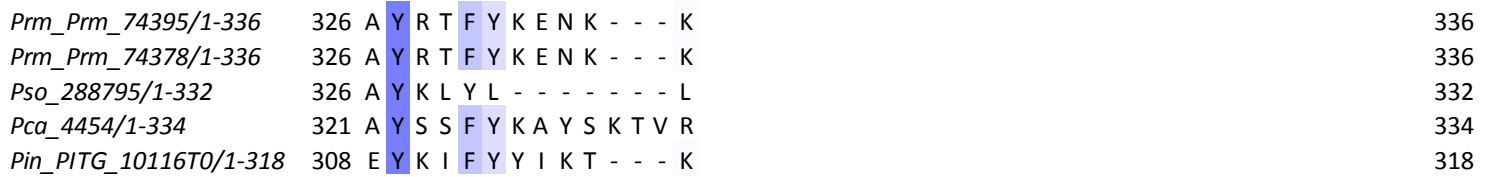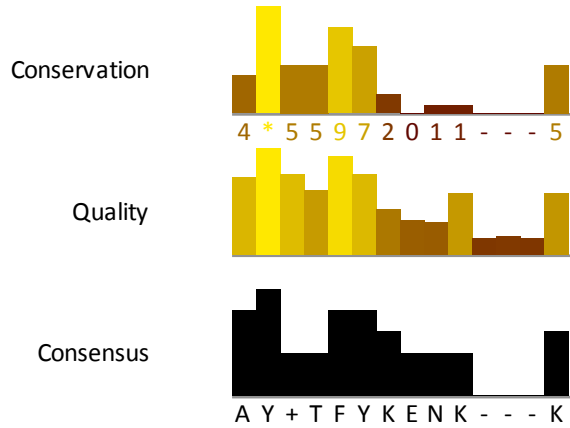

Ortholog 19

|                        |   |   |   |   |   |   |   |   |   |   |   |   |   |   |   |   |   |   |   |   |   |   |   |   |   |   |   |   |   |   |   |   |   |   |   |   |   |   |   |   |   |   |   |   |   |    |
|------------------------|---|---|---|---|---|---|---|---|---|---|---|---|---|---|---|---|---|---|---|---|---|---|---|---|---|---|---|---|---|---|---|---|---|---|---|---|---|---|---|---|---|---|---|---|---|----|
| Pin_PITG_18397T0/1-423 | 1 | M | L | T | L | N | L | - | - | - | - | - | - | L | A | I | Y | V | G | V | L | A | V | V | - | - | A | D | A | Q | V | S | S | D | P | A | S | A | A | Y | S | L | S | A | F | 36 |
| Pin_PITG_18117T0/1-423 | 1 | M | L | T | P | S | L | - | - | - | - | - | - | L | A | I | Y | V | G | V | L | A | V | V | - | - | A | D | A | Q | V | L | S | D | P | A | S | A | A | Y | S | L | S | A | F | 36 |
| Pso_476203/1-429       | 1 | M | I | K | H | G | I | S | K | V | L | A | T | V | A | V | L | F | T | A | V | A | A | A | - | - | S | G | S | T | V | T | S | D | P | T | T | A | T | Y | S | L | S | A | F | 42 |
| Pca_549194/1-423       | 1 | M | L | T | P | A | L | - | - | - | - | - | - | L | V | A | Y | V | G | V | L | A | A | V | - | - | S | N | A | Q | V | T | S | D | P | A | T | A | A | Y | S | F | S | T | F | 36 |
| Prm_Prm_81902/1-426    | 1 | M | L | T | C | K | A | - | - | - | - | - | - | L | L | S | A | V | V | L | L | T | I | V | Q | S | S | N | A | A | V | T | S | D | P | A | A | A | A | Y | S | V | S | A | F | 38 |

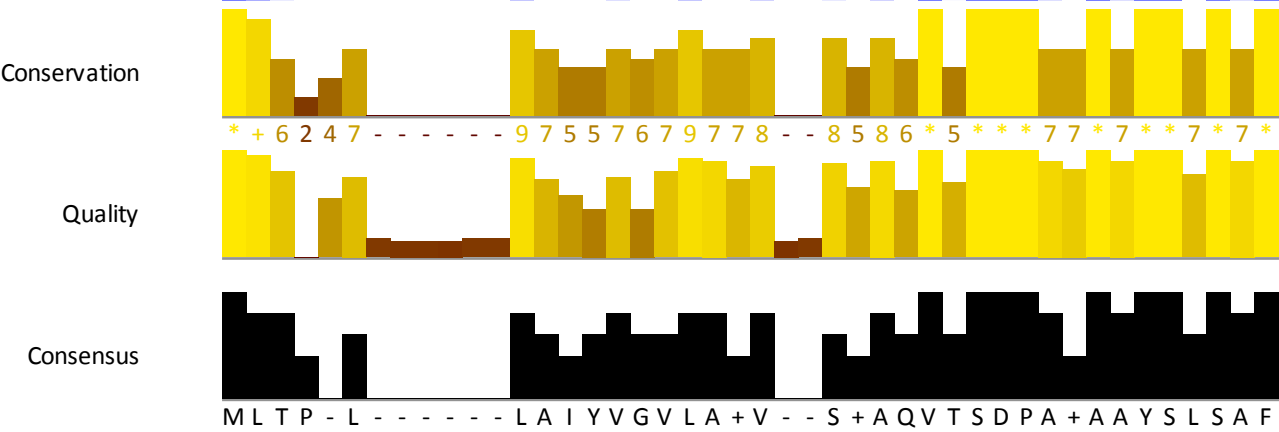

|                        |    |   |   |   |   |   |   |   |   |   |   |   |   |   |   |   |   |   |   |   |   |   |   |   |   |   |   |   |   |   |   |   |   |   |   |   |   |   |   |   |   |   |   |   |   |    |
|------------------------|----|---|---|---|---|---|---|---|---|---|---|---|---|---|---|---|---|---|---|---|---|---|---|---|---|---|---|---|---|---|---|---|---|---|---|---|---|---|---|---|---|---|---|---|---|----|
| Pin_PITG_18397T0/1-423 | 37 | A | I | G | D | W | G | T | T | P | F | K | G | S | C | C | S | R | S | D | T | Y | S | N | Y | D | V | H | A | E | D | I | V | A | S | L | M | N | T | E | A | G | N | A | A | 80 |
| Pin_PITG_18117T0/1-423 | 37 | A | I | G | D | W | G | T | T | P | F | K | G | S | C | C | S | R | S | D | T | Y | S | N | Y | D | V | H | A | E | D | I | V | A | S | L | M | N | T | E | A | G | N | A | A | 80 |
| Pso_476203/1-429       | 43 | A | I | G | D | W | G | T | T | V | A | K | D | S | C | C | S | R | S | S | G | Y | N | N | Y | D | V | N | A | E | D | V | V | A | S | L | M | N | T | Q | A | G | D | A | K | 86 |
| Pca_549194/1-423       | 37 | A | I | G | D | W | G | T | T | T | F | K | G | S | C | C | S | R | S | D | A | Y | N | N | Y | D | V | N | A | E | D | V | V | A | T | L | M | D | I | Q | A | G | I | A | S | 80 |
| Prm_Prm_81902/1-426    | 39 | A | I | G | D | W | G | T | T | P | Y | K | G | S | C | C | S | R | S | A | T | F | N | N | F | D | V | V | A | E | D | V | V | A | S | L | M | N | T | E | A | G | N | A | P | 82 |

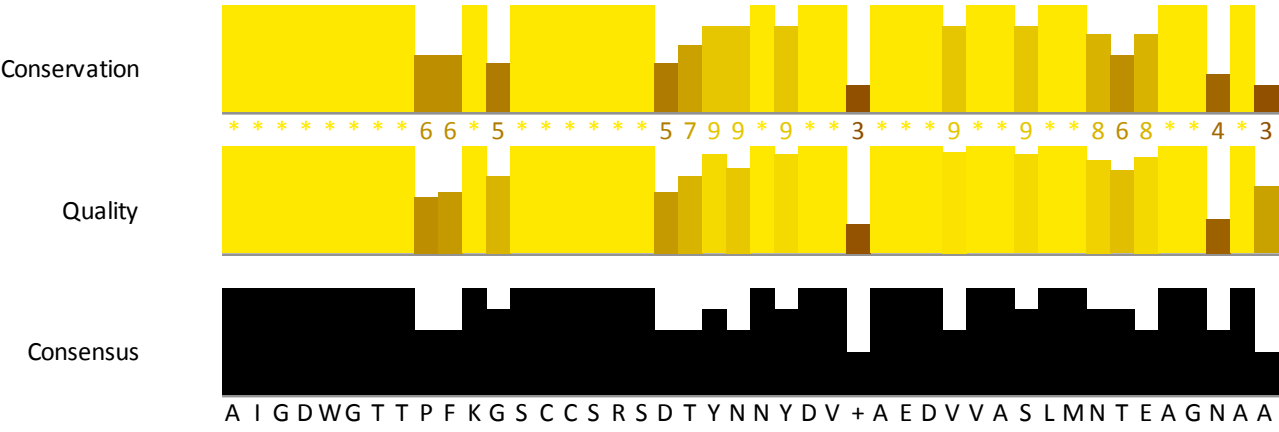

|                        |    |   |   |   |   |   |   |   |   |   |   |   |   |   |   |   |   |   |   |   |   |   |   |   |   |   |   |   |   |   |   |   |   |   |   |   |   |   |   |   |   |   |   |   |   |     |
|------------------------|----|---|---|---|---|---|---|---|---|---|---|---|---|---|---|---|---|---|---|---|---|---|---|---|---|---|---|---|---|---|---|---|---|---|---|---|---|---|---|---|---|---|---|---|---|-----|
| Pin_PITG_18397T0/1-423 | 81 | V | K | P | K | L | I | I | G | H | G | D | N | F | Y | W | T | G | I | N | S | L | E | G | R | D | S | R | F | A | T | T | F | E | E | K | F | N | G | N | N | I | K | T | I | 124 |
| Pin_PITG_18117T0/1-423 | 81 | V | K | P | K | L | I | I | G | H | G | D | N | F | Y | W | T | G | I | N | S | L | E | G | R | D | S | R | F | A | T | T | F | E | E | K | F | N | G | N | N | I | K | T | I | 124 |
| Pso_476203/1-429       | 87 | V | K | P | K | V | I | I | G | H | G | D | N | F | Y | W | T | G | I | N | S | L | E | G | R | D | S | R | F | T | T | T | F | E | D | K | Y | D | G | K | N | L | K | G | I | 130 |
| Pca_549194/1-423       | 81 | V | K | P | K | L | V | I | G | H | G | D | N | F | Y | W | T | G | I | N | S | L | E | G | R | D | S | R | F | T | T | T | F | E | E | K | F | D | G | A | N | I | K | S | I | 124 |
| Prm_Prm_81902/1-426    | 83 | V | K | P | K | V | I | M | G | H | G | D | N | F | Y | W | T | G | I | N | S | L | E | G | R | D | S | R | F | T | T | T | F | E | E | K | F | D | G | A | N | I | K | T | T | 126 |

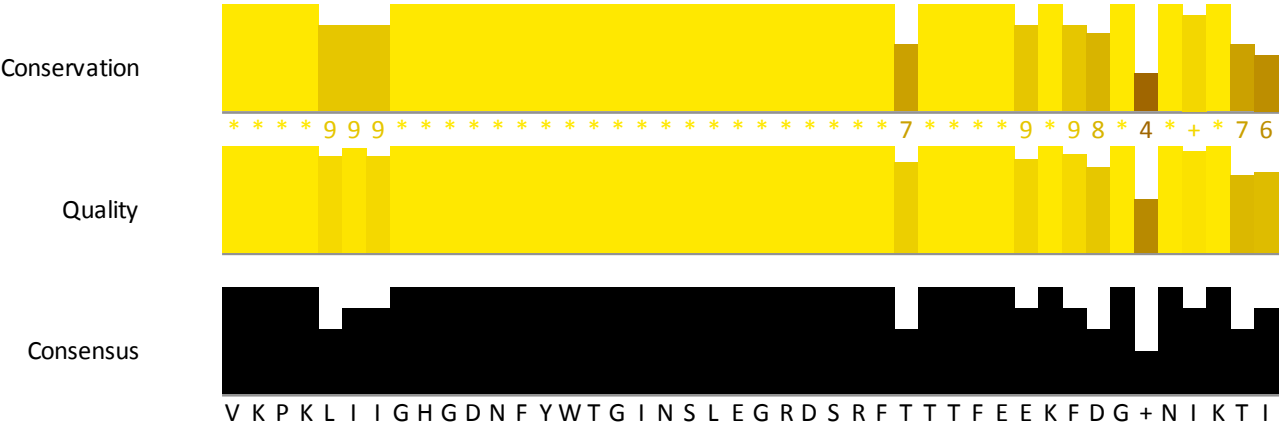

|                        |     |   |   |   |   |   |   |   |   |   |   |   |   |   |   |   |   |   |   |   |   |   |   |   |   |   |   |   |   |   |   |   |   |   |   |   |   |   |   |   |   |   |   |   |   |     |
|------------------------|-----|---|---|---|---|---|---|---|---|---|---|---|---|---|---|---|---|---|---|---|---|---|---|---|---|---|---|---|---|---|---|---|---|---|---|---|---|---|---|---|---|---|---|---|---|-----|
| Pin_PITG_18397T0/1-423 | 125 | P | W | V | N | V | L | G | N | H | D | Y | G | G | A | S | Y | V | C | N | Q | G | D | N | N | A | K | C | E | T | T | D | A | L | L | Q | G | L | D | N | K | F | K | W | Q | 168 |
| Pin_PITG_18117T0/1-423 | 125 | P | W | V | N | V | L | G | N | H | D | Y | G | G | A | S | Y | V | C | N | Q | G | D | N | N | A | K | C | E | T | T | D | A | L | L | Q | G | L | D | N | K | F | T | W | Q | 168 |
| Pso_476203/1-429       | 131 | P | W | V | N | V | L | G | N | H | D | Y | G | G | A | S | Y | I | C | N | S | G | D | N | N | A | K | C | E | S | T | E | A | L | I | Q | G | L | E | N | K | F | K | W | Q | 174 |
| Pca_549194/1-423       | 125 | P | W | V | N | V | L | G | N | H | D | Y | G | G | A | S | Y | V | C | N | S | G | D | N | N | A | K | C | E | S | T | E | A | L | L | Q | G | I | D | N | K | F | N | W | Q | 168 |
| Prm_Prm_81902/1-426    | 127 | P | W | V | N | V | L | G | N | H | D | Y | G | G | A | S | Y | I | C | N | S | G | D | N | N | A | K | C | E | N | T | E | A | L | I | Q | G | L | E | N | K | F | K | W | Q | 170 |

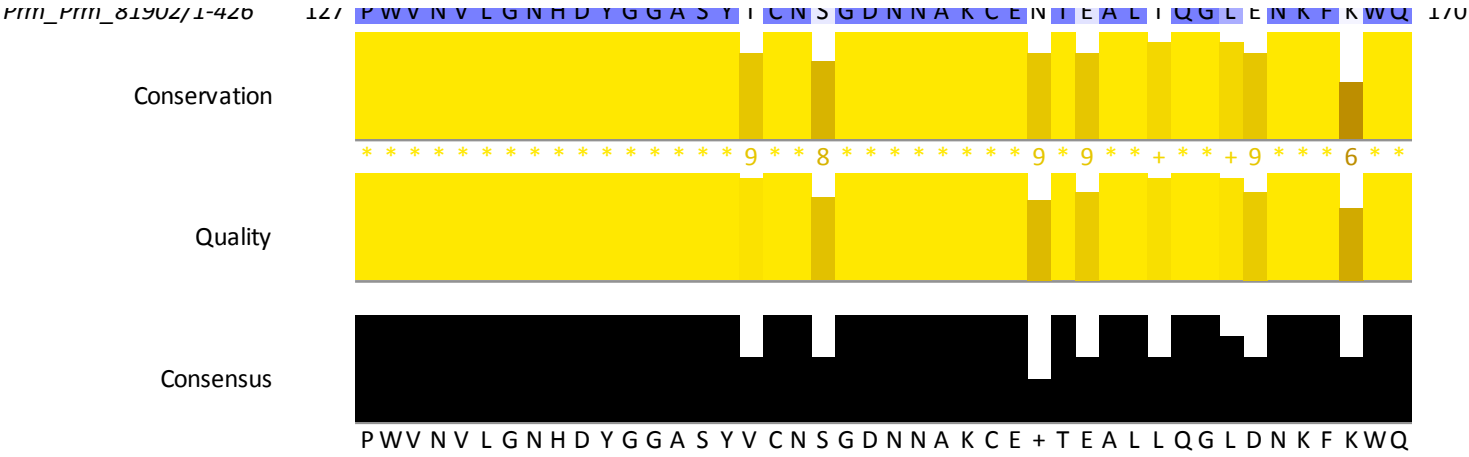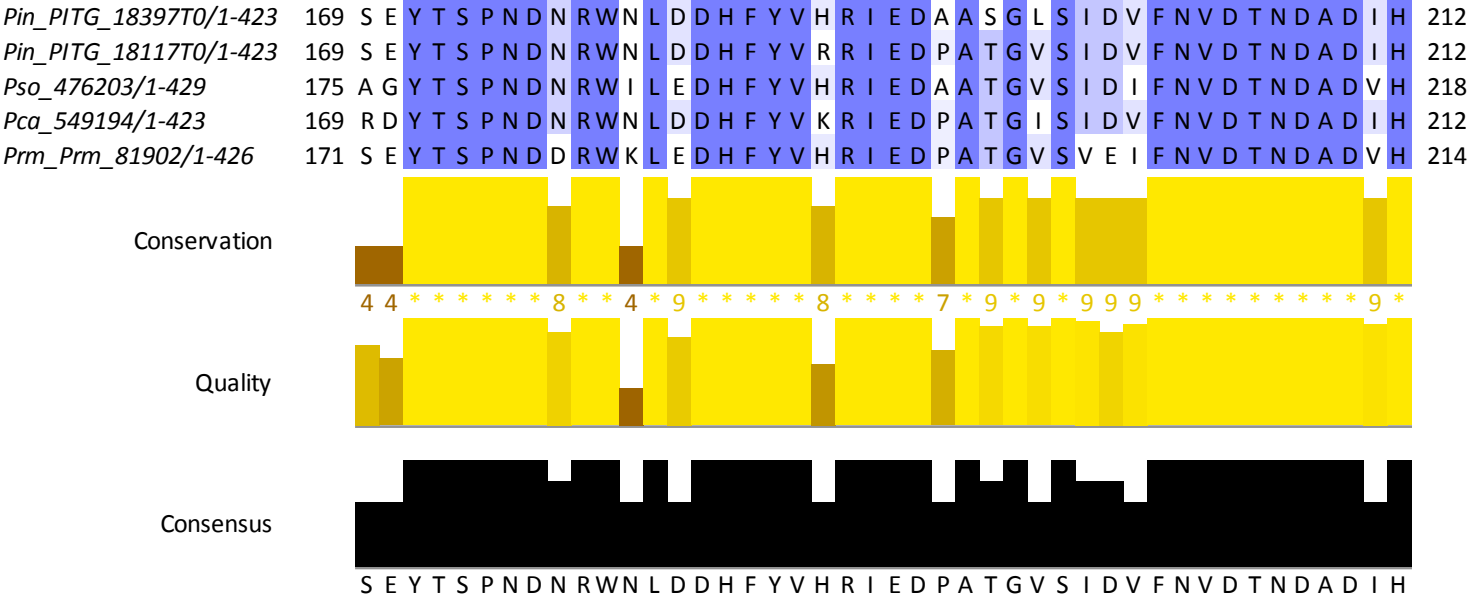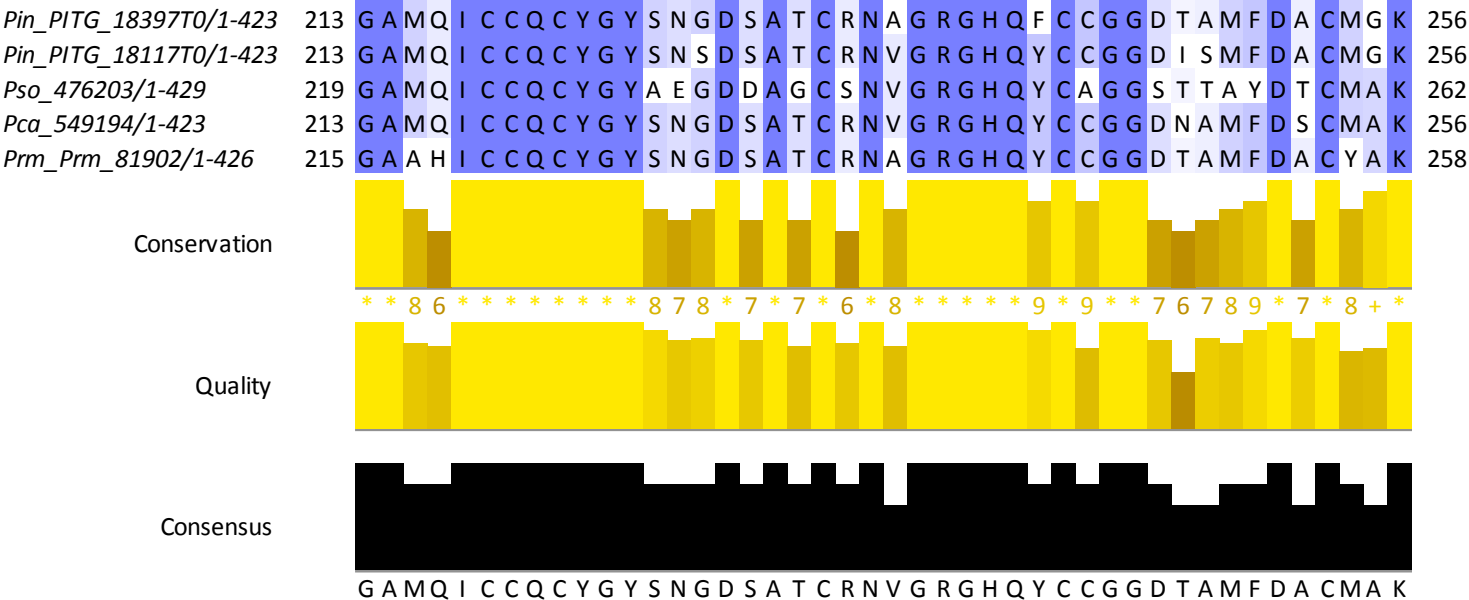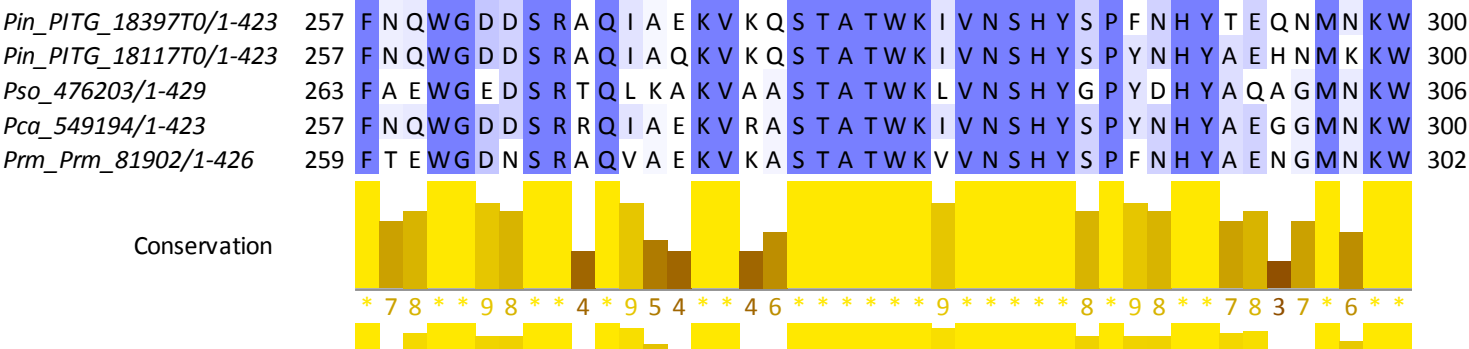

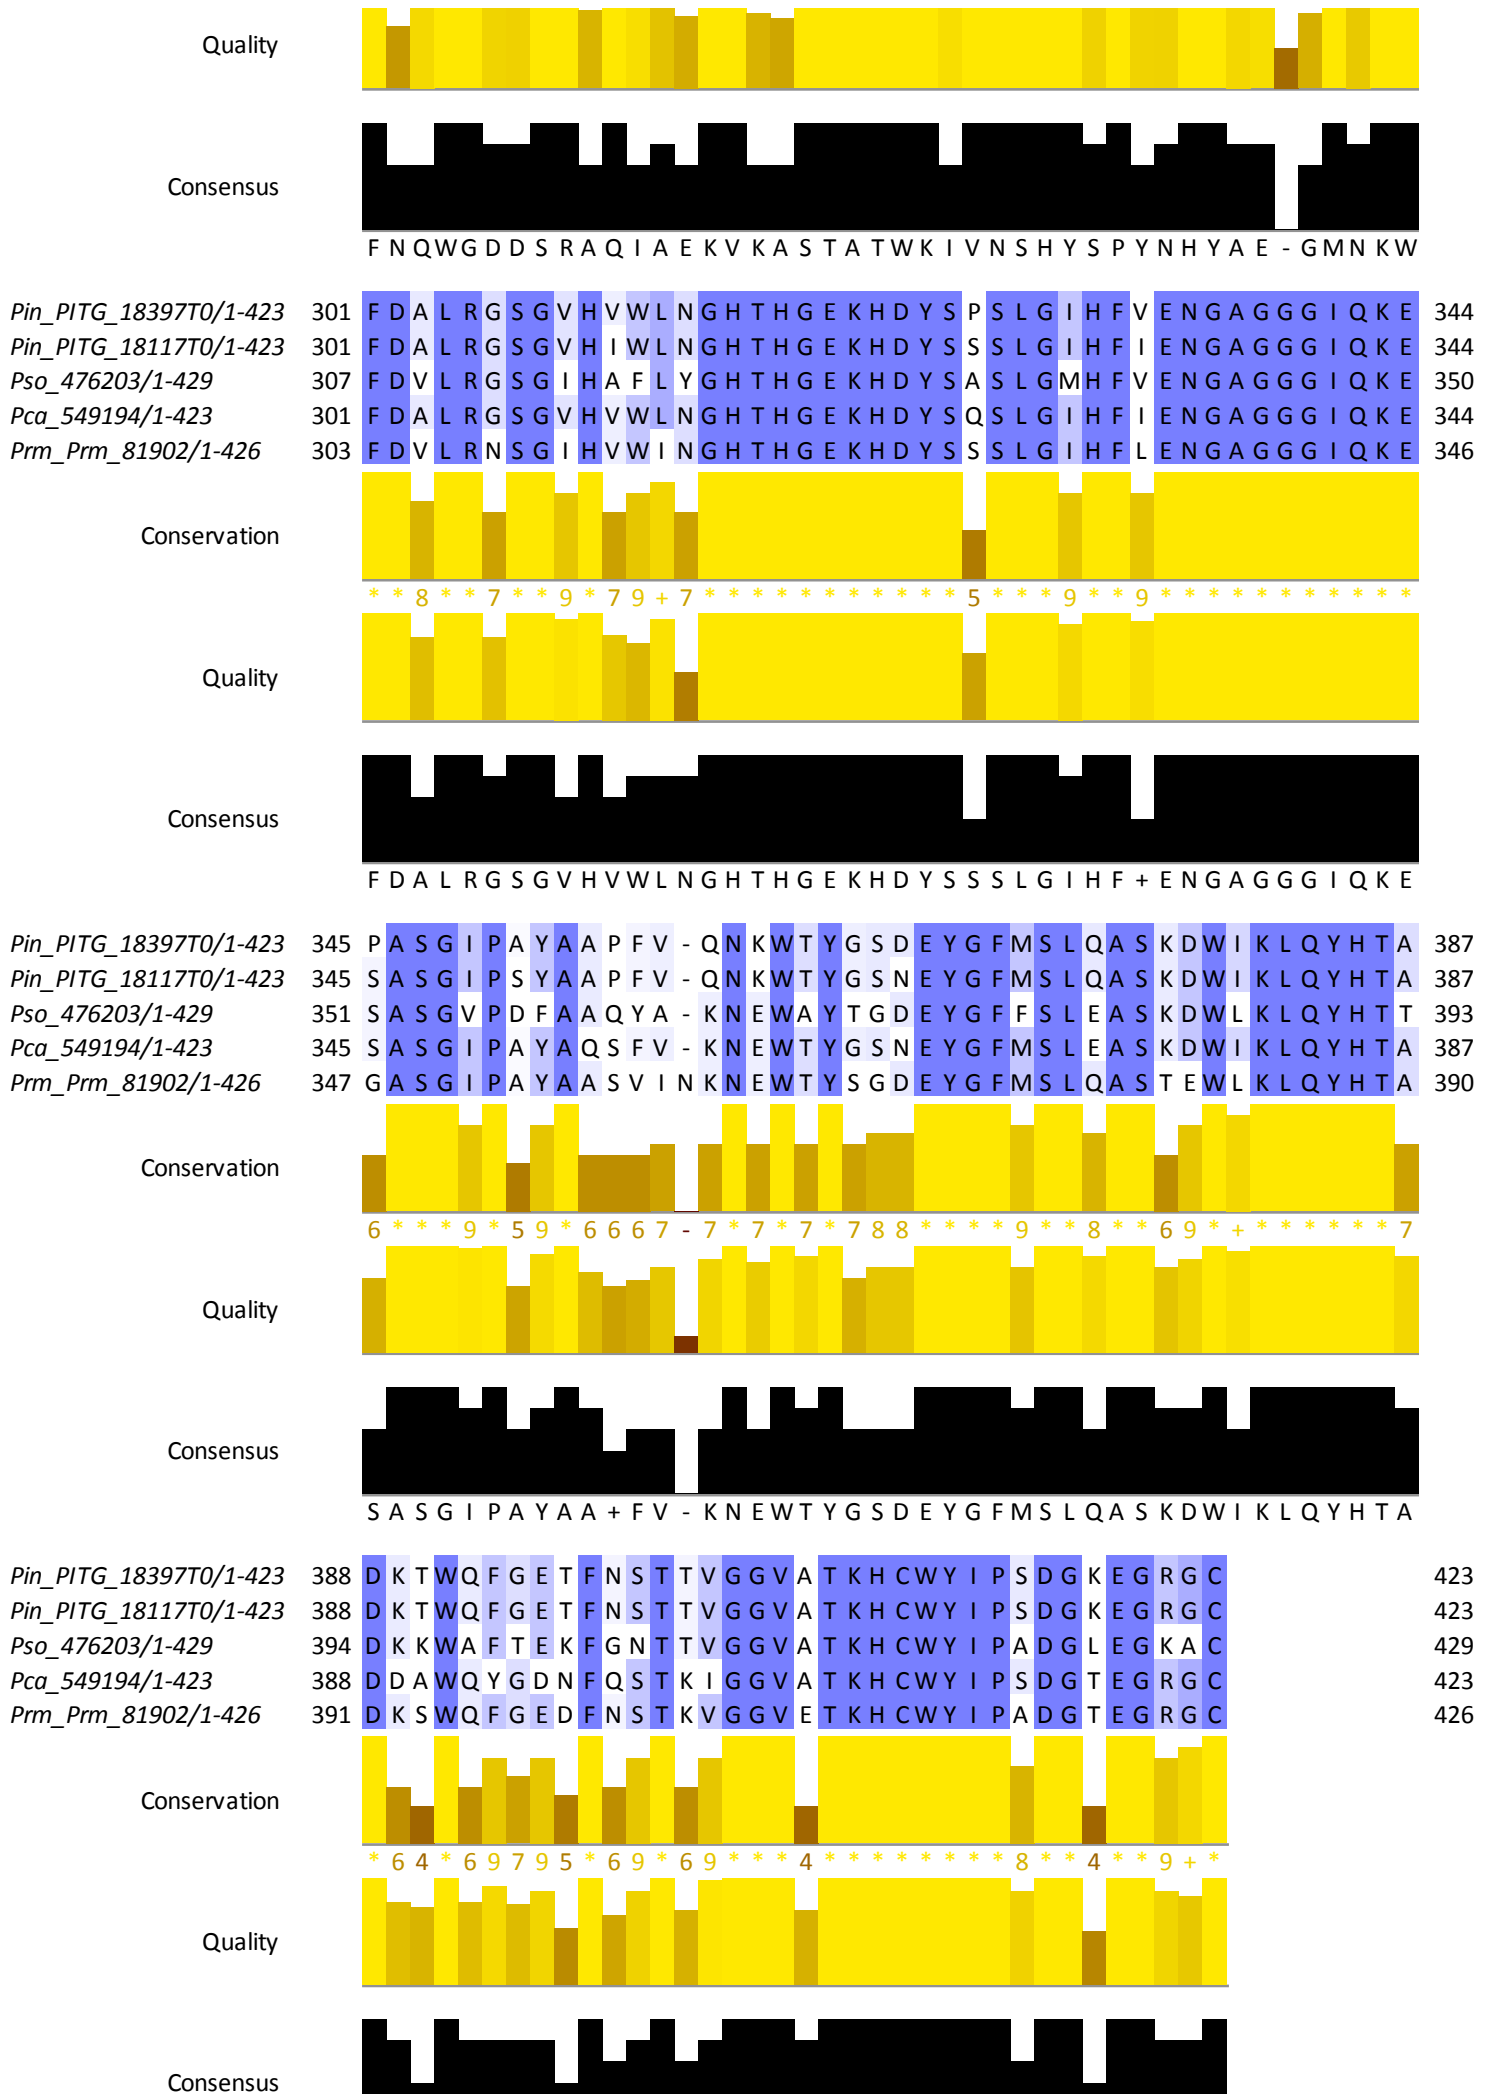

D K T W Q F G E T F N S T T V G G V A T K H C W Y I P S D G + E G R G C

Ortholog 20

|                               |   |   |   |   |   |   |   |   |   |   |   |   |   |   |   |   |   |   |   |   |   |   |   |   |   |   |   |   |   |   |   |   |   |   |   |   |   |   |   |   |   |   |   |    |    |    |
|-------------------------------|---|---|---|---|---|---|---|---|---|---|---|---|---|---|---|---|---|---|---|---|---|---|---|---|---|---|---|---|---|---|---|---|---|---|---|---|---|---|---|---|---|---|---|----|----|----|
| <i>Prm_Prm_85073/1-292</i>    | 1 | M | G | L | I | Y | V | V | V | L | A | L | F | V | S | I | A | G | R | G | A | L | G | D | V | A | D | Y | E | S | L | S | T | A | A | Q | T | A | K | F | D | P | P | G  | -  | 43 |
| <i>Pca_101012/1-224</i>       | 1 | M | Q | F | T | Y | V | L | L | L | A | L | C | I | A | I | T | A | S | A | A | V | Q | D | - | N | E | Y | Q | A | - | - | - | - | - | - | - | V | V | S | P | - | - | 32 |    |    |
| <i>Pin_PITG_04099T0/1-202</i> | 1 | M | R | L | P | Y | V | L | L | L | A | V | S | I | A | I | F | S | C | T | A | A | A | S | E | Q | E | A | A | V | T | L | Q | A | K | R | W | G | S | L | H | P | - | -  | 41 |    |
| <i>Pso_286058/1-274</i>       | 1 | M | R | L | A | D | L | A | L | L | V | A | T | L | F | I | A | S | C | N | A | L | S | S | - | S | E | Q | Q | Q | - | - | - | - | - | - | - | R | I | V | P | P | G | A  | 35 |    |

Conservation

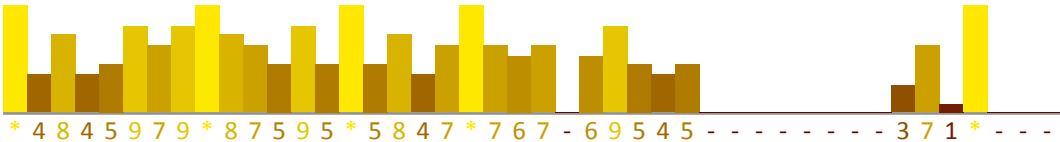

Quality

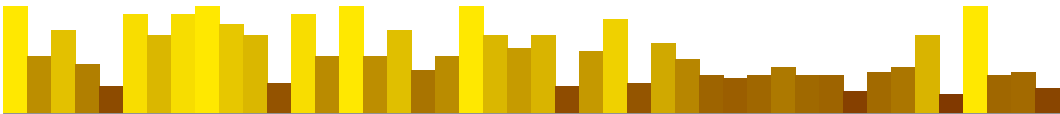

Consensus

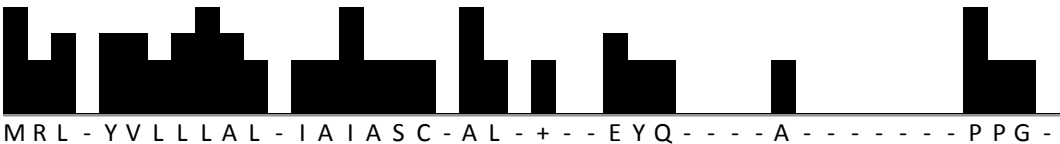

|                               |    |   |   |   |   |   |   |   |   |   |   |   |   |   |   |   |   |   |   |   |   |   |   |   |   |   |   |   |   |   |   |   |   |   |   |   |   |   |   |   |   |   |   |    |    |
|-------------------------------|----|---|---|---|---|---|---|---|---|---|---|---|---|---|---|---|---|---|---|---|---|---|---|---|---|---|---|---|---|---|---|---|---|---|---|---|---|---|---|---|---|---|---|----|----|
| <i>Prm_Prm_85073/1-292</i>    | 44 | - | V | A | R | S | F | - | A | D | H | D | D | M | A | S | K | R | L | R | S | T | G | T | I | - | I | D | K | D | D | S | V | D | S | E | E | R | A | I | T | I | P | G  | 84 |
| <i>Pca_101012/1-224</i>       | 33 | - | - | - | - | - | - | - | - | - | - | - | - | - | F | A | K | R | S | L | R | S | V | D | T | G | - | T | E | S | D | - | - | - | D | E | E | R | G | I | - | I | P | -  | 57 |
| <i>Pin_PITG_04099T0/1-202</i> | 42 | - | - | - | - | A | T | A | P | G | Y | R | D | T | S | G | R | R | L | R | S | D | D | S | L | P | I | V | D | D | D | V | N | T | E | E | R | G | I | - | - | A | S | 79 |    |
| <i>Pso_286058/1-274</i>       | 36 | D | I | P | R | S | L | A | A | A | S | E | D | I | T | V | K | S | S | L | R | Y | G | D | A | L | - | - | A | A | D | E | - | - | N | D | E | E | R | G | L | - | - | -  | 71 |

Conservation

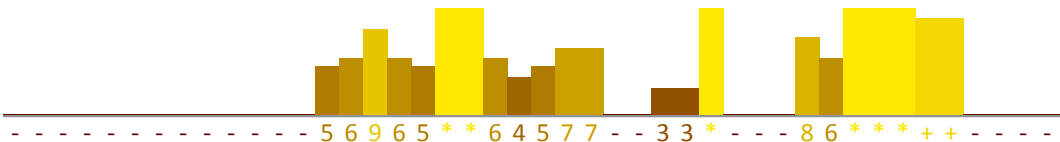

Quality

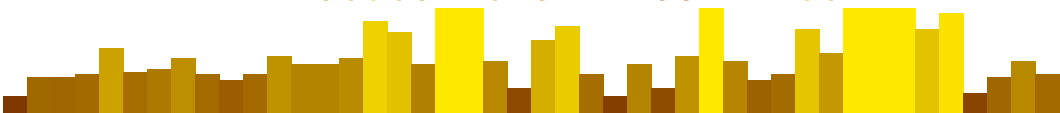

Consensus

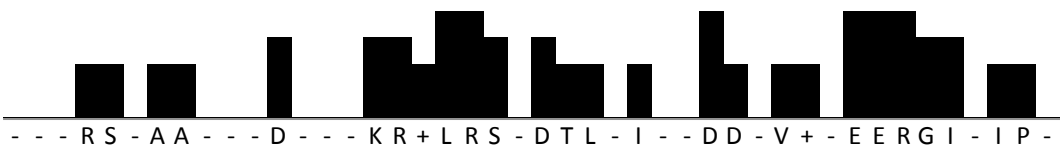

|                               |    |   |   |   |   |   |   |   |   |   |   |   |   |   |   |   |   |   |   |   |   |   |   |   |   |   |   |   |   |   |   |   |   |   |   |   |   |   |   |   |   |   |   |   |     |     |
|-------------------------------|----|---|---|---|---|---|---|---|---|---|---|---|---|---|---|---|---|---|---|---|---|---|---|---|---|---|---|---|---|---|---|---|---|---|---|---|---|---|---|---|---|---|---|---|-----|-----|
| <i>Prm_Prm_85073/1-292</i>    | 85 | L | D | Q | L | K | S | L | V | K | K | G | - | - | - | S | S | K | V | D | K | L | I | E | L | L | K | Y | K | F | W | L | G | I | G | K | T | D | N | D | I | N | K | L | 124 |     |
| <i>Pca_101012/1-224</i>       | 58 | - | S | S | L | K | D | I | V | K | K | G | - | - | - | T | S | K | V | S | D | W | S | L | L | R | K | Y | K | S | L | Q | K | A | G | R | T | D | D | D | I | Y | K | L | 96  |     |
| <i>Pin_PITG_04099T0/1-202</i> | 80 | F | T | K | I | N | E | M | I | K | K | G | K | S | A | V | S | A | K | A | S | N | K | M | L | W | L | K | Y | Q | K | L | L | G | Q | K | L | S | D | L | D | I | T | G | V   | 123 |
| <i>Pso_286058/1-274</i>       | 72 | - | S | S | L | K | - | - | - | - | - | - | - | - | - | - | A | K | I | G | A | L | F | N | K | L | K | Y | K | Y | W | V | K | R | G | K | S | E | A | E | I | Y | N | I | 103 |     |

Conservation

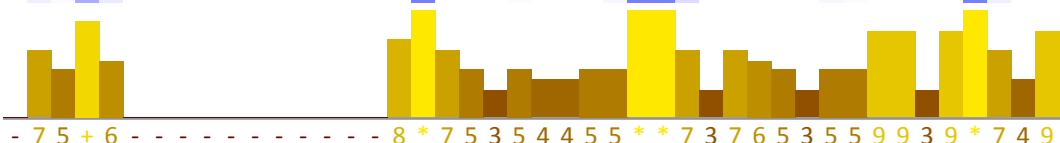

Quality

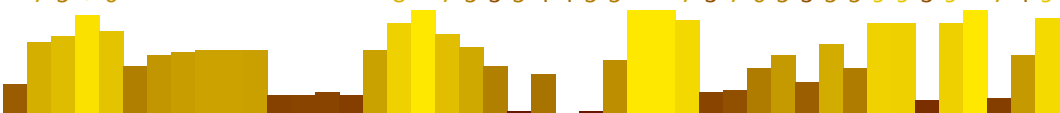

Consensus

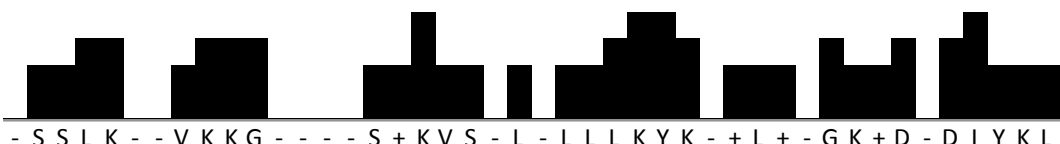

|                               |     |   |   |   |   |   |   |   |   |   |   |   |   |   |   |   |   |   |   |   |   |   |   |   |   |   |   |   |   |   |   |   |   |   |   |   |   |   |   |   |   |   |     |     |   |     |
|-------------------------------|-----|---|---|---|---|---|---|---|---|---|---|---|---|---|---|---|---|---|---|---|---|---|---|---|---|---|---|---|---|---|---|---|---|---|---|---|---|---|---|---|---|---|-----|-----|---|-----|
| <i>Prm_Prm_85073/1-292</i>    | 125 | W | A | K | Q | G | K | S | T | D | D | I | Y | K | L | W | L | K | L | G | K | T | D | E | D | I | F | K | M | L | - | - | - | - | - | - | - | - | - | - | - | - | 153 |     |   |     |
| <i>Pca_101012/1-224</i>       | 97  | W | V | R | Q | R | K | N | T | D | Q | I | Y | T | R | W | I | R | L | G | K | S | E | E | E | V | S | Q | L | F | L | K | H | - | - | - | - | - | - | - | - | - | -   | 128 |   |     |
| <i>Pin_PITG_04099T0/1-202</i> | 124 | W | L | K | Q | G | K | S | A | D | T | I | F | E | R | W | I | R | L | S | K | S | P | R | Q | A | A | T | N | L | L | N | H | - | - | - | - | - | - | - | - | - | -   | 155 |   |     |
| <i>Pso_286058/1-274</i>       | 104 | W | V | K | Q | G | K | T | D | K | Q | I | Y | N | L | L | A | Q | Q | G | N | S | D | R | N | I | Y | D | V | F | L | R | Q | R | L | S | D | A | Q | I | Y | F | M   | F   | R | 147 |

Conservation

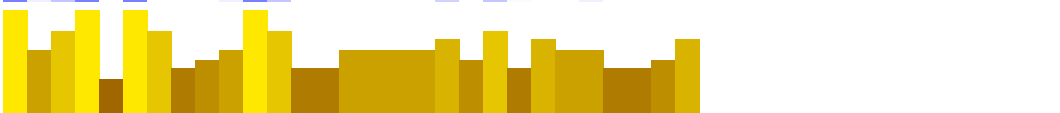



|                               |     | D | T | R | V | I | D | D | T | E | R | D | T | R | N | T | R | Q | T | R |     |
|-------------------------------|-----|---|---|---|---|---|---|---|---|---|---|---|---|---|---|---|---|---|---|---|-----|
| <i>Prm_Prm_85073/1-292</i>    | 282 | A | Y | N | D | M | L | G | I | S | N | L |   |   |   |   |   |   |   |   | 292 |
| <i>Pca_101012/1-224</i>       | 215 | F | Y | R | - | A | K | K | Y | R | T | S |   |   |   |   |   |   |   |   | 224 |
| <i>Pin_PITG_04099T0/1-202</i> |     | - | - | - | - | - | - | - | - | - | - | - |   |   |   |   |   |   |   |   |     |
| <i>Pso_286058/1-274</i>       | 264 | Y | F | N | E | N | Y | G | I | R | E | W |   |   |   |   |   |   |   |   | 274 |

Conservation

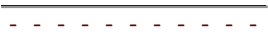

Quality

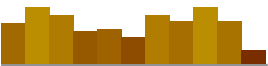

Consensus

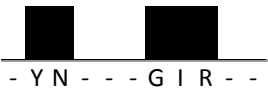

Ortholog 21

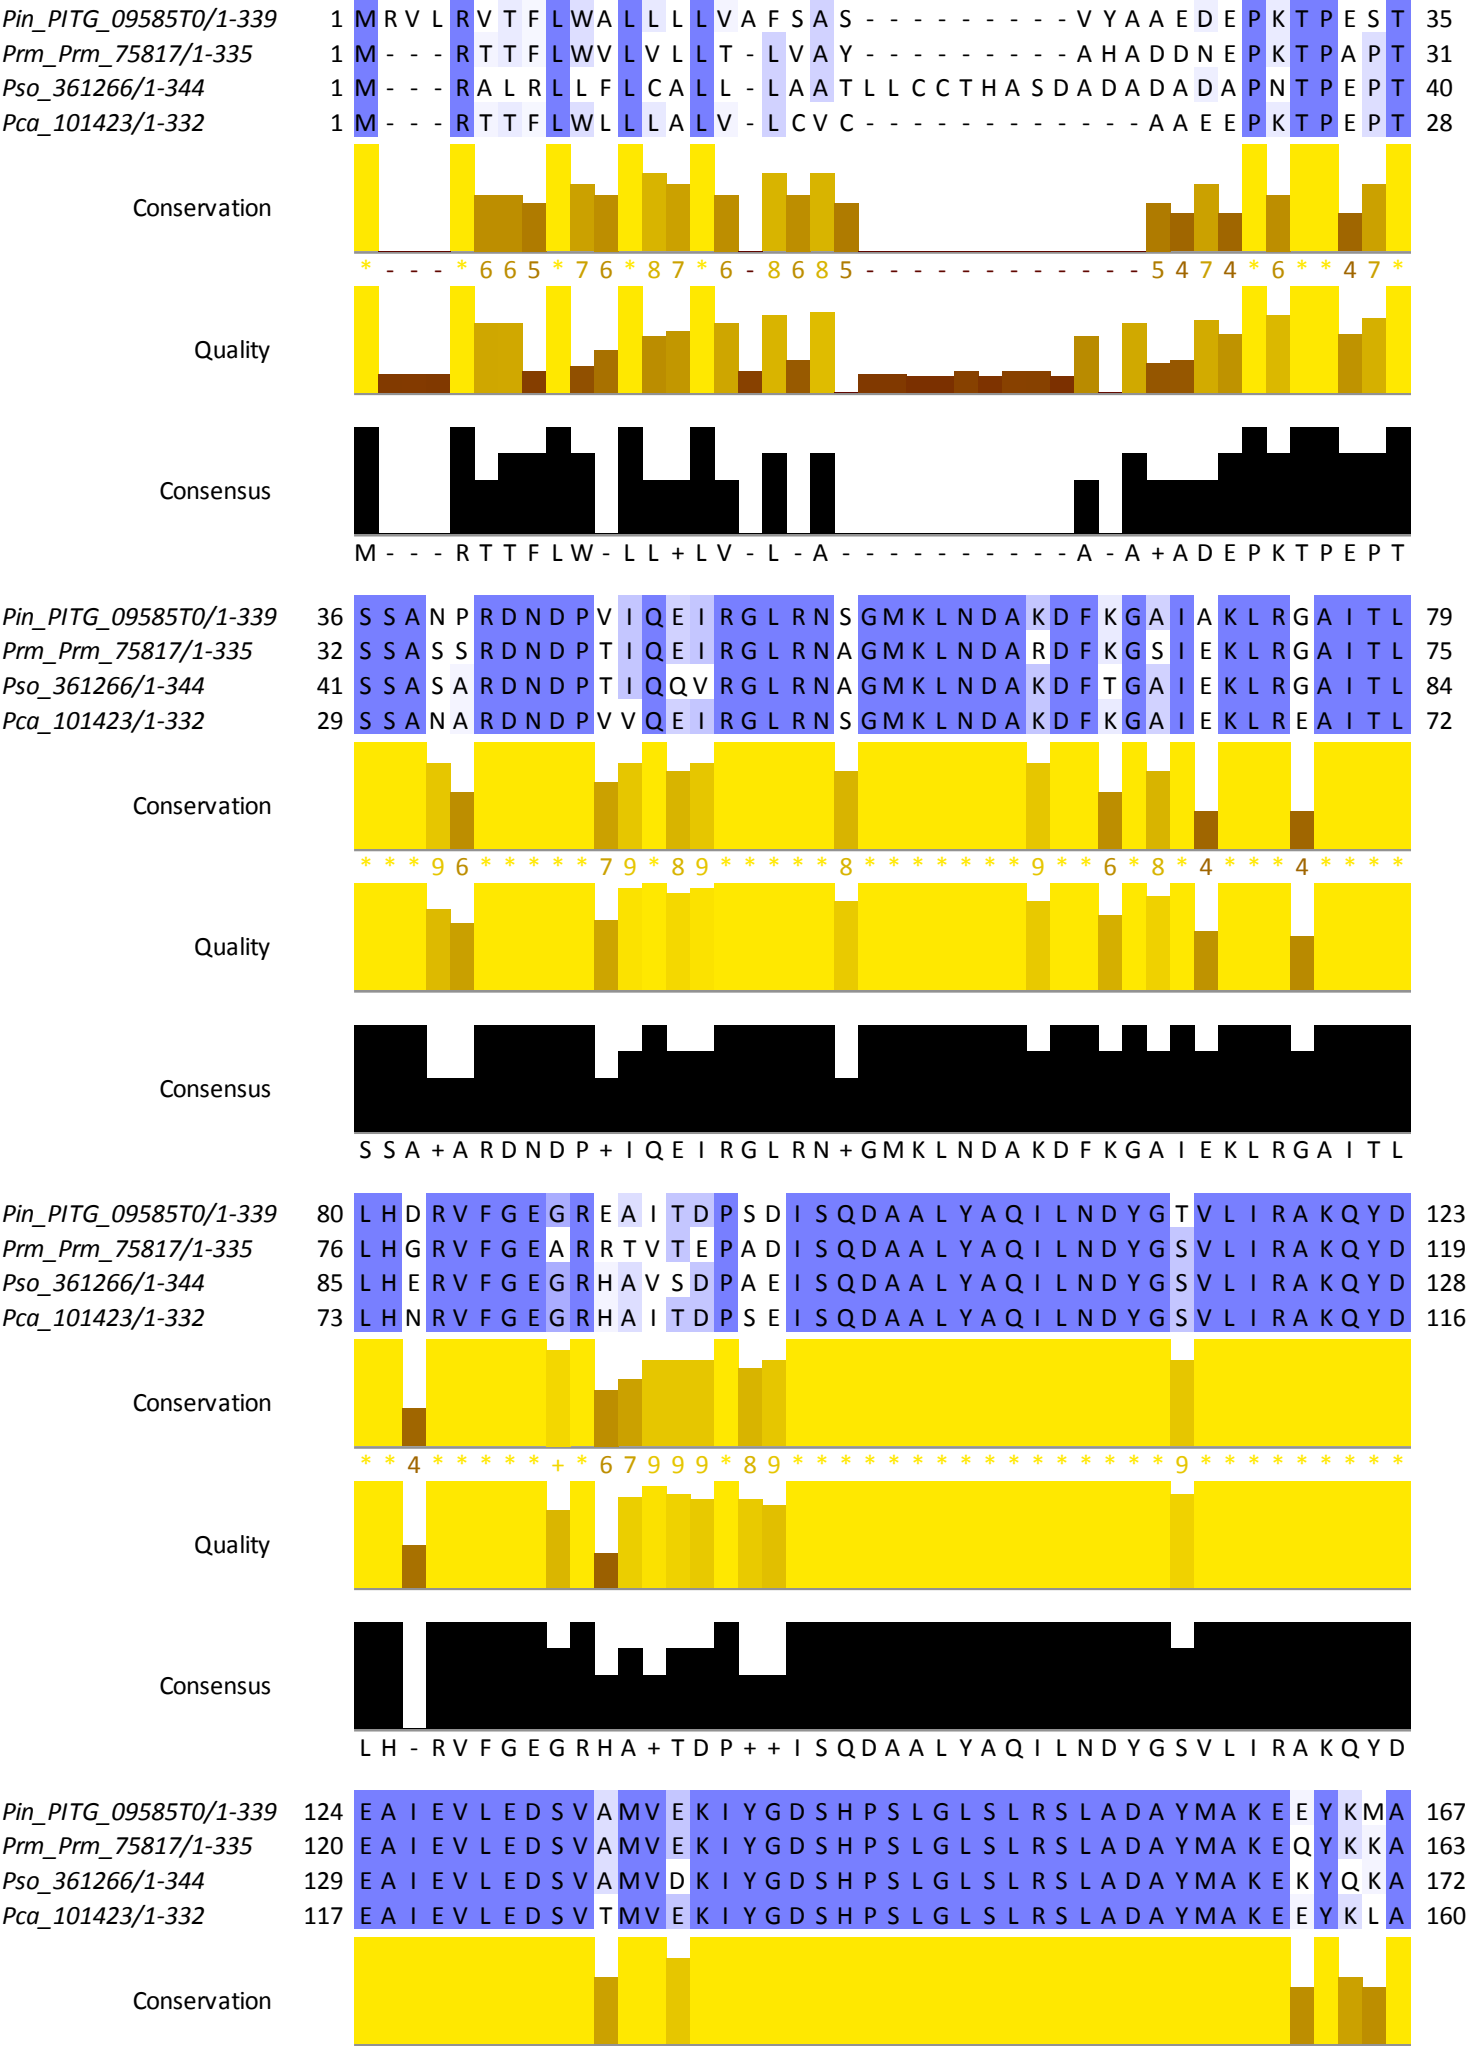

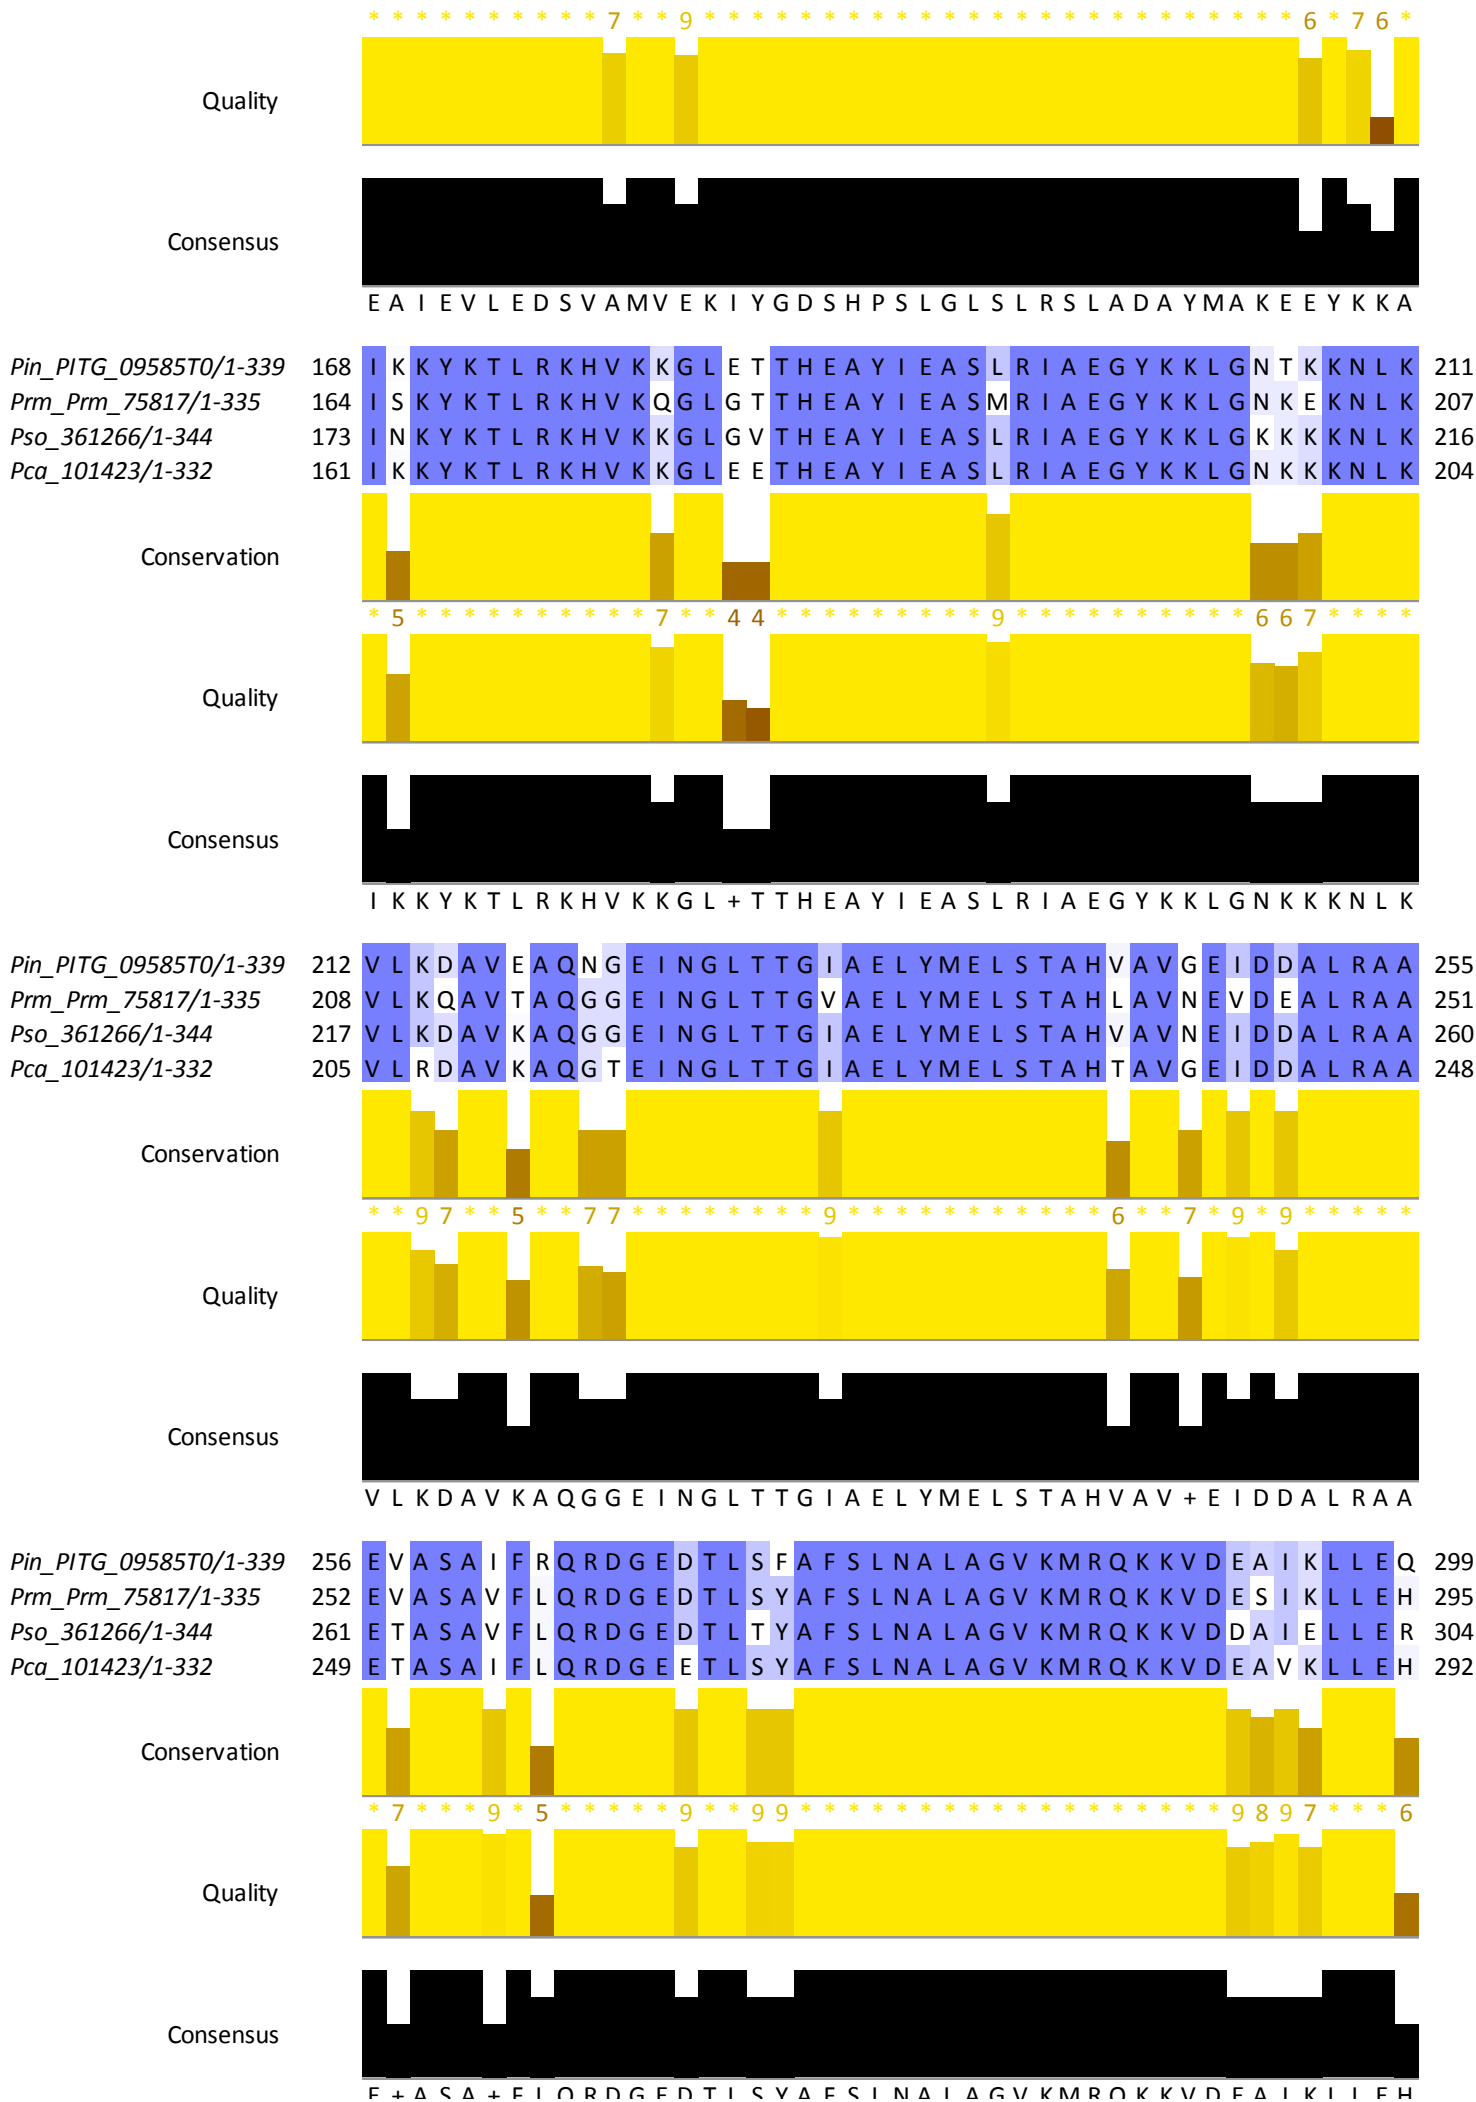

E I A S A T I E Q R G E D T E S T A T S E N D E A S V K M R Q K R V D E A T R E E L I I

|                               |     |   |   |   |   |   |   |   |   |   |   |   |   |   |   |   |   |   |   |   |   |   |   |   |   |   |   |   |   |   |   |   |   |   |   |   |   |   |   |   |   |  |     |
|-------------------------------|-----|---|---|---|---|---|---|---|---|---|---|---|---|---|---|---|---|---|---|---|---|---|---|---|---|---|---|---|---|---|---|---|---|---|---|---|---|---|---|---|---|--|-----|
| <i>Pin_PITG_09585T0/1-339</i> | 300 | A | H | R | I | A | V | Q | I | Y | G | E | K | D | P | I | T | Q | A | S | A | K | T | L | R | E | V | K | E | Y | K | L | D | L | Q | A | Q | K | D | E | L |  | 339 |
| <i>Prm_Prm_75817/1-335</i>    | 296 | A | H | R | I | A | V | K | I | Y | G | E | N | D | A | I | T | E | A | S | A | K | T | L | K | E | V | R | E | Y | Q | L | D | I | Q | A | E | K | D | E | L |  | 335 |
| <i>Pso_361266/1-344</i>       | 305 | A | H | K | I | A | V | K | I | Y | G | D | N | D | P | I | T | Q | A | S | A | K | T | L | R | E | V | K | E | Y | K | L | D | L | H | A | Q | K | D | E | L |  | 344 |
| <i>Pca_101423/1-332</i>       | 293 | A | H | K | I | A | V | K | I | Y | G | E | N | D | P | I | T | Q | A | S | A | K | T | L | K | E | V | K | E | Y | R | L | D | M | H | A | Q | K | D | E | L |  | 332 |

Conservation

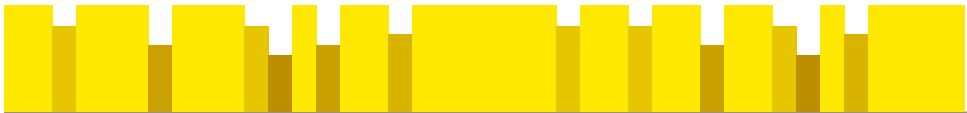

\* \* 9 \* \* \* 7 \* \* \* 9 6 \* 7 \* \* 8 \* \* \* \* \* 9 \* \* 9 \* \* 7 \* \* 9 6 \* 8 \* \* \*

Quality

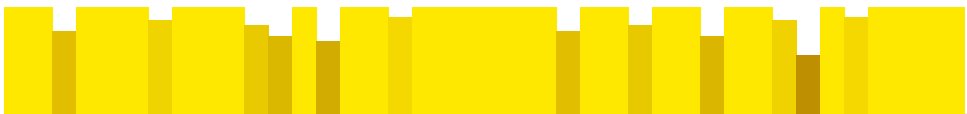

Consensus

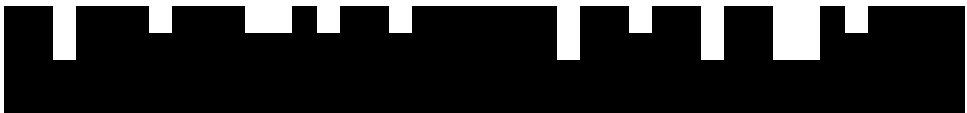

A H + I A V K I Y G E N D P I T Q A S A K T L + E V K E Y K L D L + A Q K D E L

Ortholog 22

|                               |   |   |   |   |   |   |   |   |   |   |   |   |   |   |   |   |   |   |   |   |   |   |   |   |   |   |   |   |   |   |   |   |   |   |   |   |   |   |   |   |   |   |   |   |    |    |   |   |    |
|-------------------------------|---|---|---|---|---|---|---|---|---|---|---|---|---|---|---|---|---|---|---|---|---|---|---|---|---|---|---|---|---|---|---|---|---|---|---|---|---|---|---|---|---|---|---|---|----|----|---|---|----|
| <i>Prm_Prm_78400/1-207</i>    | 1 | M | R | V | R | - | - | - | - | - | L | L | L | A | A | A | T | L | L | A | S | I | D | A | T | T | S | T | V | Q | L | K | A | S | R | V | W | S | S | - | - | - | - | K | 34 |    |   |   |    |
| <i>Pso_286050/1-208</i>       | 1 | M | R | S | P | R | I | G | L | L | L | L | I | L | N | G | V | S | L | L | A | N | C | R | A | L | P | A | S | D | Q | L | Q | R | V | R | V | V | S | S | D | L | A | P | S  | 44 |   |   |    |
| <i>Pca_129643/1-184</i>       | 1 | M | R | W | S | - | - | - | - | - | - | A | V | I | Y | I | A | - | L | L | A | L | I | E | A | L | - | - | - | - | - | - | - | - | - | - | - | - | - | - | - | - | - | D | V  | V  | V | A | 23 |
| <i>Pin_PITG_15287T0/1-213</i> | 1 | M | R | A | C | N | - | - | - | - | - | T | L | L | P | T | A | I | V | L | T | S | C | D | A | L | S | A | H | - | R | A | Q | I | M | N | V | A | T | S | D | L | I | S | P  | 38 |   |   |    |

Conservation

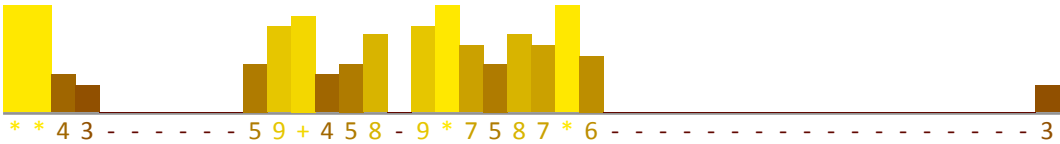

Quality

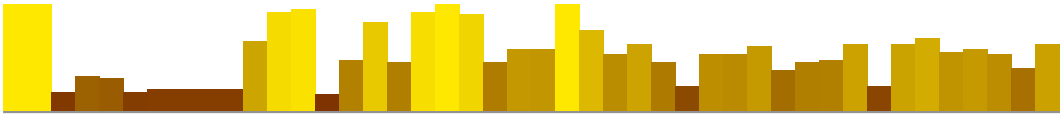

Consensus

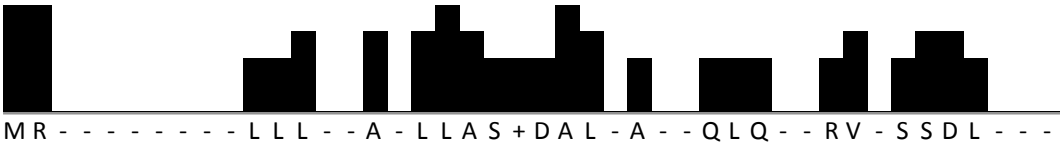

|                               |    |   |   |   |   |   |   |   |   |   |   |   |   |   |   |   |   |   |   |   |   |   |   |   |   |   |   |   |   |   |   |   |   |   |   |   |   |   |   |   |   |   |   |   |    |   |    |    |
|-------------------------------|----|---|---|---|---|---|---|---|---|---|---|---|---|---|---|---|---|---|---|---|---|---|---|---|---|---|---|---|---|---|---|---|---|---|---|---|---|---|---|---|---|---|---|---|----|---|----|----|
| <i>Prm_Prm_78400/1-207</i>    | 35 | P | Q | - | - | - | - | - | N | D | R | R | G | L | R | S | N | E | A | V | G | L | E | N | D | S | V | A | D | N | D | N | G | T | A | D | E | S | G | G | S | E | E | R | 72 |   |    |    |
| <i>Pso_286050/1-208</i>       | 45 | A | E | - | - | - | - | - | A | H | T | R | R | L | R | S | S | N | V | M | D | - | E | E | D | G | - | - | - | - | - | - | - | - | - | - | - | - | G | A | T | D | E | D | E  | E | R  | 72 |
| <i>Pca_129643/1-184</i>       | 24 | V | N | P | T | - | - | - | H | D | E | R | L | L | R | T | S | T | S | T | K | - | - | - | - | - | - | - | - | - | - | - | - | - | - | - | - | - | T | S | T | S | E | T | E  | E | R  | 49 |
| <i>Pin_PITG_15287T0/1-213</i> | 39 | I | E | S | T | V | Q | D | D | N | Y | D | R | Q | L | R | G | F | Y | A | T | E | - | N | T | D | P | V | N | N | Q | D | - | - | - | - | - | T | A | H | E | D | G | E | E  | R | 77 |    |

Conservation

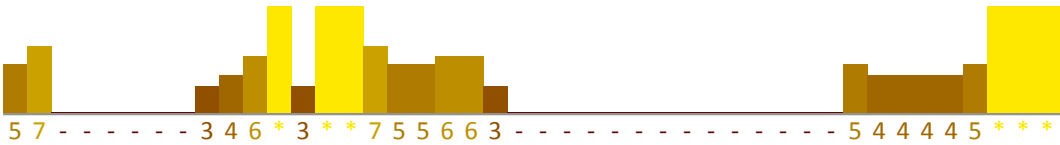

Quality

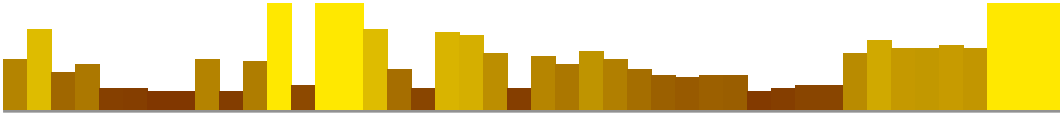

Consensus

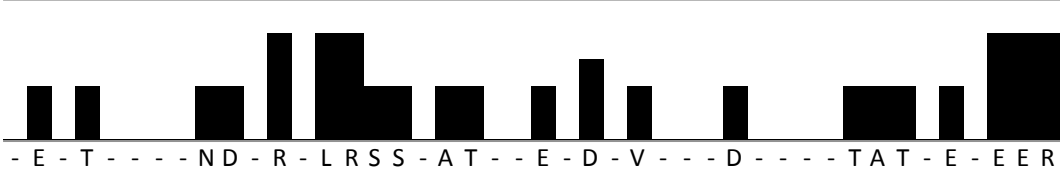

|                               |    |   |   |   |   |   |   |   |   |   |   |   |   |   |   |   |   |   |   |   |   |   |   |   |   |   |   |   |   |   |   |   |   |   |   |   |   |   |   |   |   |   |   |   |   |     |
|-------------------------------|----|---|---|---|---|---|---|---|---|---|---|---|---|---|---|---|---|---|---|---|---|---|---|---|---|---|---|---|---|---|---|---|---|---|---|---|---|---|---|---|---|---|---|---|---|-----|
| <i>Prm_Prm_78400/1-207</i>    | 73 | A | I | D | P | A | V | I | A | K | F | E | A | K | M | D | D | V | K | V | E | A | M | F | R | H | W | F | Q | G | G | K | T | L | A | D | V | R | T | L | L | S | L | P | A | 116 |
| <i>Pso_286050/1-208</i>       | 73 | L | L | N | P | S | A | T | A | K | L | K | A | E | L | E | A | I | N | M | K | H | N | F | R | D | W | F | Q | V | K | K | T | L | E | Q | V | R | S | F | L | G | L | P | A | 116 |
| <i>Pca_129643/1-184</i>       | 50 | A | I | D | A | A | M | I | A | R | L | N | D | E | W | Q | A | A | V | M | R | A | A | Y | A | H | W | F | E | G | G | K | T | K | A | D | V | R | L | I | M | S | L | P | P | 93  |
| <i>Pin_PITG_15287T0/1-213</i> | 78 | V | N | V | A | T | V | L | G | K | G | D | E | A | W | D | D | A | L | M | R | L | A | Y | Q | H | W | F | D | G | G | K | T | S | D | G | M | R | L | I | M | D | L | P | A | 121 |

Conservation

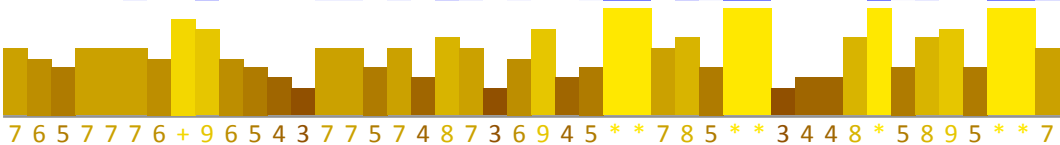

Quality

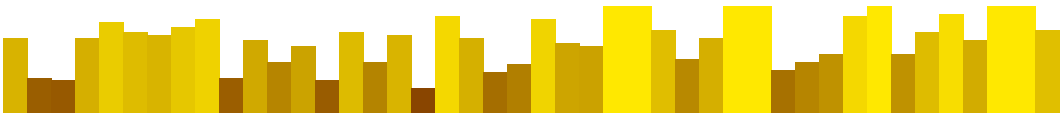

Consensus

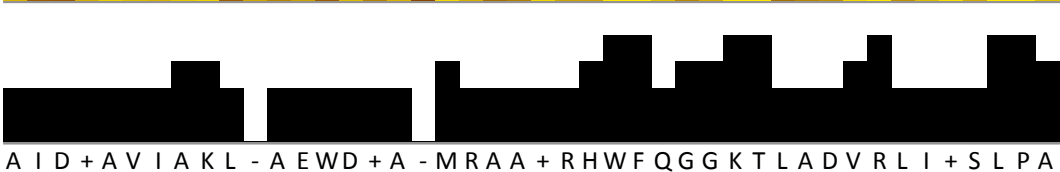

|                               |     |   |   |   |   |   |   |   |   |   |   |   |   |   |   |   |   |   |   |   |   |   |   |   |   |   |   |   |   |   |   |   |   |   |   |   |   |   |   |   |   |   |   |   |     |     |
|-------------------------------|-----|---|---|---|---|---|---|---|---|---|---|---|---|---|---|---|---|---|---|---|---|---|---|---|---|---|---|---|---|---|---|---|---|---|---|---|---|---|---|---|---|---|---|---|-----|-----|
| <i>Prm_Prm_78400/1-207</i>    | 117 | K | G | D | A | V | T | Y | A | H | W | S | M | Y | L | K | Y | L | D | F | Y | K | E | Q | Q | A | F | A | A | V | A | K | A | E | V | I | K | L | R | F | T | Y | K | N | 160 |     |
| <i>Pso_286050/1-208</i>       | 117 | T | G | E | A | V | S | H | A | N | W | A | A | F | Q | N | Y | L | K | Y | V | Q | E | M | E | E | H | A | A | K | V | A | K | A | A | A | K | Q | R | L | D | F | K | G | 160 |     |
| <i>Pca_129643/1-184</i>       | 94  | T | G | E | A | V | G | Y | A | N | W | P | K | Y | L | K | Y | L | E | F | L | K | E | K | E | V | E | A | A | N | I | A | A | V | T | A | Y | K | W | R | R | V | Y | K | D   | 137 |
| <i>Pin_PITG_15287T0/1-213</i> | 122 | K | G | E | A | L | R | H | P | N | W | G | K | Y | I | K | Y | L | E | F | V | K | E | K | K | K | E | A | A | D | A | A | V | A | A | L | K | R | R | R | T | Y | R | G | 165 |     |

Conservation

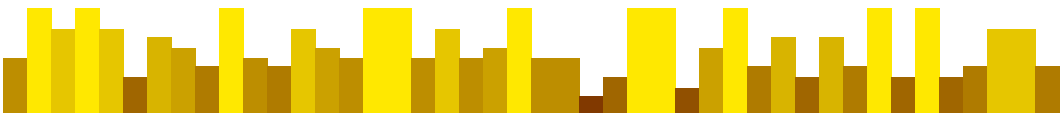

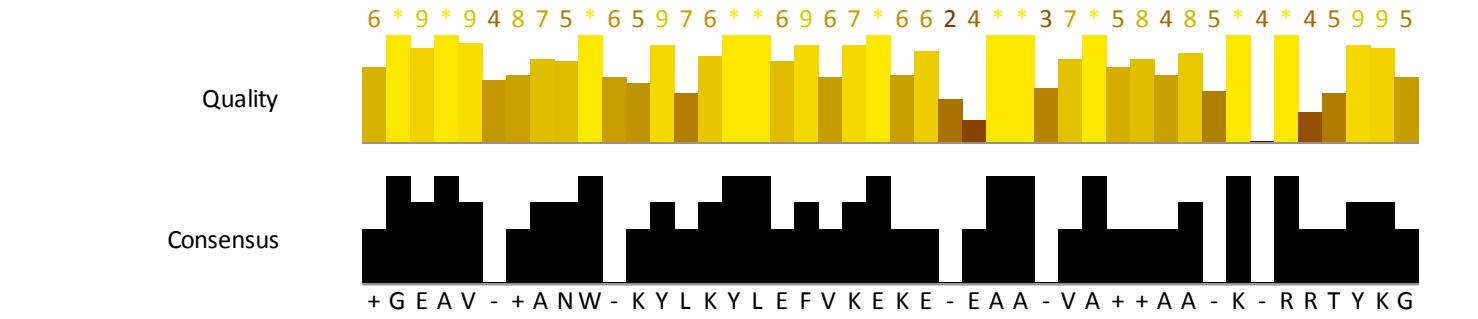

|                               |     |   |   |   |   |   |   |   |   |   |   |   |   |   |   |   |   |   |   |   |   |   |   |   |   |   |   |   |   |   |   |   |   |   |   |   |   |   |   |   |   |   |   |   |   |     |
|-------------------------------|-----|---|---|---|---|---|---|---|---|---|---|---|---|---|---|---|---|---|---|---|---|---|---|---|---|---|---|---|---|---|---|---|---|---|---|---|---|---|---|---|---|---|---|---|---|-----|
| <i>Prm_Prm_78400/1-207</i>    | 161 | W | F | L | D | R | K | S | S | K | Q | V | R | E | I | L | E | L | P | P | T | G | N | A | A | G | Y | A | N | W | E | K | Y | L | D | Y | L | K | Y | C | E | E | I | S | K | 204 |
| <i>Pso_286050/1-208</i>       | 161 | W | Y | L | E | G | K | S | F | K | Q | V | R | A | I | L | G | L | P | E | K | G | P | A | P | T | N | P | N | W | E | T | F | L | D | Y | L | R | F | F | K | E | Y | S | Q | 204 |
| <i>Pca_129643/1-184</i>       | 138 | W | F | F | G | Q | K | T | F | A | E | V | R | E | I | L | K | L | P | L | K | G | E | H | V | D | H | V | N | W | E | I | F | Q | N | Y | L | T | F | Y | K | E | F | S | K | 181 |
| <i>Pin_PITG_15287T0/1-213</i> | 166 | W | Y | V | D | G | K | T | E | K | D | V | R | K | I | F | G | L | P | A | T | G | K | A | K | N | H | P | N | W | A | D | F | Q | E | Y | L | N | V | V | R | E | Y | S | K | 209 |

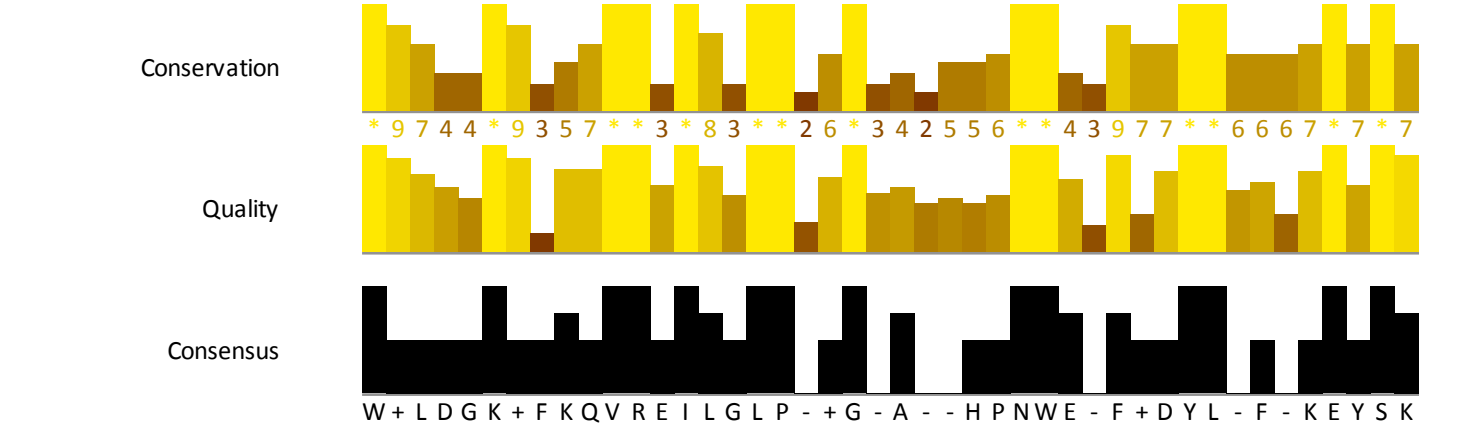

|                               |     |   |   |   |   |     |
|-------------------------------|-----|---|---|---|---|-----|
| <i>Prm_Prm_78400/1-207</i>    | 205 | Q | Y | - | T | 207 |
| <i>Pso_286050/1-208</i>       | 205 | Q | F | P | H | 208 |
| <i>Pca_129643/1-184</i>       | 182 | L | F | - | T | 184 |
| <i>Pin_PITG_15287T0/1-213</i> | 210 | V | V | F | K | 213 |

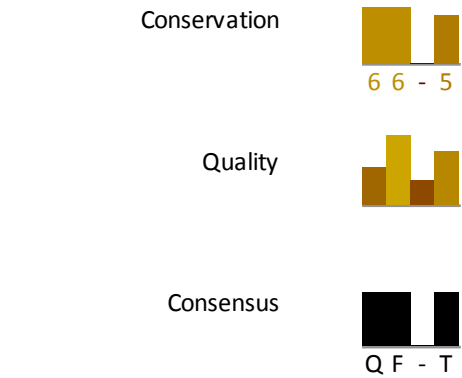

## Ortholog 23

| Accession                     | Sequence                                                                                  | Length |
|-------------------------------|-------------------------------------------------------------------------------------------|--------|
| <i>Pso_246483/1-353</i>       | MMA P F K K S L F V S A V A V A L A T A V A S A E G Y S T A A V S T N S A Y Q A K R M     | 44     |
| <i>Prm_Prm_78163/1-358</i>    | 1 M V V A F K K T L F V S A V A V A L A M S A V S A D S Y S - A A V S S E S T Y E A K R M | 43     |
| <i>Pca_19601/1-245</i>        | 1 M I V S F K K T L F V S A V A V A L A - - - V S V E G Y S G A V - - - E S T Y E T K R M | 38     |
| <i>Pin_PITG_11947T0/1-385</i> | 1 M I N S F K K S L F V T A V A V A L A - - - V S V E G Y T G A A V A T Q S T Y E V K R M | 41     |

  

| Conservation                                                                          | Quality | Consensus                                                                               |
|---------------------------------------------------------------------------------------|---------|-----------------------------------------------------------------------------------------|
|                                                                                       |         |                                                                                         |
| * 8 6 6 * * * 9 * * * 9 * * * * * * - - - 8 * 8 9 8 * 9 - * 8 - - - 7 * 7 * 8 6 * * * |         | M I V S F K K + L F V S A V A V A L A - - - V S + E G Y S G A A V S T E S T Y E A K R M |

| Sequence                      | 89 | S            | L | E | M | A | E | S | D | D | G | S | N | - | - | - | - | A | N | T | P | P | S | S | G | G | D | T | - | - | N | T | W | T | Q | A | P | S | T | N | T | G | G | S   | 125 |   |
|-------------------------------|----|--------------|---|---|---|---|---|---|---|---|---|---|---|---|---|---|---|---|---|---|---|---|---|---|---|---|---|---|---|---|---|---|---|---|---|---|---|---|---|---|---|---|---|-----|-----|---|
| <i>Pso_246483/1-353</i>       | 88 | S            | L | E | M | A | E | S | D | G | G | S | T | G | G | N | T | W | T | Q | A | P | S | T | - | - | G | S | T | G | N | T | W | T | Q | A | P | S | - | - | T | G | S | T   | 127 |   |
| <i>Prm_Prm_78163/1-358</i>    | 83 | S            | L | E | M | A | E | E | S | G | T | G | D | - | - | - | - | - | - | - | - | - | - | - | - | - | K | G | D | N | G | N | T | W | T | Q | A | P | S | - | - | T | G | -   | 111 |   |
| <i>Pca_19601/1-245</i>        | 86 | S            | L | E | M | A | E | P | D | N | G | G | D | I | G | - | - | - | G | D | T | G | G | D | K | G | G | D | T | G | N | T | W | T | Q | A | P | S | T | D | T | G | - | 125 |     |   |
| <i>Pin_PITG_11947T0/1-385</i> |    |              |   |   |   |   |   |   |   |   |   |   |   |   |   |   |   |   |   |   |   |   |   |   |   |   |   |   |   |   |   |   |   |   |   |   |   |   |   |   |   |   |   |     |     |   |
| Conservation                  |    | [Yellow bar] |   |   |   |   |   |   |   |   |   |   |   |   |   |   |   |   |   |   |   |   |   |   |   |   |   |   |   |   |   |   |   |   |   |   |   |   |   |   |   |   |   |     |     |   |
|                               |    | *            | * | * | * | * | * | 4 | 7 | 5 | 7 | 8 | 8 | - | - | - | - | - | - | - | - | - | - | - | - | - | - | * | 7 | + | - | - | * | * | * | * | * | * | * | * | * | * | * | *   | *   | * |
| Quality                       |    | [Yellow bar] |   |   |   |   |   |   |   |   |   |   |   |   |   |   |   |   |   |   |   |   |   |   |   |   |   |   |   |   |   |   |   |   |   |   |   |   |   |   |   |   |   |     |     |   |
| Consensus                     |    | S            | L | E | M | A | E | S | D | G | G | + | D | - | G | - | - | - | - | - | T | P | - | - | K | G | G | D | T | G | G | N | T | W | T | Q | A | P | S | T | - | T | G | G   | -   |   |

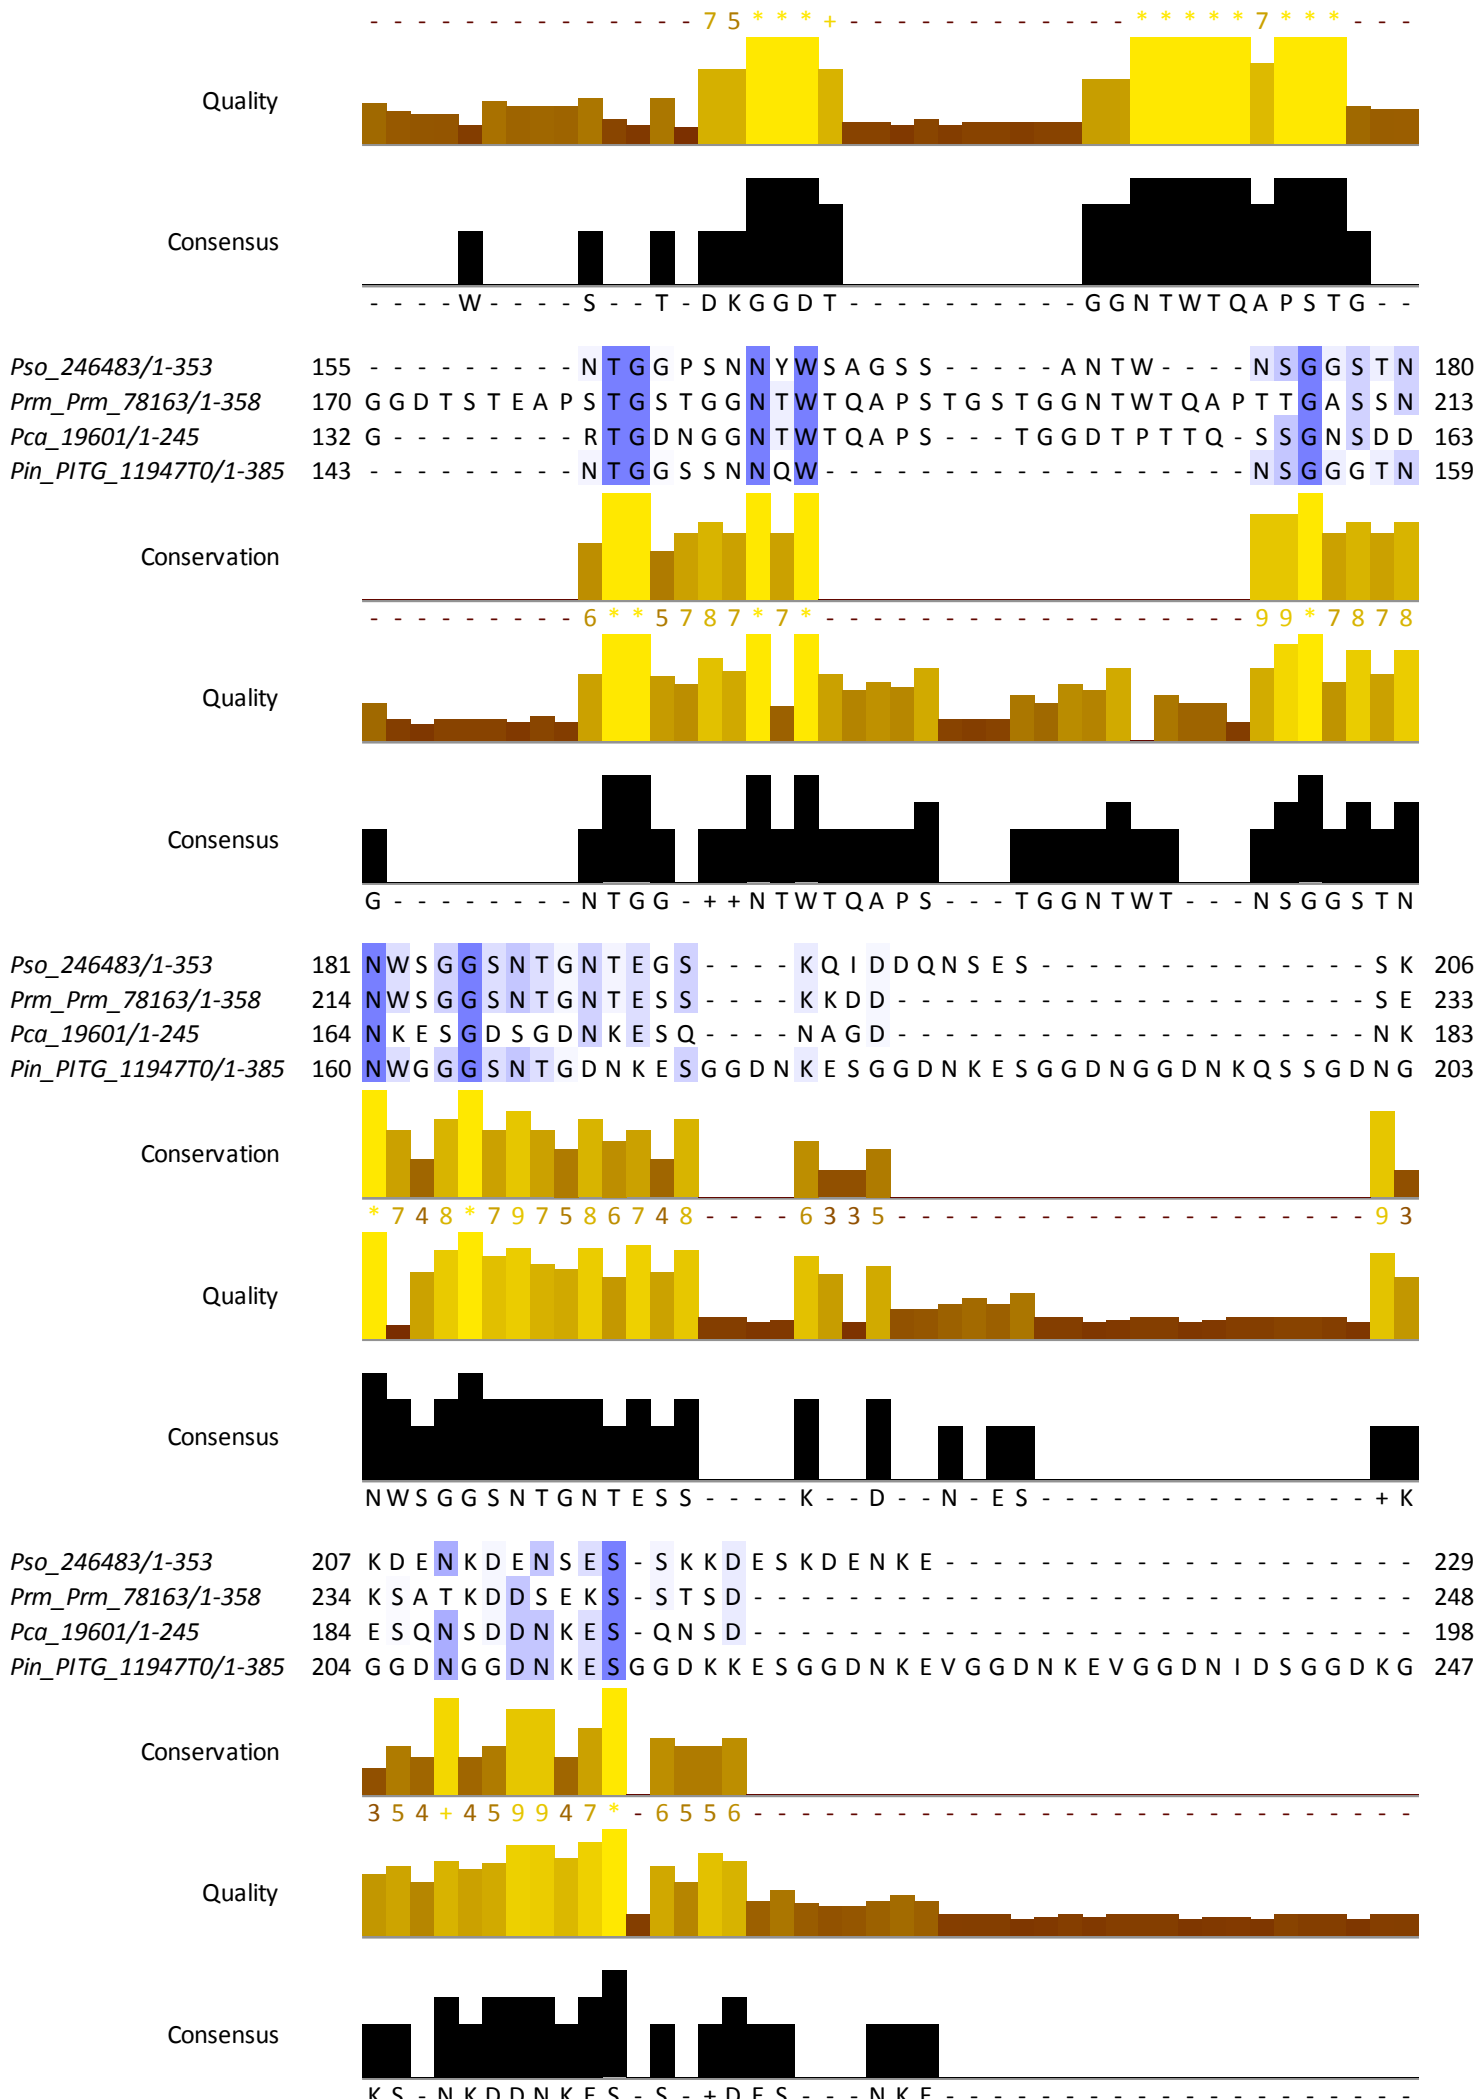

RSNRDDNRKESGSDLESNRK

|                               |     |                                                                                         |     |
|-------------------------------|-----|-----------------------------------------------------------------------------------------|-----|
| <i>Pso_246483/1-353</i>       | 230 | - E N K D D G G N T - - E N A A D T S V Q Q Q T Q G D I G G E - - - - -                 | 257 |
| <i>Prm_Prm_78163/1-358</i>    | 249 | - - - - - N T - - E S S A D S S V Q Q T A Q G S V G G E - - - - -                       | 269 |
| <i>Pca_19601/1-245</i>        | 199 | - - - - - D N - - K E S Q N S G D K K G S Q - - - - -                                   | 213 |
| <i>Pin_PITG_11947T0/1-385</i> | 248 | G D N K Q Q G G D N G G D N K K S G G D N K E S G G D N G G D K K E S G G E N T G D S V | 291 |

Conservation

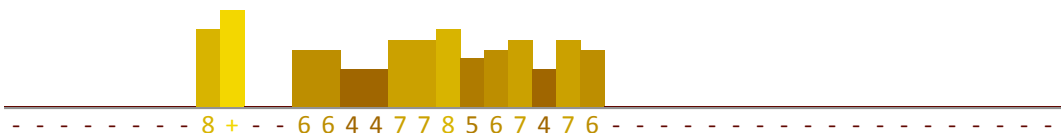

Quality

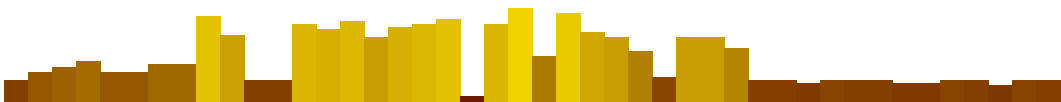

Consensus

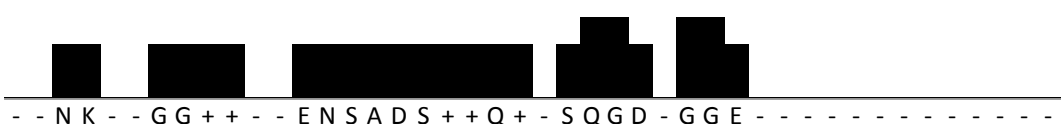

|                               |     |                                                                                         |     |
|-------------------------------|-----|-----------------------------------------------------------------------------------------|-----|
| <i>Pso_246483/1-353</i>       | 258 | S D P E V A G E A N P E I G G E A D S E C G S L A M A E D D S E C G S L Q M A E D D S E | 301 |
| <i>Prm_Prm_78163/1-358</i>    | 270 | A D P - - - - - S S E I A G E A D S E C G S L A M A E - D S E C G S L E M A E D G S E   | 306 |
| <i>Pca_19601/1-245</i>        |     | - - - - -                                                                               |     |
| <i>Pin_PITG_11947T0/1-385</i> | 292 | Q Q G E I G G E A - - E I G G E G D S E C G S L E M A E D D S E C G S L D M A E D D S E | 333 |

Conservation

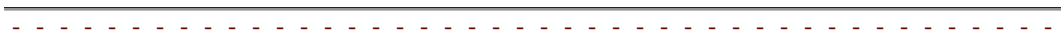

Quality

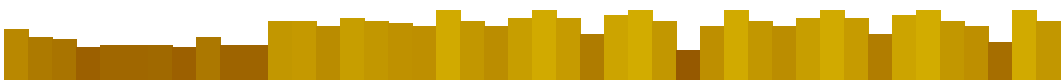

Consensus

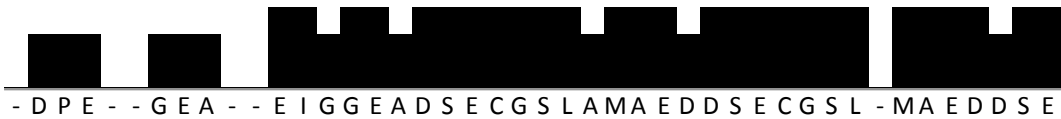

|                               |     |                                                                                         |     |
|-------------------------------|-----|-----------------------------------------------------------------------------------------|-----|
| <i>Pso_246483/1-353</i>       | 302 | C G S L E M A E D S E C G S L E M A E D N G D K Q D Y S G F K S N I D F S T F Q G T D A | 345 |
| <i>Prm_Prm_78163/1-358</i>    | 307 | C G S L E M A E D S E C G S L E M A E G S S D N Q E Y S G S K S D I T F S T F Q G T D T | 350 |
| <i>Pca_19601/1-245</i>        | 214 | - - - - - N S D D N K E Y T G S K S D I D F S T F Q G - D A                             | 237 |
| <i>Pin_PITG_11947T0/1-385</i> | 334 | C G S L E M A E P D N G G D - N G G N T G G D K G G D T G G D I G G D E G G N T G G D N | 376 |

Conservation

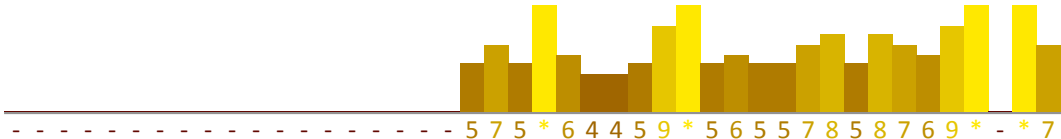

Quality

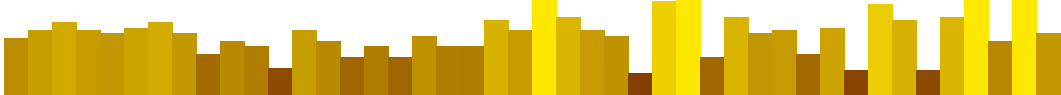

Consensus

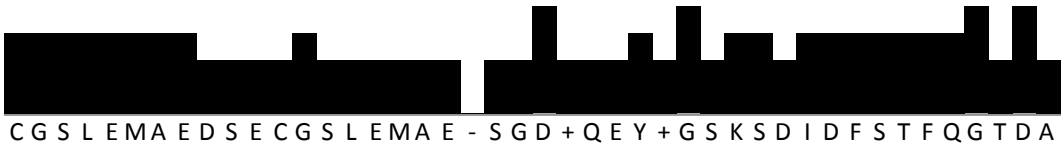

|                               |     |                   |     |
|-------------------------------|-----|-------------------|-----|
| <i>Pso_246483/1-353</i>       | 346 | N A G T V - S P Q | 353 |
| <i>Prm_Prm_78163/1-358</i>    | 351 | N A G T V - A P Q | 358 |
| <i>Pca_19601/1-245</i>        | 238 | N V G T V - A P Q | 245 |
| <i>Pin_PITG_11947T0/1-385</i> | 377 | G G N T E G S T G | 385 |

Conservation

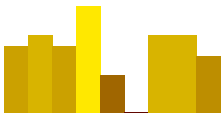

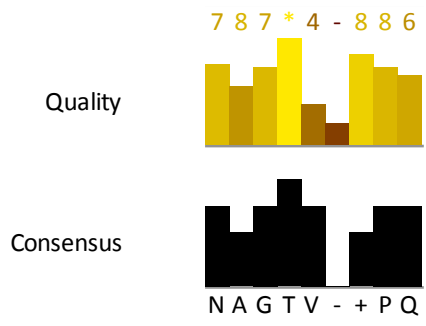

Ortholog 24

|                               |   |   |   |   |   |   |   |   |   |   |   |   |   |   |   |   |   |   |   |   |   |   |   |   |   |   |   |   |   |   |   |   |   |   |   |   |   |   |   |   |   |   |   |   |   |    |
|-------------------------------|---|---|---|---|---|---|---|---|---|---|---|---|---|---|---|---|---|---|---|---|---|---|---|---|---|---|---|---|---|---|---|---|---|---|---|---|---|---|---|---|---|---|---|---|---|----|
| <i>Prm_Prm_84933/1-299</i>    | 1 | M | L | R | L | V | - | L | L | A | A | S | C | V | L | A | T | Q | A | M | T | T | R | E | M | N | E | D | V | T | F | D | S | - | - | - | - | V | E | L | A | Q | - | G | R | 38 |
| <i>Pin_PITG_04668T0/1-293</i> | 1 | M | K | R | L | L | A | L | L | V | A | S | C | A | F | A | A | Q | A | M | E | T | L | E | M | S | D | D | V | T | F | D | S | - | - | - | - | V | V | F | S | G | E | S | R | 40 |
| <i>Pca_508923/1-300</i>       | 1 | M | M | R | L | L | A | L | L | V | A | S | C | A | L | A | T | Q | A | V | E | M | H | E | M | T | N | D | I | T | F | D | S | L | E | S | P | V | E | L | G | Q | E | G | R | 44 |
| <i>Pso_533029/1-301</i>       | 1 | M | R | F | L | A | L | V | V | A | A | T | C | V | L | S | T | Q | A | L | T | T | H | E | M | R | E | E | I | S | F | D | S | - | - | - | - | L | E | V | P | E | G | G | R | 40 |

Conservation

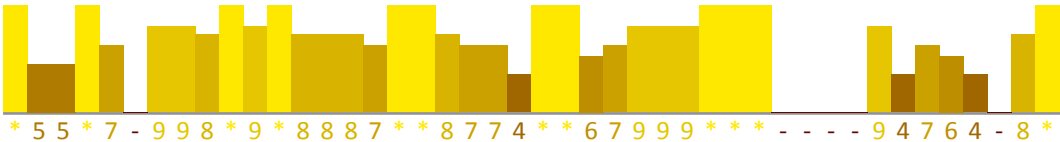

Quality

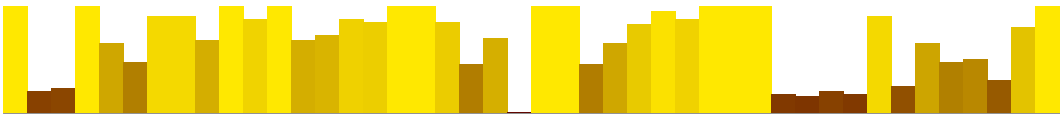

Consensus

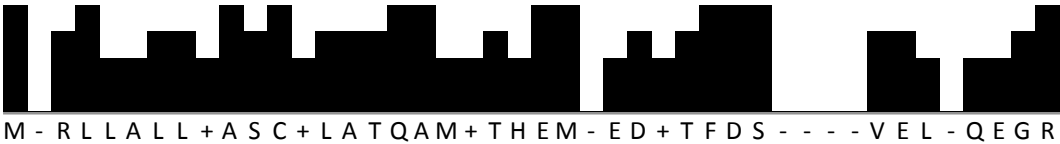

|                               |    |   |   |   |   |   |   |   |   |   |   |   |   |   |   |   |   |   |   |   |   |   |   |   |   |   |   |   |   |   |   |   |   |   |   |   |   |   |   |   |   |   |   |   |   |    |
|-------------------------------|----|---|---|---|---|---|---|---|---|---|---|---|---|---|---|---|---|---|---|---|---|---|---|---|---|---|---|---|---|---|---|---|---|---|---|---|---|---|---|---|---|---|---|---|---|----|
| <i>Prm_Prm_84933/1-299</i>    | 39 | K | L | A | G | A | T | V | D | T | T | L | W | A | E | G | Y | T | P | G | E | V | T | T | A | T | D | E | E | R | A | A | G | V | W | P | T | S | K | G | T | V | P | L | T | 82 |
| <i>Pin_PITG_04668T0/1-293</i> | 41 | K | L | A | - | - | - | V | D | T | T | T | F | P | E | D | Y | K | P | G | E | V | M | A | A | Q | D | E | E | R | A | A | G | V | W | P | T | S | K | G | M | V | P | L | T | 81 |
| <i>Pca_508923/1-300</i>       | 45 | K | L | A | G | A | Q | V | D | T | T | L | W | A | E | N | Y | S | P | G | E | V | T | T | A | Q | E | E | E | R | A | I | G | L | W | P | T | S | K | G | M | V | P | L | T | 88 |
| <i>Pso_533029/1-301</i>       | 41 | K | L | A | G | A | Q | V | D | T | T | L | W | A | E | N | Y | T | P | G | Q | V | M | A | A | E | D | E | E | R | A | V | G | V | W | P | T | S | K | G | T | V | P | L | T | 84 |

Conservation

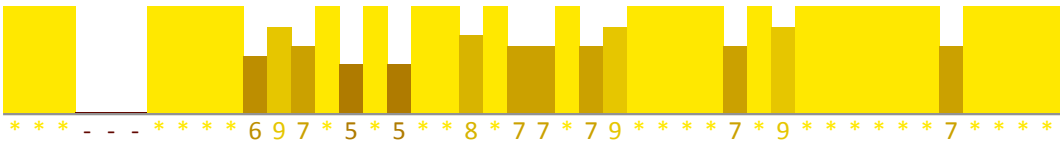

Quality

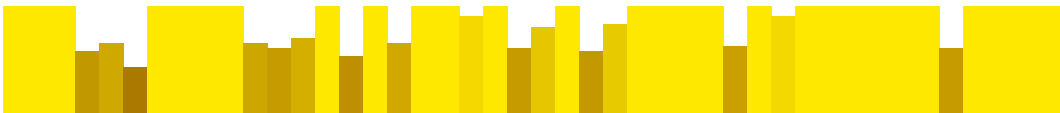

Consensus

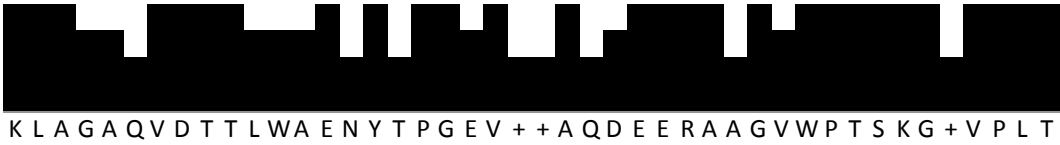

|                               |    |   |   |   |   |   |   |   |   |   |   |   |   |   |   |   |   |   |   |   |   |   |   |   |   |   |   |   |   |   |   |   |   |   |   |   |   |   |   |   |   |   |   |   |   |     |
|-------------------------------|----|---|---|---|---|---|---|---|---|---|---|---|---|---|---|---|---|---|---|---|---|---|---|---|---|---|---|---|---|---|---|---|---|---|---|---|---|---|---|---|---|---|---|---|---|-----|
| <i>Prm_Prm_84933/1-299</i>    | 83 | K | P | K | I | V | G | P | T | T | P | F | D | G | G | M | K | T | Y | K | R | S | N | V | A | F | K | S | G | A | K | M | A | K | S | S | A | V | F | V | V | Q | A | G | A | 126 |
| <i>Pin_PITG_04668T0/1-293</i> | 82 | R | P | R | T | V | G | P | S | T | P | F | D | G | G | M | K | T | F | K | R | S | N | V | A | F | R | S | G | A | K | M | T | R | A | N | A | V | F | V | V | Q | A | G | G | 125 |
| <i>Pca_508923/1-300</i>       | 89 | K | P | R | T | V | G | P | S | T | P | F | D | G | G | M | K | T | Y | K | R | S | N | V | A | F | K | S | G | A | K | M | T | R | A | N | A | V | F | V | V | Q | A | G | G | 132 |
| <i>Pso_533029/1-301</i>       | 85 | K | P | R | V | V | G | P | T | T | P | F | D | G | G | M | K | T | Y | K | R | S | N | V | A | F | K | S | G | A | K | M | T | R | A | N | A | V | F | V | V | Q | A | G | G | 128 |

Conservation

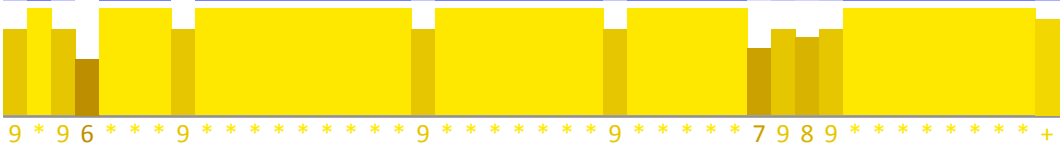

Quality

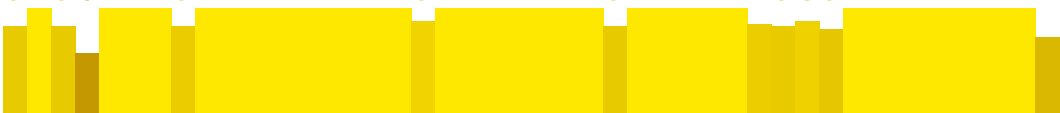

Consensus

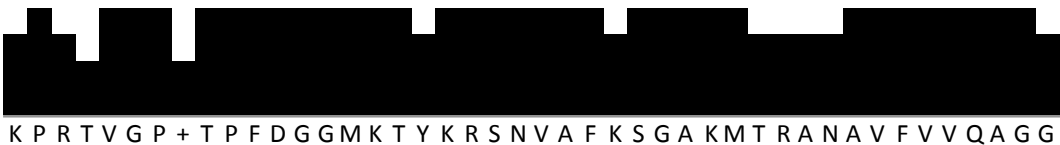

|                               |     |   |   |   |   |   |   |   |   |   |   |   |   |   |   |   |   |   |   |   |   |   |   |   |   |   |   |   |   |   |   |   |   |   |   |   |   |   |   |   |   |   |   |   |   |     |
|-------------------------------|-----|---|---|---|---|---|---|---|---|---|---|---|---|---|---|---|---|---|---|---|---|---|---|---|---|---|---|---|---|---|---|---|---|---|---|---|---|---|---|---|---|---|---|---|---|-----|
| <i>Prm_Prm_84933/1-299</i>    | 127 | T | L | S | N | V | I | I | A | G | G | G | G | V | Y | C | E | L | H | N | C | A | L | V | N | V | W | F | K | D | S | I | Q | S | G | L | H | I | N | S | G | T | G | I | T | 170 |
| <i>Pin_PITG_04668T0/1-293</i> | 126 | T | L | S | N | V | I | I | A | G | G | G | G | V | F | C | E | T | H | N | C | A | L | V | N | V | W | F | K | D | S | V | Q | G | A | L | H | V | N | S | G | T | G | I | T | 169 |
| <i>Pca_508923/1-300</i>       | 133 | T | L | S | N | V | I | I | A | G | G | G | G | V | F | C | E | T | H | N | C | A | L | V | N | V | W | F | K | D | S | V | Q | G | A | L | H | V | N | S | G | T | G | I | T | 176 |
| <i>Pso_533029/1-301</i>       | 129 | T | L | S | N | V | I | I | A | G | G | G | G | V | F | C | E | T | H | N | C | A | L | V | N | V | W | F | K | G | S | I | Q | S | A | L | H | V | N | S | G | T | G | I | T | 172 |

Conservation

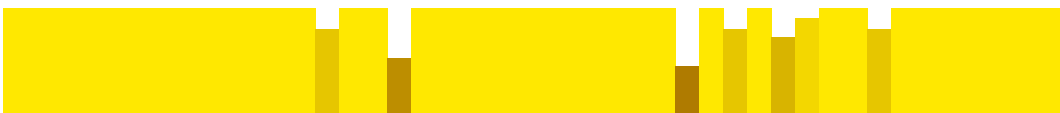

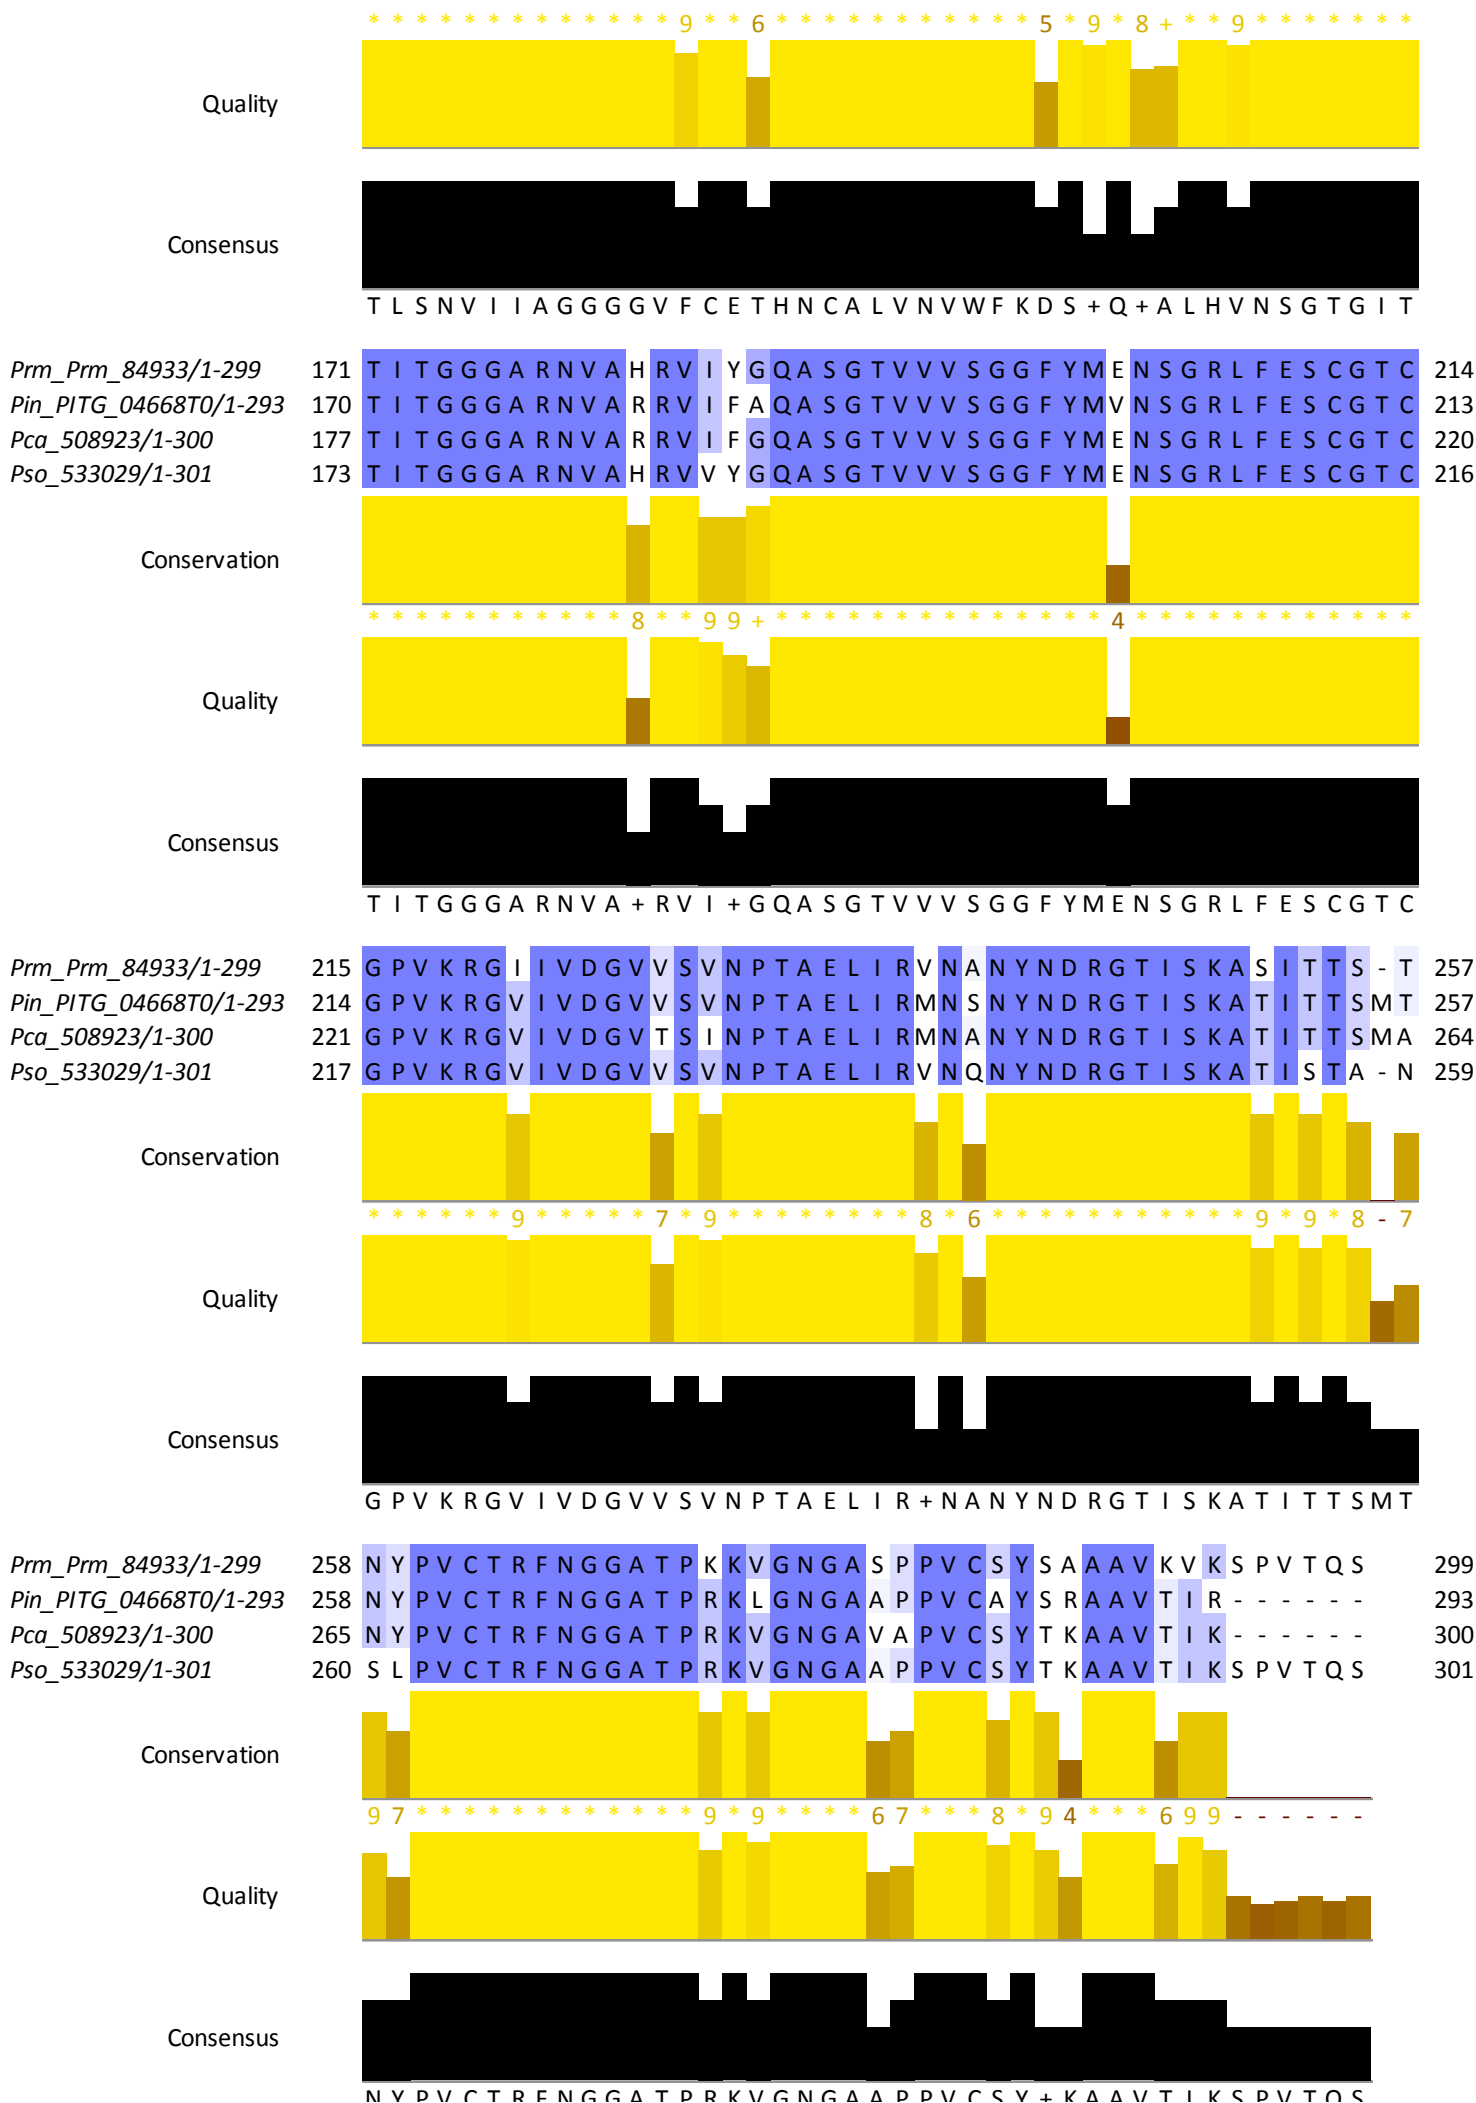



Ortholog 25

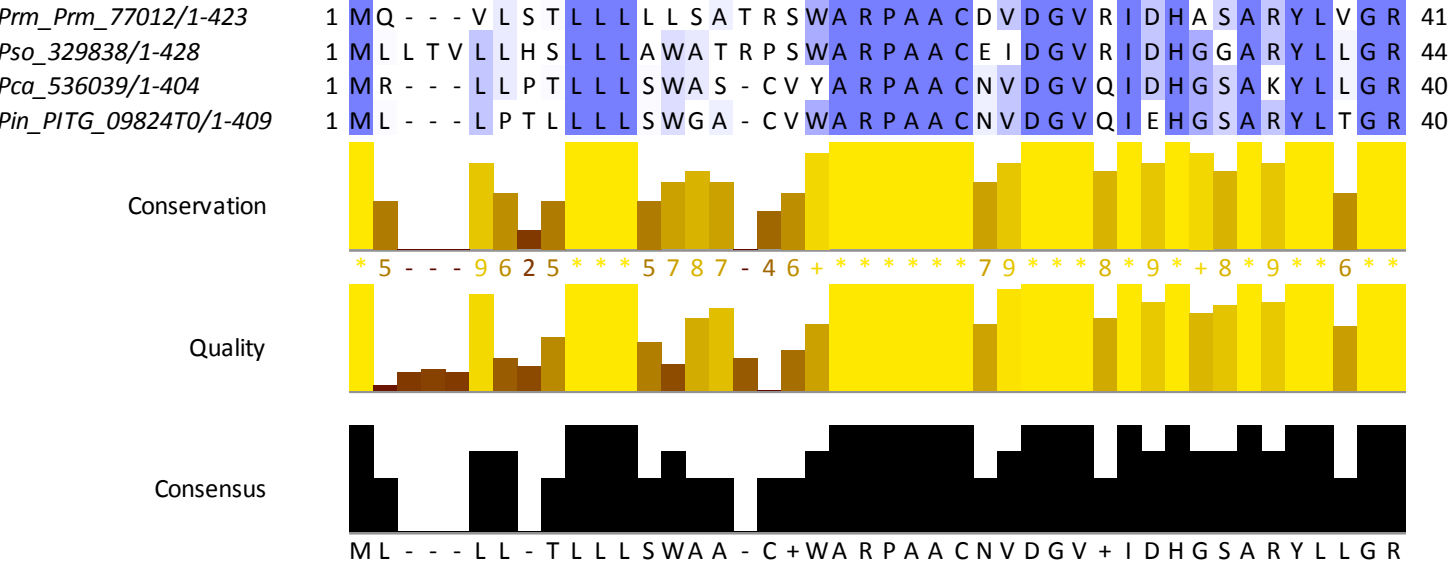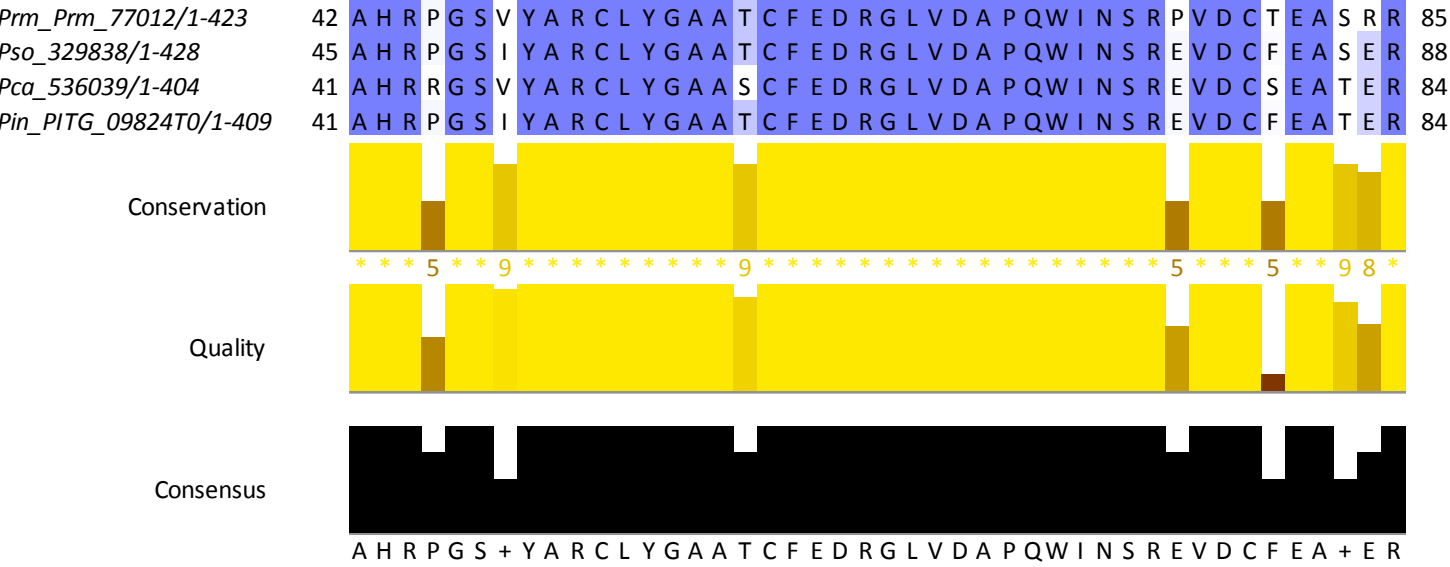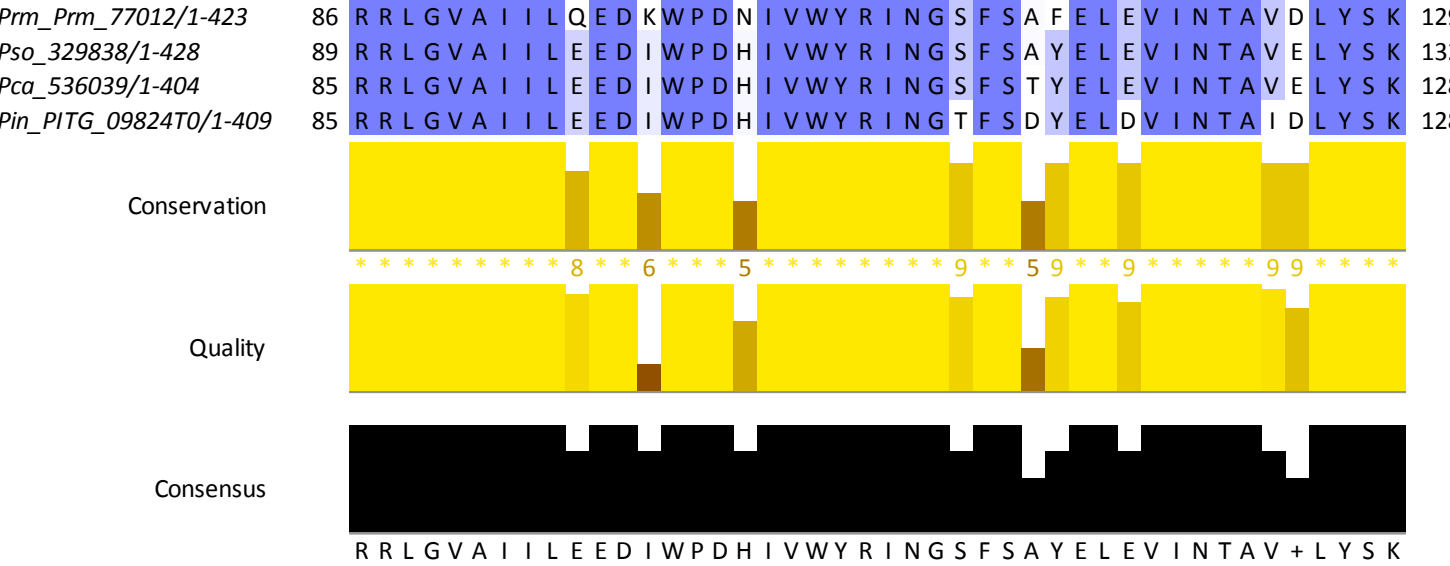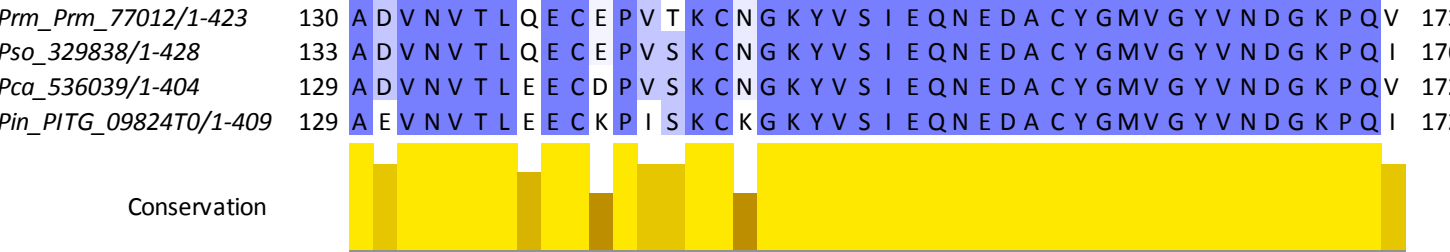

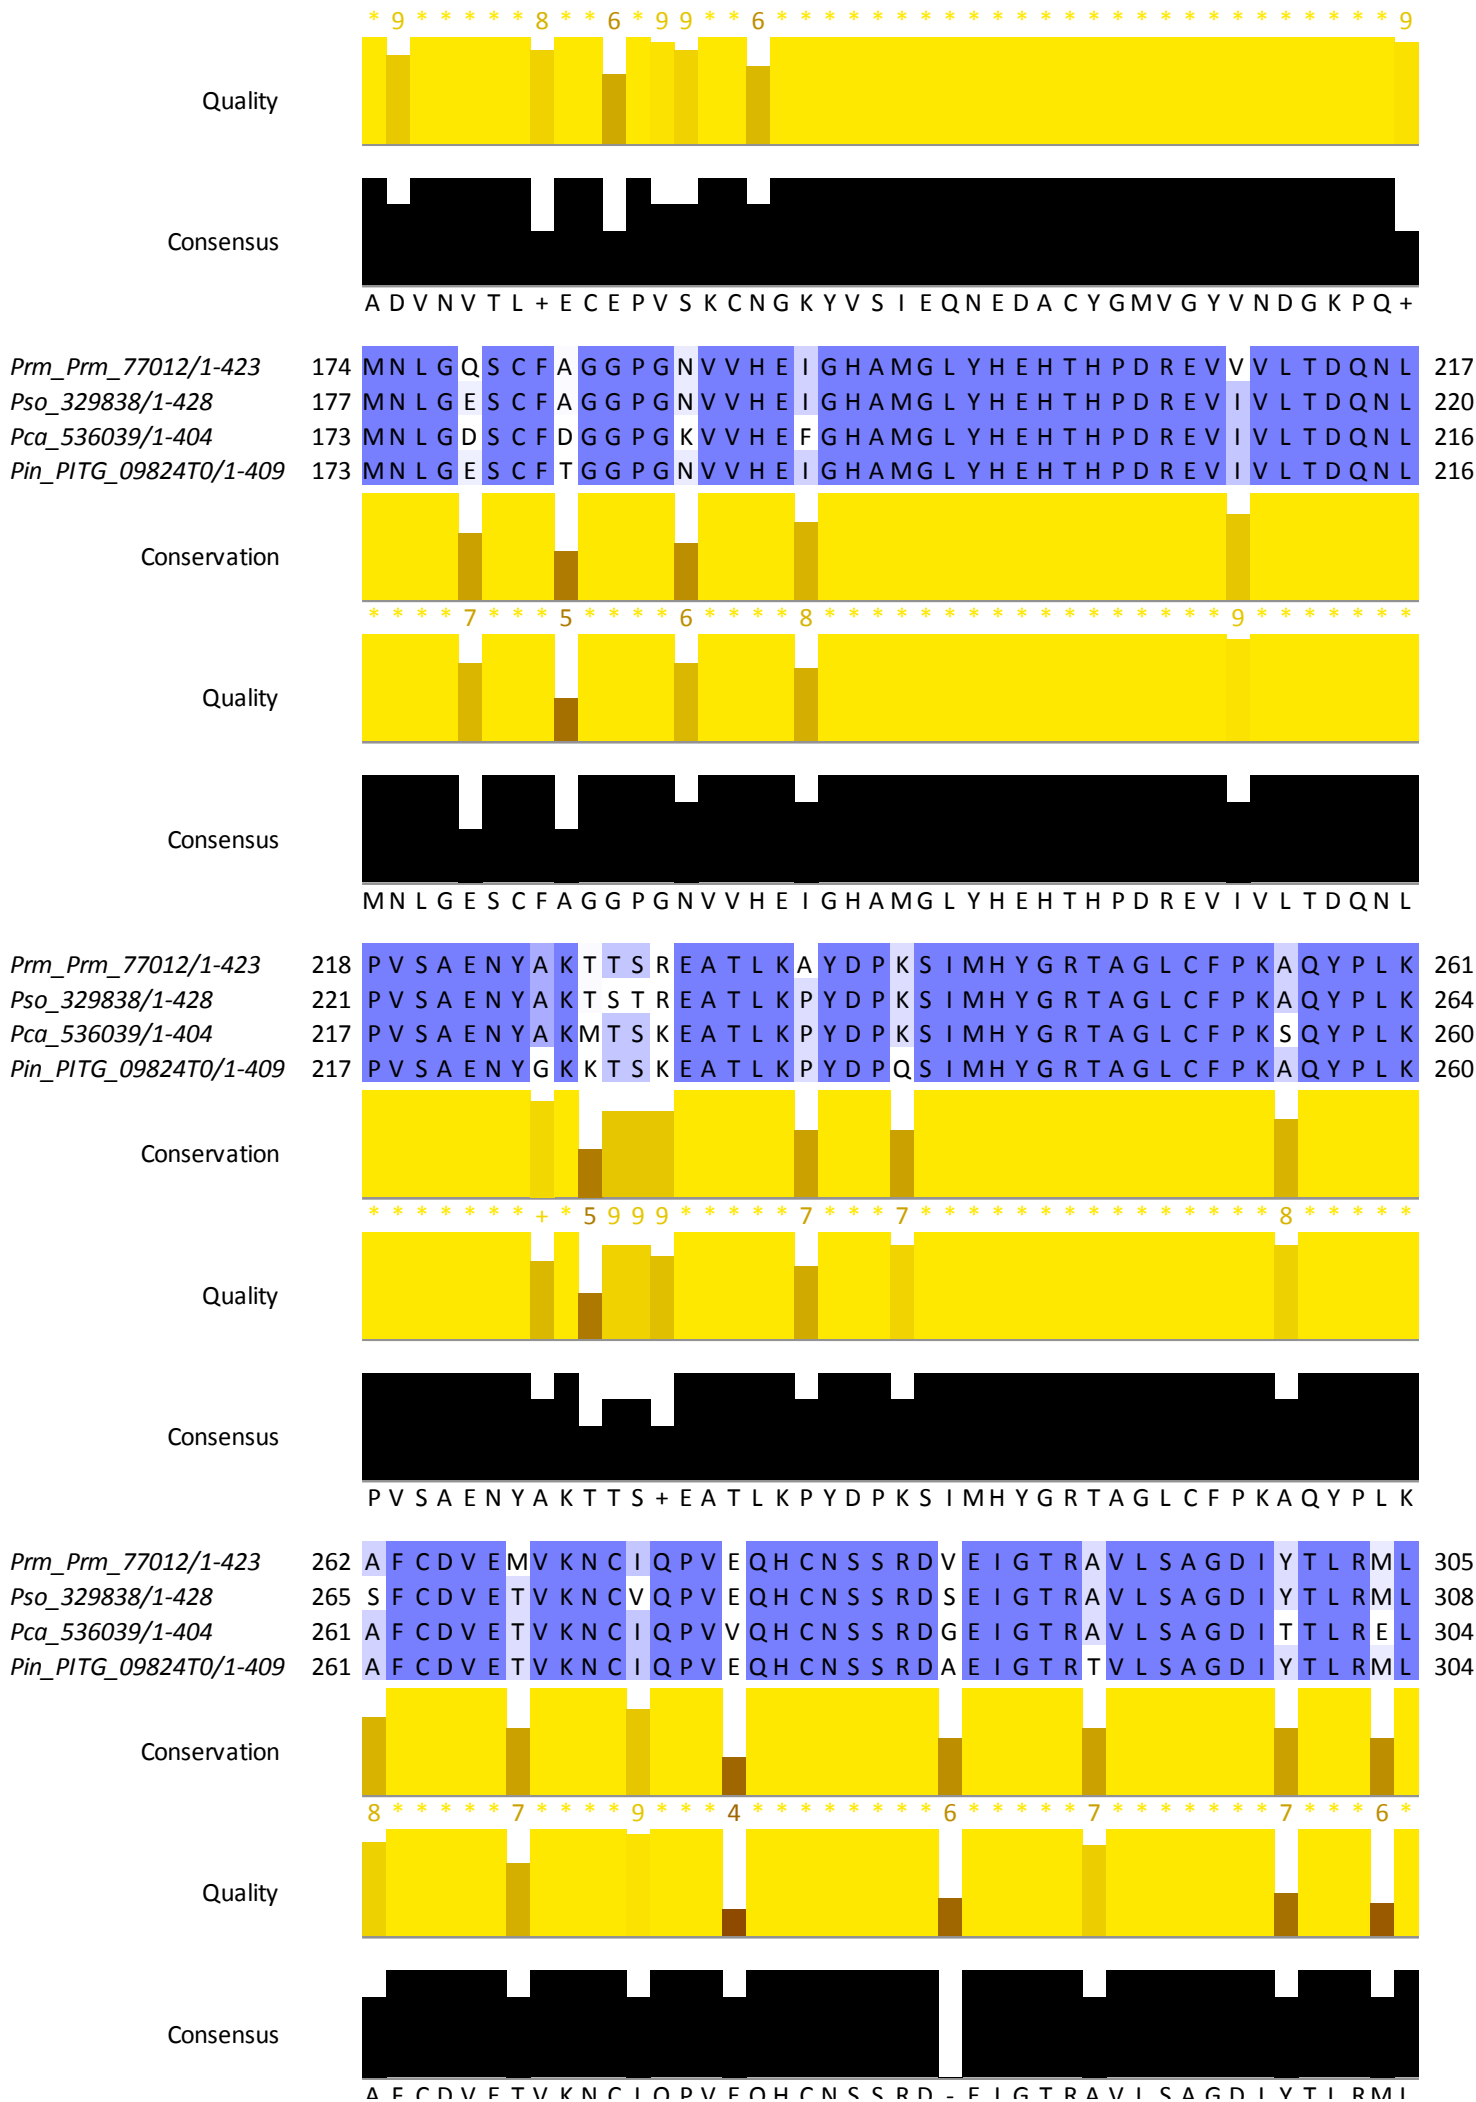

AT CLEVELAND INQUIRY CONCERNED LITIGATION SUBJECT TITLE

|                               |     |   |   |   |   |   |   |   |   |   |   |   |   |   |   |   |   |   |   |   |   |   |   |   |   |   |   |   |   |   |   |   |   |   |   |   |   |   |   |   |   |   |   |   |   |     |
|-------------------------------|-----|---|---|---|---|---|---|---|---|---|---|---|---|---|---|---|---|---|---|---|---|---|---|---|---|---|---|---|---|---|---|---|---|---|---|---|---|---|---|---|---|---|---|---|---|-----|
| <i>Prrm_Prm_77012/1-423</i>   | 306 | Y | G | S | K | D | N | A | T | V | R | D | V | K | I | P | T | V | A | S | S | T | A | G | S | V | G | A | P | D | S | I | S | D | M | I | K | H | T | S | K | P | S | T | S | 349 |
| <i>Pso_329838/1-428</i>       | 309 | Y | G | S | K | D | N | A | T | V | R | D | V | K | I | P | T | V | V | S | S | T | A | G | S | V | G | A | P | D | S | I | S | D | M | V | K | H | T | R | K | P | K | A | S | 352 |
| <i>Pca_536039/1-404</i>       | 305 | Y | G | P | K | D | N | A | V | V | K | D | V | K | I | P | T | V | V | S | S | T | A | G | S | V | G | S | P | D | S | I | S | D | T | V | K | H | T | S | K | P | K | K | T | 348 |
| <i>Pin_PITG_09824T0/1-409</i> | 305 | Y | G | S | K | D | N | A | T | V | R | D | V | K | I | P | T | V | K | S | S | A | A | G | S | V | G | S | P | D | S | L | T | D | V | V | K | R | T | T | S | K | S | K | K | 348 |

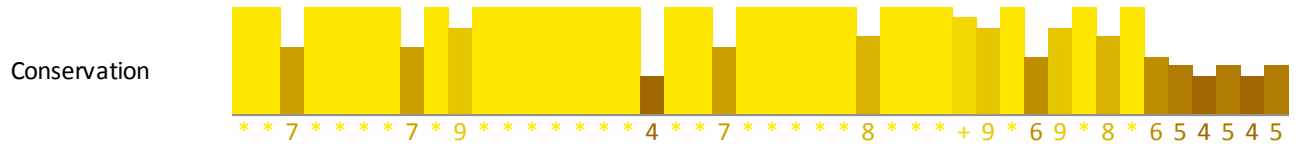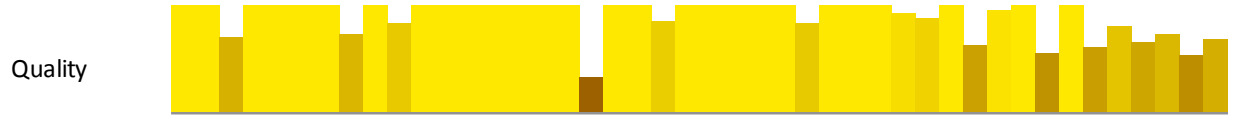

## Consensus

Y G S K D N A T V R D V K I P T V V S S T A G S V G + P D S I S D M V K H T S K P + K S

|                               |     |                                                                                         |     |
|-------------------------------|-----|-----------------------------------------------------------------------------------------|-----|
| <i>Prm_Prm_77012/1-423</i>    | 350 | N P S - T E V R S S A K Q G T - - - S A S K T S D S D Y K P G G V H G E G S S A D G S V | 389 |
| <i>Pso_329838/1-428</i>       | 353 | A A A - T E S R S A A K Q E T N S K S S L Q S V D P N Y K P G G V H A E S S - - - G S V | 392 |
| <i>Pca_536039/1-404</i>       | 349 | T T T L T E A R S L I K E - - - - - - - A D A T Y K P G G V H G E G N S R D G S V       | 382 |
| <i>Pin_PITG_09824T0/1-409</i> | 349 | A S T - T E A R S L D K R T S - - - - - V S T S D Y T P G D V H G E G S S K D G S V     | 384 |

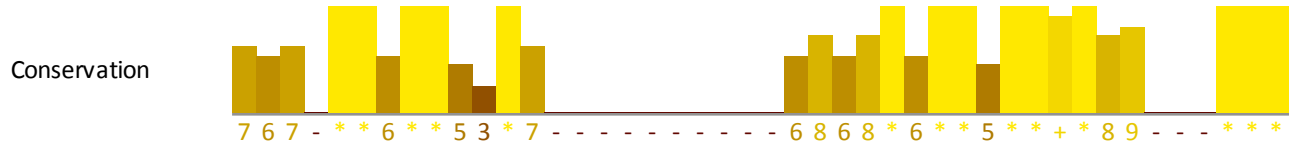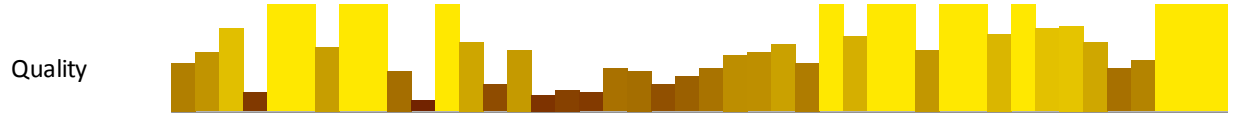

## Consensus

A - T - T E A R S L A K Q - T - - - S - - - - S D S D Y K P G G V H G E G S S - D G S V

|                               |     |                                                                         |     |
|-------------------------------|-----|-------------------------------------------------------------------------|-----|
| <i>Prm_Prm_77012/1-423</i>    | 390 | A E M L E W W E N L E N T I Q I Q N K K S S A L S K R S L T A E - - Q H | 423 |
| <i>Pso_329838/1-428</i>       | 393 | A E M L E W W E N L E N T I E I Q K K R A S T S S K R A L A E E Y T Q T | 428 |
| <i>Pca_536039/1-404</i>       | 383 | A E L M E W W E N L E N T I Q I Q K K K V A - - - - - - - - - -         | 404 |
| <i>Pin_PITG_09824T0/1-409</i> | 385 | A E L L E W W E N L E N T I Q I Q K K K T S A S N - - - - - - - - - -   | 409 |

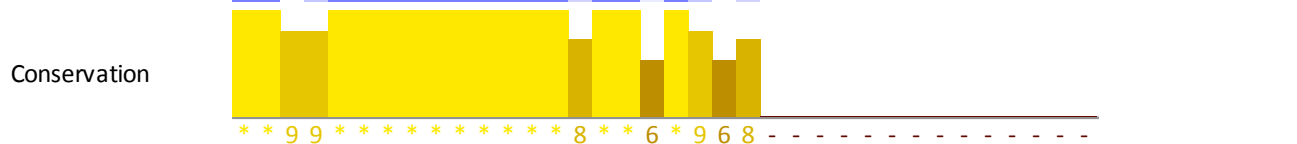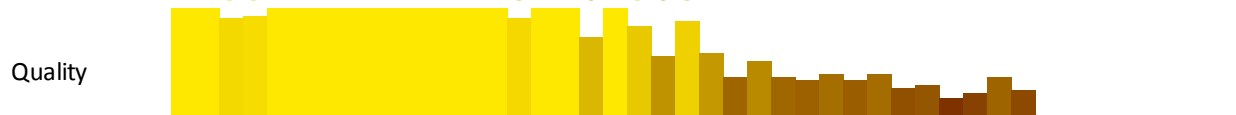

## Consensus

A E + L E W W E N L E N T I Q I Q K K K - S A S S K R - L - - E - - Q -

Ortholog 26

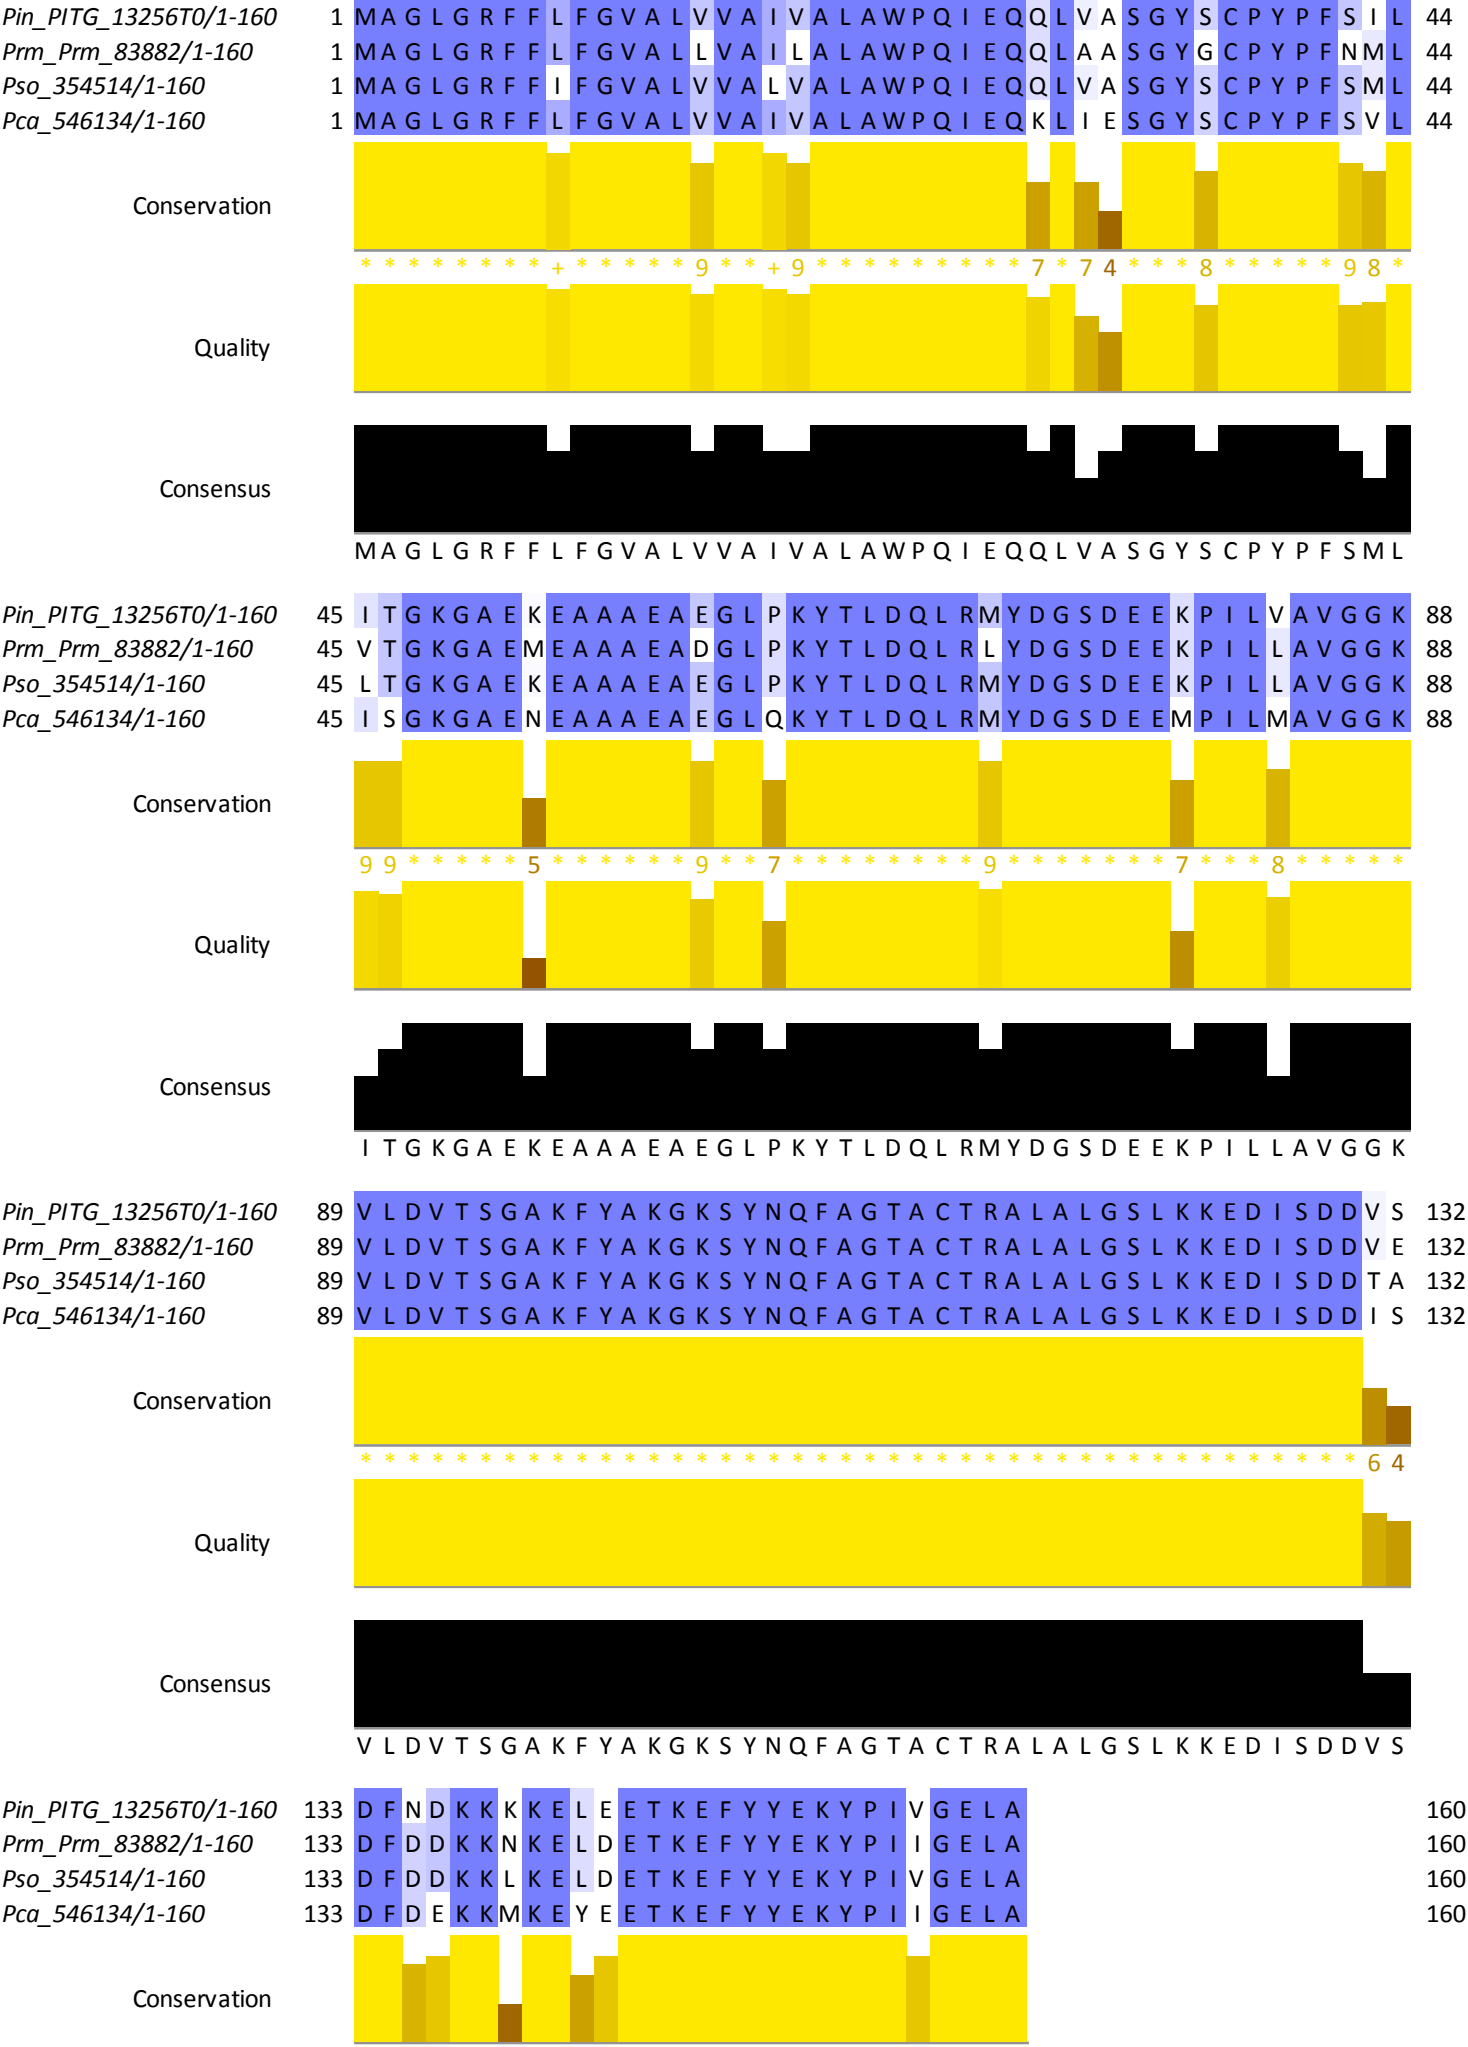

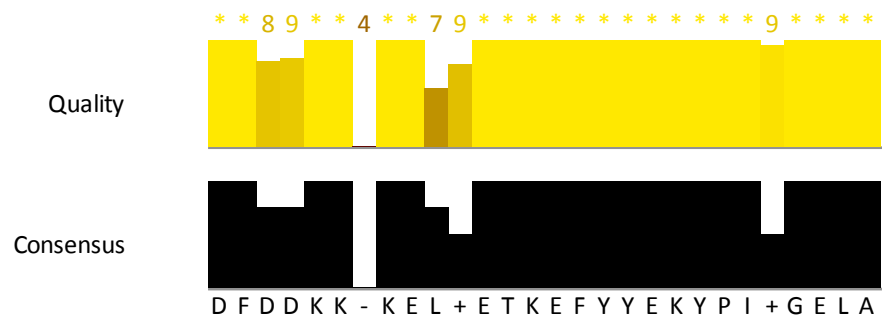

## Ortholog 27

| Accession                     | Sequence                                                                               | Length |
|-------------------------------|----------------------------------------------------------------------------------------|--------|
| <i>Pso_520326/1-365</i>       | 1 MTRGFR--L L L A L A C F V A L A A A G K D Y Y E V L G V S R D A S S A E I K R        | 41     |
| <i>Prm_Prm_76705/1-354</i>    | 1 MTRV - R R L L L L L A L V C I V A L A A A G R D Y Y E V L G V A R D A S T A E I K R | 43     |
| <i>Pca_558196/1-369</i>       | 1 MTRGGRH L L L L L A L A A L V A L A V A G K D Y Y E V L G V A R D A S S A E I K R    | 44     |
| <i>Pin_PITG_13007T0/1-368</i> | 1 MTRG - R H L L V L L A L A C L V A L S V A G K D Y Y E V L G V S R D A S S A E I K R | 43     |

  

| Conservation                                                                        | Quality | Consensus                                                                               |
|-------------------------------------------------------------------------------------|---------|-----------------------------------------------------------------------------------------|
|                                                                                     |         |                                                                                         |
| * * * 8 - * - - - 9 * * * * 8 9 8 * * * 8 8 * * 9 * * * * * * * 8 * * * * 9 * * * * |         | M T R G - R H L L L L L A L A C L V A L A + A G K D Y Y E V L G V + R D A S S A E I K R |

| Accession                     | Length | Sequence                                                                                | Start | End |
|-------------------------------|--------|-----------------------------------------------------------------------------------------|-------|-----|
| <i>Pso_520326/1-365</i>       | 42     | A F R K L S L K H H P D K N P G D E N A A K K F A E V A S A Y D V L S D E E K K A K Y D | 85    |     |
| <i>Prm_Prm_76705/1-354</i>    | 44     | A F R K L S L K H H P D K N P G D E S A A Q K F A E V A G A Y D V L S D E E K K T K Y D | 87    |     |
| <i>Pca_558196/1-369</i>       | 45     | A F R K L S L K H H P D K N P G D E S A A Q K F A E V A S A Y D V L S D E E K K S K Y D | 88    |     |
| <i>Pin_PITG_13007T0/1-368</i> | 44     | A F R K L S L K H H P D K N P G D E S A A Q K F A E V A G A Y D V L S D E D K R N K Y D | 87    |     |

  

| Conservation                                                              | Quality | Consensus                                                                               |
|---------------------------------------------------------------------------|---------|-----------------------------------------------------------------------------------------|
|                                                                           |         |                                                                                         |
| * * * * * * * * * * * * * * 9 * * 7 * * * * * 8 * * * * * 9 9 * 9 7 * * * |         | A F R K L S L K H H P D K N P G D E S A A Q K F A E V A + A Y D V L S D E E K K - K Y D |

| Accession                     | Length | Sequence                                                                                  | Conservation | Quality | Consensus |
|-------------------------------|--------|-------------------------------------------------------------------------------------------|--------------|---------|-----------|
| <i>Pso_520326/1-365</i>       | 86     | R Y G E E G L S N S G G G G G H D P F D I F S Q F F - G G G R Q R R R E R E P S R G P D V | 128          |         |           |
| <i>Prm_Prm_76705/1-354</i>    | 88     | R Y G E E G L A N A G G G G G H D P F D I F S Q F F - G G G R Q R R R E H E P S R G P D V | 130          |         |           |
| <i>Pca_558196/1-369</i>       | 89     | R Y G E E G L N N A G G G G G H D P F D I F S Q F F G G G R Q R R R E R E P S R G P D V   | 132          |         |           |
| <i>Pin_PITG_13007T0/1-368</i> | 88     | R Y G E E G L N N A G G D G G H D P F D I F S Q F F G G G G R N R R R E R E P S R G P D V | 131          |         |           |
| Conservation                  |        | * * * * * 7 * 8 * * 5 * * * * * * * * * * - * * * * 9 * * * 8 * * * * * *                 |              |         |           |
| Quality                       |        |                                                                                           |              |         |           |
| Consensus                     |        | R Y G E E G L N N A G G G G G H D P F D I F S Q F F G G G G R Q R R R E R E P S R G P D V |              |         |           |

|                               |     |   |   |   |   |   |   |   |   |   |   |   |   |   |   |   |   |   |   |   |   |   |   |   |   |   |   |   |   |   |   |   |   |   |   |   |   |   |   |   |   |   |   |   |   |     |
|-------------------------------|-----|---|---|---|---|---|---|---|---|---|---|---|---|---|---|---|---|---|---|---|---|---|---|---|---|---|---|---|---|---|---|---|---|---|---|---|---|---|---|---|---|---|---|---|---|-----|
| <i>Pso_520326/1-365</i>       | 129 | V | M | P | L | R | V | S | L | A | D | L | Y | N | G | K | S | L | Q | F | S | I | R | R | E | T | I | C | H | H | C | H | G | K | G | A | A | H | E | D | D | V | H | V | C | 172 |
| <i>Prm_Prm_76705/1-354</i>    | 131 | V | M | P | L | R | V | S | L | A | D | L | Y | N | G | K | S | L | Q | F | S | I | R | - | - | - | - | - | - | - | - | - | - | - | - | - | P | H | D | E | D | I | H | V | C | 161 |
| <i>Pca_558196/1-369</i>       | 133 | V | M | P | L | R | V | S | L | A | D | L | Y | N | G | K | S | L | Q | F | S | I | R | R | E | T | I | C | H | H | C | H | G | K | G | A | A | H | E | E | D | V | H | V | C | 176 |
| <i>Pin_PITG_13007T0/1-368</i> | 132 | V | M | P | L | R | V | S | L | A | H | L | Y | N | G | K | S | L | Q | F | S | I | R | R | E | T | I | C | H | H | C | H | G | K | G | A | A | H | E | E | D | V | H | V | C | 175 |
| Conservation                  |     |   |   |   |   |   |   |   |   |   |   |   |   |   |   |   |   |   |   |   |   |   |   |   |   |   |   |   |   |   |   |   |   |   |   |   |   |   |   |   |   |   |   |   |   |     |

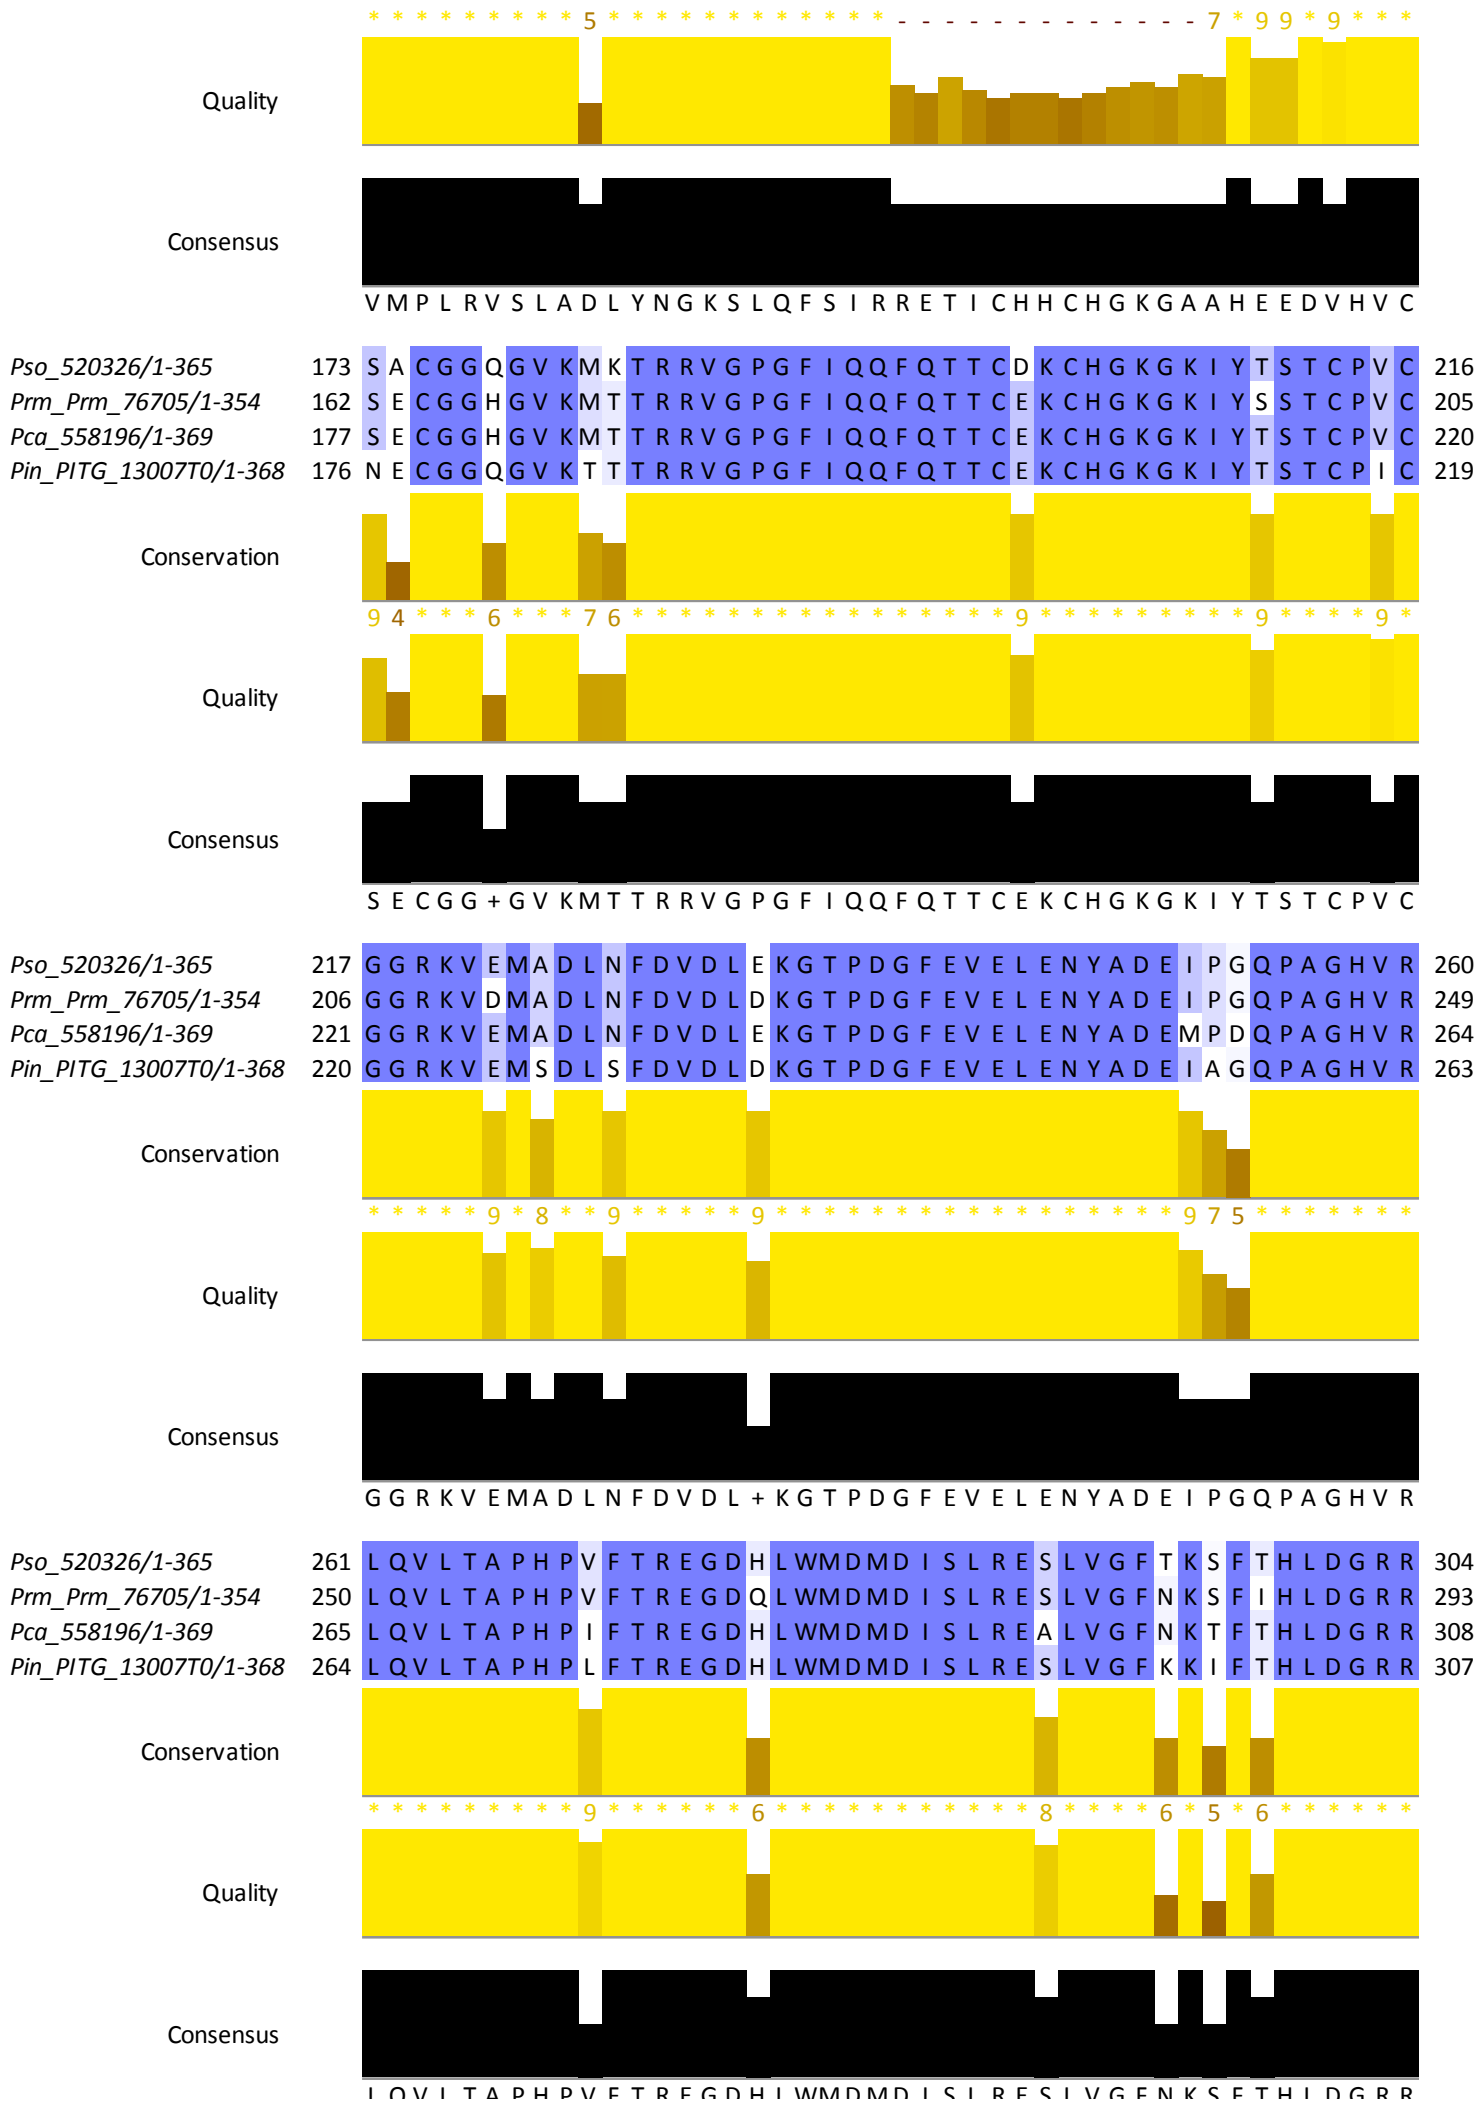

|   |   |   |   |   |   |   |   |   |   |   |   |   |   |   |   |   |   |   |   |   |   |   |   |   |   |   |   |   |   |   |   |   |   |   |   |   |   |   |   |   |   |   |     |     |
|---|---|---|---|---|---|---|---|---|---|---|---|---|---|---|---|---|---|---|---|---|---|---|---|---|---|---|---|---|---|---|---|---|---|---|---|---|---|---|---|---|---|---|-----|-----|
| V | E | V | V | R | D | E | V | T | P | P | R | F | V | T | V | L | K | D | E | G | M | P | K | Q | H | F | P | S | E | R | G | Q | L | H | I | K | F | H | V | Q | F | P | E   | 348 |
| V | E | M | V | R | D | G | I | T | P | P | R | F | V | T | V | L | K | D | E | G | M | P | K | Q | H | F | P | S | E | R | G | Q | L | H | I | K | F | H | V | Q | F | P | E   | 337 |
| V | D | V | V | R | D | E | I | T | P | P | R | F | V | T | V | L | K | D | E | G | M | P | K | Q | H | T | P | S | E | K | G | Q | L | H | I | K | F | H | V | Q | F | P | A   | 352 |
| V | E | V | V | R | E | D | I | T | P | P | R | F | V | T | V | L | K | D | E | G | M | P | K | Q | H | S | S | E | R | G | Q | L | H | I | K | F | H | V | K | F | P | E | 351 |     |

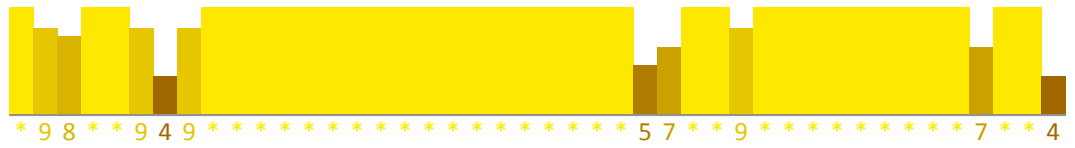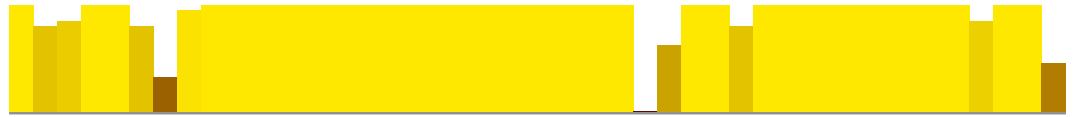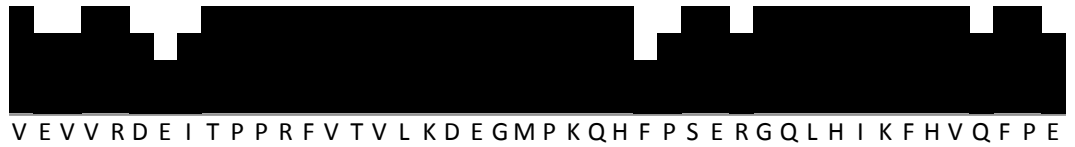

|   |   |   |   |   |   |   |   |   |   |   |   |   |   |   |   |   |     |
|---|---|---|---|---|---|---|---|---|---|---|---|---|---|---|---|---|-----|
| T | L | S | D | E | Q | K | V | G | F | R | E | L | F | S | M | K | 365 |
| S | L | S | D | E | Q | K | V | G | F | R | E | L | F | S | M | K | 354 |
| S | L | S | D | E | Q | K | V | G | F | R | E | L | F | S | M | K | 369 |
| S | L | S | D | E | Q | K | T | G | F | R | E | L | F | S | M | K | 368 |

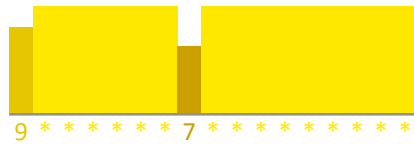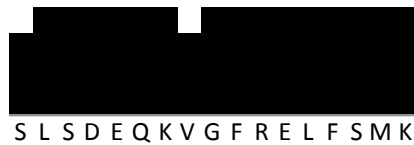

Ortholog 28

Pin\_PITG\_15142T0/1-490

Pso\_286249/1-489

Pca\_129113/1-478

Prm\_Prm\_85377/1-491

1

M - L H L K T R L L L L A A I S L S T S C L A K Y S M V T P N P L S S I D S H H I S T K

43

1

M R L H Q L V - - - - A V A S A L L L L V Q S A T A E V T S N - - - G K L R T D T A V Q

37

1

M H L Q I A L - - - - F L V V V S L L V N V E A V P A K A Q S D - - S V V S F R H I G - -

37

1

M R F H H A T - - - - L L F A V T L L V Y C E V A S A A V N S Q - - T T Q V R Q E V S T A

39

Conservation

Quality

Consensus

Pin\_PITG\_15142T0/1-490

Pso\_286249/1-489

Pca\_129113/1-478

Prm\_Prm\_85377/1-491

44

R L L R A G K T S Y Y D L D E E R - G V S G V S V E S L S N S L K S T T - - N E Q L M S

84

38

G G L R A H R A T - - T D E E E R - A L P V S G L E T L S S T L K S T T T I D D E L K A

78

38

R L L R - - - - - D E R E E R - G V S A N A V E T I T D A V E S K I N - T A Q L K S

72

40

R L L R V R K S S - - S E D E E R G G I S T A G V E A L I S S L K S T V S - S E Q L S T

80

Conservation

Quality

Consensus

Pin\_PITG\_15142T0/1-490

Pso\_286249/1-489

Pca\_129113/1-478

Prm\_Prm\_85377/1-491

85

W L N G G K N A D D V F K L L T L D D A A E T L L A S P Q L Q A W I K F M K K F N T E N

128

79

L L A K G E S A D D V F K R L A L N K A A G G L L S N P K L Q Q W I D Y M K L A N K Q N

122

73

W L E S G E S A D D V F K L L K L D S A A D K V L G H A K L D E W I E Y M K L F N G Q K

116

81

L A K K S E S T D D V F K L L T V D R K A D D L L G S V Q L D D W I T Y K N I F N K E N

124

Conservation

Quality

Consensus

Pin\_PITG\_15142T0/1-490

Pso\_286249/1-489

Pca\_129113/1-478

Prm\_Prm\_85377/1-491

129

P K Q Q T T L I K T L T S H Y G D D G V A K I I E A A K Q V P A - - T A T I A K R L Q T

170

123

P K K Q T S L I S T L T A H Y G D D G L A K I I E S A K L V P D - - T G T F A K R L Q T

164

117

G S K K T T L I K T L T A H F E D D G V A R M I Q K A L Q V D S - - T A K M A K R L Q F

158

125

R K H Q T S L I S T L L A H Y D D E A V A K M I A A A K A A P S T G T A T M A K N L Q I

168

Conservation

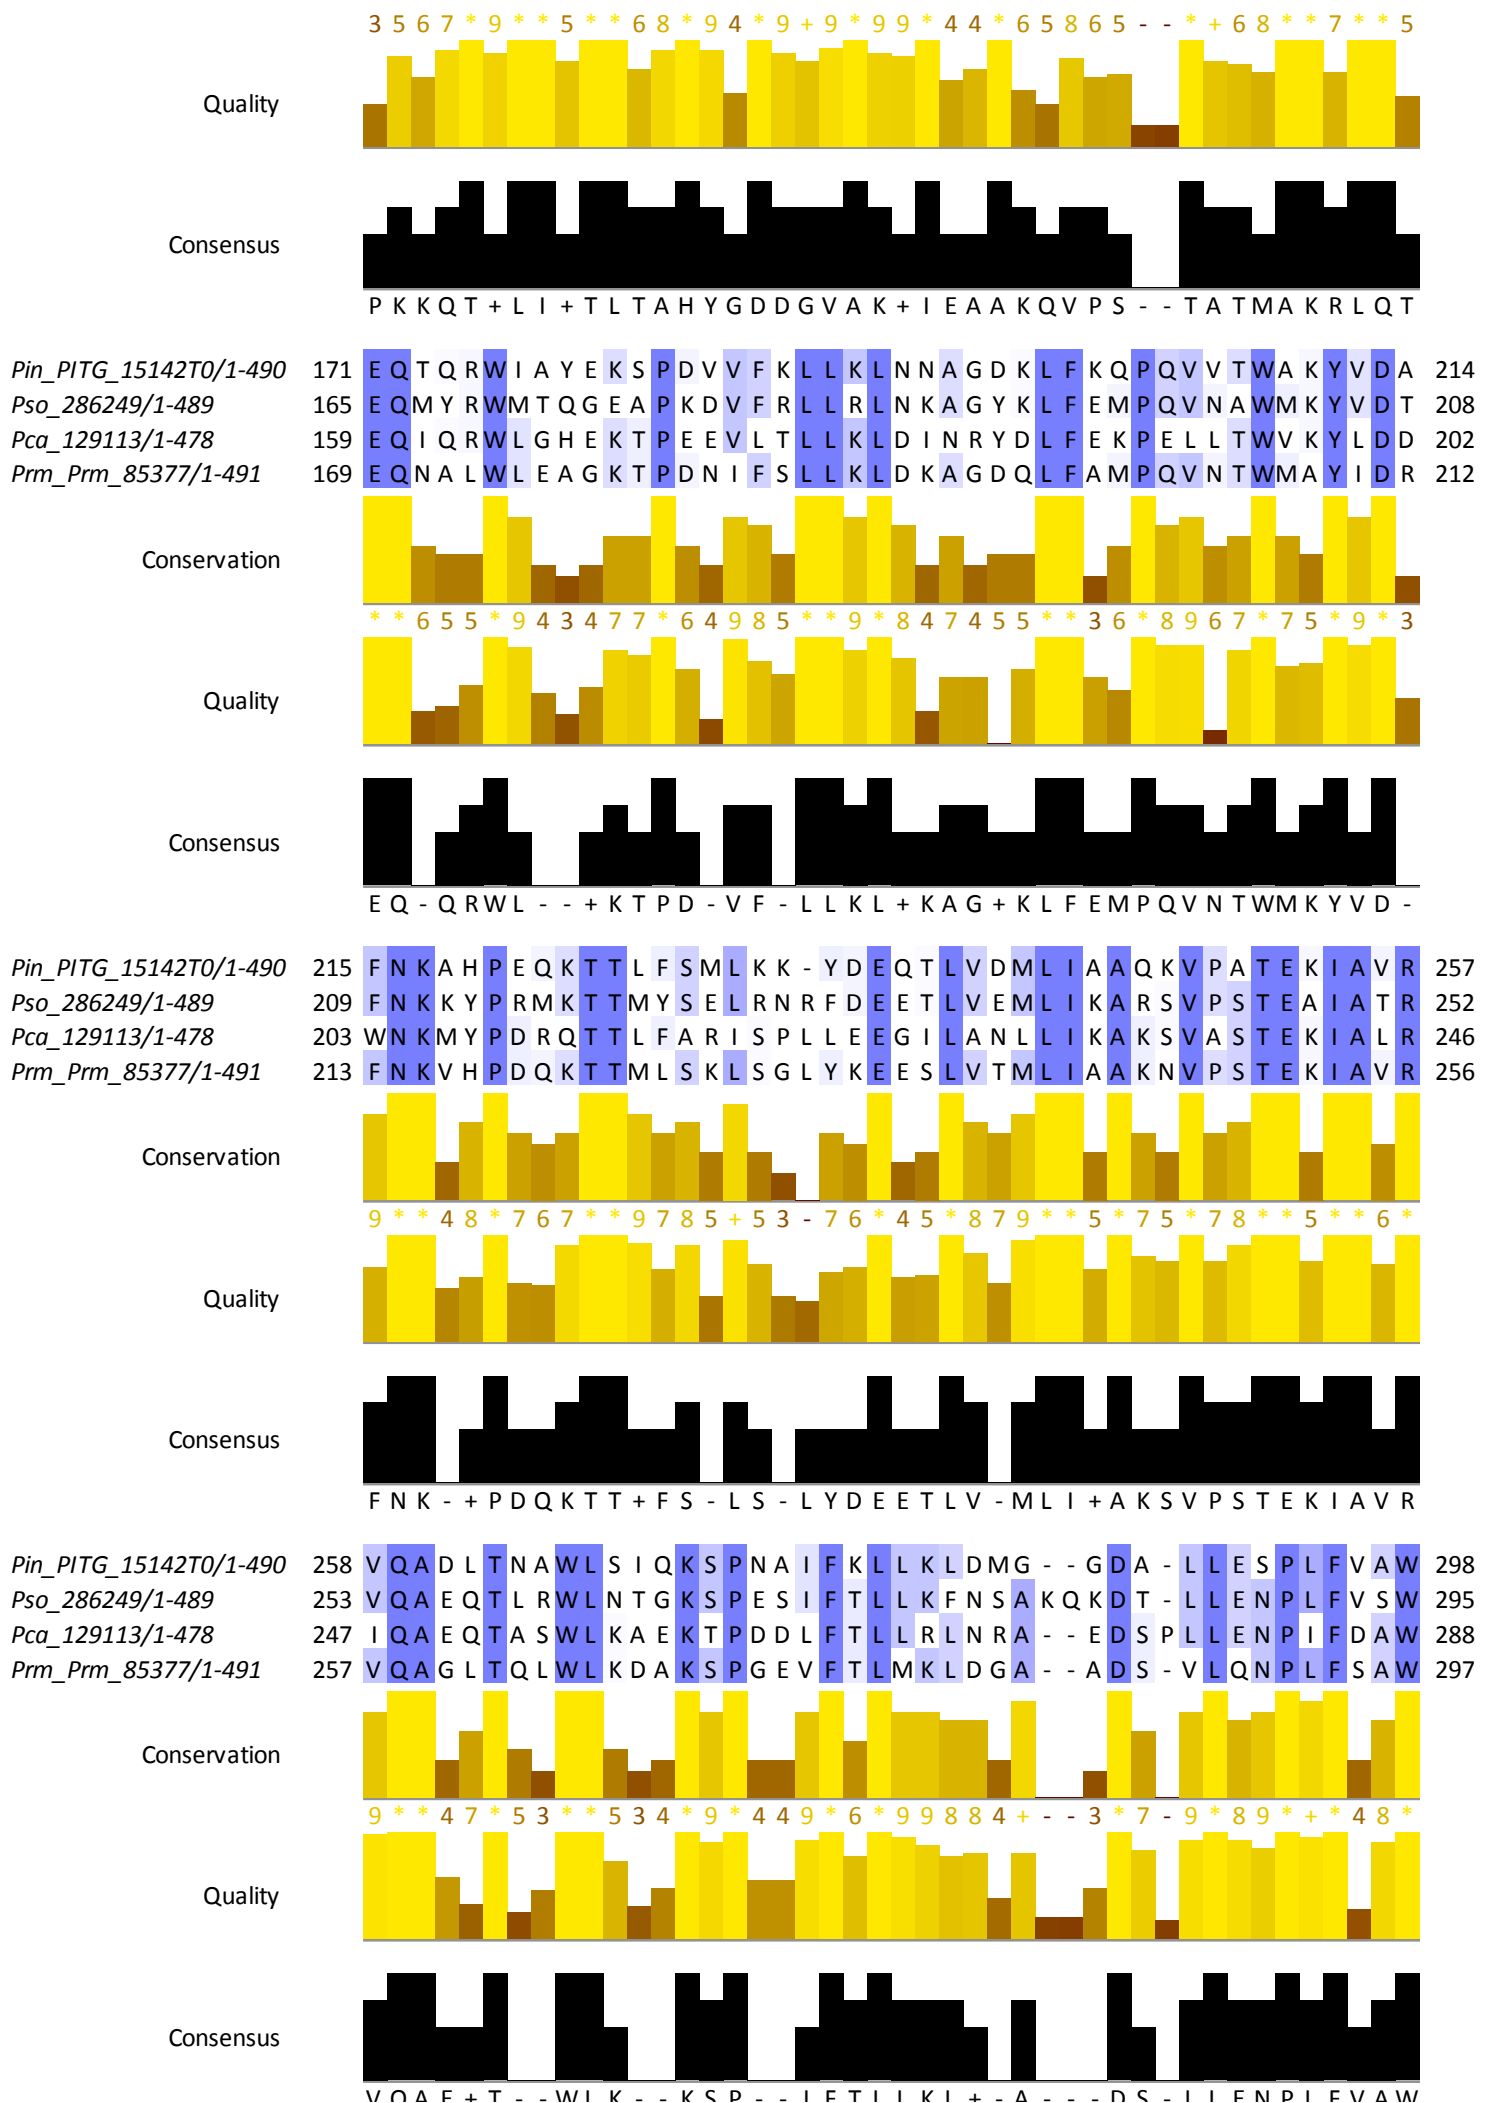

Pin\_PITG\_15142T0/1-490 299 T K Y T D Y Y N L M Y H K E T F P V I S T L T K N Y P N D K L A S I L A L A S M N P S T 342  
Pso\_286249/1-489 296 L K Y T D D F N E R Y P R R E D L A V T S M L E H F S S D T L A K M V V D G S K S P S I 339  
Pca\_129113/1-478 289 V K Y A D D F R E M Y P K V S F D P I A T I S E H Y T A A Q V A T M I V E A S K S P S T 332  
Prm\_Prm\_85377/1-491 298 T K Y V D D F N L N H P K K E M K A I Y T L V D H Y S T A A L T K M I L D A K K V P R T 341

Conservation

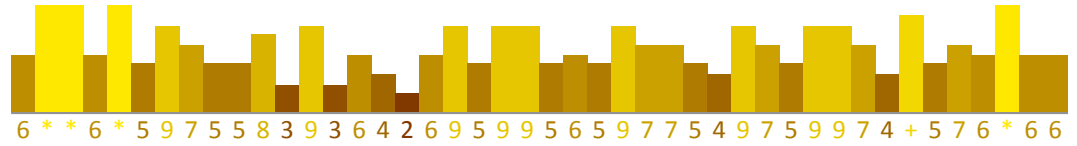

Quality

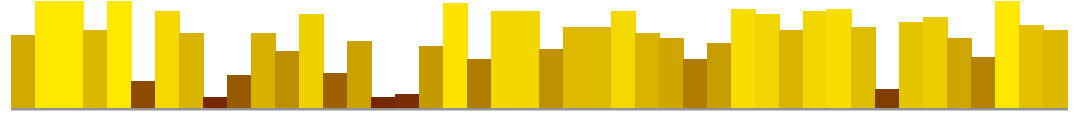

Consensus

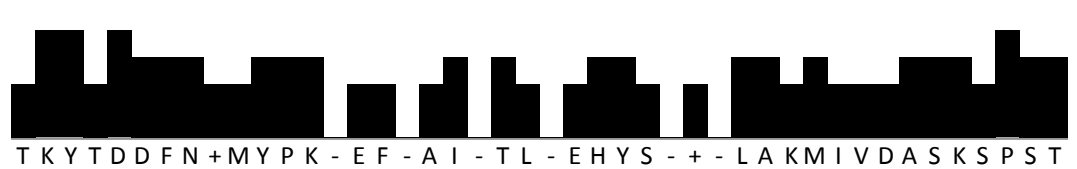

Pin\_PITG\_15142T0/1-490 343 E S L A S Q L Q R E L L E N W Y K Q G N A P S Y V F K R L Q L D K T G E R L F D S P I L 386  
Pso\_286249/1-489 340 Q S I A K R L D T E M F L A W N K K G D A P G T V F T L L K L N K A G D N L F D S P L L 383  
Pca\_129113/1-478 333 S S I A H R L N T E Q F R D W L N T R Q S P V R V F K L L K L D E A G D K L F Q S P V I 376  
Prm\_Prm\_85377/1-491 342 E S I A T K L N T E L F T Y W K T S G N T P K F I F P L L K L N G E G D N L F K S P T F 385

Conservation

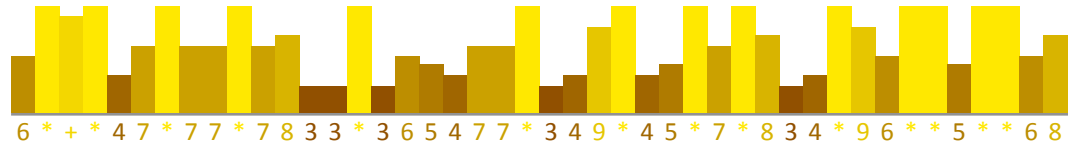

Quality

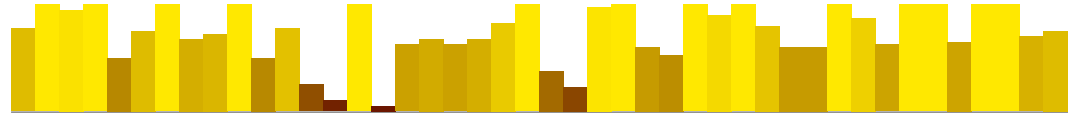

Consensus

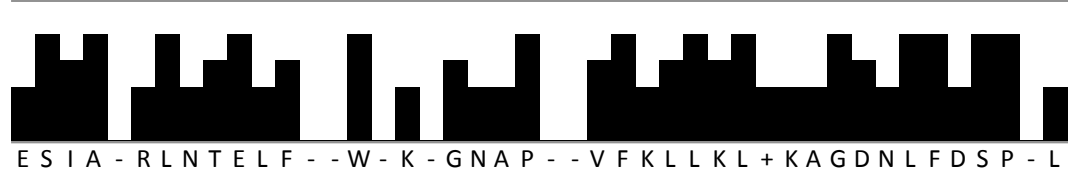

Pin\_PITG\_15142T0/1-490 387 D T W R Q Y V D Y F R R R K P K Q K V N M L A I L K E H Y K D D G V L A K M L V E A S E 430  
Pso\_286249/1-489 384 T M W Q K Y I A F F R E K N P S Q R V N E L S I L R K H F N D A - N L S K M L L D A E K 426  
Pca\_129113/1-478 377 T T W L N Y A T F Y N T K - - R E K V S I T T L L R K R F G D E - V L A G I L T E A Q Q 417  
Prm\_Prm\_85377/1-491 386 V A W L Q Y I T F F K D A K P R P Q V D V L E I L R N N F N T D - T L A R M F S E G S K 428

Conservation

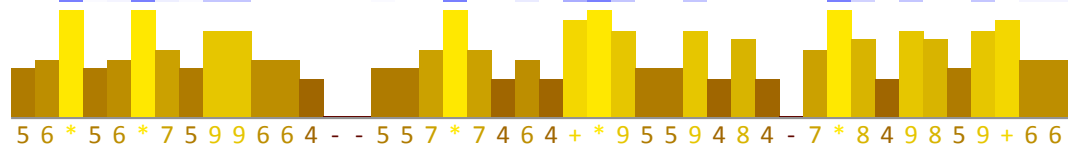

Quality

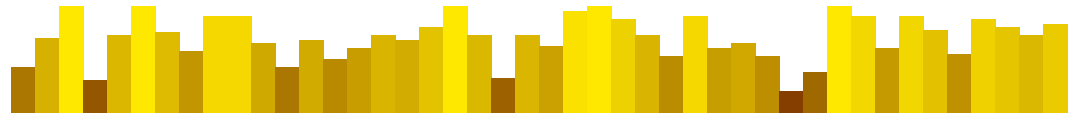

Consensus

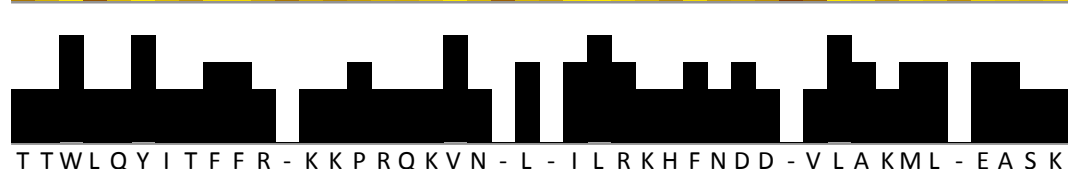

Pin\_PITG\_15142T0/1-490 431 V S S T K T M A T D L L D A F T L R W M Y N R E S P T N V Y Q W L R V E G T S K D N A I 474  
Pso\_286249/1-489 427 V P S T K A Y A S D L L D D L L I R W M A G E T D P R K V Y A W L R V E G S A E Y D V A 470  
Pca\_129113/1-478 418 V P A T K E E A T K L L T S L V G R W P K S R V H P D N V Y K W L R V Q G R E K T D G F 461  
Prm\_Prm\_85377/1-491 429 V P G V R T I A S D L Q Y N L L V R W M K T K T D P A R V L K W L R V E G T A E N D A A 472

Conservation

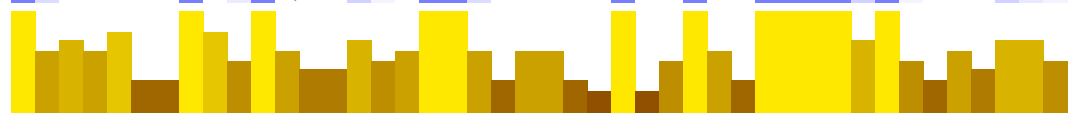

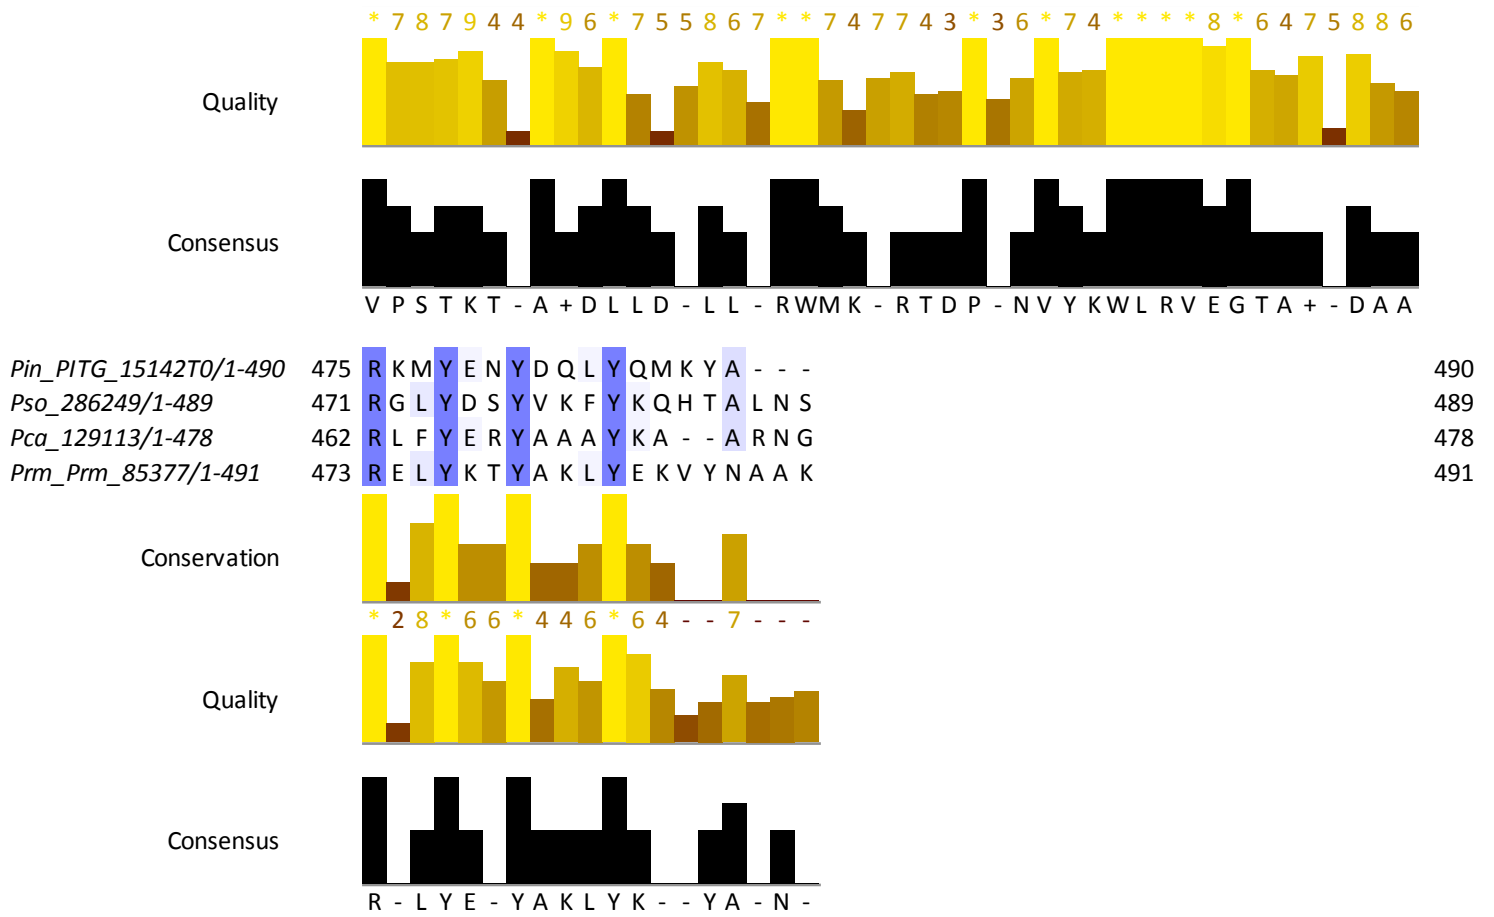

Supplementary Figure 23: Multiple sequence alignments of the 28 orthologs of RxLR-like effectors.

## Supplementary Figure 24

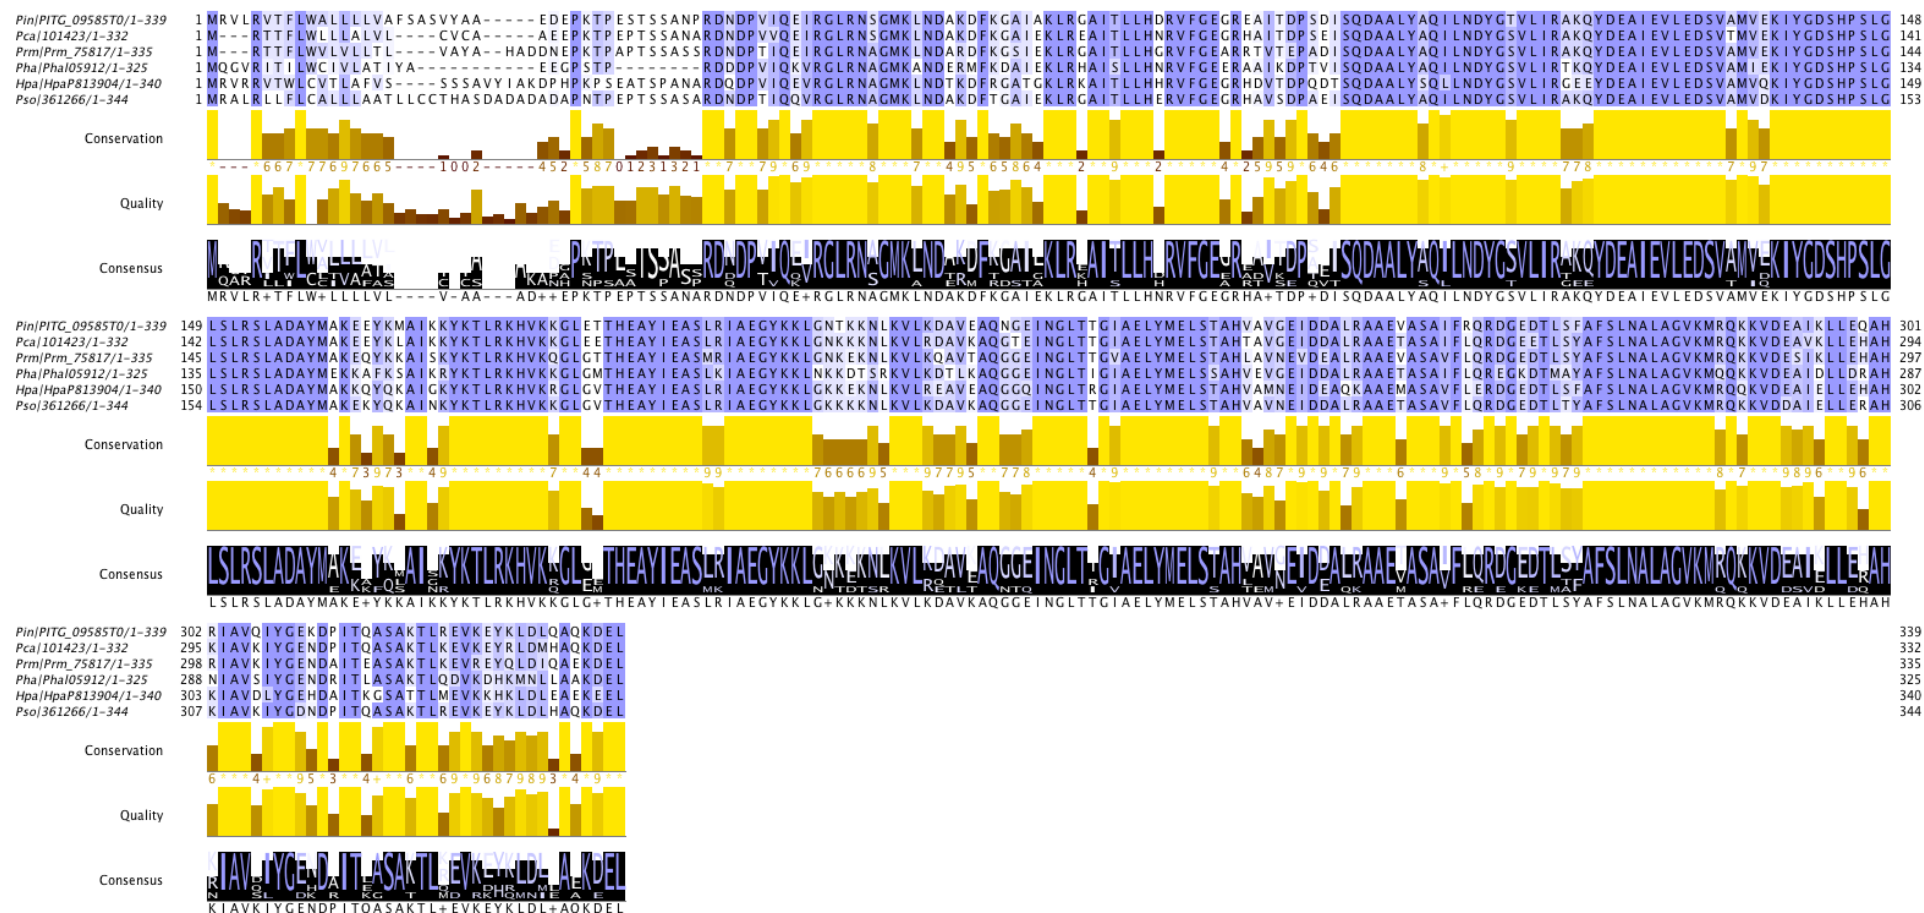

Supplementary Figure 24: Multiple sequence alignment of the RxLR-like proteins of Ortholog 1.

Supplementary Figure 25

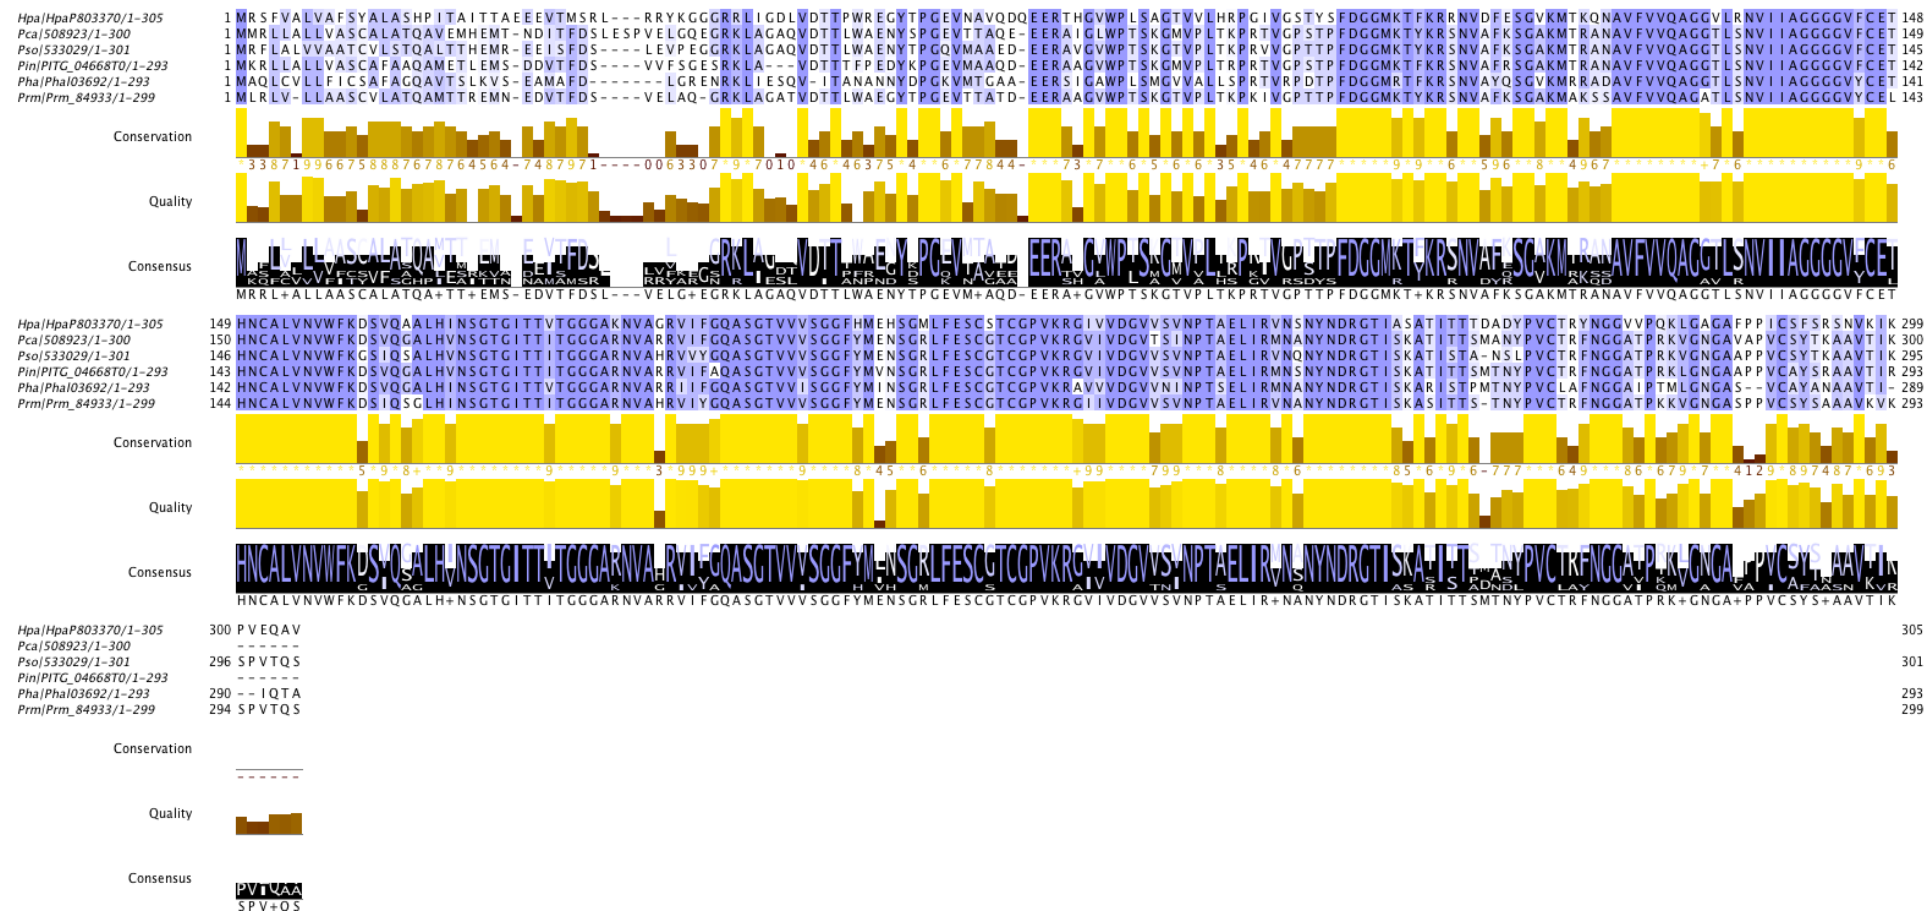

Supplementary Figure 25: Multiple sequence alignment of the RxLR-like proteins of Ortholog 2.

# Supplementary Figure 26

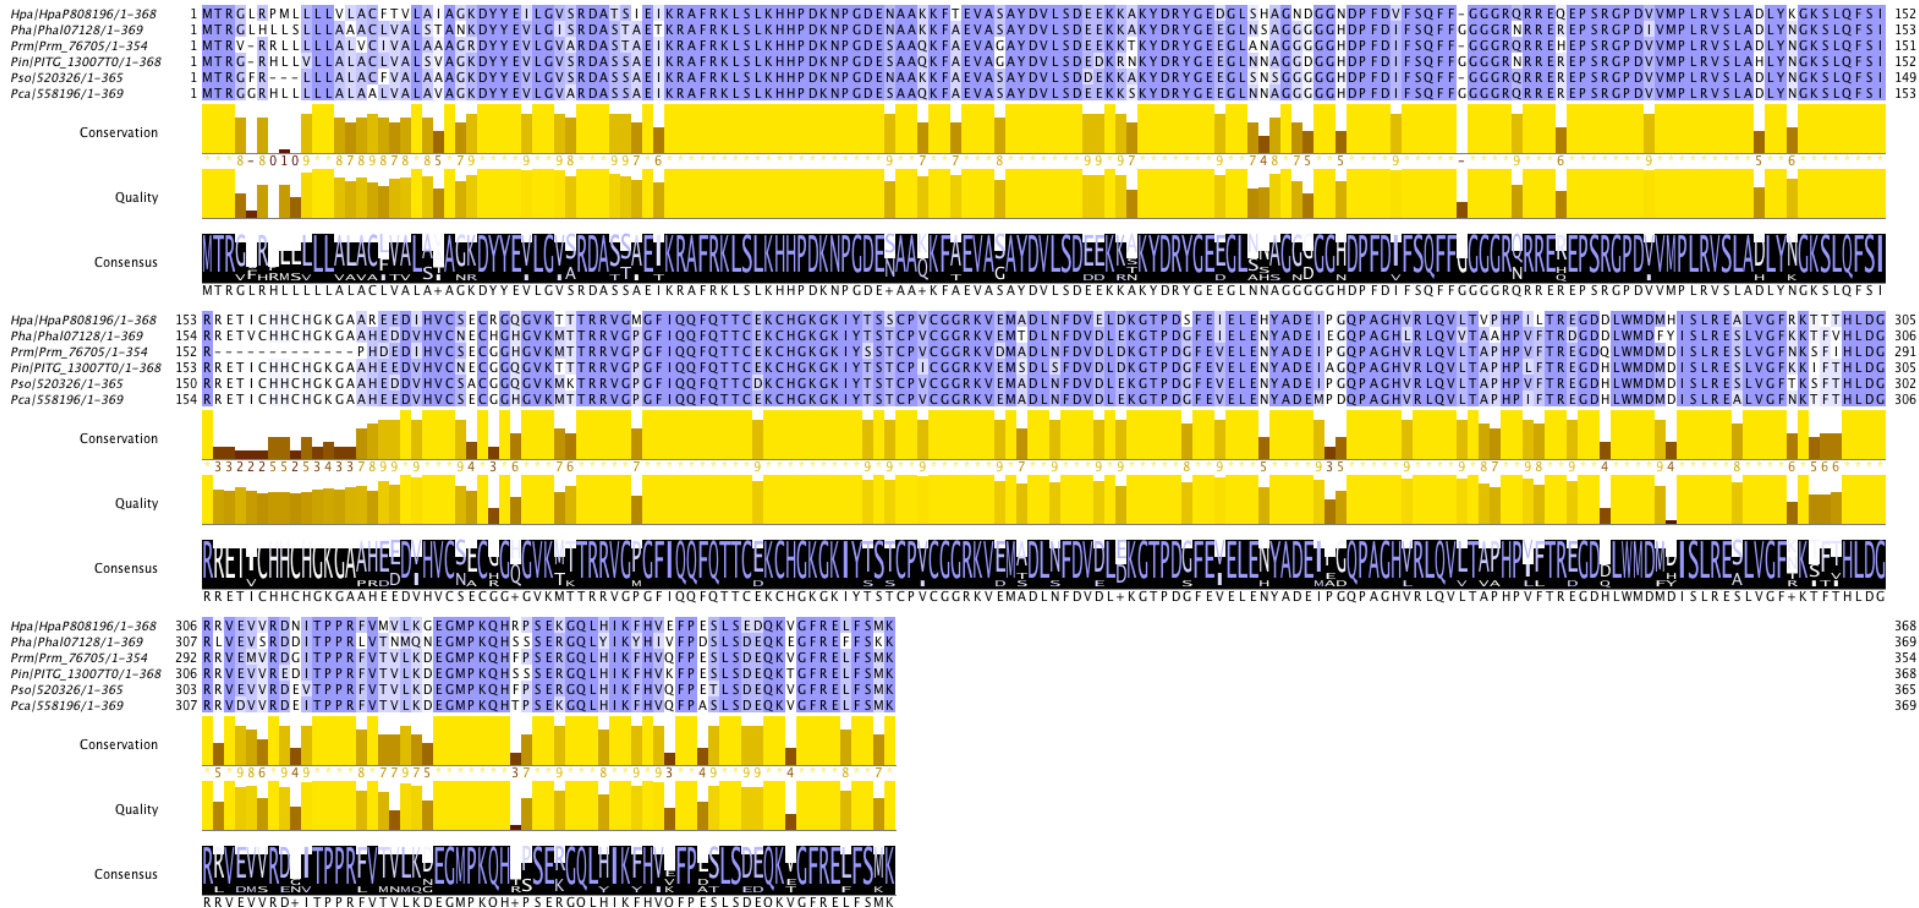

Supplementary Figure 26: Multiple sequence alignment of the RxLR-like proteins of Ortholog 3.

## Supplementary Figure 27

**A**

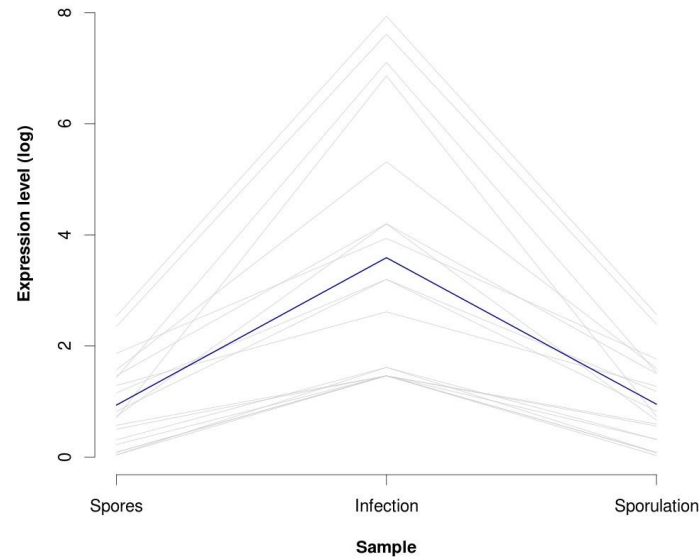

**B**

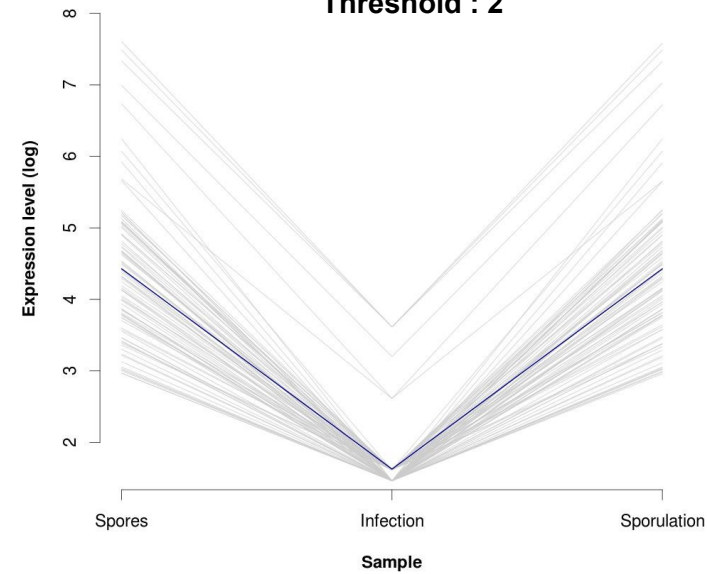

- A** RxLR effectors up-regulated during infection
  - B** RxLR effectors down-regulated during infection
  - C** CRN effectors up-regulated during infection
  - D** CRN effectors down-regulated during infection
- Threshold : 2**

**C**

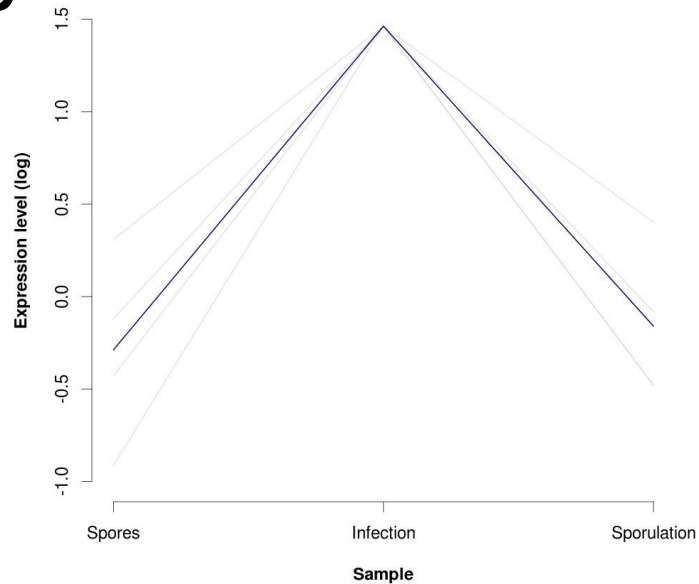

**D**

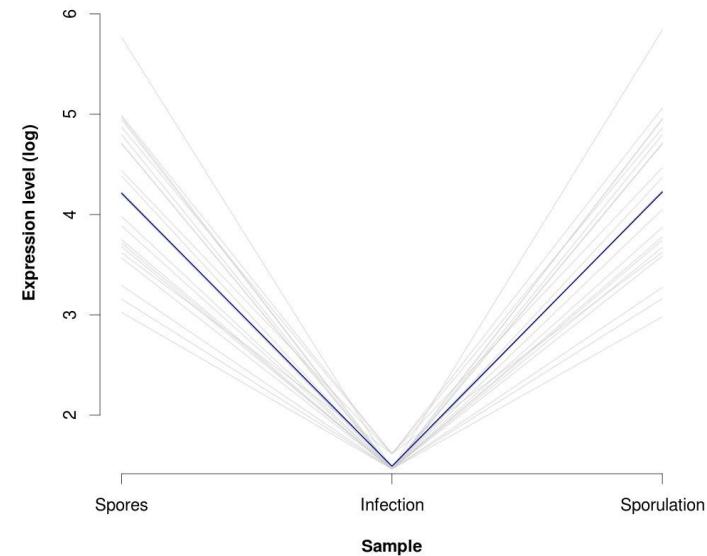

**Supplementary figure 27:** Expression profiling of the candidate RxLR and CRNs encoding genes. Expression values have been estimated in terms of log2.

## Supplementary Figure 28

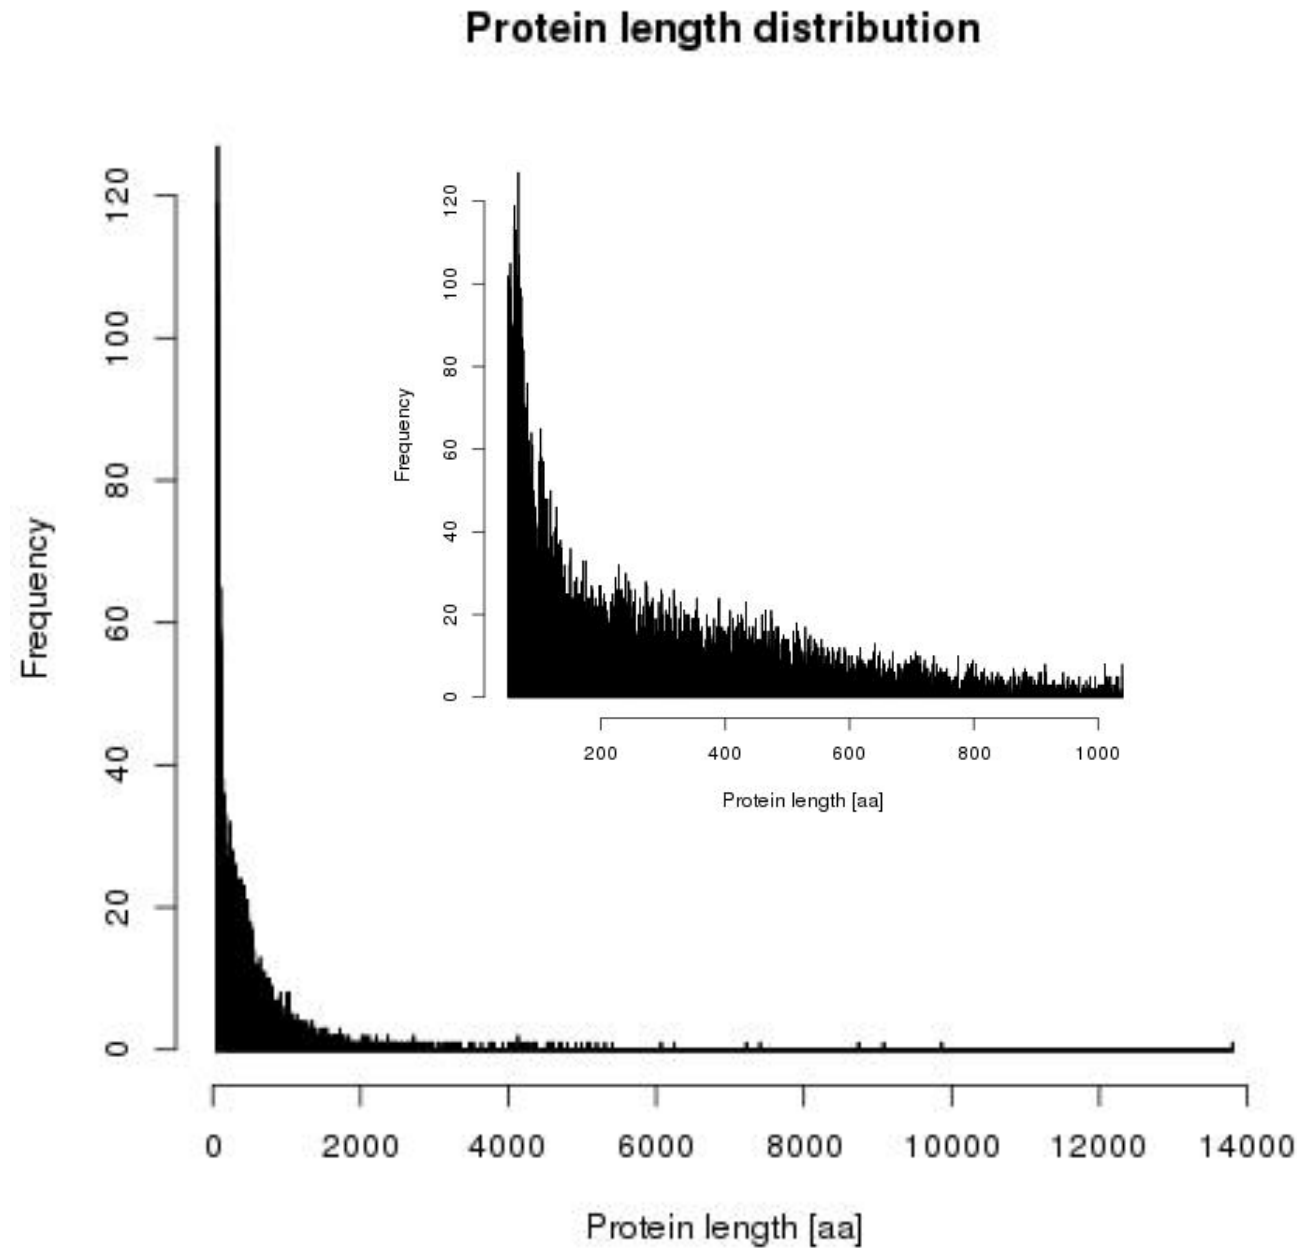

**Supplementary Figure 28:** Protein length distribution.
