# Supplementary material for: Genome analyses of the sunflower pathogen Plasmopara halstedii provide insights into effector evolution in downy mildews and Phytophthora
Source: BMC Genomics. 2015 Oct 5;16:741. doi: 10.1186/s12864-015-1904-7 (PMC4594904; doi:10.1186/s12864-015-1904-7)
Supplement: Additional file 23: — Six orthologs of candidate RxLR-like proteins among the downy mildew genomes. (XLSX 34 kb) [file 12864_2015_1904_MOESM23_ESM.xlsx]

## Sheet: Sheet1
Orthologs	Hy. arabidopsidis	Pl. halstedii	InterPro Domains/Annotations
1	HpaP803370	PHALS_03692	pectate lyase
2	HpaP808196	PHALS_07128	chaperone
3	HpaP812054	PHALS_10131	3-deoxy-7-phosphoheptulonate synthase
4	HpaP813794	PHALS_05151	hypothetical protein
5	HpaP813795	PHALS_03534	hypothetical protein
6	HpaP813904	PHALS_05912	Kinesin light chain
