# Supplementary material for: Genome analyses of the sunflower pathogen Plasmopara halstedii provide insights into effector evolution in downy mildews and Phytophthora
Source: BMC Genomics. 2015 Oct 5;16:741. doi: 10.1186/s12864-015-1904-7 (PMC4594904; doi:10.1186/s12864-015-1904-7)
Supplement: Additional file 25: — Gene expression values of up-regulated candidate RxLR-like proteins and CRNs of Pl. halstedii. (XLSX 14 kb) [file 12864_2015_1904_MOESM25_ESM.xlsx]

## Sheet: RXLR up.tsv
RxLR-like
ID	Spores	Infection	Sporulation	Cluster	Ratio
PHALS_09493	0.037696	1.61477	0.080268	UP	20.1173
PHALS_01997	0.037696	1.46276	0.080268	UP	18.2236
PHALS_01925	0.086605	1.46276	0.0278	UP	16.89
PHALS_07395	0.086605	1.46276	0.080268	UP	16.89
PHALS_02474	0.703277	6.86269	0.732344	UP	9.37086
PHALS_12545	0.734304	4.19973	0.66523	UP	5.71934
PHALS_00680	0.308998	1.61477	0.317307	UP	5.08897
PHALS_07525	1.42764	7.10662	1.52084	UP	4.67282
PHALS_02775	0.224109	1.46276	0.317307	UP	4.60993
PHALS_07800	0.823571	3.19973	0.827502	UP	3.86673
PHALS_08947	1.57203	5.3152	1.59484	UP	3.33275
PHALS_01906	2.34964	7.61477	2.39185	UP	3.18363
PHALS_15372	2.53727	7.93669	2.56753	UP	3.09117
PHALS_00498	1.46512	4.19973	1.50173	UP	2.79659
PHALS_03568	1.15699	3.19973	1.1798	UP	2.71209
PHALS_15464	0.501643	1.46276	0.558315	UP	2.61996
PHALS_14932	0.572032	1.46276	0.594841	UP	2.45908
PHALS_06084	1.86621	3.93669	1.76477	UP	2.10945
PHALS_00454	1.28824	2.61477	1.27291	UP	2.02972
PHALS_08665	0.734304	1.46276	0.699177	UP	1.99204
PHALS_08160	2.65545	5.19973	2.64795	UP	1.95814
PHALS_02021	2.309	4.42212	2.27291	UP	1.91517
PHALS_07471	0.671568	1.46276	0.764766	UP	1.91269
PHALS_09199	1.4835	2.61477	1.46274	UP	1.76257
PHALS_11791	0.85214	1.46276	0.796475	UP	1.71657
PHALS_03252	2.02521	3.19973	2.06733	UP	1.54776
PHALS_11047	0.961075	1.46276	0.945338	UP	1.52201
PHALS_05687	3.84505	5.70223	3.87283	UP	1.47237
PHALS_11397	3.92118	5.70223	3.90227	UP	1.45421
PHALS_04575	1.06236	1.46276	1.05427	UP	1.3769
PHALS_11173	2.36954	3.19973	2.41246	UP	1.32633
PHALS_04554	2.98061	3.93669	2.9664	UP	1.32076
PHALS_13297	5.0715	6.42212	5.01606	UP	1.26632
PHALS_00020	1.17972	1.46276	1.13089	UP	1.23993
PHALS_12466	1.15699	1.46276	1.22711	UP	1.19204
PHALS_10418	3.74957	4.42212	3.74865	UP	1.17937
PHALS_09459	4.42289	5.0742	4.46767	UP	1.13576
PHALS_07041	4.22137	4.78469	4.23001	UP	1.13113
PHALS_04028	1.309	1.46276	1.20365	UP	1.11747
PHALS_09117	3.235	3.61476	3.24446	UP	1.11414
PHALS_06247	2.40853	2.61477	2.31731	UP	1.08563
PHALS_09211	2.4465	2.61477	2.42266	UP	1.06878
PHALS_09382	1.28824	1.46276	1.38144	UP	1.05887
PHALS_13771	5.39039	5.52166	5.39185	UP	1.02407
PHALS_00942	-4.97229	1.46276	-4.87909	UP	-0.299802
PHALS_00965	-4.97229	1.46276	-4.87909	UP	-0.299802
PHALS_02228	-4.97229	1.46276	-4.87909	UP	-0.299802
PHALS_02311	-4.97229	1.46276	-4.87909	UP	-0.299802
PHALS_03039	-4.97229	1.46276	-4.87909	UP	-0.299802
PHALS_04894	-4.97229	1.46276	-4.87909	UP	-0.299802
PHALS_05391	-4.97229	1.46276	-4.87909	UP	-0.299802
PHALS_05828	-4.97229	1.46276	-4.87909	UP	-0.299802
PHALS_06086	-4.97229	1.46276	-4.87909	UP	-0.299802
PHALS_07687	-4.97229	1.46276	-4.87909	UP	-0.299802
PHALS_08020	-4.97229	1.46276	-4.87909	UP	-0.299802
PHALS_08943	-4.97229	1.46276	-4.87909	UP	-0.299802
PHALS_09325	-4.97229	1.46276	-4.87909	UP	-0.299802
PHALS_10349	-4.97229	1.46276	-4.87909	UP	-0.299802
PHALS_11016	-4.97229	1.46276	-4.87909	UP	-0.299802
PHALS_11905	-4.97229	1.46276	-4.87909	UP	-0.299802
PHALS_12759	-4.97229	1.46276	-4.87909	UP	-0.299802
PHALS_13753	-4.97229	1.46276	-4.87909	UP	-0.299802
PHALS_14024	-4.97229	1.46276	-4.87909	UP	-0.299802
PHALS_14143	-4.97229	1.46276	-4.87909	UP	-0.299802
PHALS_05664	-4.82029	1.46276	-4.87909	UP	-0.30346
PHALS_03613	-4.82029	1.46276	-4.72709	UP	-0.309443
PHALS_09850	-4.82029	1.46276	-4.72709	UP	-0.309443
PHALS_10842	-4.82029	1.46276	-4.72709	UP	-0.309443
PHALS_01455	-3.82029	1.46276	-4.72709	UP	-0.382894
PHALS_02576	-3.23532	1.46276	-3.72709	UP	-0.452123
PHALS_12920	-3.23532	1.46276	-3.14213	UP	-0.465533
PHALS_13290	-2.82029	1.46276	-3.14213	UP	-0.518658
PHALS_09212	-4.97229	2.61477	-4.87909	UP	-0.535913
PHALS_08227	-2.49836	1.46276	-2.72709	UP	-0.58549
PHALS_01265	-2.23532	1.46276	-2.14213	UP	-0.682856
PHALS_02276	-1.82028	1.46276	-1.91973	UP	-0.80359
PHALS_04350	-1.82028	1.46276	-1.91973	UP	-0.80359
PHALS_04734	-1.82028	1.46276	-1.91973	UP	-0.80359
PHALS_08945	-4.97229	4.93669	-4.87909	UP	-1.01181
PHALS_05098	-1.36085	1.46276	-1.26766	UP	-1.15391
PHALS_08657	-1.01293	1.46276	-1.14213	UP	-1.44409
PHALS_08663	-1.01293	1.46276	-1.02665	UP	-1.44409
PHALS_14370	-0.732822	1.46276	-0.727087	UP	-2.01181
PHALS_05442	-0.820285	1.46276	-0.639625	UP	-2.28691
PHALS_02754	-0.572358	1.46276	-0.820197	UP	-2.55568
PHALS_04312	-0.572358	1.46276	-0.727087	UP	-2.55568
PHALS_10747	-0.572358	1.46276	-0.639625	UP	-2.55568
PHALS_10059	-0.572358	1.46276	-0.557162	UP	-2.62538
PHALS_10037	-0.498357	1.46276	-0.639625	UP	-2.93517
PHALS_07853	-0.572358	1.46276	-0.47916	UP	-3.05276
PHALS_09677	-1.23532	3.61476	-1.14213	UP	-3.16495
PHALS_08315	-0.427968	1.46276	-0.47916	UP	-3.41793
PHALS_02763	-0.498357	1.46276	-0.405159	UP	-3.61034
PHALS_08152	-0.427968	1.46276	-0.405159	UP	-3.61034
PHALS_03471	-1.36085	5.52166	-1.26766	UP	-4.3558
PHALS_11981	-0.235323	1.46276	-0.33477	UP	-6.21598
PHALS_02098	0.086605	1.46276	-0.142125	UP	-10.2921
PHALS_11175	-0.498357	3.93669	-0.33477	UP	-11.7594
PHALS_05161	-0.235323	2.61477	-0.203525	UP	-12.8474
PHALS_07036	-0.119846	1.61477	-0.142125	UP	-13.4737
PHALS_00775	-0.065398	1.46276	-0.142125	UP	-22.3672
PHALS_05607	-0.01293	3.19973	-0.142125	UP	-247.459
CRNs
ID	Spores	Infection	Sporulation	Cluster	Ratio
PHALS_12040	0.308998	1.46276	0.402196	UP	3.63694
PHALS_03351	-4.97229	1.46276	-4.87909	UP	0.299802
PHALS_06691	-4.97229	1.46276	-4.87909	UP	0.299802
PHALS_08613	-4.97229	1.46276	-4.87909	UP	0.299802
PHALS_09068	-3.82029	1.46276	-3.72709	UP	0.392468
PHALS_13620	-4.82029	1.46276	-3.72709	UP	0.392468
PHALS_00642	-1.65036	1.46276	-1.72709	UP	0.886329
PHALS_05517	-1.65036	1.46276	-1.72709	UP	0.886329
PHALS_12613	-1.36085	1.46276	-1.26766	UP	1.15391
PHALS_09757	-1.11985	1.46276	-1.14213	UP	1.30622
PHALS_01050	-1.11985	1.46276	-0.919732	UP	1.59042
PHALS_10993	-0.913395	1.46276	-1.14213	UP	1.60146
PHALS_06444	-0.913395	1.46276	-0.47916	UP	3.05276
PHALS_08660	-0.427968	1.46276	-0.47916	UP	3.41793
PHALS_04385	-0.119846	1.46276	-0.083231	UP	17.5747
